# Supplementary material for: Worldwide inequality in access to full text scientific articles: the example of ophthalmology
Source: PeerJ. 2019 Oct 30;7:e7850. doi: 10.7717/peerj.7850 (PMC6825414; doi:10.7717/peerj.7850)
Supplement: Supplemental Information 4 — Raw data [file peerj-07-7850-s004.xlsx]

## Sheet: 11103_articles
ID	Title	Authors	Details	Journal	Duplicates [=SI(NB.SI($E$2:E3;E3)>1;"";"n")]	Year	Duplicates (journal)	Duplicates [=SI([@[Doublon (journal)]]="n";"";[@Journal])]	Random	Column	DOI	PMID	OA PMC	OA journal (full hybrid)	OA PMC2	OA restrained	OA full text access (legal)	Paywalled article full text access	University Caen availaibility?	Access R1 + S1+ T1	Other access	RG access	Sci-hub access	Access V1 +W1 + X1	Final full text availability	Remarks	Digital Object Identifier (DOI)	Reference to be given to participants	Access to full text (Y/N)
9380	Aflibercept in persistent neovascular AMD: comparison of different treatment strategies in switching therapy.	Ricci F, Parravano M, Regine F, Sciamanna M, Tedeschi M, Missiroli F, Varano M.	Eye (Lond). 2017 Jan;31(1):163-164. doi: 10.1038/eye.2016.215. Epub 2016 Oct 7. No abstract available.	Eye (Lond)		2017			0.00010068		doi: 10.1038/eye.2016.215	27716748					0			0				0	0		doi: 10.1038/eye.2016.215	Ricci F, Parravano M, Regine F, Sciamanna M, Tedeschi M, Missiroli F, Varano M., Aflibercept in persistent neovascular AMD: comparison of different treatment strategies in switching therapy. Eye (Lond). 2017
2167	Sustained Benefits of Ranibizumab with or without Laser in Branch Retinal Vein Occlusion: 24-Month Results of the BRIGHTER Study.	Tadayoni R, Waldstein SM, Boscia F, Gerding H, Gekkieva M, Barnes E, Das Gupta A, Wenzel A, Pearce I; BRIGHTER Study Group..	Ophthalmology. 2017 Dec;124(12):1778-1787. doi: 10.1016/j.ophtha.2017.06.027. Epub 2017 Aug 12. Erratum in: Ophthalmology. 2018 Mar;125(3):463.	Ophthalmology		2017			0.000214248		doi: 10.1016/j.ophtha.2017.06.027	28807635					0			0				0	0		doi: 10.1016/j.ophtha.2017.06.027	Tadayoni R, Waldstein SM, Boscia F, Gerding H, Gekkieva M, Barnes E, Das Gupta A, Wenzel A, Pearce I; BRIGHTER Study Group.., Sustained Benefits of Ranibizumab with or without Laser in Branch Retinal Vein Occlusion: 24-Month Results of the BRIGHTER Study. Ophthalmology. 2017
7868	Valproic acid and ASK1 deficiency ameliorate optic neuritis and neurodegeneration in an animal model of multiple sclerosis.	Azuchi Y, Kimura A, Guo X, Akiyama G, Noro T, Harada C, Nishigaki A, Namekata K, Harada T.	Neurosci Lett. 2017 Feb 3;639:82-87. doi: 10.1016/j.neulet.2016.12.057. Epub 2016 Dec 28.	Neurosci Lett		2017			0.000215616		doi: 10.1016/j.neulet.2016.12.057	28040492					0			0				0	0		doi: 10.1016/j.neulet.2016.12.057	Azuchi Y, Kimura A, Guo X, Akiyama G, Noro T, Harada C, Nishigaki A, Namekata K, Harada T., Valproic acid and ASK1 deficiency ameliorate optic neuritis and neurodegeneration in an animal model of multiple sclerosis. Neurosci Lett. 2017
8720	Objective functional visual outcomes of cataract surgery in patients with good preoperative visual acuity.	Zhu X, Ye H, He W, Yang J, Dai J, Lu Y.	Eye (Lond). 2017 Mar;31(3):452-459. doi: 10.1038/eye.2016.239. Epub 2016 Nov 18.	Eye (Lond)		2017			0.000246694		doi: 10.1038/eye.2016.239	27858933					0			0				0	0		doi: 10.1038/eye.2016.239	Zhu X, Ye H, He W, Yang J, Dai J, Lu Y., Objective functional visual outcomes of cataract surgery in patients with good preoperative visual acuity. Eye (Lond). 2017
9321	The combination of vestibular impairment and congenital sensorineural hearing loss predisposes patients to ocular anomalies, including Usher syndrome.	Kletke S, Batmanabane V, Dai T, Vincent A, Li S, Gordon KA, Papsin BC, Cushing SL, Héon E.	Clin Genet. 2017 Jul;92(1):26-33. doi: 10.1111/cge.12895. Epub 2017 Jan 16.	Clin Genet		2017			0.00026022		doi: 10.1111/cge.12895	27743452					0			0				0	0		doi: 10.1111/cge.12895	Kletke S, Batmanabane V, Dai T, Vincent A, Li S, Gordon KA, Papsin BC, Cushing SL, Héon E., The combination of vestibular impairment and congenital sensorineural hearing loss predisposes patients to ocular anomalies, including Usher syndrome. Clin Genet. 2017
6748	Protanopia (red color-blindness) in medaka: a simple system for producing color-blind fish and testing their spectral sensitivity.	Homma N, Harada Y, Uchikawa T, Kamei Y, Fukamachi S.	BMC Genet. 2017 Feb 6;18(1):10. doi: 10.1186/s12863-017-0477-7.	BMC Genet		2017			0.000472837		doi: 10.1186/s12863-017-0477-7	28166717					0			0				0	0		doi: 10.1186/s12863-017-0477-7	Homma N, Harada Y, Uchikawa T, Kamei Y, Fukamachi S., Protanopia (red color-blindness) in medaka: a simple system for producing color-blind fish and testing their spectral sensitivity. BMC Genet. 2017
8003	Systematic screening of Retinopathy in Diabetes (REaD project): an Italian implementation campaign.	Porta M, Boscia F, Lanzetta P, Mannucci E, Menchini U, Simonelli F.	Eur J Ophthalmol. 2017 Mar 10;27(2):179-184. doi: 10.5301/ejo.5000912. Epub 2016 Nov 21.	Eur J Ophthalmol		2017			0.0004806		doi: 10.5301/ejo.5000912	28009411					0			0				0	0		doi: 10.5301/ejo.5000912	Porta M, Boscia F, Lanzetta P, Mannucci E, Menchini U, Simonelli F., Systematic screening of Retinopathy in Diabetes (REaD project): an Italian implementation campaign. Eur J Ophthalmol. 2017
10390	Optical coherence tomography of outer retinal holes in senile retinoschisis and schisis-detachment.	Rachitskaya AV, Yuan A, Singh RP, Sears JE, Schachat AP.	Br J Ophthalmol. 2017 Apr;101(4):445-448. doi: 10.1136/bjophthalmol-2016-308551. Epub 2016 Jun 24.	Br J Ophthalmol		2017			0.000527087		doi: 10.1136/bjophthalmol-2016-308551	27343208					0			0				0	0		doi: 10.1136/bjophthalmol-2016-308551	Rachitskaya AV, Yuan A, Singh RP, Sears JE, Schachat AP., Optical coherence tomography of outer retinal holes in senile retinoschisis and schisis-detachment. Br J Ophthalmol. 2017
5341	Reconstruction of Combined Upper and Lower Eyelid Defects in a Patient With Lentigo Maligna.	Martínez-Palmer A, Calsina-Prat M, Ormaechea N, Toll A.	Dermatol Surg. 2017 May;43 Suppl 1:S111-S114. doi: 10.1097/DSS.0000000000000787. No abstract available.	Dermatol Surg		2017			0.000555183		doi: 10.1097/DSS.0000000000000787	28346250					0			0				0	0		doi: 10.1097/DSS.0000000000000787	Martínez-Palmer A, Calsina-Prat M, Ormaechea N, Toll A., Reconstruction of Combined Upper and Lower Eyelid Defects in a Patient With Lentigo Maligna. Dermatol Surg. 2017
956	Rare GABRA3 variants are associated with epileptic seizures, encephalopathy and dysmorphic features.	Niturad CE, Lev D, Kalscheuer VM, Charzewska A, Schubert J, Lerman-Sagie T, Kroes HY, Oegema R, Traverso M, Specchio N, Lassota M, Chelly J, Bennett-Back O, Carmi N, Koffler-Brill T, Iacomino M, Trivisano M, Capovilla G, Striano P, Nawara M, Rzonca S, Fischer U, et al.	Brain. 2017 Nov 1;140(11):2879-2894. doi: 10.1093/brain/awx236.	Brain		2017			0.00081208		doi: 10.1093/brain/awx236	29053855					0			0				0	0		doi: 10.1093/brain/awx236	Niturad CE, Lev D, Kalscheuer VM, Charzewska A, Schubert J, Lerman-Sagie T, Kroes HY, Oegema R, Traverso M, Specchio N, Lassota M, Chelly J, Bennett-Back O, Carmi N, Koffler-Brill T, Iacomino M, Trivisano M, Capovilla G, Striano P, Nawara M, Rzonca S, Fischer U, et al., Rare GABRA3 variants are associated with epileptic seizures, encephalopathy and dysmorphic features. Brain. 2017
10473	Retinal features in Mulvihill-Smith syndrome.	Tyagi P, Juma Z, Reddy AR.	Ophthalmic Genet. 2017 Mar-Apr;38(2):183-186. doi: 10.1080/13816810.2016.1188124. Epub 2016 Jun 8.	Ophthalmic Genet		2017			0.000913711		doi: 10.1080/13816810.2016.1188124	27268268					0			0				0	0		doi: 10.1080/13816810.2016.1188124	Tyagi P, Juma Z, Reddy AR., Retinal features in Mulvihill-Smith syndrome. Ophthalmic Genet. 2017
5237	Assessment of the retinal posterior pole in dominant optic atrophy by spectral-domain optical coherence tomography and microperimetry.	Cesareo M, Ciuffoletti E, Martucci A, Sebastiani J, Sorge RP, Lamantea E, Garavaglia B, Ricci F, Cusumano A, Nucci C, Brancati F.	PLoS One. 2017 Mar 30;12(3):e0174560. doi: 10.1371/journal.pone.0174560. eCollection 2017.	PLoS One		2017			0.000997285		doi: 10.1371/journal.pone.0174560	28358911					0			0				0	0		doi: 10.1371/journal.pone.0174560	Cesareo M, Ciuffoletti E, Martucci A, Sebastiani J, Sorge RP, Lamantea E, Garavaglia B, Ricci F, Cusumano A, Nucci C, Brancati F., Assessment of the retinal posterior pole in dominant optic atrophy by spectral-domain optical coherence tomography and microperimetry. PLoS One. 2017
10279	Evaluation of Goldmann applanation tonometry, rebound tonometry and dynamic contour tonometry in keratoconus.	Özcura F, Yıldırım N, Tambova E, Şahin A.	J Optom. 2017 Apr - Jun;10(2):117-122. doi: 10.1016/j.optom.2016.04.005. Epub 2016 Jul 9.	J Optom		2017			0.00109986		doi: 10.1016/j.optom.2016.04.005	27402573					0			0				0	0		doi: 10.1016/j.optom.2016.04.005	Özcura F, Yıldırım N, Tambova E, Şahin A., Evaluation of Goldmann applanation tonometry, rebound tonometry and dynamic contour tonometry in keratoconus. J Optom. 2017
9278	Horizontal Gaze Palsy and Progressive Scoliosis With ROBO 3 Mutations in Patients From Cape Verde.	Mendes Marques NBPS, Barros SR, Miranda AF, Nobre Cardoso J, Parreira S, Fonseca T, Donaire NM, Campos N.	J Neuroophthalmol. 2017 Jun;37(2):162-165. doi: 10.1097/WNO.0000000000000455.	J Neuroophthalmol		2017			0.00113278		doi: 10.1097/WNO.0000000000000455	27749773					0			0				0	0		doi: 10.1097/WNO.0000000000000455	Mendes Marques NBPS, Barros SR, Miranda AF, Nobre Cardoso J, Parreira S, Fonseca T, Donaire NM, Campos N., Horizontal Gaze Palsy and Progressive Scoliosis With ROBO 3 Mutations in Patients From Cape Verde. J Neuroophthalmol. 2017
7957	Steroid-Sparing Effect of 0.1% Tacrolimus Eye Drop for Treatment of Shield Ulcer and Corneal Epitheliopathy in Refractory Allergic Ocular Diseases.	Miyazaki D, Fukushima A, Ohashi Y, Ebihara N, Uchio E, Okamoto S, Shoji J, Takamura E, Nakagawa Y, Namba K, Fujishima H.	Ophthalmology. 2017 Mar;124(3):287-294. doi: 10.1016/j.ophtha.2016.11.002. Epub 2016 Dec 22.	Ophthalmology		2017			0.00121358		doi: 10.1016/j.ophtha.2016.11.002	28017421					0			0				0	0		doi: 10.1016/j.ophtha.2016.11.002	Miyazaki D, Fukushima A, Ohashi Y, Ebihara N, Uchio E, Okamoto S, Shoji J, Takamura E, Nakagawa Y, Namba K, Fujishima H., Steroid-Sparing Effect of 0.1% Tacrolimus Eye Drop for Treatment of Shield Ulcer and Corneal Epitheliopathy in Refractory Allergic Ocular Diseases. Ophthalmology. 2017
8368	First-line intra-arterial versus intravenous chemotherapy in unilateral sporadic group D retinoblastoma: evidence of better visual outcomes, ocular survival and shorter time to success with intra-arterial delivery from retrospective review of 20 years of treatment.	Munier FL, Mosimann P, Puccinelli F, Gaillard MC, Stathopoulos C, Houghton S, Bergin C, Beck-Popovic M.	Br J Ophthalmol. 2017 Aug;101(8):1086-1093. doi: 10.1136/bjophthalmol-2016-309298. Epub 2016 Dec 7.	Br J Ophthalmol		2017			0.00124033		doi: 10.1136/bjophthalmol-2016-309298	27927678					0			0				0	0		doi: 10.1136/bjophthalmol-2016-309298	Munier FL, Mosimann P, Puccinelli F, Gaillard MC, Stathopoulos C, Houghton S, Bergin C, Beck-Popovic M., First-line intra-arterial versus intravenous chemotherapy in unilateral sporadic group D retinoblastoma: evidence of better visual outcomes, ocular survival and shorter time to success with intra-arterial delivery from retrospective review of 20 years of treatment. Br J Ophthalmol. 2017
563	Foveal microvasculature features of surgically closed macular hole using optical coherence tomography angiography.	Cho JH, Yi HC, Bae SH, Kim H.	BMC Ophthalmol. 2017 Nov 28;17(1):217. doi: 10.1186/s12886-017-0607-z.	BMC Ophthalmol		2017			0.00159441		doi: 10.1186/s12886-017-0607-z	29179702					0			0				0	0		doi: 10.1186/s12886-017-0607-z	Cho JH, Yi HC, Bae SH, Kim H., Foveal microvasculature features of surgically closed macular hole using optical coherence tomography angiography. BMC Ophthalmol. 2017
1746	Prevalence and Causes of Visual Impairment in Fundong District, North West Cameroon: Results of a Population-Based Survey.	Oye J, Mactaggart I, Polack S, Schmidt E, Tamo V, Okwen M, Kuper H.	Ophthalmic Epidemiol. 2017 Dec;24(6):394-400. doi: 10.1080/09286586.2017.1313992. Epub 2017 Sep 8.	Ophthalmic Epidemiol		2017			0.00179366		doi: 10.1080/09286586.2017.1313992	28886257					0			0				0	0		doi: 10.1080/09286586.2017.1313992	Oye J, Mactaggart I, Polack S, Schmidt E, Tamo V, Okwen M, Kuper H., Prevalence and Causes of Visual Impairment in Fundong District, North West Cameroon: Results of a Population-Based Survey. Ophthalmic Epidemiol. 2017
271	Retinal Vein Occlusion Review.	Ip M, Hendrick A.	Asia Pac J Ophthalmol (Phila). 2018 Jan-Feb;7(1):40-45. doi: 10.22608/APO.2017442. Epub 2017 Dec 27. Review.	Asia Pac J Ophthalmol (Phila)		2018			0.00198465		doi: 10.22608/APO.2017442	29280368					0			0				0	0		doi: 10.22608/APO.2017442	Ip M, Hendrick A., Retinal Vein Occlusion Review. Asia Pac J Ophthalmol (Phila). 2018
6411	Near binocular visual function in young adult orthokeratology versus soft contact lens wearers.	Gifford K, Gifford P, Hendicott PL, Schmid KL.	Cont Lens Anterior Eye. 2017 Jun;40(3):184-189. doi: 10.1016/j.clae.2017.01.003. Epub 2017 Feb 16.	Cont Lens Anterior Eye		2017			0.00201855		doi: 10.1016/j.clae.2017.01.003	28215499					0			0				0	0		doi: 10.1016/j.clae.2017.01.003	Gifford K, Gifford P, Hendicott PL, Schmid KL., Near binocular visual function in young adult orthokeratology versus soft contact lens wearers. Cont Lens Anterior Eye. 2017
7267	Radiation Cataractogenesis: The Progression of Our Understanding and Its Clinical Consequences.	Khan DZ, Lacasse MC, Khan R, Murphy KJ.	J Vasc Interv Radiol. 2017 Mar;28(3):412-419. doi: 10.1016/j.jvir.2016.11.043. Epub 2017 Jan 19. Review.	J Vasc Interv Radiol		2017			0.00203729		doi: 10.1016/j.jvir.2016.11.043	28111197					0			0				0	0		doi: 10.1016/j.jvir.2016.11.043	Khan DZ, Lacasse MC, Khan R, Murphy KJ., Radiation Cataractogenesis: The Progression of Our Understanding and Its Clinical Consequences. J Vasc Interv Radiol. 2017
9397	Influence of Gender on Epidemiology and Clinical Manifestations of Sarcoidosis: A Population-Based Retrospective Cohort Study 1976-2013.	Ungprasert P, Crowson CS, Matteson EL.	Lung. 2017 Feb;195(1):87-91. doi: 10.1007/s00408-016-9952-6. Epub 2016 Oct 5.	Lung		2017			0.0020399		doi: 10.1007/s00408-016-9952-6	27709291					0			0				0	0		doi: 10.1007/s00408-016-9952-6	Ungprasert P, Crowson CS, Matteson EL., Influence of Gender on Epidemiology and Clinical Manifestations of Sarcoidosis: A Population-Based Retrospective Cohort Study 1976-2013. Lung. 2017
2223	What is the relationship between visual impairment and cognitive function in octogenarians?	de Kok DS, Teh RO, Pillai A, Connolly MJ, Wilkinson TJ, Moyes SA, Jacobs R, Muru-Lanning M, Rolleston A, Schiphof D, Kerse N.	N Z Med J. 2017 Aug 11;130(1460):33-47.	N Z Med J		2017			0.00214216		#VALUE!	28796770					0			0				0	0		#VALUE!	de Kok DS, Teh RO, Pillai A, Connolly MJ, Wilkinson TJ, Moyes SA, Jacobs R, Muru-Lanning M, Rolleston A, Schiphof D, Kerse N., What is the relationship between visual impairment and cognitive function in octogenarians? N Z Med J. 2017
6273	Macular hole surgery: the healing process of outer retinal layers to visual acuity recovery.	Caprani SM, Donati S, Bartalena L, Vinciguerra R, Mariotti C, Testa F, Porta G, Azzolini C.	Eur J Ophthalmol. 2017 Mar 10;27(2):235-239. doi: 10.5301/ejo.5000905. Epub 2017 Feb 22.	Eur J Ophthalmol		2017			0.00231413		doi: 10.5301/ejo.5000905	28233890					0			0				0	0		doi: 10.5301/ejo.5000905	Caprani SM, Donati S, Bartalena L, Vinciguerra R, Mariotti C, Testa F, Porta G, Azzolini C., Macular hole surgery: the healing process of outer retinal layers to visual acuity recovery. Eur J Ophthalmol. 2017
1808	Intracranial pressure-induced optic nerve sheath response as a predictive biomarker for optic disc edema in astronauts.	Wostyn P, De Deyn PP.	Biomark Med. 2017 Nov;11(11):1003-1008. doi: 10.2217/bmm-2017-0218. Epub 2017 Sep 4. Review.	Biomark Med		2017			0.00283084		doi: 10.2217/bmm-2017-0218	28869392					0			0				0	0		doi: 10.2217/bmm-2017-0218	Wostyn P, De Deyn PP., Intracranial pressure-induced optic nerve sheath response as a predictive biomarker for optic disc edema in astronauts. Biomark Med. 2017
8	A case report of neuromyelitis optica spectrum disorder with peripheral neuropathy as the first episode.	Chi LM, Gao Y, Nan GX.	Medicine (Baltimore). 2018 Mar;97(10):e0059. doi: 10.1097/MD.0000000000010059.	Medicine (Baltimore)		2018			0.00296634		doi: 10.1097/MD.0000000000010059	29517664	1	1			1			1		1	1	1	1		doi: 10.1097/MD.0000000000010059	Chi LM, Gao Y, Nan GX., A case report of neuromyelitis optica spectrum disorder with peripheral neuropathy as the first episode. Medicine (Baltimore). 2018
4879	Noninvasive Quantification of Retinal Microglia Using Widefield Autofluorescence Imaging.	Kokona D, Schneider N, Giannakaki-Zimmermann H, Jovanovic J, Ebneter A, Zinkernagel M.	Invest Ophthalmol Vis Sci. 2017 Apr 1;58(4):2160-2165. doi: 10.1167/iovs.16-20916.	Invest Ophthalmol Vis Sci		2017			0.00300371		doi: 10.1167/iovs.16-20916	28395300					0			0				0	0		doi: 10.1167/iovs.16-20916	Kokona D, Schneider N, Giannakaki-Zimmermann H, Jovanovic J, Ebneter A, Zinkernagel M., Noninvasive Quantification of Retinal Microglia Using Widefield Autofluorescence Imaging. Invest Ophthalmol Vis Sci. 2017
1889	Should Oral Corticosteroids Be Used to Treat Demyelinating Optic Neuritis?	Morrow MJ, Ko MW.	J Neuroophthalmol. 2017 Dec;37(4):444-450. doi: 10.1097/WNO.0000000000000555. No abstract available.	J Neuroophthalmol		2017			0.00317614		doi: 10.1097/WNO.0000000000000555	28857910					0			0				0	0		doi: 10.1097/WNO.0000000000000555	Morrow MJ, Ko MW., Should Oral Corticosteroids Be Used to Treat Demyelinating Optic Neuritis? J Neuroophthalmol. 2017
5485	Acute macular edema and peripapillary soft exudate after pancreas transplantation with accelerated progression of diabetic retinopathy.	Tsai FY, Lau LI, Li AF, Chen SJ, Wang SE, Lee FL, Liu CJ, Shyr YM.	J Chin Med Assoc. 2017 May;80(5):319-325. doi: 10.1016/j.jcma.2017.01.004. Epub 2017 Mar 18.	J Chin Med Assoc		2017			0.00324333		doi: 10.1016/j.jcma.2017.01.004	28330678					0			0				0	0		doi: 10.1016/j.jcma.2017.01.004	Tsai FY, Lau LI, Li AF, Chen SJ, Wang SE, Lee FL, Liu CJ, Shyr YM., Acute macular edema and peripapillary soft exudate after pancreas transplantation with accelerated progression of diabetic retinopathy. J Chin Med Assoc. 2017
2364	Superior and Lateral Rectus Myopexy for Acquired Adult Distance Esotropia: A "One Size Fits All" Surgery.	Morad Y, Pras E, Nemet A.	Strabismus. 2017 Sep;25(3):140-144. doi: 10.1080/09273972.2017.1349816. Epub 2017 Jul 31.	Strabismus		2017			0.00348469		doi: 10.1080/09273972.2017.1349816	28759293					0			0				0	0		doi: 10.1080/09273972.2017.1349816	Morad Y, Pras E, Nemet A., Superior and Lateral Rectus Myopexy for Acquired Adult Distance Esotropia: A "One Size Fits All" Surgery. Strabismus. 2017
9977	Biomechanics of the Levator Aponeurosis.	Repp DJ, Rubinstein TJ, Herreid PA, Sires BS.	Ophthal Plast Reconstr Surg. 2017 Jul/Aug;33(4):251-255. doi: 10.1097/IOP.0000000000000731.	Ophthal Plast Reconstr Surg		2017			0.00364813		doi: 10.1097/IOP.0000000000000731	27517973					0			0				0	0		doi: 10.1097/IOP.0000000000000731	Repp DJ, Rubinstein TJ, Herreid PA, Sires BS., Biomechanics of the Levator Aponeurosis. Ophthal Plast Reconstr Surg. 2017
1060	Safety and efficacy of multiple cyclocoagulation of ciliary bodies by high-intensity focused ultrasound in patients with glaucoma.	De Gregorio A, Pedrotti E, Stevan G, Montali M, Morselli S.	Graefes Arch Clin Exp Ophthalmol. 2017 Dec;255(12):2429-2435. doi: 10.1007/s00417-017-3817-4. Epub 2017 Oct 17.	Graefes Arch Clin Exp Ophthalmol		2017			0.00365016		doi: 10.1007/s00417-017-3817-4	29043438					0			0				0	0		doi: 10.1007/s00417-017-3817-4	De Gregorio A, Pedrotti E, Stevan G, Montali M, Morselli S., Safety and efficacy of multiple cyclocoagulation of ciliary bodies by high-intensity focused ultrasound in patients with glaucoma. Graefes Arch Clin Exp Ophthalmol. 2017
4434	Antiretinal antibodies in central serous chorioretinopathy: prevalence and clinical implications.	Ten Berge JCEM, van Dijk EHC, Schreurs MWJ, Vermeer J, Boon CJF, Rothova A.	Acta Ophthalmol. 2018 Feb;96(1):56-62. doi: 10.1111/aos.13445. Epub 2017 Apr 26.	Acta Ophthalmol		2018			0.00386508		doi: 10.1111/aos.13445	28444929					0			0				0	0		doi: 10.1111/aos.13445	Ten Berge JCEM, van Dijk EHC, Schreurs MWJ, Vermeer J, Boon CJF, Rothova A., Antiretinal antibodies in central serous chorioretinopathy: prevalence and clinical implications. Acta Ophthalmol. 2018
7060	Optic disc haemorrhages at baseline as a risk factor for poor outcome in the Idiopathic Intracranial Hypertension Treatment Trial.	Wall M, Thurtell MJ; NORDIC Idiopathic Intracranial Hypertension Study Group..	Br J Ophthalmol. 2017 Sep;101(9):1256-1260. doi: 10.1136/bjophthalmol-2016-309852. Epub 2017 Jan 27.	Br J Ophthalmol		2017			0.0039086		doi: 10.1136/bjophthalmol-2016-309852	28130349					0			0				0	0		doi: 10.1136/bjophthalmol-2016-309852	Wall M, Thurtell MJ; NORDIC Idiopathic Intracranial Hypertension Study Group.., Optic disc haemorrhages at baseline as a risk factor for poor outcome in the Idiopathic Intracranial Hypertension Treatment Trial. Br J Ophthalmol. 2017
532	Comparison of laser and circumlimbal suture induced elevation of intraocular pressure in albino CD-1 mice.	Liu HH, Zhang L, Shi M, Chen L, Flanagan JG.	PLoS One. 2017 Nov 30;12(11):e0189094. doi: 10.1371/journal.pone.0189094. eCollection 2017.	PLoS One		2017			0.00405279		doi: 10.1371/journal.pone.0189094	29190824					0			0				0	0		doi: 10.1371/journal.pone.0189094	Liu HH, Zhang L, Shi M, Chen L, Flanagan JG., Comparison of laser and circumlimbal suture induced elevation of intraocular pressure in albino CD-1 mice. PLoS One. 2017
8534	Hemianopic line bisection error in a patient with Alzheimer's disease.	Kang H, Kim SK, Park KJ, Choi NC, Kwon OY, Lim BH.	Neurol Sci. 2017 Mar;38(3):489-491. doi: 10.1007/s10072-016-2785-5. Epub 2016 Nov 28.	Neurol Sci		2017			0.00407886		doi: 10.1007/s10072-016-2785-5	27896492					0			0				0	0		doi: 10.1007/s10072-016-2785-5	Kang H, Kim SK, Park KJ, Choi NC, Kwon OY, Lim BH., Hemianopic line bisection error in a patient with Alzheimer's disease. Neurol Sci. 2017
2317	Prognostic relevance of MOG antibodies in children with an acquired demyelinating syndrome.	Hennes EM, Baumann M, Schanda K, Anlar B, Bajer-Kornek B, Blaschek A, Brantner-Inthaler S, Diepold K, Eisenkölbl A, Gotwald T, Kuchukhidze G, Gruber-Sedlmayr U, Häusler M, Höftberger R, Karenfort M, Klein A, Koch J, Kraus V, Lechner C, Leiz S, Leypoldt F, Mader S, et al.	Neurology. 2017 Aug 29;89(9):900-908. doi: 10.1212/WNL.0000000000004312. Epub 2017 Aug 2.	Neurology		2017			0.00419539		doi: 10.1212/WNL.0000000000004312	28768844					0			0				0	0		doi: 10.1212/WNL.0000000000004312	Hennes EM, Baumann M, Schanda K, Anlar B, Bajer-Kornek B, Blaschek A, Brantner-Inthaler S, Diepold K, Eisenkölbl A, Gotwald T, Kuchukhidze G, Gruber-Sedlmayr U, Häusler M, Höftberger R, Karenfort M, Klein A, Koch J, Kraus V, Lechner C, Leiz S, Leypoldt F, Mader S, et al., Prognostic relevance of MOG antibodies in children with an acquired demyelinating syndrome. Neurology. 2017
1974	Comparison of astigmatism prediction error taken with the Pentacam measurements, Baylor nomogram, and Barrett formula for toric intraocular lens implantation.	Park DY, Lim DH, Hwang S, Hyun J, Chung TY.	BMC Ophthalmol. 2017 Aug 24;17(1):156. doi: 10.1186/s12886-017-0550-z.	BMC Ophthalmol		2017			0.00422771		doi: 10.1186/s12886-017-0550-z	28836956					0			0				0	0		doi: 10.1186/s12886-017-0550-z	Park DY, Lim DH, Hwang S, Hyun J, Chung TY., Comparison of astigmatism prediction error taken with the Pentacam measurements, Baylor nomogram, and Barrett formula for toric intraocular lens implantation. BMC Ophthalmol. 2017
9238	Tele-ophthalmology for diabetic retinopathy screening: 8 years of experience.	Pareja-Ríos A, Bonaque-González S, Serrano-García M, Cabrera-López F, Abreu-Reyes P, Marrero-Saavedra MD.	Arch Soc Esp Oftalmol. 2017 Feb;92(2):63-70. doi: 10.1016/j.oftal.2016.08.006. Epub 2016 Oct 15. English, Spanish.	Arch Soc Esp Oftalmol		2017			0.00426961		doi: 10.1016/j.oftal.2016.08.006	27756515					0			0				0	0		doi: 10.1016/j.oftal.2016.08.006	Pareja-Ríos A, Bonaque-González S, Serrano-García M, Cabrera-López F, Abreu-Reyes P, Marrero-Saavedra MD., Tele-ophthalmology for diabetic retinopathy screening: 8 years of experience. Arch Soc Esp Oftalmol. 2017
8735	Catheter-guided suprachoroidal buckling of rhegmatogenous retinal detachments secondary to peripheral retinal breaks.	Mikhail M, El-Rayes EN, Kojima K, Ajlan R, Rezende F.	Graefes Arch Clin Exp Ophthalmol. 2017 Jan;255(1):17-23. doi: 10.1007/s00417-016-3530-8. Epub 2016 Nov 16.	Graefes Arch Clin Exp Ophthalmol		2017			0.00432932		doi: 10.1007/s00417-016-3530-8	27853956					0			0				0	0		doi: 10.1007/s00417-016-3530-8	Mikhail M, El-Rayes EN, Kojima K, Ajlan R, Rezende F., Catheter-guided suprachoroidal buckling of rhegmatogenous retinal detachments secondary to peripheral retinal breaks. Graefes Arch Clin Exp Ophthalmol. 2017
7689	Subclinical Herpes Simplex Virus Type 1 Infections Provide Site-Specific Resistance to an Unrelated Pathogen.	Rowe AM, Yun H, Treat BR, Kinchington PR, Hendricks RL.	J Immunol. 2017 Feb 15;198(4):1706-1717. doi: 10.4049/jimmunol.1601310. Epub 2017 Jan 6.	J Immunol		2017			0.00441364		doi: 10.4049/jimmunol.1601310	28062697					0			0				0	0		doi: 10.4049/jimmunol.1601310	Rowe AM, Yun H, Treat BR, Kinchington PR, Hendricks RL., Subclinical Herpes Simplex Virus Type 1 Infections Provide Site-Specific Resistance to an Unrelated Pathogen. J Immunol. 2017
6354	Pediatric ocular trauma score as a prognostic tool in the management of pediatric traumatic cataracts.	Shah MA, Agrawal R, Teoh R, Shah SM, Patel K, Gupta S, Gosai S.	Graefes Arch Clin Exp Ophthalmol. 2017 May;255(5):1027-1036. doi: 10.1007/s00417-017-3616-y. Epub 2017 Feb 22.	Graefes Arch Clin Exp Ophthalmol		2017			0.00454186		doi: 10.1007/s00417-017-3616-y	28224290					0			0				0	0		doi: 10.1007/s00417-017-3616-y	Shah MA, Agrawal R, Teoh R, Shah SM, Patel K, Gupta S, Gosai S., Pediatric ocular trauma score as a prognostic tool in the management of pediatric traumatic cataracts. Graefes Arch Clin Exp Ophthalmol. 2017
8719	Contrast sensitivity and its determinants in people with diabetes: SN-DREAMS-II, Report No 6.	Gella L, Raman R, Pal SS, Ganesan S, Sharma T.	Eye (Lond). 2017 Mar;31(3):460-466. doi: 10.1038/eye.2016.252. Epub 2016 Nov 18.	Eye (Lond)		2017			0.00456067		doi: 10.1038/eye.2016.252	27858934					0			0				0	0		doi: 10.1038/eye.2016.252	Gella L, Raman R, Pal SS, Ganesan S, Sharma T., Contrast sensitivity and its determinants in people with diabetes: SN-DREAMS-II, Report No 6. Eye (Lond). 2017
7472	Thick keratoconic cornea associated with posterior polymorphous corneal dystrophy.	Zaarour K, Slim E, Antoun J, Waked N.	J Fr Ophtalmol. 2017 Mar;40(3):232-236. doi: 10.1016/j.jfo.2016.09.014. Epub 2017 Jan 13.	J Fr Ophtalmol		2017			0.0045653		doi: 10.1016/j.jfo.2016.09.014	28089285					0			0				0	0		doi: 10.1016/j.jfo.2016.09.014	Zaarour K, Slim E, Antoun J, Waked N., Thick keratoconic cornea associated with posterior polymorphous corneal dystrophy. J Fr Ophtalmol. 2017
9249	ULTRA-WIDE-FIELD FUNDUS AUTOFLUORESCENCE FINDINGS IN PATIENTS WITH ACUTE ZONAL OCCULT OUTER RETINOPATHY.	Shifera AS, Pennesi ME, Yang P, Lin P.	Retina. 2017 Jun;37(6):1104-1119. doi: 10.1097/IAE.0000000000001311.	Retina		2017			0.00482876		doi: 10.1097/IAE.0000000000001311	27755372					0			0				0	0		doi: 10.1097/IAE.0000000000001311	Shifera AS, Pennesi ME, Yang P, Lin P., ULTRA-WIDE-FIELD FUNDUS AUTOFLUORESCENCE FINDINGS IN PATIENTS WITH ACUTE ZONAL OCCULT OUTER RETINOPATHY. Retina. 2017
1559	An erosive lesion in the orbital apex as the presenting sign of sarcoidosis.	Nasrazadani D, Quick AK, White WA.	Digit J Ophthalmol. 2017 Mar 4;23(1):26-28. doi: 10.5693/djo.02.2016.01.001. eCollection 2017.	Digit J Ophthalmol		2017			0.00488869		doi: 10.5693/djo.02.2016.01.001	28924417					0			0				0	0		doi: 10.5693/djo.02.2016.01.001	Nasrazadani D, Quick AK, White WA., An erosive lesion in the orbital apex as the presenting sign of sarcoidosis. Digit J Ophthalmol. 2017
2186	On variants and disease-causing mutations: Case studies of a SEMA4A variant identified in inherited blindness.	Bryant L, Lozynska O, Han G, Morgan JIW, Gai X, Maguire AM, Aleman T, Bennett J.	Ophthalmic Genet. 2018 Jan-Feb;39(1):144-146. doi: 10.1080/13816810.2017.1354384. Epub 2017 Aug 14.	Ophthalmic Genet		2018			0.00510969		doi: 10.1080/13816810.2017.1354384	28805479					0			0				0	0		doi: 10.1080/13816810.2017.1354384	Bryant L, Lozynska O, Han G, Morgan JIW, Gai X, Maguire AM, Aleman T, Bennett J., On variants and disease-causing mutations: Case studies of a SEMA4A variant identified in inherited blindness. Ophthalmic Genet. 2018
8833	CHARACTERIZATION AND DIFFERENTIATION OF POLYPOIDAL CHOROIDAL VASCULOPATHY USING SWEPT SOURCE OPTICAL COHERENCE TOMOGRAPHY ANGIOGRAPHY.	Cheung CMG, Yanagi Y, Mohla A, Lee SY, Mathur R, Chan CM, Yeo I, Wong TY.	Retina. 2017 Aug;37(8):1464-1474. doi: 10.1097/IAE.0000000000001391.	Retina		2017			0.00513232		doi: 10.1097/IAE.0000000000001391	27828911					0			0				0	0		doi: 10.1097/IAE.0000000000001391	Cheung CMG, Yanagi Y, Mohla A, Lee SY, Mathur R, Chan CM, Yeo I, Wong TY., CHARACTERIZATION AND DIFFERENTIATION OF POLYPOIDAL CHOROIDAL VASCULOPATHY USING SWEPT SOURCE OPTICAL COHERENCE TOMOGRAPHY ANGIOGRAPHY. Retina. 2017
1056	Association of polymorphisms in the intron of TCF4 gene to late-onset Fuchs endothelial corneal dystrophy: An Indian cohort study.	Rao BS, Tharigopala A, Rachapalli SR, Rajagopal R, Soumittra N.	Indian J Ophthalmol. 2017 Oct;65(10):931-935. doi: 10.4103/ijo.IJO_191_17.	Indian J Ophthalmol		2017			0.00516673		doi: 10.4103/ijo.IJO_191_17	29044056					0			0				0	0		doi: 10.4103/ijo.IJO_191_17	Rao BS, Tharigopala A, Rachapalli SR, Rajagopal R, Soumittra N., Association of polymorphisms in the intron of TCF4 gene to late-onset Fuchs endothelial corneal dystrophy: An Indian cohort study. Indian J Ophthalmol. 2017
6208	Inverted conjunctival papilloma: a certainly underestimated high-risk lesion for carcinomatous transformation-a case report.	Lassalle S, Maschi C, Caujolle JP, Giordanengo V, Hofman P.	Can J Ophthalmol. 2017 Feb;52(1):e30-e31. doi: 10.1016/j.jcjo.2016.08.003. Epub 2016 Nov 16. No abstract available.	Can J Ophthalmol		2017			0.00520168		doi: 10.1016/j.jcjo.2016.08.003	28237169					0			0				0	0		doi: 10.1016/j.jcjo.2016.08.003	Lassalle S, Maschi C, Caujolle JP, Giordanengo V, Hofman P., Inverted conjunctival papilloma: a certainly underestimated high-risk lesion for carcinomatous transformation-a case report. Can J Ophthalmol. 2017
1367	Exploring genome-wide DNA methylation patterns in Aicardi syndrome.	Piras IS, Mills G, Llaci L, Naymik M, Ramsey K, Belnap N, Balak CD, Jepsen WM, Szelinger S, Siniard AL, Lewis CR, LaFleur M, Richholt RF, De Both MD, Avela K, Rangasamy S, Craig DW, Narayanan V, Järvelä I, Huentelman MJ, Schrauwen I.	Epigenomics. 2017 Nov;9(11):1373-1386. doi: 10.2217/epi-2017-0060. Epub 2017 Oct 2.	Epigenomics		2017			0.00526263		doi: 10.2217/epi-2017-0060	28967789					0			0				0	0		doi: 10.2217/epi-2017-0060	Piras IS, Mills G, Llaci L, Naymik M, Ramsey K, Belnap N, Balak CD, Jepsen WM, Szelinger S, Siniard AL, Lewis CR, LaFleur M, Richholt RF, De Both MD, Avela K, Rangasamy S, Craig DW, Narayanan V, Järvelä I, Huentelman MJ, Schrauwen I., Exploring genome-wide DNA methylation patterns in Aicardi syndrome. Epigenomics. 2017
9546	Trabeculectomy Combined With Collagen Matrix Implant (Ologen).	Perez CI, Mellado F, Jones A, Colvin R.	J Glaucoma. 2017 Jan;26(1):54-58. doi: 10.1097/IJG.0000000000000551.	J Glaucoma		2017			0.00548065		doi: 10.1097/IJG.0000000000000551	27661986					0			0				0	0		doi: 10.1097/IJG.0000000000000551	Perez CI, Mellado F, Jones A, Colvin R., Trabeculectomy Combined With Collagen Matrix Implant (Ologen). J Glaucoma. 2017
1530	Intraocular Infection with a Trematode.	Guzman-Salas PJ, Serna-Ojeda JC.	N Engl J Med. 2017 Sep 21;377(12):e15. doi: 10.1056/NEJMicm1615038. No abstract available.	N Engl J Med		2017			0.00557034		doi: 10.1056/NEJMicm1615038	28930513					0			0				0	0		doi: 10.1056/NEJMicm1615038	Guzman-Salas PJ, Serna-Ojeda JC., Intraocular Infection with a Trematode. N Engl J Med. 2017
6230	Optical coherence tomography angiography in chorioretinal disorders.	De Oliveira PR, Berger AR, Chow DR.	Can J Ophthalmol. 2017 Feb;52(1):125-136. doi: 10.1016/j.jcjo.2016.07.015. Epub 2016 Nov 28. Review.	Can J Ophthalmol		2017			0.00584198		doi: 10.1016/j.jcjo.2016.07.015	28237138					0			0				0	0		doi: 10.1016/j.jcjo.2016.07.015	De Oliveira PR, Berger AR, Chow DR., Optical coherence tomography angiography in chorioretinal disorders. Can J Ophthalmol. 2017
2370	Anti-C1q autoantibodies in patients with neuromyelitis optica spectrum disorders.	Yoshikura N, Kimura A, Hayashi Y, Inuzuka T.	J Neuroimmunol. 2017 Sep 15;310:150-157. doi: 10.1016/j.jneuroim.2017.07.006. Epub 2017 Jul 19.	J Neuroimmunol		2017			0.00589949		doi: 10.1016/j.jneuroim.2017.07.006	28756870					0			0				0	0		doi: 10.1016/j.jneuroim.2017.07.006	Yoshikura N, Kimura A, Hayashi Y, Inuzuka T., Anti-C1q autoantibodies in patients with neuromyelitis optica spectrum disorders. J Neuroimmunol. 2017
7322	Scleral buckling in phakic uncomplicated primary rhegmatogenous retinal detachment: long-term outcomes.	Quijano C, Alkabes M, Gómez-Resa M, Oleñik A, Villani E, Corcóstegui B.	Eur J Ophthalmol. 2017 Mar 10;27(2):220-225. doi: 10.5301/ejo.5000914. Epub 2016 Dec 31.	Eur J Ophthalmol		2017			0.00601096		doi: 10.5301/ejo.5000914	28106235					0			0				0	0		doi: 10.5301/ejo.5000914	Quijano C, Alkabes M, Gómez-Resa M, Oleñik A, Villani E, Corcóstegui B., Scleral buckling in phakic uncomplicated primary rhegmatogenous retinal detachment: long-term outcomes. Eur J Ophthalmol. 2017
10089	Visual outcomes and late complications in paediatric orbital rhabdomyosarcoma.	Eade E, Tumuluri K, Do H, Rowe N, Smith J.	Clin Exp Ophthalmol. 2017 Mar;45(2):168-173. doi: 10.1111/ceo.12809. Epub 2016 Sep 7.	Clin Exp Ophthalmol		2017			0.00619056		doi: 10.1111/ceo.12809	27473389					0			0				0	0		doi: 10.1111/ceo.12809	Eade E, Tumuluri K, Do H, Rowe N, Smith J., Visual outcomes and late complications in paediatric orbital rhabdomyosarcoma. Clin Exp Ophthalmol. 2017
4496	What's new for us in strabismus?	Sharma P, Gaur N, Phuljhele S, Saxena R.	Indian J Ophthalmol. 2017 Mar;65(3):184-190. doi: 10.4103/ijo.IJO_867_16. Review.	Indian J Ophthalmol		2017			0.00634193		doi: 10.4103/ijo.IJO_867_16	28440246					0			0				0	0		doi: 10.4103/ijo.IJO_867_16	Sharma P, Gaur N, Phuljhele S, Saxena R., What's new for us in strabismus? Indian J Ophthalmol. 2017
5502	Hemorrhage and Infarction of the Conjunctiva and Orbit in Essential Thrombocythemia.	Na J, Choi SY, Baek S, Lee H.	J Craniofac Surg. 2017 May;28(3):750-751. doi: 10.1097/SCS.0000000000003431.	J Craniofac Surg		2017			0.00654307		doi: 10.1097/SCS.0000000000003431	28328595					0			0				0	0		doi: 10.1097/SCS.0000000000003431	Na J, Choi SY, Baek S, Lee H., Hemorrhage and Infarction of the Conjunctiva and Orbit in Essential Thrombocythemia. J Craniofac Surg. 2017
9991	EN FACE OPTICAL COHERENCE TOMOGRAPHY (OCT) AND OCT ANGIOGRAPHY FINDINGS IN RETINAL ASTROCYTIC HAMARTOMAS.	Despréaux R, Mrejen S, Quentel G, Cohen SY.	Retin Cases Brief Rep. 2017 Fall;11(4):373-379. doi: 10.1097/ICB.0000000000000374.	Retin Cases Brief Rep		2017			0.0067524		doi: 10.1097/ICB.0000000000000374	27508423					0			0				0	0		doi: 10.1097/ICB.0000000000000374	Despréaux R, Mrejen S, Quentel G, Cohen SY., EN FACE OPTICAL COHERENCE TOMOGRAPHY (OCT) AND OCT ANGIOGRAPHY FINDINGS IN RETINAL ASTROCYTIC HAMARTOMAS. Retin Cases Brief Rep. 2017
5555	Rectus muscle excyclorotation and V-pattern strabismus: a quantitative appraisal of clinical relevance in syndromic craniosynostosis.	Dagi LR, MacKinnon S, Zurakowski D, Prabhu SP.	Br J Ophthalmol. 2017 Nov;101(11):1560-1565. doi: 10.1136/bjophthalmol-2016-309996. Epub 2017 Mar 20.	Br J Ophthalmol		2017			0.006808		doi: 10.1136/bjophthalmol-2016-309996	28320694					0			0				0	0		doi: 10.1136/bjophthalmol-2016-309996	Dagi LR, MacKinnon S, Zurakowski D, Prabhu SP., Rectus muscle excyclorotation and V-pattern strabismus: a quantitative appraisal of clinical relevance in syndromic craniosynostosis. Br J Ophthalmol. 2017
9244	MACULAR HOLE AFTER PARS PLANA VITRECTOMY FOR RHEGMATOGENOUS RETINAL DETACHMENT.	Medina CA, Ortiz AG, Relhan N, Smiddy WE, Townsend JH, Flynn HW Jr.	Retina. 2017 Jun;37(6):1065-1072. doi: 10.1097/IAE.0000000000001351.	Retina		2017			0.00681411		doi: 10.1097/IAE.0000000000001351	27755378					0			0				0	0		doi: 10.1097/IAE.0000000000001351	Medina CA, Ortiz AG, Relhan N, Smiddy WE, Townsend JH, Flynn HW Jr., MACULAR HOLE AFTER PARS PLANA VITRECTOMY FOR RHEGMATOGENOUS RETINAL DETACHMENT. Retina. 2017
7843	Multivariable Regression Model of the EuroQol 5-Dimension Questionnaire in Patients Seeking Outpatient Low Vision Rehabilitation.	Malkin AG, Goldstein JE, Massof RW.	Ophthalmic Epidemiol. 2017 Jun;24(3):174-180. doi: 10.1080/09286586.2016.1257027. Epub 2017 Jan 3.	Ophthalmic Epidemiol		2017			0.0068594		doi: 10.1080/09286586.2016.1257027	28045563					0			0				0	0		doi: 10.1080/09286586.2016.1257027	Malkin AG, Goldstein JE, Massof RW., Multivariable Regression Model of the EuroQol 5-Dimension Questionnaire in Patients Seeking Outpatient Low Vision Rehabilitation. Ophthalmic Epidemiol. 2017
1756	Introductory review: periostin-gene and protein structure.	Kudo A.	Cell Mol Life Sci. 2017 Dec;74(23):4259-4268. doi: 10.1007/s00018-017-2643-5. Epub 2017 Sep 7. Review.	Cell Mol Life Sci		2017			0.00689899		doi: 10.1007/s00018-017-2643-5	28884327					0			0				0	0		doi: 10.1007/s00018-017-2643-5	Kudo A., Introductory review: periostin-gene and protein structure. Cell Mol Life Sci. 2017
1636	Photochemical Cross-Linking for Penetrating Corneal Wound Closure in Enucleated Porcine Eyes.	Wang T, Zhu L, Peng Y, Shen N, Yu Y, Yao M, Zhu J.	Curr Eye Res. 2017 Nov;42(11):1413-1419. doi: 10.1080/02713683.2017.1344712. Epub 2017 Sep 14.	Curr Eye Res		2017			0.00697533		doi: 10.1080/02713683.2017.1344712	28910157					0			0				0	0		doi: 10.1080/02713683.2017.1344712	Wang T, Zhu L, Peng Y, Shen N, Yu Y, Yao M, Zhu J., Photochemical Cross-Linking for Penetrating Corneal Wound Closure in Enucleated Porcine Eyes. Curr Eye Res. 2017
1361	Mutations in DNM1L, as in OPA1, result indominant optic atrophy despite opposite effectson mitochondrial fusion and fission.	Gerber S, Charif M, Chevrollier A, Chaumette T, Angebault C, Kane MS, Paris A, Alban J, Quiles M, Delettre C, Bonneau D, Procaccio V, Amati-Bonneau P, Reynier P, Leruez S, Calmon R, Boddaert N, Funalot B, Rio M, Bouccara D, Meunier I, Sesaki H, et al.	Brain. 2017 Oct 1;140(10):2586-2596. doi: 10.1093/brain/awx219.	Brain		2017			0.0069832		doi: 10.1093/brain/awx219	28969390					0			0				0	0		doi: 10.1093/brain/awx219	Gerber S, Charif M, Chevrollier A, Chaumette T, Angebault C, Kane MS, Paris A, Alban J, Quiles M, Delettre C, Bonneau D, Procaccio V, Amati-Bonneau P, Reynier P, Leruez S, Calmon R, Boddaert N, Funalot B, Rio M, Bouccara D, Meunier I, Sesaki H, et al., Mutations in DNM1L, as in OPA1, result indominant optic atrophy despite opposite effectson mitochondrial fusion and fission. Brain. 2017
4777	Fixational saccades are more disconjugate in adults than in children.	Shaikh AG, Ghasia FF.	PLoS One. 2017 Apr 13;12(4):e0175295. doi: 10.1371/journal.pone.0175295. eCollection 2017.	PLoS One		2017			0.00737514		doi: 10.1371/journal.pone.0175295	28406944					0			0				0	0		doi: 10.1371/journal.pone.0175295	Shaikh AG, Ghasia FF., Fixational saccades are more disconjugate in adults than in children. PLoS One. 2017
4356	Later Development of Posterior Staphyloma in Choroidal Osteoma With Choroidal Neovascularization.	Cheng YC, Shen JH, Chao AN, Chen KJ.	Retina. 2017 Aug;37(8):e95-e96. doi: 10.1097/IAE.0000000000001683. No abstract available.	Retina		2017			0.007457		doi: 10.1097/IAE.0000000000001683	28452838					0			0				0	0		doi: 10.1097/IAE.0000000000001683	Cheng YC, Shen JH, Chao AN, Chen KJ., Later Development of Posterior Staphyloma in Choroidal Osteoma With Choroidal Neovascularization. Retina. 2017
376	Combined in-depth, 3D, en face imaging of the optic disc, optic disc pits and optic disc pit maculopathy using swept-source megahertz OCT at 1050 nm.	Maertz J, Kolb JP, Klein T, Mohler KJ, Eibl M, Wieser W, Huber R, Priglinger S, Wolf A.	Graefes Arch Clin Exp Ophthalmol. 2018 Feb;256(2):289-298. doi: 10.1007/s00417-017-3857-9. Epub 2017 Dec 14.	Graefes Arch Clin Exp Ophthalmol		2018			0.00752525		doi: 10.1007/s00417-017-3857-9	29238852					0			0				0	0		doi: 10.1007/s00417-017-3857-9	Maertz J, Kolb JP, Klein T, Mohler KJ, Eibl M, Wieser W, Huber R, Priglinger S, Wolf A., Combined in-depth, 3D, en face imaging of the optic disc, optic disc pits and optic disc pit maculopathy using swept-source megahertz OCT at 1050 nm. Graefes Arch Clin Exp Ophthalmol. 2018
8859	Topical Diclofenac-Loaded Liposomes Ameliorate Laser-Induced Choroidal Neovascularization in Mice and Non-Human Primates.	Shimazawa M, Inoue Y, Masuda T, Onodera R, Tahara K, Shimizu Y, Mibe Y, Tsuruma K, Takeuchi H, Hara H.	Curr Neurovasc Res. 2017;14(1):46-52. doi: 10.2174/1567202614666161104115440.	Curr Neurovasc Res		2017			0.00752981		doi: 10.2174/1567202614666161104115440	27823554					0			0				0	0		doi: 10.2174/1567202614666161104115440	Shimazawa M, Inoue Y, Masuda T, Onodera R, Tahara K, Shimizu Y, Mibe Y, Tsuruma K, Takeuchi H, Hara H., Topical Diclofenac-Loaded Liposomes Ameliorate Laser-Induced Choroidal Neovascularization in Mice and Non-Human Primates. Curr Neurovasc Res. 2017
9524	Efficacy of adjunctive mitomycin C in transcanalicular diode laser dacryocystorhinostomy.	Ozsutcu M, Balci O, Tanriverdi C, Demirci G.	Eur Arch Otorhinolaryngol. 2017 Feb;274(2):873-877. doi: 10.1007/s00405-016-4308-7. Epub 2016 Sep 23.	Eur Arch Otorhinolaryngol		2017			0.00756668		doi: 10.1007/s00405-016-4308-7	27664138					0			0				0	0		doi: 10.1007/s00405-016-4308-7	Ozsutcu M, Balci O, Tanriverdi C, Demirci G., Efficacy of adjunctive mitomycin C in transcanalicular diode laser dacryocystorhinostomy. Eur Arch Otorhinolaryngol. 2017
5349	Missed punctal foreign body: A cause for chronic ocular irritation.	Natung T, Shullai W, Goswami PK.	Indian J Ophthalmol. 2017 Feb;65(2):165-166. doi: 10.4103/ijo.IJO_950_15. No abstract available.	Indian J Ophthalmol		2017			0.00760723		doi: 10.4103/ijo.IJO_950_15	28345575					0			0				0	0		doi: 10.4103/ijo.IJO_950_15	Natung T, Shullai W, Goswami PK., Missed punctal foreign body: A cause for chronic ocular irritation. Indian J Ophthalmol. 2017
7775	Accelerated transepithelial corneal cross-linking for progressive keratoconus: a prospective study of 12 months.	Aixinjueluo W, Usui T, Miyai T, Toyono T, Sakisaka T, Yamagami S.	Br J Ophthalmol. 2017 Sep;101(9):1244-1249. doi: 10.1136/bjophthalmol-2016-309775. Epub 2017 Jan 5.	Br J Ophthalmol		2017			0.0076411		doi: 10.1136/bjophthalmol-2016-309775	28057642					0			0				0	0		doi: 10.1136/bjophthalmol-2016-309775	Aixinjueluo W, Usui T, Miyai T, Toyono T, Sakisaka T, Yamagami S., Accelerated transepithelial corneal cross-linking for progressive keratoconus: a prospective study of 12 months. Br J Ophthalmol. 2017
9163	Botulinum toxin for treatment of restrictive strabismus.	Merino PS, Vera RE, Mariñas LG, Gómez de Liaño PS, Escribano JV.	J Optom. 2017 Jul - Sep;10(3):189-193. doi: 10.1016/j.optom.2016.09.001. Epub 2016 Oct 19.	J Optom		2017			0.00764489		doi: 10.1016/j.optom.2016.09.001	27771241					0			0				0	0		doi: 10.1016/j.optom.2016.09.001	Merino PS, Vera RE, Mariñas LG, Gómez de Liaño PS, Escribano JV., Botulinum toxin for treatment of restrictive strabismus. J Optom. 2017
7985	Neonatal airway obstruction in bilateral congenital dacryocystocoele: Case report and review of the literature.	Yin T, van der Meer G.	Int J Pediatr Otorhinolaryngol. 2017 Jan;92:161-164. doi: 10.1016/j.ijporl.2016.11.027. Epub 2016 Nov 30. Review.	Int J Pediatr Otorhinolaryngol		2017			0.0077065		doi: 10.1016/j.ijporl.2016.11.027	28012520					0			0				0	0		doi: 10.1016/j.ijporl.2016.11.027	Yin T, van der Meer G., Neonatal airway obstruction in bilateral congenital dacryocystocoele: Case report and review of the literature. Int J Pediatr Otorhinolaryngol. 2017
3397	Keratoconus progression is not inhibited by reducing eyelid muscular force with botulinum toxin A treatment: a randomized trial.	Renesto ADC, Osaki TH, Osaki MH, Hirai FE, Campos M.	Arq Bras Oftalmol. 2017 Mar-Apr;80(2):88-92. doi: 10.5935/0004-2749.20170022.	Arq Bras Oftalmol		2017			0.00776662		doi: 10.5935/0004-2749.20170022	28591280					0			0				0	0		doi: 10.5935/0004-2749.20170022	Renesto ADC, Osaki TH, Osaki MH, Hirai FE, Campos M., Keratoconus progression is not inhibited by reducing eyelid muscular force with botulinum toxin A treatment: a randomized trial. Arq Bras Oftalmol. 2017
419	Early intraocular pressure change after peripheral iridotomy with ultralow fluence pattern scanning laser and Nd:YAG laser in primary angle-closure suspect: Kowloon East Pattern Scanning Laser Study Report No. 3.	Chan JCW, Choy BNK, Chan OCC, Li KKW.	Graefes Arch Clin Exp Ophthalmol. 2018 Feb;256(2):363-369. doi: 10.1007/s00417-017-3860-1. Epub 2017 Dec 7.	Graefes Arch Clin Exp Ophthalmol		2018			0.00782595		doi: 10.1007/s00417-017-3860-1	29218423					0			0				0	0		doi: 10.1007/s00417-017-3860-1	Chan JCW, Choy BNK, Chan OCC, Li KKW., Early intraocular pressure change after peripheral iridotomy with ultralow fluence pattern scanning laser and Nd:YAG laser in primary angle-closure suspect: Kowloon East Pattern Scanning Laser Study Report No. 3. Graefes Arch Clin Exp Ophthalmol. 2018
7772	Optical coherence tomography angiography in acute non-arteritic anterior ischaemic optic neuropathy.	Sharma S, Ang M, Najjar RP, Sng C, Cheung CY, Rukmini AV, Schmetterer L, Milea D.	Br J Ophthalmol. 2017 Aug;101(8):1045-1051. doi: 10.1136/bjophthalmol-2016-309245. Epub 2017 Jan 5.	Br J Ophthalmol		2017			0.00783469		doi: 10.1136/bjophthalmol-2016-309245	28057645					0			0				0	0		doi: 10.1136/bjophthalmol-2016-309245	Sharma S, Ang M, Najjar RP, Sng C, Cheung CY, Rukmini AV, Schmetterer L, Milea D., Optical coherence tomography angiography in acute non-arteritic anterior ischaemic optic neuropathy. Br J Ophthalmol. 2017
5639	Ocular Features in a Case of Nevus of Ota.	Junejo MS, Khan MS, Mukhtar A.	J Coll Physicians Surg Pak. 2017 Mar;27(3):S56-S57. doi: 255.	J Coll Physicians Surg Pak		2017			0.00784339		doi: 255	28302248					0			0				0	0		doi: 255	Junejo MS, Khan MS, Mukhtar A., Ocular Features in a Case of Nevus of Ota. J Coll Physicians Surg Pak. 2017
5952	Inferior tarsal muscle-conjunctivectomy for reverse ptosis repair: A novel technique.	Medel R, Balaguer Solé Ò, Vasquez LM.	Orbit. 2017 Jun;36(3):125-127. doi: 10.1080/01676830.2017.1279664. Epub 2017 Mar 7.	Orbit		2017			0.00786081		doi: 10.1080/01676830.2017.1279664	28267388					0			0				0	0		doi: 10.1080/01676830.2017.1279664	Medel R, Balaguer Solé Ò, Vasquez LM., Inferior tarsal muscle-conjunctivectomy for reverse ptosis repair: A novel technique. Orbit. 2017
697	A tiny tick can cause a big health problem.	John M, Raman M, Ryan K.	Indian J Ophthalmol. 2017 Nov;65(11):1228-1232. doi: 10.4103/ijo.IJO_411_17.	Indian J Ophthalmol		2017			0.0079625		doi: 10.4103/ijo.IJO_411_17	29133662					0			0				0	0		doi: 10.4103/ijo.IJO_411_17	John M, Raman M, Ryan K., A tiny tick can cause a big health problem. Indian J Ophthalmol. 2017
1966	Analyzing and Predicting Visual Acuity Outcomes of Anti-VEGF Therapy by a Longitudinal Mixed Effects Model of Imaging and Clinical Data.	Vogl WD, Waldstein SM, Gerendas BS, Schlegl T, Langs G, Schmidt-Erfurth U.	Invest Ophthalmol Vis Sci. 2017 Aug 1;58(10):4173-4181. doi: 10.1167/iovs.17-21878.	Invest Ophthalmol Vis Sci		2017			0.0079802		doi: 10.1167/iovs.17-21878	28837729					0			0				0	0		doi: 10.1167/iovs.17-21878	Vogl WD, Waldstein SM, Gerendas BS, Schlegl T, Langs G, Schmidt-Erfurth U., Analyzing and Predicting Visual Acuity Outcomes of Anti-VEGF Therapy by a Longitudinal Mixed Effects Model of Imaging and Clinical Data. Invest Ophthalmol Vis Sci. 2017
5406	Characteristics of non-vitreoretinal ocular injury in child maltreatment: a systematic review.	Betts T, Ahmed S, Maguire S, Watts P.	Eye (Lond). 2017 Aug;31(8):1146-1154. doi: 10.1038/eye.2017.25. Epub 2017 Mar 24. Review.	Eye (Lond)		2017			0.00801741		doi: 10.1038/eye.2017.25	28338664					0			0				0	0		doi: 10.1038/eye.2017.25	Betts T, Ahmed S, Maguire S, Watts P., Characteristics of non-vitreoretinal ocular injury in child maltreatment: a systematic review. Eye (Lond). 2017
10544	Evaluation of foveal photoreceptor layer in eyes with macular edema associated with branch retinal vein occlusion after ozurdex treatment.	Altunel O, Duru N, Goktas A, Ozkose A, Goktas E, Atas M.	Int Ophthalmol. 2017 Apr;37(2):333-339. doi: 10.1007/s10792-016-0261-0. Epub 2016 May 25.	Int Ophthalmol		2017			0.00803705		doi: 10.1007/s10792-016-0261-0	27221365					0			0				0	0		doi: 10.1007/s10792-016-0261-0	Altunel O, Duru N, Goktas A, Ozkose A, Goktas E, Atas M., Evaluation of foveal photoreceptor layer in eyes with macular edema associated with branch retinal vein occlusion after ozurdex treatment. Int Ophthalmol. 2017
9586	MULTIMODAL IMAGING AND ELECTRORETINOGRAPHY IN LONG-CHAIN 3-HYDROXYACYL COENZYME A DEHYDROGENASE DEFICIENCY.	Lin J, Boudreault K, Tsang S.	Retin Cases Brief Rep. 2017 Winter;11 Suppl 1:S107-S112. doi: 10.1097/ICB.0000000000000428.	Retin Cases Brief Rep		2017			0.0080576		doi: 10.1097/ICB.0000000000000428	27652820					0			0				0	0		doi: 10.1097/ICB.0000000000000428	Lin J, Boudreault K, Tsang S., MULTIMODAL IMAGING AND ELECTRORETINOGRAPHY IN LONG-CHAIN 3-HYDROXYACYL COENZYME A DEHYDROGENASE DEFICIENCY. Retin Cases Brief Rep. 2017
2214	Dynamics of Inflammatory Factors in Aqueous Humor during Ranibizumab or Aflibercept Treatment for Age-Related Macular Degeneration.	Motohashi R, Noma H, Yasuda K, Kotake O, Goto H, Shimura M.	Ophthalmic Res. 2017;58(4):209-216. doi: 10.1159/000478705. Epub 2017 Aug 11.	Ophthalmic Res		2017			0.00814951		doi: 10.1159/000478705	28796997					0			0				0	0		doi: 10.1159/000478705	Motohashi R, Noma H, Yasuda K, Kotake O, Goto H, Shimura M., Dynamics of Inflammatory Factors in Aqueous Humor during Ranibizumab or Aflibercept Treatment for Age-Related Macular Degeneration. Ophthalmic Res. 2017
835	Comparison of hydrophobic and hydrophilic intraocular lens in preventing posterior capsule opacification after cataract surgery: An updated meta-analysis.	Zhao Y, Yang K, Li J, Huang Y, Zhu S.	Medicine (Baltimore). 2017 Nov;96(44):e8301. doi: 10.1097/MD.0000000000008301. Review.	Medicine (Baltimore)		2017			0.00821743		doi: 10.1097/MD.0000000000008301	29095259					0			0				0	0		doi: 10.1097/MD.0000000000008301	Zhao Y, Yang K, Li J, Huang Y, Zhu S., Comparison of hydrophobic and hydrophilic intraocular lens in preventing posterior capsule opacification after cataract surgery: An updated meta-analysis. Medicine (Baltimore). 2017
5557	Acquired pendular nystagmus.	Kang S, Shaikh AG.	J Neurol Sci. 2017 Apr 15;375:8-17. doi: 10.1016/j.jns.2017.01.033. Epub 2017 Jan 10. Review.	J Neurol Sci		2017			0.00822666		doi: 10.1016/j.jns.2017.01.033	28320194					0			0				0	0		doi: 10.1016/j.jns.2017.01.033	Kang S, Shaikh AG., Acquired pendular nystagmus. J Neurol Sci. 2017
4431	Evaluation of Horner Syndrome in the MRI Era.	Sadaka A, Schockman SL, Golnik KC.	J Neuroophthalmol. 2017 Sep;37(3):268-272. doi: 10.1097/WNO.0000000000000503.	J Neuroophthalmol		2017			0.00824877		doi: 10.1097/WNO.0000000000000503	28445191					0			0				0	0		doi: 10.1097/WNO.0000000000000503	Sadaka A, Schockman SL, Golnik KC., Evaluation of Horner Syndrome in the MRI Era. J Neuroophthalmol. 2017
5122	Impact of refractive error on quality of life: a qualitative study.	Kandel H, Khadka J, Goggin M, Pesudovs K.	Clin Exp Ophthalmol. 2017 Sep;45(7):677-688. doi: 10.1111/ceo.12954. Epub 2017 May 15.	Clin Exp Ophthalmol		2017			0.00828026		doi: 10.1111/ceo.12954	28370795					0			0				0	0		doi: 10.1111/ceo.12954	Kandel H, Khadka J, Goggin M, Pesudovs K., Impact of refractive error on quality of life: a qualitative study. Clin Exp Ophthalmol. 2017
4369	Fundus findings in a series of patients with extrapulmonary tuberculosis in Thailand.	Jirawison C, Liu Y, Surasit K, Maningding E, Kamphaengkham S, Ausayakhun S, Heiden D, Margolis TP, Gonzales JA, Acharya NR, Keenan JD.	Br J Ophthalmol. 2017 Jun;101(6):691-694. doi: 10.1136/bjophthalmol-2016-310105. Epub 2017 Apr 27.	Br J Ophthalmol		2017			0.00828964		doi: 10.1136/bjophthalmol-2016-310105	28450377					0			0				0	0		doi: 10.1136/bjophthalmol-2016-310105	Jirawison C, Liu Y, Surasit K, Maningding E, Kamphaengkham S, Ausayakhun S, Heiden D, Margolis TP, Gonzales JA, Acharya NR, Keenan JD., Fundus findings in a series of patients with extrapulmonary tuberculosis in Thailand. Br J Ophthalmol. 2017
2999	Labeled lines for image blur and contrast.	Morgan MJ.	J Vis. 2017 Jun 1;17(6):16. doi: 10.1167/17.6.16.	J Vis		2017			0.00829102		doi: 10.1167/17.6.16	28654961					0			0				0	0		doi: 10.1167/17.6.16	Morgan MJ., Labeled lines for image blur and contrast. J Vis. 2017
7989	State-dependent modulation of functional connectivity in early blind individuals.	Pelland M, Orban P, Dansereau C, Lepore F, Bellec P, Collignon O.	Neuroimage. 2017 Feb 15;147:532-541. doi: 10.1016/j.neuroimage.2016.12.053. Epub 2016 Dec 21.	Neuroimage		2017			0.00858813		doi: 10.1016/j.neuroimage.2016.12.053	28011254					0			0				0	0		doi: 10.1016/j.neuroimage.2016.12.053	Pelland M, Orban P, Dansereau C, Lepore F, Bellec P, Collignon O., State-dependent modulation of functional connectivity in early blind individuals. Neuroimage. 2017
6493	Spontaneous Canalicular Plug Erosion After Punctal Plug Placement.	Zhang X, Bitar M, Davis RM.	Cornea. 2017 Apr;36(4):521-522. doi: 10.1097/ICO.0000000000001130.	Cornea		2017			0.00870398		doi: 10.1097/ICO.0000000000001130	28207432					0			0				0	0		doi: 10.1097/ICO.0000000000001130	Zhang X, Bitar M, Davis RM., Spontaneous Canalicular Plug Erosion After Punctal Plug Placement. Cornea. 2017
752	Optical Coherence Tomography Findings in Endogenous Fungal Chorioretinitis, Retinitis, and Endophthalmitis.	Stephens JD, Adam MK, Todorich B, Faia LJ, Garg S, Dunn JP, Mehta S.	Ophthalmic Surg Lasers Imaging Retina. 2017 Nov 1;48(11):894-901. doi: 10.3928/23258160-20171030-04.	Ophthalmic Surg Lasers Imaging Retina		2017			0.00882352		doi: 10.3928/23258160-20171030-04	29121358					0			0				0	0		doi: 10.3928/23258160-20171030-04	Stephens JD, Adam MK, Todorich B, Faia LJ, Garg S, Dunn JP, Mehta S., Optical Coherence Tomography Findings in Endogenous Fungal Chorioretinitis, Retinitis, and Endophthalmitis. Ophthalmic Surg Lasers Imaging Retina. 2017
7295	Better Visual Outcome by Intraocular Lens Ejection in Geriatric Patients with Ruptured Ocular Injuries.	Kaneko H, Asami T, Sugita T, Tsunekawa T, Matsuura T, Takayama K, Yamamoto K, Kachi S, Ito Y, Ueno S, Nonobe N, Kataoka K, Suzumura A, Iwase T, Terasaki H.	PLoS One. 2017 Jan 20;12(1):e0170094. doi: 10.1371/journal.pone.0170094. eCollection 2017.	PLoS One		2017			0.00894085		doi: 10.1371/journal.pone.0170094	28107485					0			0				0	0		doi: 10.1371/journal.pone.0170094	Kaneko H, Asami T, Sugita T, Tsunekawa T, Matsuura T, Takayama K, Yamamoto K, Kachi S, Ito Y, Ueno S, Nonobe N, Kataoka K, Suzumura A, Iwase T, Terasaki H., Better Visual Outcome by Intraocular Lens Ejection in Geriatric Patients with Ruptured Ocular Injuries. PLoS One. 2017
10260	Floppy Eyelid Syndrome and Its Determinants in Iranian Adults: A Population-Based Study.	Hashemi H, Rastad H, Emamian MH, Fotouhi A.	Eye Contact Lens. 2017 Nov;43(6):406-410. doi: 10.1097/ICL.0000000000000297.	Eye Contact Lens		2017			0.00898739		doi: 10.1097/ICL.0000000000000297	27415581					0			0				0	0		doi: 10.1097/ICL.0000000000000297	Hashemi H, Rastad H, Emamian MH, Fotouhi A., Floppy Eyelid Syndrome and Its Determinants in Iranian Adults: A Population-Based Study. Eye Contact Lens. 2017
7670	Rescue of mutant rhodopsin traffic by metformin-induced AMPK activation accelerates photoreceptor degeneration.	Athanasiou D, Aguila M, Opefi CA, South K, Bellingham J, Bevilacqua D, Munro PM, Kanuga N, Mackenzie FE, Dubis AM, Georgiadis A, Graca AB, Pearson RA, Ali RR, Sakami S, Palczewski K, Sherman MY, Reeves PJ, Cheetham ME.	Hum Mol Genet. 2017 Jan 15;26(2):305-319. doi: 10.1093/hmg/ddw387.	Hum Mol Genet		2017			0.00901402		doi: 10.1093/hmg/ddw387	28065882					0			0				0	0		doi: 10.1093/hmg/ddw387	Athanasiou D, Aguila M, Opefi CA, South K, Bellingham J, Bevilacqua D, Munro PM, Kanuga N, Mackenzie FE, Dubis AM, Georgiadis A, Graca AB, Pearson RA, Ali RR, Sakami S, Palczewski K, Sherman MY, Reeves PJ, Cheetham ME., Rescue of mutant rhodopsin traffic by metformin-induced AMPK activation accelerates photoreceptor degeneration. Hum Mol Genet. 2017
4724	Identifying Personal Risk Factors for Falls in the Workplace.	Lurati AR.	Workplace Health Saf. 2017 Jun;65(6):236-239. doi: 10.1177/2165079916686592. Epub 2017 Apr 17.	Workplace Health Saf		2017			0.00921162		doi: 10.1177/2165079916686592	28414580					0			0				0	0		doi: 10.1177/2165079916686592	Lurati AR., Identifying Personal Risk Factors for Falls in the Workplace. Workplace Health Saf. 2017
2328	Bruch´s membrane thickness in relationship to axial length.	Bai HX, Mao Y, Shen L, Xu XL, Gao F, Zhang ZB, Li B, Jonas JB.	PLoS One. 2017 Aug 2;12(8):e0182080. doi: 10.1371/journal.pone.0182080. eCollection 2017.	PLoS One		2017			0.00925621		doi: 10.1371/journal.pone.0182080	28767664					0			0				0	0		doi: 10.1371/journal.pone.0182080	Bai HX, Mao Y, Shen L, Xu XL, Gao F, Zhang ZB, Li B, Jonas JB., Bruch´s membrane thickness in relationship to axial length. PLoS One. 2017
9913	Sweet's syndrome-like eruption in association with the exacerbation of Behçet's disease after the Great East Japan Earthquake.	Miura T, Ohtsuka M, Yamamoto T.	Actas Dermosifiliogr. 2017 Jan - Feb;108(1):70-72. doi: 10.1016/j.ad.2016.07.006. Epub 2016 Aug 16. English, Spanish. No abstract available.	Actas Dermosifiliogr		2017			0.00942467		doi: 10.1016/j.ad.2016.07.006	27543190					0			0				0	0		doi: 10.1016/j.ad.2016.07.006	Miura T, Ohtsuka M, Yamamoto T., Sweet's syndrome-like eruption in association with the exacerbation of Behçet's disease after the Great East Japan Earthquake. Actas Dermosifiliogr. 2017
4197	Association Between Thyroid Disease and Uveitis: Results From the Pacific Ocular Inflammation Study.	Borkar DS, Homayounfar G, Tham VM, Ray KJ, Vinoya AC, Uchida A, Acharya NR.	JAMA Ophthalmol. 2017 Jun 1;135(6):594-599. doi: 10.1001/jamaophthalmol.2017.1009.	JAMA Ophthalmol		2017			0.00953838		doi: 10.1001/jamaophthalmol.2017.1009	28472213					0			0				0	0		doi: 10.1001/jamaophthalmol.2017.1009	Borkar DS, Homayounfar G, Tham VM, Ray KJ, Vinoya AC, Uchida A, Acharya NR., Association Between Thyroid Disease and Uveitis: Results From the Pacific Ocular Inflammation Study. JAMA Ophthalmol. 2017
8605	Studies using concentric ring bifocal and peripheral add multifocal contact lenses to slow myopia progression in school-aged children: a meta-analysis.	Li SM, Kang MT, Wu SS, Meng B, Sun YY, Wei SF, Liu L, Peng X, Chen Z, Zhang F, Wang N.	Ophthalmic Physiol Opt. 2017 Jan;37(1):51-59. doi: 10.1111/opo.12332. Epub 2016 Nov 23. Review.	Ophthalmic Physiol Opt		2017			0.00959426		doi: 10.1111/opo.12332	27880992					0			0				0	0		doi: 10.1111/opo.12332	Li SM, Kang MT, Wu SS, Meng B, Sun YY, Wei SF, Liu L, Peng X, Chen Z, Zhang F, Wang N., Studies using concentric ring bifocal and peripheral add multifocal contact lenses to slow myopia progression in school-aged children: a meta-analysis. Ophthalmic Physiol Opt. 2017
3116	Localized Bilateral Juxtafoveal Photoreceptor Loss in POEMS: A New Association.	Hwang CK, Kolomeyer AM, Brucker AJ, Morgan JIW, Nichols CW, Aleman TS.	Retina. 2017 Jul;37(7):e91-e92. doi: 10.1097/IAE.0000000000001666. No abstract available.	Retina		2017			0.00971522		doi: 10.1097/IAE.0000000000001666	28633154					0			0				0	0		doi: 10.1097/IAE.0000000000001666	Hwang CK, Kolomeyer AM, Brucker AJ, Morgan JIW, Nichols CW, Aleman TS., Localized Bilateral Juxtafoveal Photoreceptor Loss in POEMS: A New Association. Retina. 2017
3118	Incidence and Characteristics of Congenital Cataract Surgery in France from 2010 to 2012: The EPISAFE Program.	Daien V, Le Pape A, Heve D, Villain M, Bremond Gignac D; Collaborators of the Epidemiology and Safety Program (EPISAFE)..	Ophthalmic Res. 2017;58(2):114-116. doi: 10.1159/000473701. Epub 2017 Jun 20.	Ophthalmic Res		2017			0.00972674		doi: 10.1159/000473701	28633137					0			0				0	0		doi: 10.1159/000473701	Daien V, Le Pape A, Heve D, Villain M, Bremond Gignac D; Collaborators of the Epidemiology and Safety Program (EPISAFE).., Incidence and Characteristics of Congenital Cataract Surgery in France from 2010 to 2012: The EPISAFE Program. Ophthalmic Res. 2017
5151	The Penumbra Obscura Stimulates Iris Neovascularisation after Isolated Central Retinal Artery Occlusion.	McLeod D.	Korean J Ophthalmol. 2017 Apr;31(2):177-179. doi: 10.3341/kjo.2017.31.2.177. Epub 2017 Mar 21. No abstract available.	Korean J Ophthalmol		2017			0.00976076		doi: 10.3341/kjo.2017.31.2.177	28367049					0			0				0	0		doi: 10.3341/kjo.2017.31.2.177	McLeod D., The Penumbra Obscura Stimulates Iris Neovascularisation after Isolated Central Retinal Artery Occlusion. Korean J Ophthalmol. 2017
3785	GLP-1R as a Target for the Treatment of Diabetic Retinopathy: Friend or Foe?	Simó R, Hernández C.	Diabetes. 2017 Jun;66(6):1453-1460. doi: 10.2337/db16-1364. Review.	Diabetes		2017			0.00985055		doi: 10.2337/db16-1364	28533296					0			0				0	0		doi: 10.2337/db16-1364	Simó R, Hernández C., GLP-1R as a Target for the Treatment of Diabetic Retinopathy: Friend or Foe? Diabetes. 2017
8573	Gamma Knife Radiosurgery for Uveal Metastases: Report of Three Cases and a Review of the Literature.	Ares WJ, Tonetti D, Yu JY, Monaco EA, Flickinger JC, Lunsford LD.	Am J Ophthalmol. 2017 Feb;174:169-174. doi: 10.1016/j.ajo.2016.11.009. Epub 2016 Nov 23. Review.	Am J Ophthalmol		2017			0.00986216		doi: 10.1016/j.ajo.2016.11.009	27889503					0			0				0	0		doi: 10.1016/j.ajo.2016.11.009	Ares WJ, Tonetti D, Yu JY, Monaco EA, Flickinger JC, Lunsford LD., Gamma Knife Radiosurgery for Uveal Metastases: Report of Three Cases and a Review of the Literature. Am J Ophthalmol. 2017
6704	Does early response to intravenous glucocorticoids predict the final outcome in patients with moderate-to-severe and active Graves' orbitopathy?	Bartalena L, Veronesi G, Krassas GE, Wiersinga WM, Marcocci C, Marinò M, Salvi M, Daumerie C, Bournaud C, Stahl M, Sassi L, Azzolini C, Boboridis KG, Mourits MP, Soeters MR, Baldeschi L, Nardi M, Currò N, Boschi A, Bernard M, von Arx G, Perros P, et al.	J Endocrinol Invest. 2017 May;40(5):547-553. doi: 10.1007/s40618-017-0608-z. Epub 2017 Feb 7.	J Endocrinol Invest		2017			0.0099683		doi: 10.1007/s40618-017-0608-z	28176220					0			0				0	0		doi: 10.1007/s40618-017-0608-z	Bartalena L, Veronesi G, Krassas GE, Wiersinga WM, Marcocci C, Marinò M, Salvi M, Daumerie C, Bournaud C, Stahl M, Sassi L, Azzolini C, Boboridis KG, Mourits MP, Soeters MR, Baldeschi L, Nardi M, Currò N, Boschi A, Bernard M, von Arx G, Perros P, et al., Does early response to intravenous glucocorticoids predict the final outcome in patients with moderate-to-severe and active Graves' orbitopathy?…
1831	Neuromyelitis optica, atypical hemophagocytic lymphohistiocytosis and heterozygous perforin A91V mutation.	Palterer B, Brugnolo F, Sieni E, Barilaro A, Parronchi P.	J Neuroimmunol. 2017 Oct 15;311:10-13. doi: 10.1016/j.jneuroim.2017.08.003. Epub 2017 Aug 15.	J Neuroimmunol		2017			0.0100513		doi: 10.1016/j.jneuroim.2017.08.003	28863861					0			0				0	0		doi: 10.1016/j.jneuroim.2017.08.003	Palterer B, Brugnolo F, Sieni E, Barilaro A, Parronchi P., Neuromyelitis optica, atypical hemophagocytic lymphohistiocytosis and heterozygous perforin A91V mutation. J Neuroimmunol. 2017
7348	Brachial artery pseudoaneurysm: Rare finding in childhood Behcet's disease.	Demircioğlu Kılıc B, Akbalık Kara M, Ozcelik AA, Ustunsoy H, Balat A.	Pediatr Int. 2017 Jan;59(1):109-110. doi: 10.1111/ped.13149. No abstract available.	Pediatr Int		2017			0.0101362		doi: 10.1111/ped.13149	28102627					0			0				0	0		doi: 10.1111/ped.13149	Demircioğlu Kılıc B, Akbalık Kara M, Ozcelik AA, Ustunsoy H, Balat A., Brachial artery pseudoaneurysm: Rare finding in childhood Behcet's disease. Pediatr Int. 2017
8464	The enlarged extraocular muscle: to relax, reflect or refer?	Shafi F, Mathewson P, Mehta P, Ahluwalia HS.	Eye (Lond). 2017 Apr;31(4):537-544. doi: 10.1038/eye.2016.248. Epub 2016 Dec 2.	Eye (Lond)		2017			0.0101563		doi: 10.1038/eye.2016.248	27911447					0			0				0	0		doi: 10.1038/eye.2016.248	Shafi F, Mathewson P, Mehta P, Ahluwalia HS., The enlarged extraocular muscle: to relax, reflect or refer? Eye (Lond). 2017
2299	Acute uveal effusion during phacoemulsification with preoperative central serous chorioretinopathy: a case report.	Chang R, Du Y, Peng Z, Lu Y, Zhu X.	BMC Ophthalmol. 2017 Aug 3;17(1):137. doi: 10.1186/s12886-017-0530-3.	BMC Ophthalmol		2017			0.0103486		doi: 10.1186/s12886-017-0530-3	28774289					0			0				0	0		doi: 10.1186/s12886-017-0530-3	Chang R, Du Y, Peng Z, Lu Y, Zhu X., Acute uveal effusion during phacoemulsification with preoperative central serous chorioretinopathy: a case report. BMC Ophthalmol. 2017
4766	Long-Term Maintenance of Executive-Related Oculomotor Improvements in Older Adults with Self-Reported Cognitive Complaints Following a 24-Week Multiple Modality Exercise Program.	Shellington EM, Heath M, Gill DP, Petrella RJ.	J Alzheimers Dis. 2017;58(1):17-22. doi: 10.3233/JAD-161190.	J Alzheimers Dis		2017			0.0105011		doi: 10.3233/JAD-161190	28409744					0			0				0	0		doi: 10.3233/JAD-161190	Shellington EM, Heath M, Gill DP, Petrella RJ., Long-Term Maintenance of Executive-Related Oculomotor Improvements in Older Adults with Self-Reported Cognitive Complaints Following a 24-Week Multiple Modality Exercise Program. J Alzheimers Dis. 2017
6588	MiR-346 and TRAb as Predicative Factors for Relapse in Graves' Disease Within One Year.	Li J, Cai Y, Sun X, Yao D, Xia J.	Horm Metab Res. 2017 Mar;49(3):180-184. doi: 10.1055/s-0043-100116. Epub 2017 Feb 13.	Horm Metab Res		2017			0.010682		doi: 10.1055/s-0043-100116	28192819					0			0				0	0		doi: 10.1055/s-0043-100116	Li J, Cai Y, Sun X, Yao D, Xia J., MiR-346 and TRAb as Predicative Factors for Relapse in Graves' Disease Within One Year. Horm Metab Res. 2017
7733	Herpes Simplex Virus Keratitis and Resistance to Acyclovir.	Farooq AV.	Cornea. 2017 Feb;36(2):e4-e5. doi: 10.1097/ICO.0000000000001100. No abstract available.	Cornea		2017			0.0107812		doi: 10.1097/ICO.0000000000001100	28060081					0			0				0	0		doi: 10.1097/ICO.0000000000001100	Farooq AV., Herpes Simplex Virus Keratitis and Resistance to Acyclovir. Cornea. 2017
1634	A Novel Approach to the Differentiation of Intrabulbar Tumors in Color Doppler Imaging.	Modrzejewska M, Wiącek MP.	Curr Eye Res. 2017 Nov;42(11):1482-1490. doi: 10.1080/02713683.2017.1341534. Epub 2017 Sep 14.	Curr Eye Res		2017			0.0110343		doi: 10.1080/02713683.2017.1341534	28910160					0			0				0	0		doi: 10.1080/02713683.2017.1341534	Modrzejewska M, Wiącek MP., A Novel Approach to the Differentiation of Intrabulbar Tumors in Color Doppler Imaging. Curr Eye Res. 2017
5758	Analysis of an international collaboration for capacity building of human resources for eye care: case study of the college-college VISION 2020 LINK.	Mwangi N, Zondervan M, Bascaran C.	Hum Resour Health. 2017 Mar 14;15(1):22. doi: 10.1186/s12960-017-0196-1.	Hum Resour Health		2017			0.0112279		doi: 10.1186/s12960-017-0196-1	28288650					0			0				0	0		doi: 10.1186/s12960-017-0196-1	Mwangi N, Zondervan M, Bascaran C., Analysis of an international collaboration for capacity building of human resources for eye care: case study of the college-college VISION 2020 LINK. Hum Resour Health. 2017
7616	Standing Up for Scope.	Berlin J.	Tex Med. 2017 Jan 1;113(1):33-39.	Tex Med		2017			0.0114463		#VALUE!	28072895					0			0				0	0		#VALUE!	Berlin J., Standing Up for Scope. Tex Med. 2017
3216	Dynamic accommodation without feedback does not respond to isolated blur cues.	Esteve-Taboada JJ, Del Águila-Carrasco AJ, Bernal-Molina P, López-Gil N, Montés-Micó R, Kruger P, Marín-Franch I.	Vision Res. 2017 Jul;136:50-56. doi: 10.1016/j.visres.2017.05.007. Epub 2017 Jun 21.	Vision Res		2017			0.0114788		doi: 10.1016/j.visres.2017.05.007	28619515					0			0				0	0		doi: 10.1016/j.visres.2017.05.007	Esteve-Taboada JJ, Del Águila-Carrasco AJ, Bernal-Molina P, López-Gil N, Montés-Micó R, Kruger P, Marín-Franch I., Dynamic accommodation without feedback does not respond to isolated blur cues. Vision Res. 2017
1484	Evaluation of retinal blood flow before and after panretinal photocoagulation using pattern scan laser for diabetic retinopathy.	Yamada Y, Suzuma K, Onizuka N, Uematsu M, Mohamed YH, Kitaoka T.	Curr Eye Res. 2017 Dec;42(12):1707-1712. doi: 10.1080/02713683.2017.1358373. Epub 2017 Sep 22.	Curr Eye Res		2017			0.0115477		doi: 10.1080/02713683.2017.1358373	28937857					0			0				0	0		doi: 10.1080/02713683.2017.1358373	Yamada Y, Suzuma K, Onizuka N, Uematsu M, Mohamed YH, Kitaoka T., Evaluation of retinal blood flow before and after panretinal photocoagulation using pattern scan laser for diabetic retinopathy. Curr Eye Res. 2017
6834	LRRK2(I2020T) functional genetic interactors that modify eye degeneration and dopaminergic cell loss in Drosophila.	Marcogliese PC, Abuaish S, Kabbach G, Abdel-Messih E, Seang S, Li G, Slack RS, Haque ME, Venderova K, Park DS.	Hum Mol Genet. 2017 Apr 1;26(7):1247-1257. doi: 10.1093/hmg/ddx030.	Hum Mol Genet		2017			0.0115478		doi: 10.1093/hmg/ddx030	28158614					0			0				0	0		doi: 10.1093/hmg/ddx030	Marcogliese PC, Abuaish S, Kabbach G, Abdel-Messih E, Seang S, Li G, Slack RS, Haque ME, Venderova K, Park DS., LRRK2(I2020T) functional genetic interactors that modify eye degeneration and dopaminergic cell loss in Drosophila. Hum Mol Genet. 2017
2128	Transgenic Mice Over-Expressing RBP4 Have RBP4-Dependent and Light-Independent Retinal Degeneration.	Du M, Phelps E, Balangue MJ, Dockins A, Moiseyev G, Shin Y, Kane S, Otalora L, Ma JX, Farjo R, Farjo KM.	Invest Ophthalmol Vis Sci. 2017 Aug 1;58(10):4375–4383. doi: 10.1167/iovs.17-22107. Erratum in: Invest Ophthalmol Vis Sci. 2017 Sep 1;58(11):4799.	Invest Ophthalmol Vis Sci		2017			0.0115857		doi: 10.1167/iovs.17-22107	28813718					0			0				0	0		doi: 10.1167/iovs.17-22107	Du M, Phelps E, Balangue MJ, Dockins A, Moiseyev G, Shin Y, Kane S, Otalora L, Ma JX, Farjo R, Farjo KM., Transgenic Mice Over-Expressing RBP4 Have RBP4-Dependent and Light-Independent Retinal Degeneration. Invest Ophthalmol Vis Sci. 2017
10406	Etiology and Management of Allergic Eyelid Dermatitis.	Chisholm SAM, Couch SM, Custer PL.	Ophthal Plast Reconstr Surg. 2017 Jul/Aug;33(4):248-250. doi: 10.1097/IOP.0000000000000723.	Ophthal Plast Reconstr Surg		2017			0.0116702		doi: 10.1097/IOP.0000000000000723	27333449					0			0				0	0		doi: 10.1097/IOP.0000000000000723	Chisholm SAM, Couch SM, Custer PL., Etiology and Management of Allergic Eyelid Dermatitis. Ophthal Plast Reconstr Surg. 2017
7560	Acute necrotizing retinal vasculitis as onset of systemic lupus erythematosus: A case report.	Monov S, Hristova R, Dacheva R, Toncheva R, Shumnalieva R, Shoumnalieva-Ivanova V, Monova D.	Medicine (Baltimore). 2017 Jan;96(2):e5754. doi: 10.1097/MD.0000000000005754.	Medicine (Baltimore)		2017			0.0117317		doi: 10.1097/MD.0000000000005754	28079801					0			0				0	0		doi: 10.1097/MD.0000000000005754	Monov S, Hristova R, Dacheva R, Toncheva R, Shumnalieva R, Shoumnalieva-Ivanova V, Monova D., Acute necrotizing retinal vasculitis as onset of systemic lupus erythematosus: A case report. Medicine (Baltimore). 2017
9168	Neuroprosthetics in amputee and brain injury rehabilitation.	Eapen BC, Murphy DP, Cifu DX.	Exp Neurol. 2017 Jan;287(Pt 4):479-485. doi: 10.1016/j.expneurol.2016.08.004. Epub 2016 Aug 9. Review.	Exp Neurol		2017			0.0117375		doi: 10.1016/j.expneurol.2016.08.004	27519275					0			0				0	0		doi: 10.1016/j.expneurol.2016.08.004	Eapen BC, Murphy DP, Cifu DX., Neuroprosthetics in amputee and brain injury rehabilitation. Exp Neurol. 2017
7187	miRNA-200c and miRNA-141 as potential prognostic biomarkers and regulators of epithelial-mesenchymal transition in eyelid sebaceous gland carcinoma.	Bhardwaj M, Sen S, Chosdol K, Sharma A, Pushker N, Kashyap S, Bakhshi S, Bajaj MS.	Br J Ophthalmol. 2017 Apr;101(4):536-542. doi: 10.1136/bjophthalmol-2016-309460. Epub 2017 Jan 24.	Br J Ophthalmol		2017			0.011757		doi: 10.1136/bjophthalmol-2016-309460	28119291					0			0				0	0		doi: 10.1136/bjophthalmol-2016-309460	Bhardwaj M, Sen S, Chosdol K, Sharma A, Pushker N, Kashyap S, Bakhshi S, Bajaj MS., miRNA-200c and miRNA-141 as potential prognostic biomarkers and regulators of epithelial-mesenchymal transition in eyelid sebaceous gland carcinoma. Br J Ophthalmol. 2017
3326	Pattern of ocular involvement in myasthenia gravis with MuSK antibodies.	Evoli A, Alboini PE, Iorio R, Damato V, Bartoccioni E.	J Neurol Neurosurg Psychiatry. 2017 Sep;88(9):761-763. doi: 10.1136/jnnp-2017-315782. Epub 2017 Jun 10.	J Neurol Neurosurg Psychiatry		2017			0.0119143		doi: 10.1136/jnnp-2017-315782	28601810					0			0				0	0		doi: 10.1136/jnnp-2017-315782	Evoli A, Alboini PE, Iorio R, Damato V, Bartoccioni E., Pattern of ocular involvement in myasthenia gravis with MuSK antibodies. J Neurol Neurosurg Psychiatry. 2017
3894	Inferior Oblique Overaction: Anterior Transposition Versus Myectomy.	Rajavi Z, Feizi M, Behradfar N, Yaseri M, Sayanjali S, Motevaseli T, Sabbaghi H, Faghihi M.	J Pediatr Ophthalmol Strabismus. 2017 Jul 1;54(4):232-237. doi: 10.3928/01913913-20170309-01. Epub 2017 May 17.	J Pediatr Ophthalmol Strabismus		2017			0.0119739		doi: 10.3928/01913913-20170309-01	28510770					0			0				0	0		doi: 10.3928/01913913-20170309-01	Rajavi Z, Feizi M, Behradfar N, Yaseri M, Sayanjali S, Motevaseli T, Sabbaghi H, Faghihi M., Inferior Oblique Overaction: Anterior Transposition Versus Myectomy. J Pediatr Ophthalmol Strabismus. 2017
8429	Imaging of macrophage dynamics with optical coherence tomography in anterior ischemic optic neuropathy.	Kokona D, Häner NU, Ebneter A, Zinkernagel MS.	Exp Eye Res. 2017 Jan;154:159-167. doi: 10.1016/j.exer.2016.11.020. Epub 2016 Nov 30.	Exp Eye Res		2017			0.0119914		doi: 10.1016/j.exer.2016.11.020	27914988					0			0				0	0		doi: 10.1016/j.exer.2016.11.020	Kokona D, Häner NU, Ebneter A, Zinkernagel MS., Imaging of macrophage dynamics with optical coherence tomography in anterior ischemic optic neuropathy. Exp Eye Res. 2017
4817	Correlations Between MMPs and TIMPs Levels in Aqueous Humor from High Myopia and Cataract Patients.	Jia Y, Hu DN, Sun J, Zhou J.	Curr Eye Res. 2017 Apr;42(4):600-603. doi: 10.1080/02713683.2016.1223317. Epub 2016 Oct 19.	Curr Eye Res		2017			0.0120626		doi: 10.1080/02713683.2016.1223317	28402202					0			0				0	0		doi: 10.1080/02713683.2016.1223317	Jia Y, Hu DN, Sun J, Zhou J., Correlations Between MMPs and TIMPs Levels in Aqueous Humor from High Myopia and Cataract Patients. Curr Eye Res. 2017
11049	Osteolytic Sarcoidosis of the Orbital Roof Masquerading as a Malignant Orbital Lesion.	Cole SC, Eftekhari K, Oberg T, Mamalis N, Anderson RL.	Ophthal Plast Reconstr Surg. 2017 May/Jun;33(3S Suppl 1):S94-S96. doi: 10.1097/IOP.0000000000000536.	Ophthal Plast Reconstr Surg		2017			0.0121246		doi: 10.1097/IOP.0000000000000536	26226236					0			0				0	0		doi: 10.1097/IOP.0000000000000536	Cole SC, Eftekhari K, Oberg T, Mamalis N, Anderson RL., Osteolytic Sarcoidosis of the Orbital Roof Masquerading as a Malignant Orbital Lesion. Ophthal Plast Reconstr Surg. 2017
10973	The role of early visual input in the development of contour interpolation: the case of subjective contours.	Hadad BS, Maurer D, Lewis TL.	Dev Sci. 2017 May;20(3). doi: 10.1111/desc.12379. Epub 2016 Jan 6.	Dev Sci		2017			0.0121248		doi: 10.1111/desc.12379	26743221					0			0				0	0		doi: 10.1111/desc.12379	Hadad BS, Maurer D, Lewis TL., The role of early visual input in the development of contour interpolation: the case of subjective contours. Dev Sci. 2017
6139	Ischemic Optic Neuropathy in Cardiac Surgery: Incidence and Risk Factors in the United States from the National Inpatient Sample 1998 to 2013.	Rubin DS, Matsumoto MM, Moss HE, Joslin CE, Tung A, Roth S.	Anesthesiology. 2017 May;126(5):810-821. doi: 10.1097/ALN.0000000000001533.	Anesthesiology		2017			0.0122302		doi: 10.1097/ALN.0000000000001533	28244936					0			0				0	0		doi: 10.1097/ALN.0000000000001533	Rubin DS, Matsumoto MM, Moss HE, Joslin CE, Tung A, Roth S., Ischemic Optic Neuropathy in Cardiac Surgery: Incidence and Risk Factors in the United States from the National Inpatient Sample 1998 to 2013. Anesthesiology. 2017
8142	Comparison of the clinical efficacy of preserved and preservative-free hydroxypropyl methylcellulose-dextran-containing eyedrops.	Safarzadeh M, Azizzadeh P, Akbarshahi P.	J Optom. 2017 Oct - Dec;10(4):258-264. doi: 10.1016/j.optom.2016.11.002. Epub 2016 Dec 15.	J Optom		2017			0.0124318		doi: 10.1016/j.optom.2016.11.002	27989693					0			0				0	0		doi: 10.1016/j.optom.2016.11.002	Safarzadeh M, Azizzadeh P, Akbarshahi P., Comparison of the clinical efficacy of preserved and preservative-free hydroxypropyl methylcellulose-dextran-containing eyedrops. J Optom. 2017
10743	A new familial case of Jalili syndrome caused by a novel mutation in CNNM4.	Topçu V, Alp MY, Alp CK, Bakır A, Geylan D, Yılmazoğlu MÖ.	Ophthalmic Genet. 2017 Mar-Apr;38(2):161-166. doi: 10.3109/13816810.2016.1164192. Epub 2016 Apr 12.	Ophthalmic Genet		2017			0.0125001		doi: 10.3109/13816810.2016.1164192	27070327					0			0				0	0		doi: 10.3109/13816810.2016.1164192	Topçu V, Alp MY, Alp CK, Bakır A, Geylan D, Yılmazoğlu MÖ., A new familial case of Jalili syndrome caused by a novel mutation in CNNM4. Ophthalmic Genet. 2017
8340	A Revised Approach for the Detection of Sight-Threatening Diabetic Macular Edema.	Litvin TV, Bresnick GH, Cuadros JA, Selvin S, Kanai K, Ozawa GY.	JAMA Ophthalmol. 2017 Jan 1;135(1):62-68. doi: 10.1001/jamaophthalmol.2016.4772.	JAMA Ophthalmol		2017			0.0125648		doi: 10.1001/jamaophthalmol.2016.4772	27930756					0			0				0	0		doi: 10.1001/jamaophthalmol.2016.4772	Litvin TV, Bresnick GH, Cuadros JA, Selvin S, Kanai K, Ozawa GY., A Revised Approach for the Detection of Sight-Threatening Diabetic Macular Edema. JAMA Ophthalmol. 2017
946	The Pathophysiology of Dry Eye Disease: What We Know and Future Directions for Research.	Pflugfelder SC, de Paiva CS.	Ophthalmology. 2017 Nov;124(11S):S4-S13. doi: 10.1016/j.ophtha.2017.07.010. Review.	Ophthalmology		2017			0.01264		doi: 10.1016/j.ophtha.2017.07.010	29055361					0			0				0	0		doi: 10.1016/j.ophtha.2017.07.010	Pflugfelder SC, de Paiva CS., The Pathophysiology of Dry Eye Disease: What We Know and Future Directions for Research. Ophthalmology. 2017
9707	Dock3-NMDA receptor interaction as a target for glaucoma therapy.	Kimura A, Namekata K, Guo X, Harada C, Harada T.	Histol Histopathol. 2017 Mar;32(3):215-221. doi: 10.14670/HH-11-820. Epub 2016 Sep 9. Review.	Histol Histopathol		2017			0.01265		doi: 10.14670/HH-11-820	27615513					0			0				0	0		doi: 10.14670/HH-11-820	Kimura A, Namekata K, Guo X, Harada C, Harada T., Dock3-NMDA receptor interaction as a target for glaucoma therapy. Histol Histopathol. 2017
5214	Ensuring the timely supply and management of medicines for preventive chemotherapy against neglected tropical diseases.	[No authors listed]	Wkly Epidemiol Rec. 2017 Mar 31;92(13):155-64. English, French. No abstract available.	Wkly Epidemiol Rec		2017			0.012688		#VALUE!	28361529					0			0				0	0		#VALUE!	[No authors listed], Ensuring the timely supply and management of medicines for preventive chemotherapy against neglected tropical diseases. Wkly Epidemiol Rec. 2017
3936	Scaffolding the Communication of People With Congenital Deafblindness: An Analysis of Sequential Interaction Patterns.	Damen S, Janssen MJ, Ruijssenaars WA, Schuengel C.	Am Ann Deaf. 2017;162(1):24-33. doi: 10.1353/aad.2017.0012. Erratum in: Am Ann Deaf. 2017;162(4):380.	Am Ann Deaf		2017			0.0127219		doi: 10.1353/aad.2017.0012	28502913					0			0				0	0		doi: 10.1353/aad.2017.0012	Damen S, Janssen MJ, Ruijssenaars WA, Schuengel C., Scaffolding the Communication of People With Congenital Deafblindness: An Analysis of Sequential Interaction Patterns. Am Ann Deaf. 2017
8398	Relationship between physician-adjudicated adverse events and patient-reported health-related quality of life in a phase II clinical trial (NCT01143402) of patients with metastatic uveal melanoma.	Atkinson TM, Hay JL, Shoushtari A, Li Y, Paucar DJ, Smith SC, Kudchadkar RR, Doyle A, Sosman JA, Quevedo JF, Milhem MM, Joshua AM, Linette GP, Gajewski TF, Lutzky J, Lawson DH, Lao CD, Flynn PJ, Albertini MR, Sato T, Lewis K, Marr B, et al.	J Cancer Res Clin Oncol. 2017 Mar;143(3):439-445. doi: 10.1007/s00432-016-2318-x. Epub 2016 Dec 5.	J Cancer Res Clin Oncol		2017			0.0129168		doi: 10.1007/s00432-016-2318-x	27921276					0			0				0	0		doi: 10.1007/s00432-016-2318-x	Atkinson TM, Hay JL, Shoushtari A, Li Y, Paucar DJ, Smith SC, Kudchadkar RR, Doyle A, Sosman JA, Quevedo JF, Milhem MM, Joshua AM, Linette GP, Gajewski TF, Lutzky J, Lawson DH, Lao CD, Flynn PJ, Albertini MR, Sato T, Lewis K, Marr B, et al., Relationship between physician-adjudicated adverse events and patient-reported health-related quality of life in a phase II clinical trial (NCT01143402) of p…
10535	Unilateral persistent fetal vasculature coexisting with anterior segment dysgenesia.	Cañizares B, Yago I, Piñero Á, Ruiz M.	Arch Soc Esp Oftalmol. 2017 Jan;92(1):40-43. doi: 10.1016/j.oftal.2016.03.021. Epub 2016 May 24. English, Spanish.	Arch Soc Esp Oftalmol		2017			0.0129627		doi: 10.1016/j.oftal.2016.03.021	27230591					0			0				0	0		doi: 10.1016/j.oftal.2016.03.021	Cañizares B, Yago I, Piñero Á, Ruiz M., Unilateral persistent fetal vasculature coexisting with anterior segment dysgenesia. Arch Soc Esp Oftalmol. 2017
7184	Correlation of HLA-DQ and TNF-α gene polymorphisms with ocular myasthenia gravis combined with thyroid-associated ophthalmopathy.	Yang HW, Wang YX, Bao J, Wang SH, Lei P, Sun ZL.	Biosci Rep. 2017 Mar 27;37(2). pii: BSR20160440. doi: 10.1042/BSR20160440. Print 2017 Apr 28.	Biosci Rep		2017			0.0132028		doi: 10.1042/BSR20160440	28119492					0			0				0	0		doi: 10.1042/BSR20160440	Yang HW, Wang YX, Bao J, Wang SH, Lei P, Sun ZL., Correlation of HLA-DQ and TNF-α gene polymorphisms with ocular myasthenia gravis combined with thyroid-associated ophthalmopathy. Biosci Rep. 2017
8204	Comparing the Performance of Compass Perimetry With Humphrey Field Analyzer in Eyes With Glaucoma.	Rao HL, Raveendran S, James V, Dasari S, Palakurthy M, Reddy HB, Pradhan ZS, Rao DA, Puttaiah NK, Devi S.	J Glaucoma. 2017 Mar;26(3):292-297. doi: 10.1097/IJG.0000000000000609.	J Glaucoma		2017			0.0132868		doi: 10.1097/IJG.0000000000000609	27977480					0			0				0	0		doi: 10.1097/IJG.0000000000000609	Rao HL, Raveendran S, James V, Dasari S, Palakurthy M, Reddy HB, Pradhan ZS, Rao DA, Puttaiah NK, Devi S., Comparing the Performance of Compass Perimetry With Humphrey Field Analyzer in Eyes With Glaucoma. J Glaucoma. 2017
9518	Amelanotic iris melanoma.	Ajamil Rodanés S, García-Álvarez C, Saornil Álvarez MA.	Arch Soc Esp Oftalmol. 2017 Feb;92(2):e11. doi: 10.1016/j.oftal.2016.07.006. Epub 2016 Sep 21. English, Spanish. No abstract available.	Arch Soc Esp Oftalmol		2017			0.0133837		doi: 10.1016/j.oftal.2016.07.006	27665123					0			0				0	0		doi: 10.1016/j.oftal.2016.07.006	Ajamil Rodanés S, García-Álvarez C, Saornil Álvarez MA., Amelanotic iris melanoma. Arch Soc Esp Oftalmol. 2017
7910	Compound heterozygosity for severe and hypomorphic NDUFS2 mutations cause non-syndromic LHON-like optic neuropathy.	Gerber S, Ding MG, Gérard X, Zwicker K, Zanlonghi X, Rio M, Serre V, Hanein S, Munnich A, Rotig A, Bianchi L, Amati-Bonneau P, Elpeleg O, Kaplan J, Brandt U, Rozet JM.	J Med Genet. 2017 May;54(5):346-356. doi: 10.1136/jmedgenet-2016-104212. Epub 2016 Dec 28.	J Med Genet		2017			0.013385		doi: 10.1136/jmedgenet-2016-104212	28031252					0			0				0	0		doi: 10.1136/jmedgenet-2016-104212	Gerber S, Ding MG, Gérard X, Zwicker K, Zanlonghi X, Rio M, Serre V, Hanein S, Munnich A, Rotig A, Bianchi L, Amati-Bonneau P, Elpeleg O, Kaplan J, Brandt U, Rozet JM., Compound heterozygosity for severe and hypomorphic NDUFS2 mutations cause non-syndromic LHON-like optic neuropathy. J Med Genet. 2017
4278	Ocular congenital cranial dysinnervation disorders (CCDDs): insights into axon growth and guidance.	Whitman MC, Engle EC.	Hum Mol Genet. 2017 Aug 1;26(R1):R37-R44. doi: 10.1093/hmg/ddx168. Review.	Hum Mol Genet		2017			0.0134427		doi: 10.1093/hmg/ddx168	28459979					0			0				0	0		doi: 10.1093/hmg/ddx168	Whitman MC, Engle EC., Ocular congenital cranial dysinnervation disorders (CCDDs): insights into axon growth and guidance. Hum Mol Genet. 2017
482	Decision-making and management of uveitic cataract.	Chan NS, Ti SE, Chee SP.	Indian J Ophthalmol. 2017 Dec;65(12):1329-1339. doi: 10.4103/ijo.IJO_740_17. Review.	Indian J Ophthalmol		2017			0.0134643		doi: 10.4103/ijo.IJO_740_17	29208813					0			0				0	0		doi: 10.4103/ijo.IJO_740_17	Chan NS, Ti SE, Chee SP., Decision-making and management of uveitic cataract. Indian J Ophthalmol. 2017
5945	Frequency of Testing to Detect Visual Field Progression Derived Using a Longitudinal Cohort of Glaucoma Patients.	Wu Z, Saunders LJ, Daga FB, Diniz-Filho A, Medeiros FA.	Ophthalmology. 2017 Jun;124(6):786-792. doi: 10.1016/j.ophtha.2017.01.027. Epub 2017 Mar 6.	Ophthalmology		2017			0.0135893		doi: 10.1016/j.ophtha.2017.01.027	28268099					0			0				0	0		doi: 10.1016/j.ophtha.2017.01.027	Wu Z, Saunders LJ, Daga FB, Diniz-Filho A, Medeiros FA., Frequency of Testing to Detect Visual Field Progression Derived Using a Longitudinal Cohort of Glaucoma Patients. Ophthalmology. 2017
6038	Microperimetry in age: related macular degeneration.	Midena E, Pilotto E.	Eye (Lond). 2017 Jul;31(7):985-994. doi: 10.1038/eye.2017.34. Epub 2017 Mar 3. Review.	Eye (Lond)		2017			0.0136948		doi: 10.1038/eye.2017.34	28257134					0			0				0	0		doi: 10.1038/eye.2017.34	Midena E, Pilotto E., Microperimetry in age: related macular degeneration. Eye (Lond). 2017
9184	Retrobulbar Injection of Amphotericin B for Orbital Mucormycosis.	Hirabayashi KE, Kalin-Hajdu E, Brodie FL, Kersten RC, Russell MS, Vagefi MR.	Ophthal Plast Reconstr Surg. 2017 Jul/Aug;33(4):e94-e97. doi: 10.1097/IOP.0000000000000806.	Ophthal Plast Reconstr Surg		2017			0.0137128		doi: 10.1097/IOP.0000000000000806	27768642					0			0				0	0		doi: 10.1097/IOP.0000000000000806	Hirabayashi KE, Kalin-Hajdu E, Brodie FL, Kersten RC, Russell MS, Vagefi MR., Retrobulbar Injection of Amphotericin B for Orbital Mucormycosis. Ophthal Plast Reconstr Surg. 2017
328	Anticlotting agents and the surgical management of glaucoma.	Sozeri Y, Salim S.	Curr Opin Ophthalmol. 2018 Mar;29(2):185-189. doi: 10.1097/ICU.0000000000000456. Review.	Curr Opin Ophthalmol		2018			0.0137955		doi: 10.1097/ICU.0000000000000456	29256896					0			0				0	0		doi: 10.1097/ICU.0000000000000456	Sozeri Y, Salim S., Anticlotting agents and the surgical management of glaucoma. Curr Opin Ophthalmol. 2018
1414	Indications for eye removal over a 13-year period at an ophthalmology referral center in São Paulo, Brazil.	Hime B, Isenberg J, Rocha G, Lowen M, Morales M, Fernandes BF, Belfort RN.	Arq Bras Oftalmol. 2017 Jul-Aug;80(4):220-223. doi: 10.5935/0004-2749.20170054.	Arq Bras Oftalmol		2017			0.0138134		doi: 10.5935/0004-2749.20170054	28954020					0			0				0	0		doi: 10.5935/0004-2749.20170054	Hime B, Isenberg J, Rocha G, Lowen M, Morales M, Fernandes BF, Belfort RN., Indications for eye removal over a 13-year period at an ophthalmology referral center in São Paulo, Brazil. Arq Bras Oftalmol. 2017
9226	Diagnostic and Therapeutic Challenges.	Yong Huang X, Wu N, Li N, Wang Y, Shakoor A.	Retina. 2017 Nov;37(11):2195-2198. doi: 10.1097/IAE.0000000000001368. No abstract available.	Retina		2017			0.013997		doi: 10.1097/IAE.0000000000001368	27759580					0			0				0	0		doi: 10.1097/IAE.0000000000001368	Yong Huang X, Wu N, Li N, Wang Y, Shakoor A., Diagnostic and Therapeutic Challenges. Retina. 2017
8477	Nap Interferes with Hypoxia-Inducible Factors and VEGF Expression in Retina of Diabetic Rats.	D'Amico AG, Maugeri G, Bucolo C, Saccone S, Federico C, Cavallaro S, D'Agata V.	J Mol Neurosci. 2017 Feb;61(2):256-266. doi: 10.1007/s12031-016-0869-6. Epub 2016 Dec 1.	J Mol Neurosci		2017			0.0140153		doi: 10.1007/s12031-016-0869-6	27909871					0			0				0	0		doi: 10.1007/s12031-016-0869-6	D'Amico AG, Maugeri G, Bucolo C, Saccone S, Federico C, Cavallaro S, D'Agata V., Nap Interferes with Hypoxia-Inducible Factors and VEGF Expression in Retina of Diabetic Rats. J Mol Neurosci. 2017
332	Background sequence characteristics influence the occurrence and severity of disease-causing mtDNA mutations.	Wei W, Gomez-Duran A, Hudson G, Chinnery PF.	PLoS Genet. 2017 Dec 18;13(12):e1007126. doi: 10.1371/journal.pgen.1007126. eCollection 2017 Dec.	PLoS Genet		2017			0.0140162		doi: 10.1371/journal.pgen.1007126	29253894					0			0				0	0		doi: 10.1371/journal.pgen.1007126	Wei W, Gomez-Duran A, Hudson G, Chinnery PF., Background sequence characteristics influence the occurrence and severity of disease-causing mtDNA mutations. PLoS Genet. 2017
7573	Number of Bacteria and Time of Coincubation With Bacteria Required for the Development of Acanthamoeba Keratitis.	Nakagawa H, Hattori T, Koike N, Ehara T, Narimatsu A, Kumakura S, Matsumoto T, Goto H.	Cornea. 2017 Mar;36(3):353-357. doi: 10.1097/ICO.0000000000001129.	Cornea		2017			0.0140736		doi: 10.1097/ICO.0000000000001129	28079686					0			0				0	0		doi: 10.1097/ICO.0000000000001129	Nakagawa H, Hattori T, Koike N, Ehara T, Narimatsu A, Kumakura S, Matsumoto T, Goto H., Number of Bacteria and Time of Coincubation With Bacteria Required for the Development of Acanthamoeba Keratitis. Cornea. 2017
4399	Trabeculectomy or Transscleral Cyclophotocoagulation as Initial Treatment of Secondary Childhood Glaucoma in Northern Tanzania.	Fieß A, Shah P, Sii F, Godfrey F, Abbott J, Bowman R, Bauer J, Dithmar S, Philippin H.	J Glaucoma. 2017 Jul;26(7):657-660. doi: 10.1097/IJG.0000000000000682.	J Glaucoma		2017			0.0140789		doi: 10.1097/IJG.0000000000000682	28448293					0			0				0	0		doi: 10.1097/IJG.0000000000000682	Fieß A, Shah P, Sii F, Godfrey F, Abbott J, Bowman R, Bauer J, Dithmar S, Philippin H., Trabeculectomy or Transscleral Cyclophotocoagulation as Initial Treatment of Secondary Childhood Glaucoma in Northern Tanzania. J Glaucoma. 2017
8278	CHANGE OF CHOROIDAL VOLUME IN UNTREATED CENTRAL SEROUS CHORIORETINOPATHY.	Pertl L, Haas A, Hausberger S, Pichler T, Rabensteiner DF, Seidel G, Malle EM, Weger M.	Retina. 2017 Sep;37(9):1792-1796. doi: 10.1097/IAE.0000000000001408.	Retina		2017			0.0140878		doi: 10.1097/IAE.0000000000001408	27941529					0			0				0	0		doi: 10.1097/IAE.0000000000001408	Pertl L, Haas A, Hausberger S, Pichler T, Rabensteiner DF, Seidel G, Malle EM, Weger M., CHANGE OF CHOROIDAL VOLUME IN UNTREATED CENTRAL SEROUS CHORIORETINOPATHY. Retina. 2017
9512	The importance of nonstop treatment after delivery for pregnant women with type 2 diabetes.	Omori Y, Yanagisawa K, Sato A, Uchigata Y.	Diabetes Metab Res Rev. 2017 Mar;33(3). doi: 10.1002/dmrr.2860. Epub 2016 Nov 30.	Diabetes Metab Res Rev		2017			0.014155		doi: 10.1002/dmrr.2860	27667505					0			0				0	0		doi: 10.1002/dmrr.2860	Omori Y, Yanagisawa K, Sato A, Uchigata Y., The importance of nonstop treatment after delivery for pregnant women with type 2 diabetes. Diabetes Metab Res Rev. 2017
266	Assessment of visual morbidity amongst diabetic retinopathy at tertiary eye care center, Nepal: a cross-sectional descriptive study.	Pandey A, Lamichhane G, Khanal R, Rai SKC, Bhari AM, Borroni D, Gautam N.	BMC Ophthalmol. 2017 Dec 28;17(1):263. doi: 10.1186/s12886-017-0656-3.	BMC Ophthalmol		2017			0.0145174		doi: 10.1186/s12886-017-0656-3	29282017					0			0				0	0		doi: 10.1186/s12886-017-0656-3	Pandey A, Lamichhane G, Khanal R, Rai SKC, Bhari AM, Borroni D, Gautam N., Assessment of visual morbidity amongst diabetic retinopathy at tertiary eye care center, Nepal: a cross-sectional descriptive study. BMC Ophthalmol. 2017
1443	Assessment of patient perception of glaucomatous visual field loss and its association with disease severity using Amsler grid.	Fujitani K, Su D, Ghassibi MP, Simonson JL, Liebmann JM, Ritch R, Park SC.	PLoS One. 2017 Sep 26;12(9):e0184230. doi: 10.1371/journal.pone.0184230. eCollection 2017.	PLoS One		2017			0.0145184		doi: 10.1371/journal.pone.0184230	28949971					0			0				0	0		doi: 10.1371/journal.pone.0184230	Fujitani K, Su D, Ghassibi MP, Simonson JL, Liebmann JM, Ritch R, Park SC., Assessment of patient perception of glaucomatous visual field loss and its association with disease severity using Amsler grid. PLoS One. 2017
3612	Retinoblastoma: Update on Current Management.	Cassoux N, Lumbroso L, Levy-Gabriel C, Aerts I, Doz F, Desjardins L.	Asia Pac J Ophthalmol (Phila). 2017 May-Jun;6(3):290-295. doi: 10.22608/APO.201778. Review.	Asia Pac J Ophthalmol (Phila)		2017			0.0145442		doi: 10.22608/APO.201778	28558178					0			0				0	0		doi: 10.22608/APO.201778	Cassoux N, Lumbroso L, Levy-Gabriel C, Aerts I, Doz F, Desjardins L., Retinoblastoma: Update on Current Management. Asia Pac J Ophthalmol (Phila). 2017
5857	Blindness, tetraspasticity, and other signs of irreversible brain damage in hereditary angioedema.	Bork K, Brehler R, Witzke G, Boor S, Heineke W, Hardt J.	Ann Allergy Asthma Immunol. 2017 Apr;118(4):520-521. doi: 10.1016/j.anai.2017.01.027. Epub 2017 Mar 6. No abstract available.	Ann Allergy Asthma Immunol		2017			0.0145519		doi: 10.1016/j.anai.2017.01.027	28279594					0			0				0	0		doi: 10.1016/j.anai.2017.01.027	Bork K, Brehler R, Witzke G, Boor S, Heineke W, Hardt J., Blindness, tetraspasticity, and other signs of irreversible brain damage in hereditary angioedema. Ann Allergy Asthma Immunol. 2017
9472	Adalimumab effectiveness in Behçet's disease: short and long-term data from a multicenter retrospective observational study.	Vitale A, Emmi G, Lopalco G, Gentileschi S, Silvestri E, Fabiani C, Urban ML, Frediani B, Galeazzi M, Iannone F, Rigante D, Cantarini L.	Clin Rheumatol. 2017 Feb;36(2):451-455. doi: 10.1007/s10067-016-3417-4. Epub 2016 Sep 27.	Clin Rheumatol		2017			0.0148585		doi: 10.1007/s10067-016-3417-4	27679471					0			0				0	0		doi: 10.1007/s10067-016-3417-4	Vitale A, Emmi G, Lopalco G, Gentileschi S, Silvestri E, Fabiani C, Urban ML, Frediani B, Galeazzi M, Iannone F, Rigante D, Cantarini L., Adalimumab effectiveness in Behçet's disease: short and long-term data from a multicenter retrospective observational study. Clin Rheumatol. 2017
3989	Varicella Zoster Virus-Associated Necrotizing Retinitis After Chickenpox in a 10-Year-Old Female: A Case Report.	Shin YU, Kim J, Hong EH, Kim J, Sohn JH, Cho H.	Pediatr Infect Dis J. 2017 Oct;36(10):1008-1011. doi: 10.1097/INF.0000000000001641.	Pediatr Infect Dis J		2017			0.0149031		doi: 10.1097/INF.0000000000001641	28498303					0			0				0	0		doi: 10.1097/INF.0000000000001641	Shin YU, Kim J, Hong EH, Kim J, Sohn JH, Cho H., Varicella Zoster Virus-Associated Necrotizing Retinitis After Chickenpox in a 10-Year-Old Female: A Case Report. Pediatr Infect Dis J. 2017
4211	Comprehensive analysis of mouse retinal mononuclear phagocytes.	Lückoff A, Scholz R, Sennlaub F, Xu H, Langmann T.	Nat Protoc. 2017 Jun;12(6):1136-1150. doi: 10.1038/nprot.2017.032. Epub 2017 May 4.	Nat Protoc		2017			0.0149082		doi: 10.1038/nprot.2017.032	28471458					0			0				0	0		doi: 10.1038/nprot.2017.032	Lückoff A, Scholz R, Sennlaub F, Xu H, Langmann T., Comprehensive analysis of mouse retinal mononuclear phagocytes. Nat Protoc. 2017
9290	Comparative Confocal and Histopathological Study of Corneal Changes in Multiple Myeloma.	Micali A, Roszkowska AM, Postorino EI, Rania L, Aragona E, Wylegala E, Nowinska A, Ieni A, Calimeri S, Pisani A, Aragona P, Puzzolo D.	Cornea. 2017 Jan;36(1):123-126.	Cornea		2017			0.0149764		#VALUE!	27749452					0			0				0	0		#VALUE!	Micali A, Roszkowska AM, Postorino EI, Rania L, Aragona E, Wylegala E, Nowinska A, Ieni A, Calimeri S, Pisani A, Aragona P, Puzzolo D., Comparative Confocal and Histopathological Study of Corneal Changes in Multiple Myeloma. Cornea. 2017
4854	Conjunctival-limbal autograft.	Daya SM.	Curr Opin Ophthalmol. 2017 Jul;28(4):370-376. doi: 10.1097/ICU.0000000000000385. Review.	Curr Opin Ophthalmol		2017			0.0149912		doi: 10.1097/ICU.0000000000000385	28399069					0			0				0	0		doi: 10.1097/ICU.0000000000000385	Daya SM., Conjunctival-limbal autograft. Curr Opin Ophthalmol. 2017
164	Risk of macular degeneration affected by polymorphisms in Matrix metalloproteinase-2: A case-control study in Chinese Han population.	Cheng J, Hao X, Zhang Z.	Medicine (Baltimore). 2017 Nov;96(47):e8190. doi: 10.1097/MD.0000000000008190.	Medicine (Baltimore)		2017			0.0150248		doi: 10.1097/MD.0000000000008190	29381911					0			0				0	0		doi: 10.1097/MD.0000000000008190	Cheng J, Hao X, Zhang Z., Risk of macular degeneration affected by polymorphisms in Matrix metalloproteinase-2: A case-control study in Chinese Han population. Medicine (Baltimore). 2017
5149	Spermidine Oxidation-Mediated Degeneration of Retinal Pigment Epithelium in Rats.	Ohashi K, Kageyama M, Shinomiya K, Fujita-Koyama Y, Hirai SI, Katsuta O, Nakamura M.	Oxid Med Cell Longev. 2017;2017:4128061. doi: 10.1155/2017/4128061. Epub 2017 Mar 7.	Oxid Med Cell Longev		2017			0.0151467		doi: 10.1155/2017/4128061	28367269					0			0				0	0		doi: 10.1155/2017/4128061	Ohashi K, Kageyama M, Shinomiya K, Fujita-Koyama Y, Hirai SI, Katsuta O, Nakamura M., Spermidine Oxidation-Mediated Degeneration of Retinal Pigment Epithelium in Rats. Oxid Med Cell Longev. 2017
8272	Diltiazem co treatment with cyclosporine for induction of disease remission in sight-threatening non-infectious intraocular inflammation.	Shalaby U.	Jpn J Ophthalmol. 2017 Mar;61(2):169-178. doi: 10.1007/s10384-016-0490-9. Epub 2016 Dec 10.	Jpn J Ophthalmol		2017			0.0151643		doi: 10.1007/s10384-016-0490-9	27943089					0			0				0	0		doi: 10.1007/s10384-016-0490-9	Shalaby U., Diltiazem co treatment with cyclosporine for induction of disease remission in sight-threatening non-infectious intraocular inflammation. Jpn J Ophthalmol. 2017
3393	Iris-claw intraocular lens implantation in children with ectopia lentis.	Çevik SG, Çevik MÖ, Özmen AT.	Arq Bras Oftalmol. 2017 Mar-Apr;80(2):114-117. doi: 10.5935/0004-2749.20170027.	Arq Bras Oftalmol		2017			0.0153064		doi: 10.5935/0004-2749.20170027	28591285					0			0				0	0		doi: 10.5935/0004-2749.20170027	Çevik SG, Çevik MÖ, Özmen AT., Iris-claw intraocular lens implantation in children with ectopia lentis. Arq Bras Oftalmol. 2017
7778	Retina and Choroid of Diabetic Patients Without Observed Retinal Vascular Changes: A Longitudinal Study.	Tavares Ferreira J, Proença R, Alves M, Dias-Santos A, Santos BO, Cunha JP, Papoila AL, Abegão Pinto L.	Am J Ophthalmol. 2017 Apr;176:15-25. doi: 10.1016/j.ajo.2016.12.023. Epub 2017 Jan 2.	Am J Ophthalmol		2017			0.0153155		doi: 10.1016/j.ajo.2016.12.023	28057456					0			0				0	0		doi: 10.1016/j.ajo.2016.12.023	Tavares Ferreira J, Proença R, Alves M, Dias-Santos A, Santos BO, Cunha JP, Papoila AL, Abegão Pinto L., Retina and Choroid of Diabetic Patients Without Observed Retinal Vascular Changes: A Longitudinal Study. Am J Ophthalmol. 2017
6221	Spectacle plane add power of multifocal intraocular lenses according to effective lens position.	Eom Y, Song JS, Kim HM.	Can J Ophthalmol. 2017 Feb;52(1):54-60. doi: 10.1016/j.jcjo.2016.07.026. Epub 2016 Nov 18.	Can J Ophthalmol		2017			0.0153973		doi: 10.1016/j.jcjo.2016.07.026	28237150					0			0				0	0		doi: 10.1016/j.jcjo.2016.07.026	Eom Y, Song JS, Kim HM., Spectacle plane add power of multifocal intraocular lenses according to effective lens position. Can J Ophthalmol. 2017
173	Precision and agreement of higher order aberrations measured with ray tracing and Hartmann-Shack aberrometers.	Xu Z, Hua Y, Qiu W, Li G, Wu Q.	BMC Ophthalmol. 2018 Jan 27;18(1):18. doi: 10.1186/s12886-018-0683-8.	BMC Ophthalmol		2018			0.0154729		doi: 10.1186/s12886-018-0683-8	29374460					0			0				0	0		doi: 10.1186/s12886-018-0683-8	Xu Z, Hua Y, Qiu W, Li G, Wu Q., Precision and agreement of higher order aberrations measured with ray tracing and Hartmann-Shack aberrometers. BMC Ophthalmol. 2018
657	Predictors of Intraocular Pressure After Phacoemulsification in Primary Open-Angle Glaucoma Eyes with Wide Versus Narrower Angles (An American Ophthalmological Society Thesis).	Lin SC, Masis M, Porco TC, Pasquale LR.	Trans Am Ophthalmol Soc. 2017 Oct 23;115:T6. eCollection 2017 Aug. Erratum in: Trans Am Ophthalmol Soc. 2018 Jan 01;115:T6C1.	Trans Am Ophthalmol Soc		2017			0.0155333		#VALUE!	29147104					0			0				0	0		#VALUE!	Lin SC, Masis M, Porco TC, Pasquale LR., Predictors of Intraocular Pressure After Phacoemulsification in Primary Open-Angle Glaucoma Eyes with Wide Versus Narrower Angles (An American Ophthalmological Society Thesis). Trans Am Ophthalmol Soc. 2017
10149	Complex phenotypes blur conventional borders between Say-Barber-Biesecker-Young-Simpson syndrome and genitopatellar syndrome.	Radvanszky J, Hyblova M, Durovcikova D, Hikkelova M, Fiedler E, Kadasi L, Turna J, Minarik G, Szemes T.	Clin Genet. 2017 Feb;91(2):339-343. doi: 10.1111/cge.12840. Epub 2016 Sep 29.	Clin Genet		2017			0.0156155		doi: 10.1111/cge.12840	27452416					0			0				0	0		doi: 10.1111/cge.12840	Radvanszky J, Hyblova M, Durovcikova D, Hikkelova M, Fiedler E, Kadasi L, Turna J, Minarik G, Szemes T., Complex phenotypes blur conventional borders between Say-Barber-Biesecker-Young-Simpson syndrome and genitopatellar syndrome. Clin Genet. 2017
8830	Intracameral Air in Phacovitrectomy for Maintaining Intraocular Lens Position.	Tye A, Klufas MA, McCannel CA, McCannel TA.	Retina. 2017 Jun;37(6):1207-1208. doi: 10.1097/IAE.0000000000001401. No abstract available.	Retina		2017			0.0157551		doi: 10.1097/IAE.0000000000001401	27828914					0			0				0	0		doi: 10.1097/IAE.0000000000001401	Tye A, Klufas MA, McCannel CA, McCannel TA., Intracameral Air in Phacovitrectomy for Maintaining Intraocular Lens Position. Retina. 2017
2296	Assessing the utility of 2.5% phenylephrine for diagnostic pupillary dilation.	Liu JC, Green W, Van Stavern GP, Culican SM.	Can J Ophthalmol. 2017 Aug;52(4):349-354. doi: 10.1016/j.jcjo.2017.01.023.	Can J Ophthalmol		2017			0.0158338		doi: 10.1016/j.jcjo.2017.01.023	28774515					0			0				0	0		doi: 10.1016/j.jcjo.2017.01.023	Liu JC, Green W, Van Stavern GP, Culican SM., Assessing the utility of 2.5% phenylephrine for diagnostic pupillary dilation. Can J Ophthalmol. 2017
6501	Functional benefits and patient satisfaction with upper blepharoplasty - evaluated by objective and subjective outcome measures.	Jacobsen AG, Brost B, Vorum H, Hargitai J.	Acta Ophthalmol. 2017 Dec;95(8):820-825. doi: 10.1111/aos.13385. Epub 2017 Feb 15.	Acta Ophthalmol		2017			0.0159287		doi: 10.1111/aos.13385	28205342					0			0				0	0		doi: 10.1111/aos.13385	Jacobsen AG, Brost B, Vorum H, Hargitai J., Functional benefits and patient satisfaction with upper blepharoplasty - evaluated by objective and subjective outcome measures. Acta Ophthalmol. 2017
2444	Traumatic cataract in patient with anterior megalophthalmos: Case report.	Chlasta-Twardzik E, Nowińska A, Wąs P, Jakubowska A, Wylęgała E.	Medicine (Baltimore). 2017 Jul;96(30):e7160. doi: 10.1097/MD.0000000000007160.	Medicine (Baltimore)		2017			0.0159496		doi: 10.1097/MD.0000000000007160	28746174					0			0				0	0		doi: 10.1097/MD.0000000000007160	Chlasta-Twardzik E, Nowińska A, Wąs P, Jakubowska A, Wylęgała E., Traumatic cataract in patient with anterior megalophthalmos: Case report. Medicine (Baltimore). 2017
588	Retinal putative glial alterations: implication for glaucoma care.	Ashimatey BS, King BJ, Swanson WH.	Ophthalmic Physiol Opt. 2018 Jan;38(1):56-65. doi: 10.1111/opo.12425. Epub 2017 Nov 23.	Ophthalmic Physiol Opt		2018			0.0159725		doi: 10.1111/opo.12425	29168194					0			0				0	0		doi: 10.1111/opo.12425	Ashimatey BS, King BJ, Swanson WH., Retinal putative glial alterations: implication for glaucoma care. Ophthalmic Physiol Opt. 2018
8294	The association between skin autofluorescence and mean deviation in patients with open-angle glaucoma.	Himori N, Kunikata H, Kawasaki R, Shiga Y, Omodaka K, Takahashi H, Miyata T, Nakazawa T.	Br J Ophthalmol. 2017 Feb;101(2):233-238. doi: 10.1136/bjophthalmol-2016-309504. Epub 2016 Dec 9.	Br J Ophthalmol		2017			0.0160884		doi: 10.1136/bjophthalmol-2016-309504	27941048					0			0				0	0		doi: 10.1136/bjophthalmol-2016-309504	Himori N, Kunikata H, Kawasaki R, Shiga Y, Omodaka K, Takahashi H, Miyata T, Nakazawa T., The association between skin autofluorescence and mean deviation in patients with open-angle glaucoma. Br J Ophthalmol. 2017
3646	Risk of progression in macula-on rhegmatogenous retinal detachment.	Callizo J, Pfeiffer S, Lahme E, van Oterendorp C, Khattab M, Bemme S, Kulanga M, Hoerauf H, Feltgen N.	Graefes Arch Clin Exp Ophthalmol. 2017 Aug;255(8):1559-1564. doi: 10.1007/s00417-017-3696-8. Epub 2017 May 27.	Graefes Arch Clin Exp Ophthalmol		2017			0.0161745		doi: 10.1007/s00417-017-3696-8	28551879					0			0				0	0		doi: 10.1007/s00417-017-3696-8	Callizo J, Pfeiffer S, Lahme E, van Oterendorp C, Khattab M, Bemme S, Kulanga M, Hoerauf H, Feltgen N., Risk of progression in macula-on rhegmatogenous retinal detachment. Graefes Arch Clin Exp Ophthalmol. 2017
6365	Comparison of methods for identifying causative bacterial microorganisms in presumed acute endophthalmitis: conventional culture, blood culture, and PCR.	Pongsachareonnont P, Honglertnapakul W, Chatsuwan T.	BMC Infect Dis. 2017 Feb 21;17(1):165. doi: 10.1186/s12879-017-2264-5.	BMC Infect Dis		2017			0.0161927		doi: 10.1186/s12879-017-2264-5	28222703					0			0				0	0		doi: 10.1186/s12879-017-2264-5	Pongsachareonnont P, Honglertnapakul W, Chatsuwan T., Comparison of methods for identifying causative bacterial microorganisms in presumed acute endophthalmitis: conventional culture, blood culture, and PCR. BMC Infect Dis. 2017
7352	Pseudoherpetic transient acantholytic dermatosis (Grover disease): case series and review of the literature.	Motaparthi K.	J Cutan Pathol. 2017 May;44(5):486-489. doi: 10.1111/cup.12909. Epub 2017 Feb 16. Review.	J Cutan Pathol		2017			0.0163183		doi: 10.1111/cup.12909	28102002					0			0				0	0		doi: 10.1111/cup.12909	Motaparthi K., Pseudoherpetic transient acantholytic dermatosis (Grover disease): case series and review of the literature. J Cutan Pathol. 2017
8283	Periorbital Dermoid Cyst With Unique Trichilemmal Differentiation.	Charles NC, Jakobiec FA, Patel P.	Ophthal Plast Reconstr Surg. 2017 Sep/Oct;33(5):e116-e118. doi: 10.1097/IOP.0000000000000837.	Ophthal Plast Reconstr Surg		2017			0.0165061		doi: 10.1097/IOP.0000000000000837	27941469					0			0				0	0		doi: 10.1097/IOP.0000000000000837	Charles NC, Jakobiec FA, Patel P., Periorbital Dermoid Cyst With Unique Trichilemmal Differentiation. Ophthal Plast Reconstr Surg. 2017
7898	Rationale and Methodology for a Community-Based Study of Diabetic Retinopathy in an Indonesian Population with Type 2 Diabetes Mellitus: The Jogjakarta Eye Diabetic Study in the Community.	Sasongko MB, Agni AN, Wardhana FS, Kotha SP, Gupta P, Widayanti TW, Supanji, Widyaputri F, Widyaningrum R, Wong TY, Kawasaki R, Wang JJ, Pawiroranu S.	Ophthalmic Epidemiol. 2017 Feb;24(1):48-56. doi: 10.1080/09286586.2016.1255763. Epub 2016 Dec 29.	Ophthalmic Epidemiol		2017			0.0165753		doi: 10.1080/09286586.2016.1255763	28032809					0			0				0	0		doi: 10.1080/09286586.2016.1255763	Sasongko MB, Agni AN, Wardhana FS, Kotha SP, Gupta P, Widayanti TW, Supanji, Widyaputri F, Widyaningrum R, Wong TY, Kawasaki R, Wang JJ, Pawiroranu S., Rationale and Methodology for a Community-Based Study of Diabetic Retinopathy in an Indonesian Population with Type 2 Diabetes Mellitus: The Jogjakarta Eye Diabetic Study in the Community. Ophthalmic Epidemiol. 2017
3986	Involvement of microglia in early axoglial alterations of the optic nerve induced by experimental glaucoma.	Bordone MP, González Fleitas MF, Pasquini LA, Bosco A, Sande PH, Rosenstein RE, Dorfman D.	J Neurochem. 2017 Jul;142(2):323-337. doi: 10.1111/jnc.14070. Epub 2017 Jun 9.	J Neurochem		2017			0.0166094		doi: 10.1111/jnc.14070	28498493					0			0				0	0		doi: 10.1111/jnc.14070	Bordone MP, González Fleitas MF, Pasquini LA, Bosco A, Sande PH, Rosenstein RE, Dorfman D., Involvement of microglia in early axoglial alterations of the optic nerve induced by experimental glaucoma. J Neurochem. 2017
7390	Diagnosis for choroideremia in a large Chinese pedigree by next‑generation sequencing (NGS) and non‑invasive prenatal testing (NIPT).	Zhu L, Cheng J, Zhou B, Wei C, Yang W, Jiang D, Ijaz I, Tan X, Chen R, Fu J.	Mol Med Rep. 2017 Mar;15(3):1157-1164. doi: 10.3892/mmr.2017.6119. Epub 2017 Jan 13.	Mol Med Rep		2017			0.016782		doi: 10.3892/mmr.2017.6119	28098911					0			0				0	0		doi: 10.3892/mmr.2017.6119	Zhu L, Cheng J, Zhou B, Wei C, Yang W, Jiang D, Ijaz I, Tan X, Chen R, Fu J., Diagnosis for choroideremia in a large Chinese pedigree by next‑generation sequencing (NGS) and non‑invasive prenatal testing (NIPT). Mol Med Rep. 2017
1466	Proteolytic Degradation and Inflammation Play Critical Roles in Polypoidal Choroidal Vasculopathy.	Kumar S, Nakashizuka H, Jones A, Lambert A, Zhao X, Shen M, Parker M, Wang S, Berriochoa Z, Fnu A, VanBeuge S, Chévez-Barrios P, Tso M, Rainier J, Fu Y.	Am J Pathol. 2017 Dec;187(12):2841-2857. doi: 10.1016/j.ajpath.2017.08.025. Epub 2017 Sep 21.	Am J Pathol		2017			0.0167908		doi: 10.1016/j.ajpath.2017.08.025	28941979					0			0				0	0		doi: 10.1016/j.ajpath.2017.08.025	Kumar S, Nakashizuka H, Jones A, Lambert A, Zhao X, Shen M, Parker M, Wang S, Berriochoa Z, Fnu A, VanBeuge S, Chévez-Barrios P, Tso M, Rainier J, Fu Y., Proteolytic Degradation and Inflammation Play Critical Roles in Polypoidal Choroidal Vasculopathy. Am J Pathol. 2017
2245	Novel Insights Into the Phenotypical Spectrum of KIF11-Associated Retinopathy, Including a New Form of Retinal Ciliopathy.	Birtel J, Gliem M, Mangold E, Tebbe L, Spier I, Müller PL, Holz FG, Neuhaus C, Wolfrum U, Bolz HJ, Charbel Issa P.	Invest Ophthalmol Vis Sci. 2017 Aug 1;58(10):3950-3959. doi: 10.1167/iovs.17-21679.	Invest Ophthalmol Vis Sci		2017			0.016872		doi: 10.1167/iovs.17-21679	28785766					0			0				0	0		doi: 10.1167/iovs.17-21679	Birtel J, Gliem M, Mangold E, Tebbe L, Spier I, Müller PL, Holz FG, Neuhaus C, Wolfrum U, Bolz HJ, Charbel Issa P., Novel Insights Into the Phenotypical Spectrum of KIF11-Associated Retinopathy, Including a New Form of Retinal Ciliopathy. Invest Ophthalmol Vis Sci. 2017
5889	Galectins expressed differently in genetically susceptible C57BL/6 and resistant BALB/c mice during acute ocular Toxoplasma gondii infection.	Chen SJ, Zhang YX, Huang SG, Lu FL.	Parasitology. 2017 Jul;144(8):1064-1072. doi: 10.1017/S0031182017000270. Epub 2017 Mar 9.	Parasitology		2017			0.0168972		doi: 10.1017/S0031182017000270	28274286					0			0				0	0		doi: 10.1017/S0031182017000270	Chen SJ, Zhang YX, Huang SG, Lu FL., Galectins expressed differently in genetically susceptible C57BL/6 and resistant BALB/c mice during acute ocular Toxoplasma gondii infection. Parasitology. 2017
5133	Traffic-related air pollution and spectacles use in schoolchildren.	Dadvand P, Nieuwenhuijsen MJ, Basagaña X, Alvarez-Pedrerol M, Dalmau-Bueno A, Cirach M, Rivas I, Brunekreef B, Querol X, Morgan IG, Sunyer J.	PLoS One. 2017 Apr 3;12(4):e0167046. doi: 10.1371/journal.pone.0167046. eCollection 2017.	PLoS One		2017			0.0169594		doi: 10.1371/journal.pone.0167046	28369072					0			0				0	0		doi: 10.1371/journal.pone.0167046	Dadvand P, Nieuwenhuijsen MJ, Basagaña X, Alvarez-Pedrerol M, Dalmau-Bueno A, Cirach M, Rivas I, Brunekreef B, Querol X, Morgan IG, Sunyer J., Traffic-related air pollution and spectacles use in schoolchildren. PLoS One. 2017
7245	Peripheral Reticular Pigmentary Degeneration and Choroidal Vascular Insufficiency, Studied by Ultra Wide-Field Fluorescein Angiography.	Bae K, Cho K, Kang SW, Kim SJ, Kim JM.	PLoS One. 2017 Jan 23;12(1):e0170526. doi: 10.1371/journal.pone.0170526. eCollection 2017.	PLoS One		2017			0.0170538		doi: 10.1371/journal.pone.0170526	28114409					0			0				0	0		doi: 10.1371/journal.pone.0170526	Bae K, Cho K, Kang SW, Kim SJ, Kim JM., Peripheral Reticular Pigmentary Degeneration and Choroidal Vascular Insufficiency, Studied by Ultra Wide-Field Fluorescein Angiography. PLoS One. 2017
9559	Optical coherence tomography angiography in age-related macular degeneration: persistence of vascular network in quiescent choroidal neovascularization.	Wirth MA, Freiberg F, Pfau M, Wons J, Becker MD, Michels S.	Acta Ophthalmol. 2017 Jun;95(4):428-430. doi: 10.1111/aos.13226. Epub 2016 Sep 23. Review. No abstract available.	Acta Ophthalmol		2017			0.0170702		doi: 10.1111/aos.13226	27659278					0			0				0	0		doi: 10.1111/aos.13226	Wirth MA, Freiberg F, Pfau M, Wons J, Becker MD, Michels S., Optical coherence tomography angiography in age-related macular degeneration: persistence of vascular network in quiescent choroidal neovascularization. Acta Ophthalmol. 2017
4712	Phacoemulsification compared with phacotrabeculectomy surgery: a within-person observational cohort study.	Dhalla K, Cousens S, Murdoch IE.	Br J Ophthalmol. 2017 Dec;101(12):1628-1632. doi: 10.1136/bjophthalmol-2015-307837. Epub 2017 Apr 17.	Br J Ophthalmol		2017			0.0171933		doi: 10.1136/bjophthalmol-2015-307837	28416493					0			0				0	0		doi: 10.1136/bjophthalmol-2015-307837	Dhalla K, Cousens S, Murdoch IE., Phacoemulsification compared with phacotrabeculectomy surgery: a within-person observational cohort study. Br J Ophthalmol. 2017
3294	Overexpression of Angiotensin-Converting Enzyme 2 Ameliorates Amyloid β-Induced Inflammatory Response in Human Primary Retinal Pigment Epithelium.	Fu X, Lin R, Qiu Y, Yu P, Lei B.	Invest Ophthalmol Vis Sci. 2017 Jun 1;58(7):3018-3028. doi: 10.1167/iovs.17-21546.	Invest Ophthalmol Vis Sci		2017			0.017281		doi: 10.1167/iovs.17-21546	28605813					0			0				0	0		doi: 10.1167/iovs.17-21546	Fu X, Lin R, Qiu Y, Yu P, Lei B., Overexpression of Angiotensin-Converting Enzyme 2 Ameliorates Amyloid β-Induced Inflammatory Response in Human Primary Retinal Pigment Epithelium. Invest Ophthalmol Vis Sci. 2017
370	Hyperbaric oxygen in the treatment of acute retinal artery occlusion.	Elder MJ, Rawstron JA, Davis M.	Diving Hyperb Med. 2017 Dec;47(4):233-238. doi: 10.28920/dhm47.4.233-238.	Diving Hyperb Med		2017			0.0174295		doi: 10.28920/dhm47.4.233-238	29241233					0			0				0	0		doi: 10.28920/dhm47.4.233-238	Elder MJ, Rawstron JA, Davis M., Hyperbaric oxygen in the treatment of acute retinal artery occlusion. Diving Hyperb Med. 2017
4587	Reversible postoperative blindness caused by bilateral status epilepticus amauroticus following thoracolumbar deformity correction: case report.	Ibrahim TF, Sweis RT, Nockels RP.	J Neurosurg Spine. 2017 Jul;27(1):63-67. doi: 10.3171/2016.12.SPINE16540. Epub 2017 Apr 21.	J Neurosurg Spine		2017			0.0175301		doi: 10.3171/2016.12.SPINE16540	28430051					0			0				0	0		doi: 10.3171/2016.12.SPINE16540	Ibrahim TF, Sweis RT, Nockels RP., Reversible postoperative blindness caused by bilateral status epilepticus amauroticus following thoracolumbar deformity correction: case report. J Neurosurg Spine. 2017
6559	Significant Bilateral Response in Diabetic Macular Edema After Single Unilateral Intravitreal Aflibercept Injection.	Rahimy E, Nyong'o O, Leng T.	Ophthalmic Surg Lasers Imaging Retina. 2017 Feb 1;48(2):167-169. doi: 10.3928/23258160-20170130-11.	Ophthalmic Surg Lasers Imaging Retina		2017			0.0175391		doi: 10.3928/23258160-20170130-11	28195620					0			0				0	0		doi: 10.3928/23258160-20170130-11	Rahimy E, Nyong'o O, Leng T., Significant Bilateral Response in Diabetic Macular Edema After Single Unilateral Intravitreal Aflibercept Injection. Ophthalmic Surg Lasers Imaging Retina. 2017
368	Evaluation of Retinal Nerve Fiber Layer Thinning in Myopic Glaucoma: Impact of Optic Disc Morphology.	Na KI, Lee WJ, Kim YK, Park KH, Jeoung JW.	Invest Ophthalmol Vis Sci. 2017 Dec 1;58(14):6265-6272. doi: 10.1167/iovs.17-22534.	Invest Ophthalmol Vis Sci		2017			0.017623		doi: 10.1167/iovs.17-22534	29242900					0			0				0	0		doi: 10.1167/iovs.17-22534	Na KI, Lee WJ, Kim YK, Park KH, Jeoung JW., Evaluation of Retinal Nerve Fiber Layer Thinning in Myopic Glaucoma: Impact of Optic Disc Morphology. Invest Ophthalmol Vis Sci. 2017
3049	CYP1B1 Cytopathy: Uncommon Phenotype of a Homozygous CYP1B1 Deletion as Internal Corneal Ulcer of Von Hippel.	Oliva-Biénzobas V, Navas A, C Astiazarán M, Chacón-Camacho OF, A Bermúdez-Magner J, Takane M, Graue-Hernández E, Zenteno JC.	Cornea. 2017 Oct;36(10):1256-1259. doi: 10.1097/ICO.0000000000001263.	Cornea		2017			0.0178015		doi: 10.1097/ICO.0000000000001263	28644236					0			0				0	0		doi: 10.1097/ICO.0000000000001263	Oliva-Biénzobas V, Navas A, C Astiazarán M, Chacón-Camacho OF, A Bermúdez-Magner J, Takane M, Graue-Hernández E, Zenteno JC., CYP1B1 Cytopathy: Uncommon Phenotype of a Homozygous CYP1B1 Deletion as Internal Corneal Ulcer of Von Hippel. Cornea. 2017
7961	Treatment of blepharospasm with apraclonidine.	Vijayakumar D, Wijemanne S, Jankovic J.	J Neurol Sci. 2017 Jan 15;372:57-59. doi: 10.1016/j.jns.2016.11.029. Epub 2016 Nov 15.	J Neurol Sci		2017			0.0181243		doi: 10.1016/j.jns.2016.11.029	28017248					0			0				0	0		doi: 10.1016/j.jns.2016.11.029	Vijayakumar D, Wijemanne S, Jankovic J., Treatment of blepharospasm with apraclonidine. J Neurol Sci. 2017
9093	The Efficacy and Safety Profile of Ocriplasmin in Vitreomacular Interface Disorders.	Shaikh M, Miller JB, Papakostas TD, Husain D.	Semin Ophthalmol. 2017;32(1):52-55. doi: 10.1080/08820538.2016.1228416. Epub 2016 Oct 27. Review.	Semin Ophthalmol		2017			0.0181271		doi: 10.1080/08820538.2016.1228416	27786583					0			0				0	0		doi: 10.1080/08820538.2016.1228416	Shaikh M, Miller JB, Papakostas TD, Husain D., The Efficacy and Safety Profile of Ocriplasmin in Vitreomacular Interface Disorders. Semin Ophthalmol. 2017
9105	Melatonin and cortisol profiles in the absence of light perception.	Aubin S, Kupers R, Ptito M, Jennum P.	Behav Brain Res. 2017 Jan 15;317:515-521. doi: 10.1016/j.bbr.2016.09.060. Epub 2016 Sep 28.	Behav Brain Res		2017			0.018148		doi: 10.1016/j.bbr.2016.09.060	27693853					0			0				0	0		doi: 10.1016/j.bbr.2016.09.060	Aubin S, Kupers R, Ptito M, Jennum P., Melatonin and cortisol profiles in the absence of light perception. Behav Brain Res. 2017
3530	Antiretinal antibody- proven autoimmune retinopathy.	Abraham S, Sudharshan S, Bhende M, Ganesh SK, Gopal S.	Indian J Ophthalmol. 2017 May;65(5):416-420. doi: 10.4103/ijo.IJO_838_16.	Indian J Ophthalmol		2017			0.0182376		doi: 10.4103/ijo.IJO_838_16	28574003					0			0				0	0		doi: 10.4103/ijo.IJO_838_16	Abraham S, Sudharshan S, Bhende M, Ganesh SK, Gopal S., Antiretinal antibody- proven autoimmune retinopathy. Indian J Ophthalmol. 2017
1070	Macular Fluid Reduces Reproducibility of Choroidal Thickness Measurements on Enhanced Depth Optical Coherence Tomography.	Wong SS, Vuong VS, Cunefare D, Farsiu S, Moshiri A, Yiu G.	Am J Ophthalmol. 2017 Dec;184:108-114. doi: 10.1016/j.ajo.2017.10.005. Epub 2017 Oct 14.	Am J Ophthalmol		2017			0.0183764		doi: 10.1016/j.ajo.2017.10.005	29038011					0			0				0	0		doi: 10.1016/j.ajo.2017.10.005	Wong SS, Vuong VS, Cunefare D, Farsiu S, Moshiri A, Yiu G., Macular Fluid Reduces Reproducibility of Choroidal Thickness Measurements on Enhanced Depth Optical Coherence Tomography. Am J Ophthalmol. 2017
6073	Association of Maternal Smoking During Pregnancy and Birth Weight With Retinal Nerve Fiber Layer Thickness in Children Aged 11 or 12 Years: The Copenhagen Child Cohort 2000 Eye Study.	Ashina H, Li XQ, Olsen EM, Skovgaard AM, Larsen M, Munch IC.	JAMA Ophthalmol. 2017 Apr 1;135(4):331-337. doi: 10.1001/jamaophthalmol.2017.0043.	JAMA Ophthalmol		2017			0.0183888		doi: 10.1001/jamaophthalmol.2017.0043	28253396					0			0				0	0		doi: 10.1001/jamaophthalmol.2017.0043	Ashina H, Li XQ, Olsen EM, Skovgaard AM, Larsen M, Munch IC., Association of Maternal Smoking During Pregnancy and Birth Weight With Retinal Nerve Fiber Layer Thickness in Children Aged 11 or 12 Years: The Copenhagen Child Cohort 2000 Eye Study. JAMA Ophthalmol. 2017
1638	Updates on the Epidemiology of Age-Related Macular Degeneration.	Jonas JB, Cheung CMG, Panda-Jonas S.	Asia Pac J Ophthalmol (Phila). 2017 Nov-Dec;6(6):493-497. doi: 10.22608/APO.2017251. Epub 2017 Sep 14. Review.	Asia Pac J Ophthalmol (Phila)		2017			0.0184851		doi: 10.22608/APO.2017251	28906084					0			0				0	0		doi: 10.22608/APO.2017251	Jonas JB, Cheung CMG, Panda-Jonas S., Updates on the Epidemiology of Age-Related Macular Degeneration. Asia Pac J Ophthalmol (Phila). 2017
7224	β2-Adrenergic Receptor Antagonism Attenuates CNV Through Inhibition of VEGF and IL-6 Expression.	Lavine JA, Farnoodian M, Wang S, Darjatmoko SR, Wright LS, Gamm DM, Ip MS, Sorenson CM, Sheibani N.	Invest Ophthalmol Vis Sci. 2017 Jan 1;58(1):299-308. doi: 10.1167/iovs.16-20204.	Invest Ophthalmol Vis Sci		2017			0.018508		doi: 10.1167/iovs.16-20204	28114591					0			0				0	0		doi: 10.1167/iovs.16-20204	Lavine JA, Farnoodian M, Wang S, Darjatmoko SR, Wright LS, Gamm DM, Ip MS, Sorenson CM, Sheibani N., β2-Adrenergic Receptor Antagonism Attenuates CNV Through Inhibition of VEGF and IL-6 Expression. Invest Ophthalmol Vis Sci. 2017
8396	Comprehensive profile of bilateral astigmatism: rule similarity and symmetry patterns of the axes in the fellow eyes.	Asharlous A, Khabazkhoob M, Yekta A, Hashemi H.	Ophthalmic Physiol Opt. 2017 Jan;37(1):33-41. doi: 10.1111/opo.12344. Epub 2016 Dec 5.	Ophthalmic Physiol Opt		2017			0.018551		doi: 10.1111/opo.12344	27921328					0			0				0	0		doi: 10.1111/opo.12344	Asharlous A, Khabazkhoob M, Yekta A, Hashemi H., Comprehensive profile of bilateral astigmatism: rule similarity and symmetry patterns of the axes in the fellow eyes. Ophthalmic Physiol Opt. 2017
788	Partially absorbed cataractous lens in the anterior chamber revealing neglected severe ocular contusion: a case report.	Dohvoma VA, Ebana Mvogo SR, Atipo-Tsiba PW, Epee E, Atangana PJA, Nko'o SA, Ebana Mvogo C.	BMC Ophthalmol. 2017 Nov 6;17(1):200. doi: 10.1186/s12886-017-0594-0.	BMC Ophthalmol		2017			0.0185558		doi: 10.1186/s12886-017-0594-0	29110702					0			0				0	0		doi: 10.1186/s12886-017-0594-0	Dohvoma VA, Ebana Mvogo SR, Atipo-Tsiba PW, Epee E, Atangana PJA, Nko'o SA, Ebana Mvogo C., Partially absorbed cataractous lens in the anterior chamber revealing neglected severe ocular contusion: a case report. BMC Ophthalmol. 2017
8182	Cytomegalovirus Retinitis in Patients With Acquired Immunodeficiency Syndrome After Initiating Antiretroviral Therapy.	Jabs DA, Van Natta ML, Holland GN, Danis R; Studies of the Ocular Complications of AIDS Research Group..	Am J Ophthalmol. 2017 Feb;174:23-32. doi: 10.1016/j.ajo.2016.10.011. Epub 2016 Oct 27.	Am J Ophthalmol		2017			0.0186348		doi: 10.1016/j.ajo.2016.10.011	27984023					0			0				0	0		doi: 10.1016/j.ajo.2016.10.011	Jabs DA, Van Natta ML, Holland GN, Danis R; Studies of the Ocular Complications of AIDS Research Group.., Cytomegalovirus Retinitis in Patients With Acquired Immunodeficiency Syndrome After Initiating Antiretroviral Therapy. Am J Ophthalmol. 2017
6991	Corneal profile in primary congenital glaucoma.	Doozandeh A, Yazdani S, Ansari S, Pakravan M, Motevasseli T, Hosseini B, Yasseri M.	Acta Ophthalmol. 2017 Nov;95(7):e575-e581. doi: 10.1111/aos.13357. Epub 2017 Jan 31.	Acta Ophthalmol		2017			0.0186657		doi: 10.1111/aos.13357	28139064					0			0				0	0		doi: 10.1111/aos.13357	Doozandeh A, Yazdani S, Ansari S, Pakravan M, Motevasseli T, Hosseini B, Yasseri M., Corneal profile in primary congenital glaucoma. Acta Ophthalmol. 2017
466	Sutureless 27-gauge needle-assisted transconjunctival intrascleral intraocular lens fixation: Initial experience.	Kelkar AS, Fogla R, Kelkar J, Kothari AA, Mehta H, Amoaku W.	Indian J Ophthalmol. 2017 Dec;65(12):1450-1453. doi: 10.4103/ijo.IJO_659_17.	Indian J Ophthalmol		2017			0.0187143		doi: 10.4103/ijo.IJO_659_17	29208833					0			0				0	0		doi: 10.4103/ijo.IJO_659_17	Kelkar AS, Fogla R, Kelkar J, Kothari AA, Mehta H, Amoaku W., Sutureless 27-gauge needle-assisted transconjunctival intrascleral intraocular lens fixation: Initial experience. Indian J Ophthalmol. 2017
7370	Involvement of XBP1s in Blue Light-Induced A2E-Containing Retinal Pigment Epithelium Cell Death.	Lu B, Zhang P, Zhou M, Wang W, Gu Q, Feng J, Luo X, Sun X, Wang F, Sun X.	Ophthalmic Res. 2017;57(4):252-262. doi: 10.1159/000452282. Epub 2017 Jan 19.	Ophthalmic Res		2017			0.0187457		doi: 10.1159/000452282	28099966					0			0				0	0		doi: 10.1159/000452282	Lu B, Zhang P, Zhou M, Wang W, Gu Q, Feng J, Luo X, Sun X, Wang F, Sun X., Involvement of XBP1s in Blue Light-Induced A2E-Containing Retinal Pigment Epithelium Cell Death. Ophthalmic Res. 2017
4312	Ten-year retrospective review of outcomes following phacoemulsification with intraocular lens implantation in patients with pre-existing uveitis.	Chiu H, Dang H, Cheung C, Khosla D, Arjmand P, Rabinovitch T, Derzko-Dzulynsky L.	Can J Ophthalmol. 2017 Apr;52(2):175-180. doi: 10.1016/j.jcjo.2016.10.007. Epub 2017 Jan 10.	Can J Ophthalmol		2017			0.0187613		doi: 10.1016/j.jcjo.2016.10.007	28457287					0			0				0	0		doi: 10.1016/j.jcjo.2016.10.007	Chiu H, Dang H, Cheung C, Khosla D, Arjmand P, Rabinovitch T, Derzko-Dzulynsky L., Ten-year retrospective review of outcomes following phacoemulsification with intraocular lens implantation in patients with pre-existing uveitis. Can J Ophthalmol. 2017
2425	LncRNA HOXA11-AS Exerts Oncogenic Functions by Repressing p21 and miR-124 in Uveal Melanoma.	Lu Q, Zhao N, Zha G, Wang H, Tong Q, Xin S.	DNA Cell Biol. 2017 Oct;36(10):837-844. doi: 10.1089/dna.2017.3808. Epub 2017 Jul 27.	DNA Cell Biol		2017			0.0188995		doi: 10.1089/dna.2017.3808	28749709					0			0				0	0		doi: 10.1089/dna.2017.3808	Lu Q, Zhao N, Zha G, Wang H, Tong Q, Xin S., LncRNA HOXA11-AS Exerts Oncogenic Functions by Repressing p21 and miR-124 in Uveal Melanoma. DNA Cell Biol. 2017
10791	Small molecules, both dietary and endogenous, influence the onset of lens cataracts.	Barnes S, Quinlan RA.	Exp Eye Res. 2017 Mar;156:87-94. doi: 10.1016/j.exer.2016.03.024. Epub 2016 Mar 31. Review.	Exp Eye Res		2017			0.0189053		doi: 10.1016/j.exer.2016.03.024	27039707					0			0				0	0		doi: 10.1016/j.exer.2016.03.024	Barnes S, Quinlan RA., Small molecules, both dietary and endogenous, influence the onset of lens cataracts. Exp Eye Res. 2017
1460	Imaging of tangential traction types in lamellar macular holes.	Acquistapace A, Cereda MG, Cigada M, Staurenghi G, Bottoni F.	Graefes Arch Clin Exp Ophthalmol. 2017 Dec;255(12):2331-2336. doi: 10.1007/s00417-017-3806-7. Epub 2017 Sep 23.	Graefes Arch Clin Exp Ophthalmol		2017			0.0189768		doi: 10.1007/s00417-017-3806-7	28942521					0			0				0	0		doi: 10.1007/s00417-017-3806-7	Acquistapace A, Cereda MG, Cigada M, Staurenghi G, Bottoni F., Imaging of tangential traction types in lamellar macular holes. Graefes Arch Clin Exp Ophthalmol. 2017
300	Reducing starbursts in highly aberrated eyes with pupil miosis.	Xu R, Kollbaum P, Thibos L, Lopez-Gil N, Bradley A.	Ophthalmic Physiol Opt. 2018 Jan;38(1):26-36. doi: 10.1111/opo.12420.	Ophthalmic Physiol Opt		2018			0.0189981		doi: 10.1111/opo.12420	29265469					0			0				0	0		doi: 10.1111/opo.12420	Xu R, Kollbaum P, Thibos L, Lopez-Gil N, Bradley A., Reducing starbursts in highly aberrated eyes with pupil miosis. Ophthalmic Physiol Opt. 2018
11002	Multifocal Intraocular Lens Results in Correcting Presbyopia in Eyes After Radial Keratotomy.	Kim KH, Seok KW, Kim WS.	Eye Contact Lens. 2017 Nov;43(6):e22-e25. doi: 10.1097/ICL.0000000000000208.	Eye Contact Lens		2017			0.0191117		doi: 10.1097/ICL.0000000000000208	26625851					0			0				0	0		doi: 10.1097/ICL.0000000000000208	Kim KH, Seok KW, Kim WS., Multifocal Intraocular Lens Results in Correcting Presbyopia in Eyes After Radial Keratotomy. Eye Contact Lens. 2017
7341	Demographics of patients receiving Intravitreal anti-VEGF treatment in real-world practice: healthcare research data versus randomized controlled trials.	Ziemssen F, Feltgen N, Holz FG, Guthoff R, Ringwald A, Bertelmann T, Wiedon A, Korb C; OCEAN study group..	BMC Ophthalmol. 2017 Jan 19;17(1):7. doi: 10.1186/s12886-017-0401-y.	BMC Ophthalmol		2017			0.0193103		doi: 10.1186/s12886-017-0401-y	28103831					0			0				0	0		doi: 10.1186/s12886-017-0401-y	Ziemssen F, Feltgen N, Holz FG, Guthoff R, Ringwald A, Bertelmann T, Wiedon A, Korb C; OCEAN study group.., Demographics of patients receiving Intravitreal anti-VEGF treatment in real-world practice: healthcare research data versus randomized controlled trials. BMC Ophthalmol. 2017
4209	Diffusion Restriction in the Optic Nerve and Retina in Patients With Carotid Occlusion.	Vicente M, Serrano AR, Falgàs N, Borrego S, Amaro S, Cardenal C, Urra X.	Neurologist. 2017 May;22(3):77-79. doi: 10.1097/NRL.0000000000000113.	Neurologist		2017			0.0193243		doi: 10.1097/NRL.0000000000000113	28471894					0			0				0	0		doi: 10.1097/NRL.0000000000000113	Vicente M, Serrano AR, Falgàs N, Borrego S, Amaro S, Cardenal C, Urra X., Diffusion Restriction in the Optic Nerve and Retina in Patients With Carotid Occlusion. Neurologist. 2017
539	Cutaneous sarcoidosis and secondary open-angle glaucoma in a patient: case report and literature review.	Deng Q, Ding S, Yang S, Huang J.	An Bras Dermatol. 2017 May-Jun;92(3):407-409. doi: 10.1590/abd1806-4841.20175368. Review.	An Bras Dermatol		2017			0.0194712		doi: 10.1590/abd1806-4841.20175368	29186261					0			0				0	0		doi: 10.1590/abd1806-4841.20175368	Deng Q, Ding S, Yang S, Huang J., Cutaneous sarcoidosis and secondary open-angle glaucoma in a patient: case report and literature review. An Bras Dermatol. 2017
5705	The Brazilian Amazon Region Eye Survey: Design and Methods.	Salomão SR, Furtado JM, Berezovsky A, Cavascan NN, Ferraz AN Jr, Cohen JM, Muñoz S, Belfort R Jr.	Ophthalmic Epidemiol. 2017 Aug;24(4):257-264. doi: 10.1080/09286586.2016.1276199. Epub 2017 Mar 15.	Ophthalmic Epidemiol		2017			0.0195635		doi: 10.1080/09286586.2016.1276199	28296523					0			0				0	0		doi: 10.1080/09286586.2016.1276199	Salomão SR, Furtado JM, Berezovsky A, Cavascan NN, Ferraz AN Jr, Cohen JM, Muñoz S, Belfort R Jr., The Brazilian Amazon Region Eye Survey: Design and Methods. Ophthalmic Epidemiol. 2017
3539	Microperimetric evaluation in patients with adult-onset foveomacular vitelliform dystrophy.	Grenga PL, Fragiotta S, Cutini A, Meduri A, Vingolo EM.	Indian J Ophthalmol. 2017 May;65(5):385-389. doi: 10.4103/ijo.IJO_984_16.	Indian J Ophthalmol		2017			0.019658		doi: 10.4103/ijo.IJO_984_16	28573994					0			0				0	0		doi: 10.4103/ijo.IJO_984_16	Grenga PL, Fragiotta S, Cutini A, Meduri A, Vingolo EM., Microperimetric evaluation in patients with adult-onset foveomacular vitelliform dystrophy. Indian J Ophthalmol. 2017
3974	Adaptive Optics Scanning Laser Ophthalmoscopy and Multimodal Imaging of Peau D'Orange in Pseudoxanthoma Elasticum.	Onishi AC, Nesper PL, Fawzi AA.	Ophthalmic Surg Lasers Imaging Retina. 2017 May 1;48(5):436-440. doi: 10.3928/23258160-20170428-12.	Ophthalmic Surg Lasers Imaging Retina		2017			0.0197437		doi: 10.3928/23258160-20170428-12	28499057					0			0				0	0		doi: 10.3928/23258160-20170428-12	Onishi AC, Nesper PL, Fawzi AA., Adaptive Optics Scanning Laser Ophthalmoscopy and Multimodal Imaging of Peau D'Orange in Pseudoxanthoma Elasticum. Ophthalmic Surg Lasers Imaging Retina. 2017
10727	Asymmetry of Retinal Nerve Fiber Layer and Posterior Pole Asymmetry Analysis Parameters of Spectral Domain Optical Coherence Tomography in Children.	Dave P, Jethani J, Shah J.	Semin Ophthalmol. 2017;32(4):443-448. doi: 10.3109/08820538.2015.1119857. Epub 2016 Apr 14.	Semin Ophthalmol		2017			0.0197975		doi: 10.3109/08820538.2015.1119857	27078513					0			0				0	0		doi: 10.3109/08820538.2015.1119857	Dave P, Jethani J, Shah J., Asymmetry of Retinal Nerve Fiber Layer and Posterior Pole Asymmetry Analysis Parameters of Spectral Domain Optical Coherence Tomography in Children. Semin Ophthalmol. 2017
962	Transcanalicular Diode Laser-assisted Dacryocystorhinostomy for the Treatment of Primary Acquired Nasolacrimal Duct Obstruction.	Mor JM, Guo Y, Koch KR, Heindl LM.	J Vis Exp. 2017 Oct 13;(128). doi: 10.3791/55981.	J Vis Exp		2017			0.0198114		doi: 10.3791/55981	29053675					0			0				0	0		doi: 10.3791/55981	Mor JM, Guo Y, Koch KR, Heindl LM., Transcanalicular Diode Laser-assisted Dacryocystorhinostomy for the Treatment of Primary Acquired Nasolacrimal Duct Obstruction. J Vis Exp. 2017
6920	Evisceration in patients with Sturge-Weber syndrome.	Merritt H, Pfeiffer ML, Phillips ME, Richani K.	Orbit. 2017 Feb;36(1):48-51. doi: 10.1080/01676830.2017.1279643. Epub 2017 Feb 1. Review.	Orbit		2017			0.0198746		doi: 10.1080/01676830.2017.1279643	28146369					0			0				0	0		doi: 10.1080/01676830.2017.1279643	Merritt H, Pfeiffer ML, Phillips ME, Richani K., Evisceration in patients with Sturge-Weber syndrome. Orbit. 2017
10995	Successful Treatment of Extensive Squamous Cell Carcinoma of the Conjunctiva and Upper Eyelid Skin With Topical Therapy Alone.	Huang G, Mirani N, Connally A, Langer PD.	Ophthal Plast Reconstr Surg. 2017 May/Jun;33(3S Suppl 1):S4-S6. doi: 10.1097/IOP.0000000000000601.	Ophthal Plast Reconstr Surg		2017			0.0198956		doi: 10.1097/IOP.0000000000000601	26669290					0			0				0	0		doi: 10.1097/IOP.0000000000000601	Huang G, Mirani N, Connally A, Langer PD., Successful Treatment of Extensive Squamous Cell Carcinoma of the Conjunctiva and Upper Eyelid Skin With Topical Therapy Alone. Ophthal Plast Reconstr Surg. 2017
9514	An endogenous foreign body found after subconjunctival hemorrhage.	Sze E, Finefrock D, Rosenberg N, Rosenberg M.	Am J Emerg Med. 2017 Feb;35(2):376.e3-376.e4. doi: 10.1016/j.ajem.2016.08.010. Epub 2016 Aug 7. No abstract available.	Am J Emerg Med		2017			0.0201254		doi: 10.1016/j.ajem.2016.08.010	27666755					0			0				0	0		doi: 10.1016/j.ajem.2016.08.010	Sze E, Finefrock D, Rosenberg N, Rosenberg M., An endogenous foreign body found after subconjunctival hemorrhage. Am J Emerg Med. 2017
8628	Tubular aggregate myopathy with features of Stormorken disease due to a new STIM1 mutation.	Noury JB, Böhm J, Peche GA, Guyant-Marechal L, Bedat-Millet AL, Chiche L, Carlier RY, Malfatti E, Romero NB, Stojkovic T.	Neuromuscul Disord. 2017 Jan;27(1):78-82. doi: 10.1016/j.nmd.2016.10.006. Epub 2016 Oct 14.	Neuromuscul Disord		2017			0.0201449		doi: 10.1016/j.nmd.2016.10.006	27876257					0			0				0	0		doi: 10.1016/j.nmd.2016.10.006	Noury JB, Böhm J, Peche GA, Guyant-Marechal L, Bedat-Millet AL, Chiche L, Carlier RY, Malfatti E, Romero NB, Stojkovic T., Tubular aggregate myopathy with features of Stormorken disease due to a new STIM1 mutation. Neuromuscul Disord. 2017
10382	Microbiological Isolates and Antibiotic Susceptibilities: A 10-Year Review of Culture-Proven Endophthalmitis Cases.	Liu C, Ji J, Li S, Wang Z, Tang L, Cao W, Sun X.	Curr Eye Res. 2017 Mar;42(3):443-447. doi: 10.1080/02713683.2016.1188118. Epub 2016 Jun 27.	Curr Eye Res		2017			0.0204473		doi: 10.1080/02713683.2016.1188118	27347700					0			0				0	0		doi: 10.1080/02713683.2016.1188118	Liu C, Ji J, Li S, Wang Z, Tang L, Cao W, Sun X., Microbiological Isolates and Antibiotic Susceptibilities: A 10-Year Review of Culture-Proven Endophthalmitis Cases. Curr Eye Res. 2017
3142	MR Imaging of the Anterior Visual Pathway in Primary Open-Angle Glaucoma: Correlation with Octopus 101 Perimetry and Spectralis Optical Coherence Tomography Findings.	Ersoz MG, Pekcevik Y, Ayintap E, Gunes İB, Mart DK, Yucel E, Türe G.	Curr Eye Res. 2017 Jul;42(7):995-1001. doi: 10.1080/02713683.2017.1279633. Epub 2017 Feb 28.	Curr Eye Res		2017			0.0205272		doi: 10.1080/02713683.2017.1279633	28632031					0			0				0	0		doi: 10.1080/02713683.2017.1279633	Ersoz MG, Pekcevik Y, Ayintap E, Gunes İB, Mart DK, Yucel E, Türe G., MR Imaging of the Anterior Visual Pathway in Primary Open-Angle Glaucoma: Correlation with Octopus 101 Perimetry and Spectralis Optical Coherence Tomography Findings. Curr Eye Res. 2017
3488	Proteome-wide Identification of Glycosylation-dependent Interactors of Galectin-1 and Galectin-3 on Mesenchymal Retinal Pigment Epithelial (RPE) Cells.	Obermann J, Priglinger CS, Merl-Pham J, Geerlof A, Priglinger S, Götz M, Hauck SM.	Mol Cell Proteomics. 2017 Aug;16(8):1528-1546. doi: 10.1074/mcp.M116.066381. Epub 2017 Jun 2.	Mol Cell Proteomics		2017			0.020764		doi: 10.1074/mcp.M116.066381	28576849					0			0				0	0		doi: 10.1074/mcp.M116.066381	Obermann J, Priglinger CS, Merl-Pham J, Geerlof A, Priglinger S, Götz M, Hauck SM., Proteome-wide Identification of Glycosylation-dependent Interactors of Galectin-1 and Galectin-3 on Mesenchymal Retinal Pigment Epithelial (RPE) Cells. Mol Cell Proteomics. 2017
4896	Neuro-ophthalmologic manifestations in systemic lupus erythematosus.	de Andrade FA, Guimarães Moreira Balbi G, Bortoloti de Azevedo LG, Provenzano Sá G, Vieira de Moraes Junior H, Mendes Klumb E, Abramino Levy R.	Lupus. 2017 Apr;26(5):522-528. doi: 10.1177/0961203316683265. Review.	Lupus		2017			0.0208067		doi: 10.1177/0961203316683265	28394224					0			0				0	0		doi: 10.1177/0961203316683265	de Andrade FA, Guimarães Moreira Balbi G, Bortoloti de Azevedo LG, Provenzano Sá G, Vieira de Moraes Junior H, Mendes Klumb E, Abramino Levy R., Neuro-ophthalmologic manifestations in systemic lupus erythematosus. Lupus. 2017
6100	Three-Dimensional Printing of a Transconjunctival Vitrectomy Trocar-Cannula System.	Navajas EV, Ten Hove M.	Ophthalmologica. 2017;237(2):119-122. doi: 10.1159/000457807. Epub 2017 Mar 2.	Ophthalmologica		2017			0.0208201		doi: 10.1159/000457807	28249289					0			0				0	0		doi: 10.1159/000457807	Navajas EV, Ten Hove M., Three-Dimensional Printing of a Transconjunctival Vitrectomy Trocar-Cannula System. Ophthalmologica. 2017
10035	PEMBROLIZUMAB ADMINISTRATION ASSOCIATED WITH POSTERIOR UVEITIS.	Aaberg MT, Aaberg TM Jr.	Retin Cases Brief Rep. 2017 Fall;11(4):348-351. doi: 10.1097/ICB.0000000000000368.	Retin Cases Brief Rep		2017			0.0208709		doi: 10.1097/ICB.0000000000000368	27490976					0			0				0	0		doi: 10.1097/ICB.0000000000000368	Aaberg MT, Aaberg TM Jr., PEMBROLIZUMAB ADMINISTRATION ASSOCIATED WITH POSTERIOR UVEITIS. Retin Cases Brief Rep. 2017
9811	Agreement among ophthalmologists in marking the optic disc and optic cup in fundus images.	Almazroa A, Alodhayb S, Osman E, Ramadan E, Hummadi M, Dlaim M, Alkatee M, Raahemifar K, Lakshminarayanan V.	Int Ophthalmol. 2017 Jun;37(3):701-717. doi: 10.1007/s10792-016-0329-x. Epub 2016 Aug 30.	Int Ophthalmol		2017			0.0208763		doi: 10.1007/s10792-016-0329-x	27573541					0			0				0	0		doi: 10.1007/s10792-016-0329-x	Almazroa A, Alodhayb S, Osman E, Ramadan E, Hummadi M, Dlaim M, Alkatee M, Raahemifar K, Lakshminarayanan V., Agreement among ophthalmologists in marking the optic disc and optic cup in fundus images. Int Ophthalmol. 2017
5252	Development of visual field defect after first-detected optic disc hemorrhage in preperimetric open-angle glaucoma.	Kim HJ, Song YJ, Kim YK, Jeoung JW, Park KH.	Jpn J Ophthalmol. 2017 Jul;61(4):307-313. doi: 10.1007/s10384-017-0509-x. Epub 2017 Mar 29.	Jpn J Ophthalmol		2017			0.0209346		doi: 10.1007/s10384-017-0509-x	28357611					0			0				0	0		doi: 10.1007/s10384-017-0509-x	Kim HJ, Song YJ, Kim YK, Jeoung JW, Park KH., Development of visual field defect after first-detected optic disc hemorrhage in preperimetric open-angle glaucoma. Jpn J Ophthalmol. 2017
2557	Multiplexing Prisms for Field Expansion.	Peli E, Jung JH.	Optom Vis Sci. 2017 Aug;94(8):817-829. doi: 10.1097/OPX.0000000000001102.	Optom Vis Sci		2017			0.0209623		doi: 10.1097/OPX.0000000000001102	28727615					0			0				0	0		doi: 10.1097/OPX.0000000000001102	Peli E, Jung JH., Multiplexing Prisms for Field Expansion. Optom Vis Sci. 2017
1086	Design and synthesis of benzimidazole-based Rho kinase inhibitors for the treatment of glaucoma.	Abbhi V, Saini L, Mishra S, Sethi G, Kumar AP, Piplani P.	Bioorg Med Chem. 2017 Nov 1;25(21):6071-6085. doi: 10.1016/j.bmc.2017.09.045. Epub 2017 Oct 4.	Bioorg Med Chem		2017			0.0213092		doi: 10.1016/j.bmc.2017.09.045	29033348					0			0				0	0		doi: 10.1016/j.bmc.2017.09.045	Abbhi V, Saini L, Mishra S, Sethi G, Kumar AP, Piplani P., Design and synthesis of benzimidazole-based Rho kinase inhibitors for the treatment of glaucoma. Bioorg Med Chem. 2017
4246	Inflammatory signals from photoreceptor modulate pathological retinal angiogenesis via c-Fos.	Sun Y, Lin Z, Liu CH, Gong Y, Liegl R, Fredrick TW, Meng SS, Burnim SB, Wang Z, Akula JD, Pu WT, Chen J, Smith LEH.	J Exp Med. 2017 Jun 5;214(6):1753-1767. doi: 10.1084/jem.20161645. Epub 2017 May 2.	J Exp Med		2017			0.0213124		doi: 10.1084/jem.20161645	28465464					0			0				0	0		doi: 10.1084/jem.20161645	Sun Y, Lin Z, Liu CH, Gong Y, Liegl R, Fredrick TW, Meng SS, Burnim SB, Wang Z, Akula JD, Pu WT, Chen J, Smith LEH., Inflammatory signals from photoreceptor modulate pathological retinal angiogenesis via c-Fos. J Exp Med. 2017
76	Pre-treatment clinical features in central retinal vein occlusion that predict visual outcome following intravitreal ranibizumab.	Brogan K, Precup M, Rodger A, Young D, Gilmour DF.	BMC Ophthalmol. 2018 Feb 9;18(1):37. doi: 10.1186/s12886-018-0701-x.	BMC Ophthalmol		2018			0.0216695		doi: 10.1186/s12886-018-0701-x	29426292					0			0				0	0		doi: 10.1186/s12886-018-0701-x	Brogan K, Precup M, Rodger A, Young D, Gilmour DF., Pre-treatment clinical features in central retinal vein occlusion that predict visual outcome following intravitreal ranibizumab. BMC Ophthalmol. 2018
5094	Patterns of glaucoma progression in retinal nerve fiber and macular ganglion cell-inner plexiform layer in spectral-domain optical coherence tomography.	Kim HJ, Jeoung JW, Yoo BW, Kim HC, Park KH.	Jpn J Ophthalmol. 2017 Jul;61(4):324-333. doi: 10.1007/s10384-017-0511-3. Epub 2017 Apr 3.	Jpn J Ophthalmol		2017			0.0218578		doi: 10.1007/s10384-017-0511-3	28374270					0			0				0	0		doi: 10.1007/s10384-017-0511-3	Kim HJ, Jeoung JW, Yoo BW, Kim HC, Park KH., Patterns of glaucoma progression in retinal nerve fiber and macular ganglion cell-inner plexiform layer in spectral-domain optical coherence tomography. Jpn J Ophthalmol. 2017
941	Ly6C(hi) monocytes are required for mesenchymal stem/stromal cell-induced immune tolerance in mice with experimental autoimmune uveitis.	Ko JH, Lee HJ, Jeong HJ, Oh JY.	Biochem Biophys Res Commun. 2017 Dec 9;494(1-2):6-12. doi: 10.1016/j.bbrc.2017.10.097. Epub 2017 Oct 19.	Biochem Biophys Res Commun		2017			0.021865		doi: 10.1016/j.bbrc.2017.10.097	29056505					0			0				0	0		doi: 10.1016/j.bbrc.2017.10.097	Ko JH, Lee HJ, Jeong HJ, Oh JY., Ly6C(hi) monocytes are required for mesenchymal stem/stromal cell-induced immune tolerance in mice with experimental autoimmune uveitis. Biochem Biophys Res Commun. 2017
969	The L1 adhesion molecule normalizes neuritogenesis in Rett syndrome-derived neural precursor cells.	Yoo M, Carromeu C, Kwon O, Muotri A, Schachner M.	Biochem Biophys Res Commun. 2017 Dec 16;494(3-4):504-510. doi: 10.1016/j.bbrc.2017.10.073. Epub 2017 Oct 16.	Biochem Biophys Res Commun		2017			0.0218843		doi: 10.1016/j.bbrc.2017.10.073	29050935					0			0				0	0		doi: 10.1016/j.bbrc.2017.10.073	Yoo M, Carromeu C, Kwon O, Muotri A, Schachner M., The L1 adhesion molecule normalizes neuritogenesis in Rett syndrome-derived neural precursor cells. Biochem Biophys Res Commun. 2017
9890	Short-term effect of aflibercept on visual acuity and central macular thickness in patients not responding to ranibizumab and bevacizumab.	Maksys S, Richter-Müksch S, Weingessel B, Vécsei-Marlovits PV.	Wien Klin Wochenschr. 2017 May;129(9-10):351-357. doi: 10.1007/s00508-016-1055-0. Epub 2016 Aug 22. Review.	Wien Klin Wochenschr		2017			0.0219139		doi: 10.1007/s00508-016-1055-0	27550436					0			0				0	0		doi: 10.1007/s00508-016-1055-0	Maksys S, Richter-Müksch S, Weingessel B, Vécsei-Marlovits PV., Short-term effect of aflibercept on visual acuity and central macular thickness in patients not responding to ranibizumab and bevacizumab. Wien Klin Wochenschr. 2017
6463	Parasitic worm may trigger mystery nodding syndrome.	Vogel G.	Science. 2017 Feb 17;355(6326):678. doi: 10.1126/science.355.6326.678. No abstract available.	Science		2017			0.0219763		doi: 10.1126/science.355.6326.678	28209852					0			0				0	0		doi: 10.1126/science.355.6326.678	Vogel G., Parasitic worm may trigger mystery nodding syndrome. Science. 2017
7417	Commentary on: Lower Eyelid Retraction Surgery Without Internal Spacer Graft.	Scawn RL, Joshi N.	Aesthet Surg J. 2017 Feb;37(2):140-142. doi: 10.1093/asj/sjw244. No abstract available.	Aesthet Surg J		2017			0.0219781		doi: 10.1093/asj/sjw244	28096116					0			0				0	0		doi: 10.1093/asj/sjw244	Scawn RL, Joshi N., Commentary on: Lower Eyelid Retraction Surgery Without Internal Spacer Graft. Aesthet Surg J. 2017
5604	Childhood-onset Leber hereditary optic neuropathy.	Majander A, Bowman R, Poulton J, Antcliff RJ, Reddy MA, Michaelides M, Webster AR, Chinnery PF, Votruba M, Moore AT, Yu-Wai-Man P.	Br J Ophthalmol. 2017 Nov;101(11):1505-1509. doi: 10.1136/bjophthalmol-2016-310072. Epub 2017 Mar 17.	Br J Ophthalmol		2017			0.0219834		doi: 10.1136/bjophthalmol-2016-310072	28314831					0			0				0	0		doi: 10.1136/bjophthalmol-2016-310072	Majander A, Bowman R, Poulton J, Antcliff RJ, Reddy MA, Michaelides M, Webster AR, Chinnery PF, Votruba M, Moore AT, Yu-Wai-Man P., Childhood-onset Leber hereditary optic neuropathy. Br J Ophthalmol. 2017
10394	Short- and Long-Term Changes in Corneal Aberrations and Axial Length Induced by Orthokeratology in Children Are Not Correlated.	Santodomingo-Rubido J, Villa-Collar C, Gilmartin B, Gutiérrez-Ortega R, Suzaki A.	Eye Contact Lens. 2017 Nov;43(6):358-363. doi: 10.1097/ICL.0000000000000290.	Eye Contact Lens		2017			0.0219841		doi: 10.1097/ICL.0000000000000290	27341092					0			0				0	0		doi: 10.1097/ICL.0000000000000290	Santodomingo-Rubido J, Villa-Collar C, Gilmartin B, Gutiérrez-Ortega R, Suzaki A., Short- and Long-Term Changes in Corneal Aberrations and Axial Length Induced by Orthokeratology in Children Are Not Correlated. Eye Contact Lens. 2017
9904	Viewing the choroid: where we stand, challenges and contradictions in diabetic retinopathy and diabetic macular oedema.	Campos A, Campos EJ, Martins J, Ambrósio AF, Silva R.	Acta Ophthalmol. 2017 Aug;95(5):446-459. doi: 10.1111/aos.13210. Epub 2016 Aug 22. Review.	Acta Ophthalmol		2017			0.0219858		doi: 10.1111/aos.13210	27545332					0			0				0	0		doi: 10.1111/aos.13210	Campos A, Campos EJ, Martins J, Ambrósio AF, Silva R., Viewing the choroid: where we stand, challenges and contradictions in diabetic retinopathy and diabetic macular oedema. Acta Ophthalmol. 2017
6057	Evaluation of moderate and severe blepharoptosis correction using the interdigitated part of the frontalis muscle and orbicularis oculi muscle suspension technique: A cohort study of 235 cases.	Wang T, Li X, Wang X, Wang Q, Li W, Zhou L, Song W, Wang J.	J Plast Reconstr Aesthet Surg. 2017 May;70(5):692-698. doi: 10.1016/j.bjps.2016.10.013. Epub 2016 Nov 16.	J Plast Reconstr Aesthet Surg		2017			0.0220533		doi: 10.1016/j.bjps.2016.10.013	28254497					0			0				0	0		doi: 10.1016/j.bjps.2016.10.013	Wang T, Li X, Wang X, Wang Q, Li W, Zhou L, Song W, Wang J., Evaluation of moderate and severe blepharoptosis correction using the interdigitated part of the frontalis muscle and orbicularis oculi muscle suspension technique: A cohort study of 235 cases. J Plast Reconstr Aesthet Surg. 2017
2217	Optical Coherence Tomography Analysis Based Prediction of Humphrey 24-2 Visual Field Thresholds in Patients With Glaucoma.	Guo Z, Kwon YH, Lee K, Wang K, Wahle A, Alward WLM, Fingert JH, Bettis DI, Johnson CA, Garvin MK, Sonka M, Abràmoff MD.	Invest Ophthalmol Vis Sci. 2017 Aug 1;58(10):3975-3985. doi: 10.1167/iovs.17-21832.	Invest Ophthalmol Vis Sci		2017			0.0222791		doi: 10.1167/iovs.17-21832	28796875					0			0				0	0		doi: 10.1167/iovs.17-21832	Guo Z, Kwon YH, Lee K, Wang K, Wahle A, Alward WLM, Fingert JH, Bettis DI, Johnson CA, Garvin MK, Sonka M, Abràmoff MD., Optical Coherence Tomography Analysis Based Prediction of Humphrey 24-2 Visual Field Thresholds in Patients With Glaucoma. Invest Ophthalmol Vis Sci. 2017
3972	The Diabetic Retinopathy Barometer Study: Global perspectives on access to and experiences of diabetic retinopathy screening and treatment.	Cavan D, Makaroff L, da Rocha Fernandes J, Sylvanowicz M, Ackland P, Conlon J, Chaney D, Malhi A, Barratt J.	Diabetes Res Clin Pract. 2017 Jul;129:16-24. doi: 10.1016/j.diabres.2017.03.023. Epub 2017 Apr 4.	Diabetes Res Clin Pract		2017			0.0222828		doi: 10.1016/j.diabres.2017.03.023	28499163					0			0				0	0		doi: 10.1016/j.diabres.2017.03.023	Cavan D, Makaroff L, da Rocha Fernandes J, Sylvanowicz M, Ackland P, Conlon J, Chaney D, Malhi A, Barratt J., The Diabetic Retinopathy Barometer Study: Global perspectives on access to and experiences of diabetic retinopathy screening and treatment. Diabetes Res Clin Pract. 2017
6197	Three-Dimensional Eye Shape, Myopic Maculopathy, and Visual Acuity: The Zhongshan Ophthalmic Center-Brien Holden Vision Institute High Myopia Cohort Study.	Guo X, Xiao O, Chen Y, Wu H, Chen L, Morgan IG, He M.	Ophthalmology. 2017 May;124(5):679-687. doi: 10.1016/j.ophtha.2017.01.009. Epub 2017 Feb 23.	Ophthalmology		2017			0.022321		doi: 10.1016/j.ophtha.2017.01.009	28237427					0			0				0	0		doi: 10.1016/j.ophtha.2017.01.009	Guo X, Xiao O, Chen Y, Wu H, Chen L, Morgan IG, He M., Three-Dimensional Eye Shape, Myopic Maculopathy, and Visual Acuity: The Zhongshan Ophthalmic Center-Brien Holden Vision Institute High Myopia Cohort Study. Ophthalmology. 2017
7967	Methods for In Vitro Analysis of Antimicrobial Activity and Toxicity of Anti-keratitis Peptides: Bacterial Viability in Tears, MTT, and TNF-α Release Assays.	Cappiello F, Casciaro B, Kolar SS, Baidouri H, McDermott AM, Mangoni ML.	Methods Mol Biol. 2017;1548:395-409. doi: 10.1007/978-1-4939-6737-7_29.	Methods Mol Biol		2017			0.0223586		doi: 10.1007/978-1-4939-6737-7_29	28013521					0			0				0	0		doi: 10.1007/978-1-4939-6737-7_29	Cappiello F, Casciaro B, Kolar SS, Baidouri H, McDermott AM, Mangoni ML., Methods for In Vitro Analysis of Antimicrobial Activity and Toxicity of Anti-keratitis Peptides: Bacterial Viability in Tears, MTT, and TNF-α Release Assays. Methods Mol Biol. 2017
5016	Progressive visual disturbance and enlarging prolactinoma caused by melanoma metastasis: A case report and literature review.	Yang C, Liu L, Lan X, Zhang S, Li X, Zhang B.	Medicine (Baltimore). 2017 Apr;96(14):e6483. doi: 10.1097/MD.0000000000006483. Review.	Medicine (Baltimore)		2017			0.0223768		doi: 10.1097/MD.0000000000006483	28383413					0			0				0	0		doi: 10.1097/MD.0000000000006483	Yang C, Liu L, Lan X, Zhang S, Li X, Zhang B., Progressive visual disturbance and enlarging prolactinoma caused by melanoma metastasis: A case report and literature review. Medicine (Baltimore). 2017
10611	CHRONICALLY PROGRESSIVE SARCOID GRANULOMA IN AN ASYMPTOMATIC PATIENT.	Stefater JA, Gragoudas ES.	Retin Cases Brief Rep. 2017 Spring;11(2):183-185. doi: 10.1097/ICB.0000000000000325.	Retin Cases Brief Rep		2017			0.0224143		doi: 10.1097/ICB.0000000000000325	27164505					0			0				0	0		doi: 10.1097/ICB.0000000000000325	Stefater JA, Gragoudas ES., CHRONICALLY PROGRESSIVE SARCOID GRANULOMA IN AN ASYMPTOMATIC PATIENT. Retin Cases Brief Rep. 2017
5114	Visual impairment certification due to diabetic retinopathy in North and Eastern Devon.	Lin S, Gupta B, James N, Ling RH.	Acta Ophthalmol. 2017 Dec;95(8):e756-e762. doi: 10.1111/aos.13400. Epub 2017 Apr 1.	Acta Ophthalmol		2017			0.0224388		doi: 10.1111/aos.13400	28371403					0			0				0	0		doi: 10.1111/aos.13400	Lin S, Gupta B, James N, Ling RH., Visual impairment certification due to diabetic retinopathy in North and Eastern Devon. Acta Ophthalmol. 2017
7945	Hyperdynamic Right Heart Function in Graves' Hyperthyroidism Measured by Echocardiography Normalises on Restoration of Euthyroidism.	Teasdale SL, Inder WJ, Stowasser M, Stanton T.	Heart Lung Circ. 2017 Jun;26(6):580-585. doi: 10.1016/j.hlc.2016.10.007. Epub 2016 Nov 19.	Heart Lung Circ		2017			0.0224485		doi: 10.1016/j.hlc.2016.10.007	28025026					0			0				0	0		doi: 10.1016/j.hlc.2016.10.007	Teasdale SL, Inder WJ, Stowasser M, Stanton T., Hyperdynamic Right Heart Function in Graves' Hyperthyroidism Measured by Echocardiography Normalises on Restoration of Euthyroidism. Heart Lung Circ. 2017
4809	Retinal microvascular alterations related to diabetes assessed by optical coherence tomography angiography: A cross-sectional analysis.	Gozlan J, Ingrand P, Lichtwitz O, Cazet-Supervielle A, Benoudis L, Boissonnot M, Hadjadj S, Leveziel N.	Medicine (Baltimore). 2017 Apr;96(15):e6427. doi: 10.1097/MD.0000000000006427.	Medicine (Baltimore)		2017			0.0224821		doi: 10.1097/MD.0000000000006427	28403072					0			0				0	0		doi: 10.1097/MD.0000000000006427	Gozlan J, Ingrand P, Lichtwitz O, Cazet-Supervielle A, Benoudis L, Boissonnot M, Hadjadj S, Leveziel N., Retinal microvascular alterations related to diabetes assessed by optical coherence tomography angiography: A cross-sectional analysis. Medicine (Baltimore). 2017
4552	Management of a case of myopic foveoschisis with phakic intraocular lens (pIOL) in situ: intraoperative challenges.	Kumar A, Mehta A, Ravani RD, Kakkar P.	BMJ Case Rep. 2017 Apr 20;2017. pii: bcr-2016-218224. doi: 10.1136/bcr-2016-218224.	BMJ Case Rep		2017			0.0225305		doi: 10.1136/bcr-2016-218224	28432184					0			0				0	0		doi: 10.1136/bcr-2016-218224	Kumar A, Mehta A, Ravani RD, Kakkar P., Management of a case of myopic foveoschisis with phakic intraocular lens (pIOL) in situ: intraoperative challenges. BMJ Case Rep. 2017
885	Corneal Mesenchymal Stromal Cells Are Directly Antiangiogenic via PEDF and sFLT-1.	Eslani M, Putra I, Shen X, Hamouie J, Afsharkhamseh N, Besharat S, Rosenblatt MI, Dana R, Hematti P, Djalilian AR.	Invest Ophthalmol Vis Sci. 2017 Oct 1;58(12):5507-5517. doi: 10.1167/iovs.17-22680.	Invest Ophthalmol Vis Sci		2017			0.0225419		doi: 10.1167/iovs.17-22680	29075761					0			0				0	0		doi: 10.1167/iovs.17-22680	Eslani M, Putra I, Shen X, Hamouie J, Afsharkhamseh N, Besharat S, Rosenblatt MI, Dana R, Hematti P, Djalilian AR., Corneal Mesenchymal Stromal Cells Are Directly Antiangiogenic via PEDF and sFLT-1. Invest Ophthalmol Vis Sci. 2017
10541	Telemedicine for a General Screening of Retinal Disease Using Nonmydriatic Fundus Cameras in Optometry Centers: Three-Year Results.	Zapata MA, Arcos G, Fonollosa A, Abraldes M, Oleñik A, Gutierrez E, Garcia-Arumi J.	Telemed J E Health. 2017 Jan;23(1):30-36. doi: 10.1089/tmj.2016.0020. Epub 2016 May 26.	Telemed J E Health		2017			0.0225614		doi: 10.1089/tmj.2016.0020	27228051					0			0				0	0		doi: 10.1089/tmj.2016.0020	Zapata MA, Arcos G, Fonollosa A, Abraldes M, Oleñik A, Gutierrez E, Garcia-Arumi J., Telemedicine for a General Screening of Retinal Disease Using Nonmydriatic Fundus Cameras in Optometry Centers: Three-Year Results. Telemed J E Health. 2017
197	A homozygous missense variant in VWA2, encoding an interactor of the Fraser-complex, in a patient with vesicoureteral reflux.	van der Ven AT, Kobbe B, Kohl S, Shril S, Pogoda HM, Imhof T, Ityel H, Vivante A, Chen J, Hwang DY, Connaughton DM, Mann N, Widmeier E, Taglienti M, Schmidt JM, Nakayama M, Senguttuvan P, Kumar S, Tasic V, Kehinde EO, Mane SM, Lifton RP, et al.	PLoS One. 2018 Jan 19;13(1):e0191224. doi: 10.1371/journal.pone.0191224. eCollection 2018.	PLoS One		2018			0.0227009		doi: 10.1371/journal.pone.0191224	29351342					0			0				0	0		doi: 10.1371/journal.pone.0191224	van der Ven AT, Kobbe B, Kohl S, Shril S, Pogoda HM, Imhof T, Ityel H, Vivante A, Chen J, Hwang DY, Connaughton DM, Mann N, Widmeier E, Taglienti M, Schmidt JM, Nakayama M, Senguttuvan P, Kumar S, Tasic V, Kehinde EO, Mane SM, Lifton RP, et al., A homozygous missense variant in VWA2, encoding an interactor of the Fraser-complex, in a patient with vesicoureteral reflux. PLoS One. 2018
2469	Long-term prognostic factors of chronic central serous chorioretinopathy after half-dose photodynamic therapy: A 3-year follow-up study.	Haga F, Maruko R, Sato C, Kataoka K, Ito Y, Terasaki H.	PLoS One. 2017 Jul 24;12(7):e0181479. doi: 10.1371/journal.pone.0181479. eCollection 2017.	PLoS One		2017			0.0227498		doi: 10.1371/journal.pone.0181479	28742138					0			0				0	0		doi: 10.1371/journal.pone.0181479	Haga F, Maruko R, Sato C, Kataoka K, Ito Y, Terasaki H., Long-term prognostic factors of chronic central serous chorioretinopathy after half-dose photodynamic therapy: A 3-year follow-up study. PLoS One. 2017
2589	Correlation between the graft-host junction of penetrating keratoplasty by anterior segment-optical coherence tomography and the magnitude of postoperative astigmatism.	Nassar GA, Arfeen SAES.	Indian J Ophthalmol. 2017 Jul;65(7):574-578. doi: 10.4103/ijo.IJO_820_16.	Indian J Ophthalmol		2017			0.022777		doi: 10.4103/ijo.IJO_820_16	28724813					0			0				0	0		doi: 10.4103/ijo.IJO_820_16	Nassar GA, Arfeen SAES., Correlation between the graft-host junction of penetrating keratoplasty by anterior segment-optical coherence tomography and the magnitude of postoperative astigmatism. Indian J Ophthalmol. 2017
2099	Use of phosphodiesterase inhibitors and prevalence of self-reported glaucoma in the United States.	Chen SP, Singh K, Lin SC.	PLoS One. 2017 Aug 17;12(8):e0183388. doi: 10.1371/journal.pone.0183388. eCollection 2017.	PLoS One		2017			0.0228195		doi: 10.1371/journal.pone.0183388	28817686					0			0				0	0		doi: 10.1371/journal.pone.0183388	Chen SP, Singh K, Lin SC., Use of phosphodiesterase inhibitors and prevalence of self-reported glaucoma in the United States. PLoS One. 2017
10882	Conjunctival leishmaniasis in a case of disseminated cutaneous leishmaniasis.	Razeghinejad MR, Monabati A, Kadivar MR, Alborzi A.	Trop Doct. 2017 Jan;47(1):53-55. Epub 2016 Feb 22.	Trop Doct		2017			0.0230533		#VALUE!	26905744					0			0				0	0		#VALUE!	Razeghinejad MR, Monabati A, Kadivar MR, Alborzi A., Conjunctival leishmaniasis in a case of disseminated cutaneous leishmaniasis. Trop Doct. 2017
1148	Endoscopic Transsphenoidal Surgery Outcomes in 331 Nonfunctioning Pituitary Adenoma Cases After a Single Surgeon Learning Curve.	Kim JH, Lee JH, Lee JH, Hong AR, Kim YJ, Kim YH.	World Neurosurg. 2018 Jan;109:e409-e416. doi: 10.1016/j.wneu.2017.09.194. Epub 2017 Oct 7.	World Neurosurg		2018			0.0232422		doi: 10.1016/j.wneu.2017.09.194	29017983					0			0				0	0		doi: 10.1016/j.wneu.2017.09.194	Kim JH, Lee JH, Lee JH, Hong AR, Kim YJ, Kim YH., Endoscopic Transsphenoidal Surgery Outcomes in 331 Nonfunctioning Pituitary Adenoma Cases After a Single Surgeon Learning Curve. World Neurosurg. 2018
9713	The role of laminins in the organization and function of neuromuscular junctions.	Rogers RS, Nishimune H.	Matrix Biol. 2017 Jan;57-58:86-105. doi: 10.1016/j.matbio.2016.08.008. Epub 2016 Sep 7. Review.	Matrix Biol		2017			0.0232772		doi: 10.1016/j.matbio.2016.08.008	27614294					0			0				0	0		doi: 10.1016/j.matbio.2016.08.008	Rogers RS, Nishimune H., The role of laminins in the organization and function of neuromuscular junctions. Matrix Biol. 2017
2658	Acylglycerol Kinase Mutated in Sengers Syndrome Is a Subunit of the TIM22 Protein Translocase in Mitochondria.	Vukotic M, Nolte H, König T, Saita S, Ananjew M, Krüger M, Tatsuta T, Langer T.	Mol Cell. 2017 Aug 3;67(3):471-483.e7. doi: 10.1016/j.molcel.2017.06.013. Epub 2017 Jul 14.	Mol Cell		2017			0.0233115		doi: 10.1016/j.molcel.2017.06.013	28712724					0			0				0	0		doi: 10.1016/j.molcel.2017.06.013	Vukotic M, Nolte H, König T, Saita S, Ananjew M, Krüger M, Tatsuta T, Langer T., Acylglycerol Kinase Mutated in Sengers Syndrome Is a Subunit of the TIM22 Protein Translocase in Mitochondria. Mol Cell. 2017
3236	Diagnostic algorithm for relapsing acquired demyelinating syndromes in children.	Hacohen Y, Mankad K, Chong WK, Barkhof F, Vincent A, Lim M, Wassmer E, Ciccarelli O, Hemingway C.	Neurology. 2017 Jul 18;89(3):269-278. doi: 10.1212/WNL.0000000000004117. Epub 2017 Jun 14.	Neurology		2017			0.0233475		doi: 10.1212/WNL.0000000000004117	28615429					0			0				0	0		doi: 10.1212/WNL.0000000000004117	Hacohen Y, Mankad K, Chong WK, Barkhof F, Vincent A, Lim M, Wassmer E, Ciccarelli O, Hemingway C., Diagnostic algorithm for relapsing acquired demyelinating syndromes in children. Neurology. 2017
3757	Nicking Glaucoma with Nicotinamide?	Liebmann JM, Cioffi GA.	N Engl J Med. 2017 May 25;376(21):2079-2081. doi: 10.1056/NEJMcibr1702486. No abstract available.	N Engl J Med		2017			0.0236454		doi: 10.1056/NEJMcibr1702486	28538117					0			0				0	0		doi: 10.1056/NEJMcibr1702486	Liebmann JM, Cioffi GA., Nicking Glaucoma with Nicotinamide? N Engl J Med. 2017
189	Benefits and Services.	Raduege TJ; Thomson Reuters Accelus...	Issue Brief Health Policy Track Serv. 2017 Dec 26;2017:1-59. No abstract available.	Issue Brief Health Policy Track Serv		2017			0.0236772		#VALUE!	29360311					0			0				0	0		#VALUE!	Raduege TJ; Thomson Reuters Accelus..., Benefits and Services. Issue Brief Health Policy Track Serv. 2017
497	Pediatric ocular disorders and visual handicap in Finland - what do the registers tell?	Gissler M, Ojamo M, Ritvanen A, Uusitalo H.	Duodecim. 2017;133(2):159-66.	Duodecim		2017			0.0237354		#VALUE!	29205016					0			0				0	0		#VALUE!	Gissler M, Ojamo M, Ritvanen A, Uusitalo H., Pediatric ocular disorders and visual handicap in Finland - what do the registers tell? Duodecim. 2017
2019	Neck/shoulder discomfort due to visually demanding experimental near work is influenced by previous neck pain, task duration, astigmatism, internal eye discomfort and accommodation.	Zetterberg C, Forsman M, Richter HO.	PLoS One. 2017 Aug 23;12(8):e0182439. doi: 10.1371/journal.pone.0182439. eCollection 2017.	PLoS One		2017			0.0238458		doi: 10.1371/journal.pone.0182439	28832612					0			0				0	0		doi: 10.1371/journal.pone.0182439	Zetterberg C, Forsman M, Richter HO., Neck/shoulder discomfort due to visually demanding experimental near work is influenced by previous neck pain, task duration, astigmatism, internal eye discomfort and accommodation. PLoS One. 2017
627	Review: Antioxidant vitamin or mineral supplements do not prevent age-related macular degeneration.	Macdonald L.	Ann Intern Med. 2017 Nov 21;167(10):JC56. doi: 10.7326/ACPJC-2017-167-10-056. No abstract available.	Ann Intern Med		2017			0.0238461		doi: 10.7326/ACPJC-2017-167-10-056	29159382					0			0				0	0		doi: 10.7326/ACPJC-2017-167-10-056	Macdonald L., Review: Antioxidant vitamin or mineral supplements do not prevent age-related macular degeneration. Ann Intern Med. 2017
8430	Estimating Optical Coherence Tomography Structural Measurement Floors to Improve Detection of Progression in Advanced Glaucoma.	Bowd C, Zangwill LM, Weinreb RN, Medeiros FA, Belghith A.	Am J Ophthalmol. 2017 Mar;175:37-44. doi: 10.1016/j.ajo.2016.11.010. Epub 2016 Nov 30.	Am J Ophthalmol		2017			0.0238786		doi: 10.1016/j.ajo.2016.11.010	27914978					0			0				0	0		doi: 10.1016/j.ajo.2016.11.010	Bowd C, Zangwill LM, Weinreb RN, Medeiros FA, Belghith A., Estimating Optical Coherence Tomography Structural Measurement Floors to Improve Detection of Progression in Advanced Glaucoma. Am J Ophthalmol. 2017
433	What does IGRA testing add to the diagnosis of ocular tuberculosis? A Bayesian latent class analysis.	Agrawal R, Grant R, Gupta B, Gunasekeran DV, Gonzalez-Lopez JJ, Addison PKF, Westcott M, Pavesio CE.	BMC Ophthalmol. 2017 Dec 8;17(1):245. doi: 10.1186/s12886-017-0597-x.	BMC Ophthalmol		2017			0.0238981		doi: 10.1186/s12886-017-0597-x	29216851					0			0				0	0		doi: 10.1186/s12886-017-0597-x	Agrawal R, Grant R, Gupta B, Gunasekeran DV, Gonzalez-Lopez JJ, Addison PKF, Westcott M, Pavesio CE., What does IGRA testing add to the diagnosis of ocular tuberculosis? A Bayesian latent class analysis. BMC Ophthalmol. 2017
5523	Accommodation Responds to Optical Vergence and Not Defocus Blur Alone.	Del Águila-Carrasco AJ, Marín-Franch I, Bernal-Molina P, Esteve-Taboada JJ, Kruger PB, Montés-Micó R, López-Gil N.	Invest Ophthalmol Vis Sci. 2017 Mar 1;58(3):1758-1763. doi: 10.1167/iovs.16-21280.	Invest Ophthalmol Vis Sci		2017			0.0240043		doi: 10.1167/iovs.16-21280	28324117					0			0				0	0		doi: 10.1167/iovs.16-21280	Del Águila-Carrasco AJ, Marín-Franch I, Bernal-Molina P, Esteve-Taboada JJ, Kruger PB, Montés-Micó R, López-Gil N., Accommodation Responds to Optical Vergence and Not Defocus Blur Alone. Invest Ophthalmol Vis Sci. 2017
4358	Presentation, workup, and management of penetrating transorbital and transnasal injuries: A case report and systematic review.	Ghadersohi S, Ference EH, Detwiller K, Kern RC.	Am J Rhinol Allergy. 2017 Mar 1;31(2):29-34. doi: 10.2500/ajra.2017.31.4421. Review.	Am J Rhinol Allergy		2017			0.0240182		doi: 10.2500/ajra.2017.31.4421	28452700					0			0				0	0		doi: 10.2500/ajra.2017.31.4421	Ghadersohi S, Ference EH, Detwiller K, Kern RC., Presentation, workup, and management of penetrating transorbital and transnasal injuries: A case report and systematic review. Am J Rhinol Allergy. 2017
9075	Management of dislocated intraocular lenses with iris suture.	Faria MY, Ferreira NP, Canastro M.	Eur J Ophthalmol. 2017 Jan 19;27(1):45-48. doi: 10.5301/ejo.5000823. Epub 2016 Jun 23.	Eur J Ophthalmol		2017			0.0240224		doi: 10.5301/ejo.5000823	27338117					0			0				0	0		doi: 10.5301/ejo.5000823	Faria MY, Ferreira NP, Canastro M., Management of dislocated intraocular lenses with iris suture. Eur J Ophthalmol. 2017
7718	Intravitreal Aflibercept for Neovascular Polypoidal Choroidal Vasculopathy in a Predominantly Non-Asian Population: RIVAL Results.	Farooq A, Frazier H, Marcus WB, Fechter C, Singh H, Marcus DM.	Ophthalmic Surg Lasers Imaging Retina. 2017 Jan 1;48(1):34-52. doi: 10.3928/23258160-20161219-05.	Ophthalmic Surg Lasers Imaging Retina		2017			0.0241167		doi: 10.3928/23258160-20161219-05	28060392					0			0				0	0		doi: 10.3928/23258160-20161219-05	Farooq A, Frazier H, Marcus WB, Fechter C, Singh H, Marcus DM., Intravitreal Aflibercept for Neovascular Polypoidal Choroidal Vasculopathy in a Predominantly Non-Asian Population: RIVAL Results. Ophthalmic Surg Lasers Imaging Retina. 2017
7734	Validation of International Chronic Ocular Graft-Versus-Host Disease (GVHD) Group Diagnostic Criteria as a Chronic Ocular GVHD-Specific Metric.	Rapoport Y, Freeman T, Koyama T, Engelhardt BG, Jagasia M, Savani BN, Tran U, Kassim AA.	Cornea. 2017 Feb;36(2):258-263. doi: 10.1097/ICO.0000000000001109.	Cornea		2017			0.0242538		doi: 10.1097/ICO.0000000000001109	28060078					0			0				0	0		doi: 10.1097/ICO.0000000000001109	Rapoport Y, Freeman T, Koyama T, Engelhardt BG, Jagasia M, Savani BN, Tran U, Kassim AA., Validation of International Chronic Ocular Graft-Versus-Host Disease (GVHD) Group Diagnostic Criteria as a Chronic Ocular GVHD-Specific Metric. Cornea. 2017
1653	Primary prevention of ocular injury in agricultural workers with safety eyewear.	Chatterjee S, Agrawal D.	Indian J Ophthalmol. 2017 Sep;65(9):859-864. doi: 10.4103/ijo.IJO_334_17.	Indian J Ophthalmol		2017			0.0243795		doi: 10.4103/ijo.IJO_334_17	28905831					0			0				0	0		doi: 10.4103/ijo.IJO_334_17	Chatterjee S, Agrawal D., Primary prevention of ocular injury in agricultural workers with safety eyewear. Indian J Ophthalmol. 2017
5117	Diurnal expression of proteins in the retina of the blind cone-rod homeobox (Crx(-/-) ) mouse and the 129/Sv mouse: a proteomic study.	Møller M, Rath MF, Ludvigsen M, Honoré B, Vorum H.	Acta Ophthalmol. 2017 Nov;95(7):717-726. doi: 10.1111/aos.13429. Epub 2017 Mar 28.	Acta Ophthalmol		2017			0.024514		doi: 10.1111/aos.13429	28371363					0			0				0	0		doi: 10.1111/aos.13429	Møller M, Rath MF, Ludvigsen M, Honoré B, Vorum H., Diurnal expression of proteins in the retina of the blind cone-rod homeobox (Crx(-/-) ) mouse and the 129/Sv mouse: a proteomic study. Acta Ophthalmol. 2017
9521	Ocular Hypotony in Patients With Juvenile Idiopathic Arthritis-Associated Uveitis.	Böhm MR, Tappeiner C, Breitbach MA, Zurek-Imhoff B, Heinz C, Heiligenhaus A.	Am J Ophthalmol. 2017 Jan;173:45-55. doi: 10.1016/j.ajo.2016.09.018. Epub 2016 Sep 21.	Am J Ophthalmol		2017			0.0246408		doi: 10.1016/j.ajo.2016.09.018	27664701					0			0				0	0		doi: 10.1016/j.ajo.2016.09.018	Böhm MR, Tappeiner C, Breitbach MA, Zurek-Imhoff B, Heinz C, Heiligenhaus A., Ocular Hypotony in Patients With Juvenile Idiopathic Arthritis-Associated Uveitis. Am J Ophthalmol. 2017
222	Iris Abscess.	Chen X, Baumal CR.	N Engl J Med. 2018 Jan 11;378(2):e3. doi: 10.1056/NEJMicm1705033. No abstract available.	N Engl J Med		2018			0.0248948		doi: 10.1056/NEJMicm1705033	29320659					0			0				0	0		doi: 10.1056/NEJMicm1705033	Chen X, Baumal CR., Iris Abscess. N Engl J Med. 2018
6846	Elderly people need an eye examination before entering nursing homes.	Jensen H, Tubæk G.	Dan Med J. 2017 Feb;64(2). pii: A5325.	Dan Med J		2017			0.0249537		#VALUE!	28157061					0			0				0	0		#VALUE!	Jensen H, Tubæk G., Elderly people need an eye examination before entering nursing homes. Dan Med J. 2017
10225	Safety and efficacy of a hydroxypropyl guar/polyethylene glycol/propylene glycol-based lubricant eye-drop in patients with dry eye.	Labetoulle M, Messmer EM, Pisella PJ, Ogundele A, Baudouin C.	Br J Ophthalmol. 2017 Apr;101(4):487-492. doi: 10.1136/bjophthalmol-2016-308608. Epub 2016 Jul 15.	Br J Ophthalmol		2017			0.0250071		doi: 10.1136/bjophthalmol-2016-308608	27422973					0			0				0	0		doi: 10.1136/bjophthalmol-2016-308608	Labetoulle M, Messmer EM, Pisella PJ, Ogundele A, Baudouin C., Safety and efficacy of a hydroxypropyl guar/polyethylene glycol/propylene glycol-based lubricant eye-drop in patients with dry eye. Br J Ophthalmol. 2017
1182	Medial Rectus Bridge Faden Operations in Accommodative and Partially Accommodative Esotropia With Convergence Excess.	Inal A, Ocak OB, Aygit ED, Celik S, Ozturk Karabulut G, Inal B, Taskapili M, Gokyigit B.	J Pediatr Ophthalmol Strabismus. 2017 Nov 1;54(6):369-374. doi: 10.3928/01913913-20170801-03. Epub 2017 Oct 9.	J Pediatr Ophthalmol Strabismus		2017			0.0250327		doi: 10.3928/01913913-20170801-03	28991347					0			0				0	0		doi: 10.3928/01913913-20170801-03	Inal A, Ocak OB, Aygit ED, Celik S, Ozturk Karabulut G, Inal B, Taskapili M, Gokyigit B., Medial Rectus Bridge Faden Operations in Accommodative and Partially Accommodative Esotropia With Convergence Excess. J Pediatr Ophthalmol Strabismus. 2017
6144	Respiratory symptoms are poor predictors of concomitant chronic obstructive pulmonary disease in patients with primary Sjögren's syndrome.	Strevens Bolmgren V, Olsson P, Wollmer P, Hesselstrand R, Mandl T.	Rheumatol Int. 2017 May;37(5):813-818. doi: 10.1007/s00296-017-3678-5. Epub 2017 Feb 27.	Rheumatol Int		2017			0.0250381		doi: 10.1007/s00296-017-3678-5	28243798					0			0				0	0		doi: 10.1007/s00296-017-3678-5	Strevens Bolmgren V, Olsson P, Wollmer P, Hesselstrand R, Mandl T., Respiratory symptoms are poor predictors of concomitant chronic obstructive pulmonary disease in patients with primary Sjögren's syndrome. Rheumatol Int. 2017
9739	Trends over time in the incidence of congenital anophthalmia, microphthalmia and orbital malformation in England: database study.	Dharmasena A, Keenan T, Goldacre R, Hall N, Goldacre MJ.	Br J Ophthalmol. 2017 Jun;101(6):735-739. doi: 10.1136/bjophthalmol-2016-308952. Epub 2016 Sep 6.	Br J Ophthalmol		2017			0.0251026		doi: 10.1136/bjophthalmol-2016-308952	27601422					0			0				0	0		doi: 10.1136/bjophthalmol-2016-308952	Dharmasena A, Keenan T, Goldacre R, Hall N, Goldacre MJ., Trends over time in the incidence of congenital anophthalmia, microphthalmia and orbital malformation in England: database study. Br J Ophthalmol. 2017
10754	Diode laser cyclophotocoagulation in Indian eyes: efficacy and safety.	Singh K, Jain D, Veerwal V.	Int Ophthalmol. 2017 Feb;37(1):79-84. doi: 10.1007/s10792-016-0228-1. Epub 2016 Apr 9.	Int Ophthalmol		2017			0.0251861		doi: 10.1007/s10792-016-0228-1	27061905					0			0				0	0		doi: 10.1007/s10792-016-0228-1	Singh K, Jain D, Veerwal V., Diode laser cyclophotocoagulation in Indian eyes: efficacy and safety. Int Ophthalmol. 2017
9989	VITRECTOMY FOR MACULAR RETINOSCHISIS WITHOUT A DETECTABLE OPTIC DISK PIT.	Haruta M, Yamakawa R.	Retina. 2017 May;37(5):915-920. doi: 10.1097/IAE.0000000000001244.	Retina		2017			0.0252717		doi: 10.1097/IAE.0000000000001244	27508506					0			0				0	0		doi: 10.1097/IAE.0000000000001244	Haruta M, Yamakawa R., VITRECTOMY FOR MACULAR RETINOSCHISIS WITHOUT A DETECTABLE OPTIC DISK PIT. Retina. 2017
8801	Neonatal Fc receptor FcRn is involved in intracellular transport of the Fc fusion protein aflibercept and its transition through retinal endothelial cells.	Deissler HL, Lang GK, Lang GE.	Exp Eye Res. 2017 Jan;154:39-46. doi: 10.1016/j.exer.2016.11.007. Epub 2016 Nov 9.	Exp Eye Res		2017			0.0255459		doi: 10.1016/j.exer.2016.11.007	27836572					0			0				0	0		doi: 10.1016/j.exer.2016.11.007	Deissler HL, Lang GK, Lang GE., Neonatal Fc receptor FcRn is involved in intracellular transport of the Fc fusion protein aflibercept and its transition through retinal endothelial cells. Exp Eye Res. 2017
909	Is atrial fibrillation a risk factor for normal-tension glaucoma?	Zaleska-Żmijewska A, Janiszewski M, Wawrzyniak ZM, Kuch M, Szaflik J, Szaflik JP.	Medicine (Baltimore). 2017 Oct;96(43):e8347. doi: 10.1097/MD.0000000000008347.	Medicine (Baltimore)		2017			0.0260208		doi: 10.1097/MD.0000000000008347	29069012					0			0				0	0		doi: 10.1097/MD.0000000000008347	Zaleska-Żmijewska A, Janiszewski M, Wawrzyniak ZM, Kuch M, Szaflik J, Szaflik JP., Is atrial fibrillation a risk factor for normal-tension glaucoma? Medicine (Baltimore). 2017
599	T-cell differentiation and CD56+ levels in polypoidal choroidal vasculopathy and neovascular age-related macular degeneration.	Subhi Y, Nielsen MK, Molbech CR, Oishi A, Singh A, Nissen MH, Sørensen TL.	Aging (Albany NY). 2017 Nov 20;9(11):2436-2452. doi: 10.18632/aging.101329.	Aging (Albany NY)		2017			0.0260959		doi: 10.18632/aging.101329	29165313					0			0				0	0		doi: 10.18632/aging.101329	Subhi Y, Nielsen MK, Molbech CR, Oishi A, Singh A, Nissen MH, Sørensen TL., T-cell differentiation and CD56+ levels in polypoidal choroidal vasculopathy and neovascular age-related macular degeneration. Aging (Albany NY). 2017
2904	Sodium Iodate Produces a Strain-Dependent Retinal Oxidative Stress Response Measured In Vivo Using QUEST MRI.	Berkowitz BA, Podolsky RH, Lenning J, Khetarpal N, Tran C, Wu JY, Berri AM, Dernay K, Shafie-Khorassani F, Roberts R.	Invest Ophthalmol Vis Sci. 2017 Jun 1;58(7):3286-3293. doi: 10.1167/iovs.17-21850.	Invest Ophthalmol Vis Sci		2017			0.0261745		doi: 10.1167/iovs.17-21850	28666279					0			0				0	0		doi: 10.1167/iovs.17-21850	Berkowitz BA, Podolsky RH, Lenning J, Khetarpal N, Tran C, Wu JY, Berri AM, Dernay K, Shafie-Khorassani F, Roberts R., Sodium Iodate Produces a Strain-Dependent Retinal Oxidative Stress Response Measured In Vivo Using QUEST MRI. Invest Ophthalmol Vis Sci. 2017
5830	Generation of retinal pigmented epithelium from iPSCs derived from the conjunctiva of donors with and without age related macular degeneration.	Geng Z, Walsh PJ, Truong V, Hill C, Ebeling M, Kapphahn RJ, Montezuma SR, Yuan C, Roehrich H, Ferrington DA, Dutton JR.	PLoS One. 2017 Mar 10;12(3):e0173575. doi: 10.1371/journal.pone.0173575. eCollection 2017.	PLoS One		2017			0.0263773		doi: 10.1371/journal.pone.0173575	28282420					0			0				0	0		doi: 10.1371/journal.pone.0173575	Geng Z, Walsh PJ, Truong V, Hill C, Ebeling M, Kapphahn RJ, Montezuma SR, Yuan C, Roehrich H, Ferrington DA, Dutton JR., Generation of retinal pigmented epithelium from iPSCs derived from the conjunctiva of donors with and without age related macular degeneration. PLoS One. 2017
3023	Intra- and interobserver reproducibility of Bruch's membrane opening minimum rim width measurements with spectral domain optical coherence tomography.	Reis ASC, Zangalli CES, Abe RY, Silva AL, Vianna JR, Vasconcellos JPC, Costa VP.	Acta Ophthalmol. 2017 Nov;95(7):e548-e555. doi: 10.1111/aos.13464. Epub 2017 Jun 26.	Acta Ophthalmol		2017			0.0264396		doi: 10.1111/aos.13464	28650590					0			0				0	0		doi: 10.1111/aos.13464	Reis ASC, Zangalli CES, Abe RY, Silva AL, Vianna JR, Vasconcellos JPC, Costa VP., Intra- and interobserver reproducibility of Bruch's membrane opening minimum rim width measurements with spectral domain optical coherence tomography. Acta Ophthalmol. 2017
7266	Cell-based therapeutic strategies for replacement and preservation in retinal degenerative diseases.	Jones MK, Lu B, Girman S, Wang S.	Prog Retin Eye Res. 2017 May;58:1-27. doi: 10.1016/j.preteyeres.2017.01.004. Epub 2017 Jan 19. Review.	Prog Retin Eye Res		2017			0.0264756		doi: 10.1016/j.preteyeres.2017.01.004	28111323					0			0				0	0		doi: 10.1016/j.preteyeres.2017.01.004	Jones MK, Lu B, Girman S, Wang S., Cell-based therapeutic strategies for replacement and preservation in retinal degenerative diseases. Prog Retin Eye Res. 2017
4364	Free-living amoebae isolated in the Central African Republic: epidemiological and molecular aspects.	Farra A, Bekondi C, Tricou V, Mbecko JR, Talarmin A.	Pan Afr Med J. 2017 Feb 1;26:57. doi: 10.11604/pamj.2017.26.57.9021. eCollection 2017.	Pan Afr Med J		2017			0.0264801		doi: 10.11604/pamj.2017.26.57.9021	28451034					0			0				0	0		doi: 10.11604/pamj.2017.26.57.9021	Farra A, Bekondi C, Tricou V, Mbecko JR, Talarmin A., Free-living amoebae isolated in the Central African Republic: epidemiological and molecular aspects. Pan Afr Med J. 2017
6839	Short-Term Vitreoretinal Tamponade with Heavy Liquid Following Surgery for Giant Retinal Tear.	Eiger-Moscovich M, Gershoni A, Axer-Siegel R, Weinberger D, Ehrlich R.	Curr Eye Res. 2017 Jul;42(7):1074-1078. doi: 10.1080/02713683.2016.1266664. Epub 2017 Feb 3.	Curr Eye Res		2017			0.0266119		doi: 10.1080/02713683.2016.1266664	28157410					0			0				0	0		doi: 10.1080/02713683.2016.1266664	Eiger-Moscovich M, Gershoni A, Axer-Siegel R, Weinberger D, Ehrlich R., Short-Term Vitreoretinal Tamponade with Heavy Liquid Following Surgery for Giant Retinal Tear. Curr Eye Res. 2017
8431	Late In-the-Bag Intraocular Lens Dislocation: A Randomized Clinical Trial Comparing Lens Repositioning and Lens Exchange.	Kristianslund O, Råen M, Østern AE, Drolsum L.	Ophthalmology. 2017 Feb;124(2):151-159. doi: 10.1016/j.ophtha.2016.10.024. Epub 2016 Nov 30.	Ophthalmology		2017			0.0267675		doi: 10.1016/j.ophtha.2016.10.024	27914839					0			0				0	0		doi: 10.1016/j.ophtha.2016.10.024	Kristianslund O, Råen M, Østern AE, Drolsum L., Late In-the-Bag Intraocular Lens Dislocation: A Randomized Clinical Trial Comparing Lens Repositioning and Lens Exchange. Ophthalmology. 2017
9136	A Retrospective Analysis of Vision-Impairing Tumors Among 467 Patients with Neurofibromatosis Type 2.	Li P, Wang Z, Zhou Q, Li S, Zhang J, Wang Y, Wang X, Wang B, Zhao F, Liu P, Yang Z.	World Neurosurg. 2017 Jan;97:557-564. doi: 10.1016/j.wneu.2016.10.080. Epub 2016 Oct 21.	World Neurosurg		2017			0.0267774		doi: 10.1016/j.wneu.2016.10.080	27777154					0			0				0	0		doi: 10.1016/j.wneu.2016.10.080	Li P, Wang Z, Zhou Q, Li S, Zhang J, Wang Y, Wang X, Wang B, Zhao F, Liu P, Yang Z., A Retrospective Analysis of Vision-Impairing Tumors Among 467 Patients with Neurofibromatosis Type 2. World Neurosurg. 2017
9354	Evaluation and Management of Acute Acquired Comitant Esotropia in Children.	Gilbert AL, Koo EB, Heidary G.	Semin Ophthalmol. 2017;32(1):8-13. doi: 10.1080/08820538.2016.1228398. Epub 2016 Oct 11. Review.	Semin Ophthalmol		2017			0.0269751		doi: 10.1080/08820538.2016.1228398	27726470					0			0				0	0		doi: 10.1080/08820538.2016.1228398	Gilbert AL, Koo EB, Heidary G., Evaluation and Management of Acute Acquired Comitant Esotropia in Children. Semin Ophthalmol. 2017
4840	Tumors and Related Lesions of the Pigmented Epithelium.	Shields JA, Shields CL.	Asia Pac J Ophthalmol (Phila). 2017 Mar-Apr;6(2):215-223. doi: 10.22608/APO.201705. Review.	Asia Pac J Ophthalmol (Phila)		2017			0.0273687		doi: 10.22608/APO.201705	28399346					0			0				0	0		doi: 10.22608/APO.201705	Shields JA, Shields CL., Tumors and Related Lesions of the Pigmented Epithelium. Asia Pac J Ophthalmol (Phila). 2017
10426	Systemic associations of corneal deposits: a review and photographic guide.	Patel DV.	Clin Exp Ophthalmol. 2017 Jan;45(1):14-23. doi: 10.1111/ceo.12790. Epub 2016 Jul 20. Review.	Clin Exp Ophthalmol		2017			0.0275588		doi: 10.1111/ceo.12790	27311850					0			0				0	0		doi: 10.1111/ceo.12790	Patel DV., Systemic associations of corneal deposits: a review and photographic guide. Clin Exp Ophthalmol. 2017
2063	Codeine Plus Acetaminophen for Pain After Photorefractive Keratectomy: A Randomized, Double-Blind, Placebo-Controlled Add-On Trial.	Pereira VBP, Garcia R, Torricelli AAM, Mukai A, Bechara SJ.	Cornea. 2017 Oct;36(10):1206-1212. doi: 10.1097/ICO.0000000000001328.	Cornea		2017			0.0275922		doi: 10.1097/ICO.0000000000001328	28820793					0			0				0	0		doi: 10.1097/ICO.0000000000001328	Pereira VBP, Garcia R, Torricelli AAM, Mukai A, Bechara SJ., Codeine Plus Acetaminophen for Pain After Photorefractive Keratectomy: A Randomized, Double-Blind, Placebo-Controlled Add-On Trial. Cornea. 2017
8972	Sclerosing Orbital Inflammation Caused by Leishmania braziliensis.	Cruz AA, Alves-Ferreira EV, Milbratz-Moré G, Chahud F, Ruy PC, Duarte MI, Cruz AK.	Am J Trop Med Hyg. 2017 Jan 11;96(1):197-199. doi: 10.4269/ajtmh.16-0389. Epub 2016 Oct 31.	Am J Trop Med Hyg		2017			0.0276792		doi: 10.4269/ajtmh.16-0389	27799649					0			0				0	0		doi: 10.4269/ajtmh.16-0389	Cruz AA, Alves-Ferreira EV, Milbratz-Moré G, Chahud F, Ruy PC, Duarte MI, Cruz AK., Sclerosing Orbital Inflammation Caused by Leishmania braziliensis. Am J Trop Med Hyg. 2017
7514	Urea, Uric Acid, Prolactin and fT4 Concentrations in Aqueous Humor of Keratoconus Patients.	Stachon T, Stachon A, Hartmann U, Seitz B, Langenbucher A, Szentmáry N.	Curr Eye Res. 2017 Jun;42(6):842-846. doi: 10.1080/02713683.2016.1256413. Epub 2017 Jan 13.	Curr Eye Res		2017			0.0276941		doi: 10.1080/02713683.2016.1256413	28085502					0			0				0	0		doi: 10.1080/02713683.2016.1256413	Stachon T, Stachon A, Hartmann U, Seitz B, Langenbucher A, Szentmáry N., Urea, Uric Acid, Prolactin and fT4 Concentrations in Aqueous Humor of Keratoconus Patients. Curr Eye Res. 2017
212	Incidence, microbiology, and outcomes of endophthalmitis after 111,876 pars plana vitrectomies at a single, tertiary eye care hospital.	Bhende M, Raman R, Jain M, Shah PK, Sharma T, Gopal L, Bhende PS, Srinivasan S, Jambulingam M; Sankara Nethralaya Vitreoretinal Study Group (SNVR-Study Group)..	PLoS One. 2018 Jan 16;13(1):e0191173. doi: 10.1371/journal.pone.0191173. eCollection 2018.	PLoS One		2018			0.0277197		doi: 10.1371/journal.pone.0191173	29338030					0			0				0	0		doi: 10.1371/journal.pone.0191173	Bhende M, Raman R, Jain M, Shah PK, Sharma T, Gopal L, Bhende PS, Srinivasan S, Jambulingam M; Sankara Nethralaya Vitreoretinal Study Group (SNVR-Study Group).., Incidence, microbiology, and outcomes of endophthalmitis after 111,876 pars plana vitrectomies at a single, tertiary eye care hospital. PLoS One. 2018
7850	An abnormal periventricular magnetization transfer ratio gradient occurs early in multiple sclerosis.	Brown JW, Pardini M, Brownlee WJ, Fernando K, Samson RS, Prados Carrasco F, Ourselin S, Gandini Wheeler-Kingshott CA, Miller DH, Chard DT.	Brain. 2017 Feb;140(2):387-398. doi: 10.1093/brain/aww296. Epub 2017 Jan 2.	Brain		2017			0.027776		doi: 10.1093/brain/aww296	28043954					0			0				0	0		doi: 10.1093/brain/aww296	Brown JW, Pardini M, Brownlee WJ, Fernando K, Samson RS, Prados Carrasco F, Ourselin S, Gandini Wheeler-Kingshott CA, Miller DH, Chard DT., An abnormal periventricular magnetization transfer ratio gradient occurs early in multiple sclerosis. Brain. 2017
8376	Macroprolactinomas and Nonfunctioning Pituitary Adenomas and Pregnancy Outcomes.	Lambert K, Rees K, Seed PT, Dhanjal MK, Knight M, McCance DR, Williamson C.	Obstet Gynecol. 2017 Jan;129(1):185-194. doi: 10.1097/AOG.0000000000001747.	Obstet Gynecol		2017			0.0277821		doi: 10.1097/AOG.0000000000001747	27926659					0			0				0	0		doi: 10.1097/AOG.0000000000001747	Lambert K, Rees K, Seed PT, Dhanjal MK, Knight M, McCance DR, Williamson C., Macroprolactinomas and Nonfunctioning Pituitary Adenomas and Pregnancy Outcomes. Obstet Gynecol. 2017
4039	Urinary Isoprostane Levels and Age-Related Macular Degeneration.	Sabanayagam C, Lye WK, Januszewski A, Banu Binte Mohammed Abdul R, Cheung GCM, Kumari N, Wong TY, Cheng CY, Lamoureux E.	Invest Ophthalmol Vis Sci. 2017 May 1;58(5):2538-2543. doi: 10.1167/iovs.16-21263.	Invest Ophthalmol Vis Sci		2017			0.0278049		doi: 10.1167/iovs.16-21263	28492872					0			0				0	0		doi: 10.1167/iovs.16-21263	Sabanayagam C, Lye WK, Januszewski A, Banu Binte Mohammed Abdul R, Cheung GCM, Kumari N, Wong TY, Cheng CY, Lamoureux E., Urinary Isoprostane Levels and Age-Related Macular Degeneration. Invest Ophthalmol Vis Sci. 2017
10607	High Efficacy of Methotrexate in Patients with Recurrent Idiopathic Acute Anterior Uveitis: a Prospective Study.	Bachta A, Kisiel B, Tłustochowicz M, Raczkiewicz A, Rękas M, Tłustochowicz W.	Arch Immunol Ther Exp (Warsz). 2017 Feb;65(1):93-97. doi: 10.1007/s00005-016-0402-1. Epub 2016 May 11.	Arch Immunol Ther Exp (Warsz)		2017			0.027806		doi: 10.1007/s00005-016-0402-1	27170318					0			0				0	0		doi: 10.1007/s00005-016-0402-1	Bachta A, Kisiel B, Tłustochowicz M, Raczkiewicz A, Rękas M, Tłustochowicz W., High Efficacy of Methotrexate in Patients with Recurrent Idiopathic Acute Anterior Uveitis: a Prospective Study. Arch Immunol Ther Exp (Warsz). 2017
3421	The Association of Chemokine Gene Polymorphisms with VKH and Behcet's Disease in a Chinese Han Population.	Huang Y, Yu H, Cao Q, Deng J, Huang X, Kijlstra A, Yang P.	Biomed Res Int. 2017;2017:1274960. doi: 10.1155/2017/1274960. Epub 2017 May 14.	Biomed Res Int		2017			0.0279718		doi: 10.1155/2017/1274960	28589131					0			0				0	0		doi: 10.1155/2017/1274960	Huang Y, Yu H, Cao Q, Deng J, Huang X, Kijlstra A, Yang P., The Association of Chemokine Gene Polymorphisms with VKH and Behcet's Disease in a Chinese Han Population. Biomed Res Int. 2017
6065	Role of Autophagy in Angiogenesis Induced by a High-Glucose Condition in RF/6A Cells.	Du JH, Li X, Li R, Cheng BX, Kuerbanjiang M, Ma L.	Ophthalmologica. 2017;237(2):85-95. doi: 10.1159/000455270. Epub 2017 Mar 3.	Ophthalmologica		2017			0.0284018		doi: 10.1159/000455270	28253511					0			0				0	0		doi: 10.1159/000455270	Du JH, Li X, Li R, Cheng BX, Kuerbanjiang M, Ma L., Role of Autophagy in Angiogenesis Induced by a High-Glucose Condition in RF/6A Cells. Ophthalmologica. 2017
4458	Achievements and Limits of Current Medical Therapy of Glaucoma.	Kalouda P, Keskini C, Anastasopoulos E, Topouzis F.	Dev Ophthalmol. 2017;59:1-14. doi: 10.1159/000458482. Epub 2017 Apr 25. Review.	Dev Ophthalmol		2017			0.0285227		doi: 10.1159/000458482	28442683					0			0				0	0		doi: 10.1159/000458482	Kalouda P, Keskini C, Anastasopoulos E, Topouzis F., Achievements and Limits of Current Medical Therapy of Glaucoma. Dev Ophthalmol. 2017
3419	All-trans retinoic acid upregulates the expression of ciliary neurotrophic factor in retinal pigment epithelial cells.	Zhou WD, Wang LL, Zhou LB, Bin W, Bao TP, Zhang Y, Shu J, Yang WX, Hui LL, Jin R, Zhuang LL, Zhou GP.	Cell Biochem Funct. 2017 Jun;35(4):202-208. doi: 10.1002/cbf.3264.	Cell Biochem Funct		2017			0.0285376		doi: 10.1002/cbf.3264	28589680					0			0				0	0		doi: 10.1002/cbf.3264	Zhou WD, Wang LL, Zhou LB, Bin W, Bao TP, Zhang Y, Shu J, Yang WX, Hui LL, Jin R, Zhuang LL, Zhou GP., All-trans retinoic acid upregulates the expression of ciliary neurotrophic factor in retinal pigment epithelial cells. Cell Biochem Funct. 2017
10441	Aqueous outflow regulation: Optical coherence tomography implicates pressure-dependent tissue motion.	Xin C, Wang RK, Song S, Shen T, Wen J, Martin E, Jiang Y, Padilla S, Johnstone M.	Exp Eye Res. 2017 May;158:171-186. doi: 10.1016/j.exer.2016.06.007. Epub 2016 Jun 11. Review.	Exp Eye Res		2017			0.0286952		doi: 10.1016/j.exer.2016.06.007	27302601					0			0				0	0		doi: 10.1016/j.exer.2016.06.007	Xin C, Wang RK, Song S, Shen T, Wen J, Martin E, Jiang Y, Padilla S, Johnstone M., Aqueous outflow regulation: Optical coherence tomography implicates pressure-dependent tissue motion. Exp Eye Res. 2017
217	Pharmacoepidemiological assessment of adherence and influencing co-factors among primary open-angle glaucoma patients-An observational cohort study.	Frech S, Kreft D, Guthoff RF, Doblhammer G.	PLoS One. 2018 Jan 12;13(1):e0191185. doi: 10.1371/journal.pone.0191185. eCollection 2018. Erratum in: PLoS One. 2018 Feb 23;13(2):e0193621.	PLoS One		2018			0.0288041		doi: 10.1371/journal.pone.0191185	29329338					0			0				0	0		doi: 10.1371/journal.pone.0191185	Frech S, Kreft D, Guthoff RF, Doblhammer G., Pharmacoepidemiological assessment of adherence and influencing co-factors among primary open-angle glaucoma patients-An observational cohort study. PLoS One. 2018
8868	A Pilot Study to Evaluate the Oral Microbiome and Dental Health in Primary Open-Angle Glaucoma.	Polla D, Astafurov K, Hawy E, Hyman L, Hou W, Danias J.	J Glaucoma. 2017 Apr;26(4):320-327. doi: 10.1097/IJG.0000000000000465.	J Glaucoma		2017			0.0289653		doi: 10.1097/IJG.0000000000000465	27820425					0			0				0	0		doi: 10.1097/IJG.0000000000000465	Polla D, Astafurov K, Hawy E, Hyman L, Hou W, Danias J., A Pilot Study to Evaluate the Oral Microbiome and Dental Health in Primary Open-Angle Glaucoma. J Glaucoma. 2017
2896	In vitro and in vivo inhibition of proangiogenic retinal phenotype by an antisense oligonucleotide downregulating uPAR expression.	Lulli M, Cammalleri M, Granucci I, Witort E, Bono S, Di Gesualdo F, Lupia A, Loffredo R, Casini G, Dal Monte M, Capaccioli S.	Biochem Biophys Res Commun. 2017 Aug 26;490(3):977-983. doi: 10.1016/j.bbrc.2017.06.150. Epub 2017 Jun 27.	Biochem Biophys Res Commun		2017			0.0290025		doi: 10.1016/j.bbrc.2017.06.150	28666875					0			0				0	0		doi: 10.1016/j.bbrc.2017.06.150	Lulli M, Cammalleri M, Granucci I, Witort E, Bono S, Di Gesualdo F, Lupia A, Loffredo R, Casini G, Dal Monte M, Capaccioli S., In vitro and in vivo inhibition of proangiogenic retinal phenotype by an antisense oligonucleotide downregulating uPAR expression. Biochem Biophys Res Commun. 2017
4628	Adjunctive Oral Voriconazole Treatment of Fusarium Keratitis: A Secondary Analysis From the Mycotic Ulcer Treatment Trial II.	Prajna NV, Krishnan T, Rajaraman R, Patel S, Shah R, Srinivasan M, Devi L, Das M, Ray KJ, O'Brien KS, Oldenburg CE, McLeod SD, Zegans ME, Acharya NR, Lietman TM, Rose-Nussbaumer J; Mycotic Ulcer Treatment Trial Group..	JAMA Ophthalmol. 2017 Jun 1;135(6):520-525. doi: 10.1001/jamaophthalmol.2017.0616.	JAMA Ophthalmol		2017			0.029186		doi: 10.1001/jamaophthalmol.2017.0616	28426856					0			0				0	0		doi: 10.1001/jamaophthalmol.2017.0616	Prajna NV, Krishnan T, Rajaraman R, Patel S, Shah R, Srinivasan M, Devi L, Das M, Ray KJ, O'Brien KS, Oldenburg CE, McLeod SD, Zegans ME, Acharya NR, Lietman TM, Rose-Nussbaumer J; Mycotic Ulcer Treatment Trial Group.., Adjunctive Oral Voriconazole Treatment of Fusarium Keratitis: A Secondary Analysis From the Mycotic Ulcer Treatment Trial II. JAMA Ophthalmol. 2017
4403	The relationship between vascular endothelial dysfunction and treatment frequency in neovascular age-related macular degeneration.	Ueda-Consolvo T, Hayashi A, Ozaki M, Nakamura T, Yagou T, Abe S.	Jpn J Ophthalmol. 2017 Jul;61(4):347-353. doi: 10.1007/s10384-017-0515-z. Epub 2017 Apr 26.	Jpn J Ophthalmol		2017			0.0292569		doi: 10.1007/s10384-017-0515-z	28447271					0			0				0	0		doi: 10.1007/s10384-017-0515-z	Ueda-Consolvo T, Hayashi A, Ozaki M, Nakamura T, Yagou T, Abe S., The relationship between vascular endothelial dysfunction and treatment frequency in neovascular age-related macular degeneration. Jpn J Ophthalmol. 2017
3090	Management of neovascular glaucoma with intravitreal ranibizumab, panretinal photocoagulation, and subsequent 5-fluorouracil augmented trabeculectomy: A case report.	Zhao X, Wang Z, Yang X.	Medicine (Baltimore). 2017 Jun;96(25):e7221. doi: 10.1097/MD.0000000000007221.	Medicine (Baltimore)		2017			0.0292581		doi: 10.1097/MD.0000000000007221	28640115					0			0				0	0		doi: 10.1097/MD.0000000000007221	Zhao X, Wang Z, Yang X., Management of neovascular glaucoma with intravitreal ranibizumab, panretinal photocoagulation, and subsequent 5-fluorouracil augmented trabeculectomy: A case report. Medicine (Baltimore). 2017
1816	Prenatal Risk Factors for PHACE Syndrome: A Study Using the PHACE Syndrome International Clinical Registry and Genetic Repository.	Wan J, Steiner J, Baselga E, Blei F, Cordisco M, Garzon MC, Goddard DS, Haggstrom A, Krol A, Frieden IJ, Metry D, Morel KD, Verhagen JMA, Wargon O, Drolet BA, Siegel DH.	J Pediatr. 2017 Nov;190:275-279. doi: 10.1016/j.jpeds.2017.06.055. Epub 2017 Sep 1.	J Pediatr		2017			0.029575		doi: 10.1016/j.jpeds.2017.06.055	28867065					0			0				0	0		doi: 10.1016/j.jpeds.2017.06.055	Wan J, Steiner J, Baselga E, Blei F, Cordisco M, Garzon MC, Goddard DS, Haggstrom A, Krol A, Frieden IJ, Metry D, Morel KD, Verhagen JMA, Wargon O, Drolet BA, Siegel DH., Prenatal Risk Factors for PHACE Syndrome: A Study Using the PHACE Syndrome International Clinical Registry and Genetic Repository. J Pediatr. 2017
1173	Spontaneous Retinal Venous Pulsation in Unilateral Primary Open-angle Glaucoma With Low Intraocular Pressure.	Lee E, Kim TW, Kim JA, Kim JA, Kim H.	J Glaucoma. 2017 Oct;26(10):896-901. doi: 10.1097/IJG.0000000000000759.	J Glaucoma		2017			0.0296695		doi: 10.1097/IJG.0000000000000759	28991834					0			0				0	0		doi: 10.1097/IJG.0000000000000759	Lee E, Kim TW, Kim JA, Kim JA, Kim H., Spontaneous Retinal Venous Pulsation in Unilateral Primary Open-angle Glaucoma With Low Intraocular Pressure. J Glaucoma. 2017
10430	Retrospective Evaluation of a Teleretinal Screening Program in Detecting Multiple Nondiabetic Eye Diseases.	Maa AY, Patel S, Chasan JE, Delaune W, Lynch MG.	Telemed J E Health. 2017 Jan;23(1):41-48. doi: 10.1089/tmj.2016.0039. Epub 2016 Jun 16.	Telemed J E Health		2017			0.0296766		doi: 10.1089/tmj.2016.0039	27310867					0			0				0	0		doi: 10.1089/tmj.2016.0039	Maa AY, Patel S, Chasan JE, Delaune W, Lynch MG., Retrospective Evaluation of a Teleretinal Screening Program in Detecting Multiple Nondiabetic Eye Diseases. Telemed J E Health. 2017
8662	Spontaneous rupture of chorioretinal coloboma in an 8-year-old child is treated by temporal fascia graft.	Chan H, Delyfer MN, Pechmeja J, Andrèbe C, Mercier AE, Dutheil C, Korobelnik JF, Paya C.	J AAPOS. 2017 Feb;21(1):73-75. doi: 10.1016/j.jaapos.2016.08.015. Epub 2016 Nov 16.	J AAPOS		2017			0.0297025		doi: 10.1016/j.jaapos.2016.08.015	27866070					0			0				0	0		doi: 10.1016/j.jaapos.2016.08.015	Chan H, Delyfer MN, Pechmeja J, Andrèbe C, Mercier AE, Dutheil C, Korobelnik JF, Paya C., Spontaneous rupture of chorioretinal coloboma in an 8-year-old child is treated by temporal fascia graft. J AAPOS. 2017
10898	Glycemic control and complications in patients with type 1 diabetes - a registry-based longitudinal study of adolescents and young adults.	Carlsen S, Skrivarhaug T, Thue G, Cooper JG, Gøransson L, Løvaas K, Sandberg S.	Pediatr Diabetes. 2017 May;18(3):188-195. doi: 10.1111/pedi.12372. Epub 2016 Feb 15.	Pediatr Diabetes		2017			0.0297865		doi: 10.1111/pedi.12372	26875589					0			0				0	0		doi: 10.1111/pedi.12372	Carlsen S, Skrivarhaug T, Thue G, Cooper JG, Gøransson L, Løvaas K, Sandberg S., Glycemic control and complications in patients with type 1 diabetes - a registry-based longitudinal study of adolescents and young adults. Pediatr Diabetes. 2017
5761	Choroidal infarction in a glaucoma patient with Flammer syndrome: a case report with a long term follow-up.	Terelak-Borys B, Grabska-Liberek I, Piekarniak-Wozniak A, Konieczka K.	BMC Ophthalmol. 2017 Mar 14;17(1):23. doi: 10.1186/s12886-017-0416-4.	BMC Ophthalmol		2017			0.0298659		doi: 10.1186/s12886-017-0416-4	28288589					0			0				0	0		doi: 10.1186/s12886-017-0416-4	Terelak-Borys B, Grabska-Liberek I, Piekarniak-Wozniak A, Konieczka K., Choroidal infarction in a glaucoma patient with Flammer syndrome: a case report with a long term follow-up. BMC Ophthalmol. 2017
2093	Ocular toxicity due to Trametinib and Dabrafenib.	Sarny S, Neumayer M, Kofler J, El-Shabrawi Y.	BMC Ophthalmol. 2017 Aug 17;17(1):146. doi: 10.1186/s12886-017-0541-0.	BMC Ophthalmol		2017			0.0298713		doi: 10.1186/s12886-017-0541-0	28818062					0			0				0	0		doi: 10.1186/s12886-017-0541-0	Sarny S, Neumayer M, Kofler J, El-Shabrawi Y., Ocular toxicity due to Trametinib and Dabrafenib. BMC Ophthalmol. 2017
8496	Isoflurane-Associated Mydriasis Mimicking Blown Pupils in a Patient Treated in a Neurointensive Care Unit.	Korf EM, Tronnier VM, Gliemroth J, Küchler JN.	J Neurol Surg A Cent Eur Neurosurg. 2017 Jul;78(4):403-406. doi: 10.1055/s-0036-1594237. Epub 2016 Nov 30.	J Neurol Surg A Cent Eur Neurosurg		2017			0.0302316		doi: 10.1055/s-0036-1594237	27903013					0			0				0	0		doi: 10.1055/s-0036-1594237	Korf EM, Tronnier VM, Gliemroth J, Küchler JN., Isoflurane-Associated Mydriasis Mimicking Blown Pupils in a Patient Treated in a Neurointensive Care Unit. J Neurol Surg A Cent Eur Neurosurg. 2017
1025	Congenital sixth nerve palsy with associated anomalies.	Kasturi N.	Indian J Ophthalmol. 2017 Oct;65(10):1056-1057. doi: 10.4103/ijo.IJO_335_17.	Indian J Ophthalmol		2017			0.0302728		doi: 10.4103/ijo.IJO_335_17	29044089					0			0				0	0		doi: 10.4103/ijo.IJO_335_17	Kasturi N., Congenital sixth nerve palsy with associated anomalies. Indian J Ophthalmol. 2017
6973	Medical history of discordant twins and environmental etiologies of autism.	Willfors C, Carlsson T, Anderlid BM, Nordgren A, Kostrzewa E, Berggren S, Ronald A, Kuja-Halkola R, Tammimies K, Bölte S.	Transl Psychiatry. 2017 Jan 31;7(1):e1014. doi: 10.1038/tp.2016.269.	Transl Psychiatry		2017			0.0303243		doi: 10.1038/tp.2016.269	28140403					0			0				0	0		doi: 10.1038/tp.2016.269	Willfors C, Carlsson T, Anderlid BM, Nordgren A, Kostrzewa E, Berggren S, Ronald A, Kuja-Halkola R, Tammimies K, Bölte S., Medical history of discordant twins and environmental etiologies of autism. Transl Psychiatry. 2017
9265	Positive vitreous pressure: Pathophysiology, complications, prevention, and management.	Chronopoulos A, Thumann G, Schutz J.	Surv Ophthalmol. 2017 Mar - Apr;62(2):127-133. doi: 10.1016/j.survophthal.2016.10.002. Epub 2016 Oct 15. Review.	Surv Ophthalmol		2017			0.0305342		doi: 10.1016/j.survophthal.2016.10.002	27751822					0			0				0	0		doi: 10.1016/j.survophthal.2016.10.002	Chronopoulos A, Thumann G, Schutz J., Positive vitreous pressure: Pathophysiology, complications, prevention, and management. Surv Ophthalmol. 2017
243	Epithelial changes with corneal punctate epitheliopathy in type 2 diabetes mellitus and their correlation with time to healing.	Qu JH, Li L, Tian L, Zhang XY, Thomas R, Sun XG.	BMC Ophthalmol. 2018 Jan 4;18(1):1. doi: 10.1186/s12886-017-0645-6.	BMC Ophthalmol		2018			0.0305517		doi: 10.1186/s12886-017-0645-6	29301512					0			0				0	0		doi: 10.1186/s12886-017-0645-6	Qu JH, Li L, Tian L, Zhang XY, Thomas R, Sun XG., Epithelial changes with corneal punctate epitheliopathy in type 2 diabetes mellitus and their correlation with time to healing. BMC Ophthalmol. 2018
9725	Medial and mediolateral orbital decompression in intractable Graves' Orbitopathy.	Seibel I, Hofmann VM, Sönmez H, Schönfeld S, Jumah MD, Lenarz M, Coordes A.	Auris Nasus Larynx. 2017 Aug;44(4):428-434. doi: 10.1016/j.anl.2016.08.007. Epub 2016 Sep 5.	Auris Nasus Larynx		2017			0.0308093		doi: 10.1016/j.anl.2016.08.007	27609530					0			0				0	0		doi: 10.1016/j.anl.2016.08.007	Seibel I, Hofmann VM, Sönmez H, Schönfeld S, Jumah MD, Lenarz M, Coordes A., Medial and mediolateral orbital decompression in intractable Graves' Orbitopathy. Auris Nasus Larynx. 2017
6289	Identification of differentially expressed proteins in retinoblastoma tumors using mass spectrometry-based comparative proteomic approach.	Naru J, Aggarwal R, Mohanty AK, Singh U, Bansal D, Kakkar N, Agnihotri N.	J Proteomics. 2017 Apr 21;159:77-91. doi: 10.1016/j.jprot.2017.02.006. Epub 2017 Feb 13.	J Proteomics		2017			0.0308246		doi: 10.1016/j.jprot.2017.02.006	28232133					0			0				0	0		doi: 10.1016/j.jprot.2017.02.006	Naru J, Aggarwal R, Mohanty AK, Singh U, Bansal D, Kakkar N, Agnihotri N., Identification of differentially expressed proteins in retinoblastoma tumors using mass spectrometry-based comparative proteomic approach. J Proteomics. 2017
5763	Prodromal symptoms, health care seeking in response to symptoms and associated factors in eclamptic patients.	Gudu W.	BMC Pregnancy Childbirth. 2017 Mar 14;17(1):87. doi: 10.1186/s12884-017-1272-1.	BMC Pregnancy Childbirth		2017			0.0309029		doi: 10.1186/s12884-017-1272-1	28288576					0			0				0	0		doi: 10.1186/s12884-017-1272-1	Gudu W., Prodromal symptoms, health care seeking in response to symptoms and associated factors in eclamptic patients. BMC Pregnancy Childbirth. 2017
7745	Pilot Study of Corneal Sensitivity and Its Association in Keratoconus.	Mandathara PS, Stapleton FJ, Kokkinakis J, Willcox MD.	Cornea. 2017 Feb;36(2):163-168. doi: 10.1097/ICO.0000000000001077.	Cornea		2017			0.0309724		doi: 10.1097/ICO.0000000000001077	28060062					0			0				0	0		doi: 10.1097/ICO.0000000000001077	Mandathara PS, Stapleton FJ, Kokkinakis J, Willcox MD., Pilot Study of Corneal Sensitivity and Its Association in Keratoconus. Cornea. 2017
10412	CHOROIDAL THICKNESS IN UNILATERAL IDIOPATHIC MACULAR HOLE: A Cross-Sectional Study and Meta-Analysis.	Zhang P, Zhou M, Wu Y, Lu B, Li T, Zhao J, Wang F, Sun X.	Retina. 2017 Jan;37(1):60-69. doi: 10.1097/IAE.0000000000001118.	Retina		2017			0.0310003		doi: 10.1097/IAE.0000000000001118	27322947					0			0				0	0		doi: 10.1097/IAE.0000000000001118	Zhang P, Zhou M, Wu Y, Lu B, Li T, Zhao J, Wang F, Sun X., CHOROIDAL THICKNESS IN UNILATERAL IDIOPATHIC MACULAR HOLE: A Cross-Sectional Study and Meta-Analysis. Retina. 2017
2591	Quantitative physiological measurements to evaluate the response of antivascular endothelial growth factor treatment in patients with neovascular diseases.	Hong IH, Park SP.	Indian J Ophthalmol. 2017 Jul;65(7):559-568. doi: 10.4103/ijo.IJO_278_17. Review.	Indian J Ophthalmol		2017			0.0310148		doi: 10.4103/ijo.IJO_278_17	28724811					0			0				0	0		doi: 10.4103/ijo.IJO_278_17	Hong IH, Park SP., Quantitative physiological measurements to evaluate the response of antivascular endothelial growth factor treatment in patients with neovascular diseases. Indian J Ophthalmol. 2017
7408	Diffuse Unilateral Subacute Neuroretinitis Caused by Ancylostoma Hookworm.	Poppert S, Heideking M, Agostini H, Fritzenwanker M, Wüppenhorst N, Muntau B, Henneke P, Kern W, Krücken J, Junker B, Hufnagel M.	Emerg Infect Dis. 2017 Feb;23(2):343-344. doi: 10.3201/eid2302.142064.	Emerg Infect Dis		2017			0.0310186		doi: 10.3201/eid2302.142064	28098549					0			0				0	0		doi: 10.3201/eid2302.142064	Poppert S, Heideking M, Agostini H, Fritzenwanker M, Wüppenhorst N, Muntau B, Henneke P, Kern W, Krücken J, Junker B, Hufnagel M., Diffuse Unilateral Subacute Neuroretinitis Caused by Ancylostoma Hookworm. Emerg Infect Dis. 2017
175	Vitrectomy without prone positioning for rhegmatogenous retinal detachments in eyes with inferior retinal breaks.	Shiraki N, Sakimoto S, Sakaguchi H, Nishida K, Nishida K, Kamei M.	PLoS One. 2018 Jan 26;13(1):e0191531. doi: 10.1371/journal.pone.0191531. eCollection 2018.	PLoS One		2018			0.0311255		doi: 10.1371/journal.pone.0191531	29373582					0			0				0	0		doi: 10.1371/journal.pone.0191531	Shiraki N, Sakimoto S, Sakaguchi H, Nishida K, Nishida K, Kamei M., Vitrectomy without prone positioning for rhegmatogenous retinal detachments in eyes with inferior retinal breaks. PLoS One. 2018
9517	Pseudolentogenic astigmatic effect of multifocal intraocular lenses: non-corneal ocular residual astigmatism (N-CORA) as a new parameter in astigmatic change analysis.	Frings A, Steinberg J, Druchkiv V, Linke SJ, Katz T.	Int Ophthalmol. 2017 Aug;37(4):957-964. doi: 10.1007/s10792-016-0359-4. Epub 2016 Sep 24.	Int Ophthalmol		2017			0.0317593		doi: 10.1007/s10792-016-0359-4	27665612					0			0				0	0		doi: 10.1007/s10792-016-0359-4	Frings A, Steinberg J, Druchkiv V, Linke SJ, Katz T., Pseudolentogenic astigmatic effect of multifocal intraocular lenses: non-corneal ocular residual astigmatism (N-CORA) as a new parameter in astigmatic change analysis. Int Ophthalmol. 2017
6119	Long non-coding RNA MIAT acts as a biomarker in diabetic retinopathy by absorbing miR-29b and regulating cell apoptosis.	Zhang J, Chen M, Chen J, Lin S, Cai D, Chen C, Chen Z.	Biosci Rep. 2017 Apr 28;37(2). pii: BSR20170036. doi: 10.1042/BSR20170036. Print 2017 Apr 30.	Biosci Rep		2017			0.0317917		doi: 10.1042/BSR20170036	28246353					0			0				0	0		doi: 10.1042/BSR20170036	Zhang J, Chen M, Chen J, Lin S, Cai D, Chen C, Chen Z., Long non-coding RNA MIAT acts as a biomarker in diabetic retinopathy by absorbing miR-29b and regulating cell apoptosis. Biosci Rep. 2017
3475	Distribution of Nonperfusion Area on Ultra-widefield Fluorescein Angiography in Eyes With Diabetic Macular Edema: DAVE Study.	Fan W, Wang K, Ghasemi Falavarjani K, Sagong M, Uji A, Ip M, Wykoff CC, Brown DM, van Hemert J, Sadda SR.	Am J Ophthalmol. 2017 Aug;180:110-116. doi: 10.1016/j.ajo.2017.05.024. Epub 2017 Jun 1.	Am J Ophthalmol		2017			0.031825		doi: 10.1016/j.ajo.2017.05.024	28579062					0			0				0	0		doi: 10.1016/j.ajo.2017.05.024	Fan W, Wang K, Ghasemi Falavarjani K, Sagong M, Uji A, Ip M, Wykoff CC, Brown DM, van Hemert J, Sadda SR., Distribution of Nonperfusion Area on Ultra-widefield Fluorescein Angiography in Eyes With Diabetic Macular Edema: DAVE Study. Am J Ophthalmol. 2017
5461	The Effects of Phacoemulsification on Intraocular Pressure and Topical Medication Use in Patients With Glaucoma: A Systematic Review and Meta-analysis of 3-Year Data.	Armstrong JJ, Wasiuta T, Kiatos E, Malvankar-Mehta M, Hutnik CML.	J Glaucoma. 2017 Jun;26(6):511-522. doi: 10.1097/IJG.0000000000000643. Review.	J Glaucoma		2017			0.0319148		doi: 10.1097/IJG.0000000000000643	28333892					0			0				0	0		doi: 10.1097/IJG.0000000000000643	Armstrong JJ, Wasiuta T, Kiatos E, Malvankar-Mehta M, Hutnik CML., The Effects of Phacoemulsification on Intraocular Pressure and Topical Medication Use in Patients With Glaucoma: A Systematic Review and Meta-analysis of 3-Year Data. J Glaucoma. 2017
7142	GUCA1A mutation causes maculopathy in a five-generation family with a wide spectrum of severity.	Chen X, Sheng X, Zhuang W, Sun X, Liu G, Shi X, Huang G, Mei Y, Li Y, Pan X, Liu Y, Li Z, Zhao Q, Yan B, Zhao C.	Genet Med. 2017 Aug;19(8):945-954. doi: 10.1038/gim.2016.217. Epub 2017 Jan 26.	Genet Med		2017			0.0319821		doi: 10.1038/gim.2016.217	28125083					0			0				0	0		doi: 10.1038/gim.2016.217	Chen X, Sheng X, Zhuang W, Sun X, Liu G, Shi X, Huang G, Mei Y, Li Y, Pan X, Liu Y, Li Z, Zhao Q, Yan B, Zhao C., GUCA1A mutation causes maculopathy in a five-generation family with a wide spectrum of severity. Genet Med. 2017
8920	Wingtip Flap for Reconstruction of Full-Thickness Upper and Lower Eyelid Defects.	Vrcek I, Chou E, Blaydon S, Shore J.	Ophthal Plast Reconstr Surg. 2017 Mar/Apr;33(2):144-146. doi: 10.1097/IOP.0000000000000814.	Ophthal Plast Reconstr Surg		2017			0.0320836		doi: 10.1097/IOP.0000000000000814	27811633					0			0				0	0		doi: 10.1097/IOP.0000000000000814	Vrcek I, Chou E, Blaydon S, Shore J., Wingtip Flap for Reconstruction of Full-Thickness Upper and Lower Eyelid Defects. Ophthal Plast Reconstr Surg. 2017
594	Spaceflight-Induced Intracranial Hypertension and Visual Impairment: Pathophysiology and Countermeasures.	Zhang LF, Hargens AR.	Physiol Rev. 2018 Jan 1;98(1):59-87. doi: 10.1152/physrev.00017.2016. Review.	Physiol Rev		2018			0.0320961		doi: 10.1152/physrev.00017.2016	29167331					0			0				0	0		doi: 10.1152/physrev.00017.2016	Zhang LF, Hargens AR., Spaceflight-Induced Intracranial Hypertension and Visual Impairment: Pathophysiology and Countermeasures. Physiol Rev. 2018
2624	Retinal pigment epithelium adenoma in vitreous fluid cytology.	John S, Lew M.	Diagn Cytopathol. 2017 Dec;45(12):1128-1131. doi: 10.1002/dc.23781. Epub 2017 Jul 18.	Diagn Cytopathol		2017			0.0321167		doi: 10.1002/dc.23781	28719046					0			0				0	0		doi: 10.1002/dc.23781	John S, Lew M., Retinal pigment epithelium adenoma in vitreous fluid cytology. Diagn Cytopathol. 2017
2206	Silicone oil versus gas tamponade for giant retinal tear-associated fovea-sparing retinal detachment: a comparison of outcome.	Banerjee PJ, Chandra A, Petrou P, Charteris DG.	Eye (Lond). 2017 Sep;31(9):1302-1307. doi: 10.1038/eye.2017.167. Epub 2017 Aug 11.	Eye (Lond)		2017			0.0321321		doi: 10.1038/eye.2017.167	28799555					0			0				0	0		doi: 10.1038/eye.2017.167	Banerjee PJ, Chandra A, Petrou P, Charteris DG., Silicone oil versus gas tamponade for giant retinal tear-associated fovea-sparing retinal detachment: a comparison of outcome. Eye (Lond). 2017
4520	Prominin-1 Is a Novel Regulator of Autophagy in the Human Retinal Pigment Epithelium.	Bhattacharya S, Yin J, Winborn CS, Zhang Q, Yue J, Chaum E.	Invest Ophthalmol Vis Sci. 2017 Apr 1;58(4):2366-2387. doi: 10.1167/iovs.16-21162.	Invest Ophthalmol Vis Sci		2017			0.0321942		doi: 10.1167/iovs.16-21162	28437526					0			0				0	0		doi: 10.1167/iovs.16-21162	Bhattacharya S, Yin J, Winborn CS, Zhang Q, Yue J, Chaum E., Prominin-1 Is a Novel Regulator of Autophagy in the Human Retinal Pigment Epithelium. Invest Ophthalmol Vis Sci. 2017
5127	Raised intracranial pressure and retinal haemorrhages in childhood encephalopathies.	Minns RA, Jones PA, Tandon A, Fleck BW, Mulvihill AO, Minns FC.	Dev Med Child Neurol. 2017 Jun;59(6):597-604. doi: 10.1111/dmcn.13419. Epub 2017 Mar 29.	Dev Med Child Neurol		2017			0.0322401		doi: 10.1111/dmcn.13419	28369828					0			0				0	0		doi: 10.1111/dmcn.13419	Minns RA, Jones PA, Tandon A, Fleck BW, Mulvihill AO, Minns FC., Raised intracranial pressure and retinal haemorrhages in childhood encephalopathies. Dev Med Child Neurol. 2017
7299	Registry of ocular anomalies among patients with genetic disorders attending the clinical genetics department at the National Research Center in Egypt.	Eid OM, Abdel Hady S, El-Kotoury A, Said KA, Rafat K, El-Bassyouni HT.	Ophthalmic Genet. 2017 Sep-Oct;38(5):418-421. doi: 10.1080/13816810.2016.1247460. Epub 2017 Jan 20.	Ophthalmic Genet		2017			0.0322983		doi: 10.1080/13816810.2016.1247460	28107085					0			0				0	0		doi: 10.1080/13816810.2016.1247460	Eid OM, Abdel Hady S, El-Kotoury A, Said KA, Rafat K, El-Bassyouni HT., Registry of ocular anomalies among patients with genetic disorders attending the clinical genetics department at the National Research Center in Egypt. Ophthalmic Genet. 2017
6452	Visual impairment in older institutionalised Canadian seniors with dementia.	Chriqui E, Law C, Kergoat MJ, Leclerc BS, Kergoat H.	Ophthalmic Physiol Opt. 2017 Mar;37(2):225-233. doi: 10.1111/opo.12358.	Ophthalmic Physiol Opt		2017			0.0323358		doi: 10.1111/opo.12358	28211177					0			0				0	0		doi: 10.1111/opo.12358	Chriqui E, Law C, Kergoat MJ, Leclerc BS, Kergoat H., Visual impairment in older institutionalised Canadian seniors with dementia. Ophthalmic Physiol Opt. 2017
5642	In vivo confocal microscopy of pre-Descemet corneal dystrophy associated with X-linked ichthyosis: a case report.	Shi H, Qi XF, Liu TT, Hao Q, Li XH, Liang LL, Wang YM, Cui ZH.	BMC Ophthalmol. 2017 Mar 16;17(1):29. doi: 10.1186/s12886-017-0423-5.	BMC Ophthalmol		2017			0.0323729		doi: 10.1186/s12886-017-0423-5	28302098					0			0				0	0		doi: 10.1186/s12886-017-0423-5	Shi H, Qi XF, Liu TT, Hao Q, Li XH, Liang LL, Wang YM, Cui ZH., In vivo confocal microscopy of pre-Descemet corneal dystrophy associated with X-linked ichthyosis: a case report. BMC Ophthalmol. 2017
2064	Teleophthalmic Approach for Detection of Corneal Diseases: Accuracy and Reliability.	Woodward MA, Musch DC, Hood CT, Greene JB, Niziol LM, Jeganathan VSE, Lee PP.	Cornea. 2017 Oct;36(10):1159-1165. doi: 10.1097/ICO.0000000000001294.	Cornea		2017			0.032374		doi: 10.1097/ICO.0000000000001294	28820791					0			0				0	0		doi: 10.1097/ICO.0000000000001294	Woodward MA, Musch DC, Hood CT, Greene JB, Niziol LM, Jeganathan VSE, Lee PP., Teleophthalmic Approach for Detection of Corneal Diseases: Accuracy and Reliability. Cornea. 2017
8832	CLINICAL PRESENTATION AND DISEASE COURSE OF USHER SYNDROME BECAUSE OF MUTATIONS IN MYO7A OR USH2A.	Testa F, Melillo P, Bonnet C, Marcelli V, de Benedictis A, Colucci R, Gallo B, Kurtenbach A, Rossi S, Marciano E, Auricchio A, Petit C, Zrenner E, Simonelli F.	Retina. 2017 Aug;37(8):1581-1590. doi: 10.1097/IAE.0000000000001389.	Retina		2017			0.0325715		doi: 10.1097/IAE.0000000000001389	27828912					0			0				0	0		doi: 10.1097/IAE.0000000000001389	Testa F, Melillo P, Bonnet C, Marcelli V, de Benedictis A, Colucci R, Gallo B, Kurtenbach A, Rossi S, Marciano E, Auricchio A, Petit C, Zrenner E, Simonelli F., CLINICAL PRESENTATION AND DISEASE COURSE OF USHER SYNDROME BECAUSE OF MUTATIONS IN MYO7A OR USH2A. Retina. 2017
3232	Abnormal Spontaneous Brain Activity in Patients With Anisometropic Amblyopia Using Resting-State Functional Magnetic Resonance Imaging.	Tang A, Chen T, Zhang J, Gong Q, Liu L.	J Pediatr Ophthalmol Strabismus. 2017 Sep 1;54(5):303-310. doi: 10.3928/01913913-20170320-05. Epub 2017 Jun 15.	J Pediatr Ophthalmol Strabismus		2017			0.0325928		doi: 10.3928/01913913-20170320-05	28617520					0			0				0	0		doi: 10.3928/01913913-20170320-05	Tang A, Chen T, Zhang J, Gong Q, Liu L., Abnormal Spontaneous Brain Activity in Patients With Anisometropic Amblyopia Using Resting-State Functional Magnetic Resonance Imaging. J Pediatr Ophthalmol Strabismus. 2017
7569	Noncontact Evaluation of Corneal Grafts: Swept-Source Fourier Domain OCT Versus High-Resolution Scheimpflug Imaging.	Szalai E, Németh G, Hassan Z, Módis L Jr.	Cornea. 2017 Apr;36(4):434-439. doi: 10.1097/ICO.0000000000001133.	Cornea		2017			0.0326933		doi: 10.1097/ICO.0000000000001133	28079690					0			0				0	0		doi: 10.1097/ICO.0000000000001133	Szalai E, Németh G, Hassan Z, Módis L Jr., Noncontact Evaluation of Corneal Grafts: Swept-Source Fourier Domain OCT Versus High-Resolution Scheimpflug Imaging. Cornea. 2017
4225	Pocket laboratories.	Perkel JM.	Nature. 2017 May 3;545(7652):119-121. doi: 10.1038/545119a. No abstract available.	Nature		2017			0.0328306		doi: 10.1038/545119a	28470200					0			0				0	0		doi: 10.1038/545119a	Perkel JM., Pocket laboratories. Nature. 2017
7861	Role of Diagnostic Endoscopy in Posterior Segment Evaluation for Definitive Prognostication in Eyes With Corneal Opacification.	Reddy Pappuru RR, Tyagi M, Paulose RM, Dave VP, Das T, Chhablani J, Narayanan R, Saxena RK, Balakrishnan D, Basu S, Sangwan VS.	Am J Ophthalmol. 2017 Apr;176:9-14. doi: 10.1016/j.ajo.2016.12.018. Epub 2016 Dec 28.	Am J Ophthalmol		2017			0.0328642		doi: 10.1016/j.ajo.2016.12.018	28040528					0			0				0	0		doi: 10.1016/j.ajo.2016.12.018	Reddy Pappuru RR, Tyagi M, Paulose RM, Dave VP, Das T, Chhablani J, Narayanan R, Saxena RK, Balakrishnan D, Basu S, Sangwan VS., Role of Diagnostic Endoscopy in Posterior Segment Evaluation for Definitive Prognostication in Eyes With Corneal Opacification. Am J Ophthalmol. 2017
2418	Effect of Donor and Recipient Diabetes Status on Descemet Membrane Endothelial Keratoplasty Adherence and Survival.	Price MO, Lisek M, Feng MT, Price FW Jr.	Cornea. 2017 Oct;36(10):1184-1188. doi: 10.1097/ICO.0000000000001305.	Cornea		2017			0.0330142		doi: 10.1097/ICO.0000000000001305	28749899					0			0				0	0		doi: 10.1097/ICO.0000000000001305	Price MO, Lisek M, Feng MT, Price FW Jr., Effect of Donor and Recipient Diabetes Status on Descemet Membrane Endothelial Keratoplasty Adherence and Survival. Cornea. 2017
1912	Trans-synaptic degeneration in the optic pathway. A study in clinically isolated syndrome and early relapsing-remitting multiple sclerosis with or without optic neuritis.	Puthenparampil M, Federle L, Poggiali D, Miante S, Signori A, Pilotto E, Rinaldi F, Perini P, Sormani MP, Midena E, Gallo P.	PLoS One. 2017 Aug 29;12(8):e0183957. doi: 10.1371/journal.pone.0183957. eCollection 2017.	PLoS One		2017			0.0330788		doi: 10.1371/journal.pone.0183957	28850630					0			0				0	0		doi: 10.1371/journal.pone.0183957	Puthenparampil M, Federle L, Poggiali D, Miante S, Signori A, Pilotto E, Rinaldi F, Perini P, Sormani MP, Midena E, Gallo P., Trans-synaptic degeneration in the optic pathway. A study in clinically isolated syndrome and early relapsing-remitting multiple sclerosis with or without optic neuritis. PLoS One. 2017
4639	2016 International Orthoptic Congress Burian Lecture: Folklore or Evidence?	Horwood AM.	Strabismus. 2017 Sep;25(3):120-127. doi: 10.1080/09273972.2017.1305425. Epub 2017 Apr 20.	Strabismus		2017			0.0331238		doi: 10.1080/09273972.2017.1305425	28426269					0			0				0	0		doi: 10.1080/09273972.2017.1305425	Horwood AM., 2016 International Orthoptic Congress Burian Lecture: Folklore or Evidence? Strabismus. 2017
2176	Pediatric Pseudotumor Cerebri Syndrome.	Phillips PH, Sheldon CA.	J Neuroophthalmol. 2017 Sep;37 Suppl 1:S33-S40. doi: 10.1097/WNO.0000000000000548. Review.	J Neuroophthalmol		2017			0.0331293		doi: 10.1097/WNO.0000000000000548	28806347					0			0				0	0		doi: 10.1097/WNO.0000000000000548	Phillips PH, Sheldon CA., Pediatric Pseudotumor Cerebri Syndrome. J Neuroophthalmol. 2017
6145	Visual Acuity, Retinal Sensitivity, and Macular Thickness Changes in Diabetic Patients without Diabetic Retinopathy after Cataract Surgery.	Stunf Pukl S, Vidović Valentinčič N, Urbančič M, Irman Grčar I, Grčar R, Pfeifer V, Globočnik Petrovič M.	J Diabetes Res. 2017;2017:3459156. doi: 10.1155/2017/3459156. Epub 2017 Jan 24.	J Diabetes Res		2017			0.0331558		doi: 10.1155/2017/3459156	28243608					0			0				0	0		doi: 10.1155/2017/3459156	Stunf Pukl S, Vidović Valentinčič N, Urbančič M, Irman Grčar I, Grčar R, Pfeifer V, Globočnik Petrovič M., Visual Acuity, Retinal Sensitivity, and Macular Thickness Changes in Diabetic Patients without Diabetic Retinopathy after Cataract Surgery. J Diabetes Res. 2017
924	Ocular, Auricular, and Oral Manifestations of Inflammatory Bowel Disease.	Fine S, Nee J, Thakuria P, Duff B, Farraye FA, Shah SA.	Dig Dis Sci. 2017 Dec;62(12):3269-3279. doi: 10.1007/s10620-017-4781-x. Epub 2017 Oct 24. Review.	Dig Dis Sci		2017			0.0332235		doi: 10.1007/s10620-017-4781-x	29064013					0			0				0	0		doi: 10.1007/s10620-017-4781-x	Fine S, Nee J, Thakuria P, Duff B, Farraye FA, Shah SA., Ocular, Auricular, and Oral Manifestations of Inflammatory Bowel Disease. Dig Dis Sci. 2017
10829	Evaluating the presence of Toxoplasma gondii in peripheral blood of patients with diverse forms of uveitis.	Belfort RN, Isenberg J, Fernandes BF, Di Cesare S, Belfort R Jr, Burnier MN Jr.	Int Ophthalmol. 2017 Feb;37(1):19-23. doi: 10.1007/s10792-016-0221-8. Epub 2016 Mar 14.	Int Ophthalmol		2017			0.0332401		doi: 10.1007/s10792-016-0221-8	26975400					0			0				0	0		doi: 10.1007/s10792-016-0221-8	Belfort RN, Isenberg J, Fernandes BF, Di Cesare S, Belfort R Jr, Burnier MN Jr., Evaluating the presence of Toxoplasma gondii in peripheral blood of patients with diverse forms of uveitis. Int Ophthalmol. 2017
6597	A Critical Evaluation of Refractive Outcomes Following LASIK for Moderate to High Astigmatism Using Two Excimer Laser Platforms.	Patel S, Bohac M, Biscevic A, Koncarevic M, Anticic M, Gabric N.	J Refract Surg. 2017 Feb 1;33(2):104-109. doi: 10.3928/1081597X-20161102-01.	J Refract Surg		2017			0.0332536		doi: 10.3928/1081597X-20161102-01	28192589					0			0				0	0		doi: 10.3928/1081597X-20161102-01	Patel S, Bohac M, Biscevic A, Koncarevic M, Anticic M, Gabric N., A Critical Evaluation of Refractive Outcomes Following LASIK for Moderate to High Astigmatism Using Two Excimer Laser Platforms. J Refract Surg. 2017
6783	Accuracy of Optical Coherence Tomography Measurements of Rectus Muscle Insertions in Adult Patients Undergoing Strabismus Surgery.	Rossetto JD, Cavuoto KM, Allemann N, McKeown CA, Capó H.	Am J Ophthalmol. 2017 Apr;176:236-243. doi: 10.1016/j.ajo.2017.01.025. Epub 2017 Feb 3.	Am J Ophthalmol		2017			0.0333024		doi: 10.1016/j.ajo.2017.01.025	28163119					0			0				0	0		doi: 10.1016/j.ajo.2017.01.025	Rossetto JD, Cavuoto KM, Allemann N, McKeown CA, Capó H., Accuracy of Optical Coherence Tomography Measurements of Rectus Muscle Insertions in Adult Patients Undergoing Strabismus Surgery. Am J Ophthalmol. 2017
8380	SLC4A11 Three-Dimensional Homology Model Rationalizes Corneal Dystrophy-Causing Mutations.	Badior KE, Alka K, Casey JR.	Hum Mutat. 2017 Mar;38(3):279-288. doi: 10.1002/humu.23152. Epub 2016 Dec 27.	Hum Mutat		2017			0.0333655		doi: 10.1002/humu.23152	27925686					0			0				0	0		doi: 10.1002/humu.23152	Badior KE, Alka K, Casey JR., SLC4A11 Three-Dimensional Homology Model Rationalizes Corneal Dystrophy-Causing Mutations. Hum Mutat. 2017
9247	WHAT IS THE FUNDAMENTAL NATURE OF PATHOLOGIC MYOPIA?	Ohno-Matsui K.	Retina. 2017 Jun;37(6):1043-1048. doi: 10.1097/IAE.0000000000001348. Review.	Retina		2017			0.0335198		doi: 10.1097/IAE.0000000000001348	27755375					0			0				0	0		doi: 10.1097/IAE.0000000000001348	Ohno-Matsui K., WHAT IS THE FUNDAMENTAL NATURE OF PATHOLOGIC MYOPIA? Retina. 2017
4882	Bilateral Neovascular Age-Related Macular Degeneration: Comparisons between First and Second Eyes.	Chew JK, Zhu M, Broadhead GK, Luo K, Hong T, Chang AA.	Ophthalmologica. 2017;238(1-2):23-30. doi: 10.1159/000469652. Epub 2017 Apr 11.	Ophthalmologica		2017			0.0335898		doi: 10.1159/000469652	28395293					0			0				0	0		doi: 10.1159/000469652	Chew JK, Zhu M, Broadhead GK, Luo K, Hong T, Chang AA., Bilateral Neovascular Age-Related Macular Degeneration: Comparisons between First and Second Eyes. Ophthalmologica. 2017
10966	Choroidal Thickness in Eyes with Fuchs Uveitis Syndrome.	Kardes E, Sezgin Akçay BI, Unlu C, Ergin A.	Ocul Immunol Inflamm. 2017 Apr;25(2):259-266. doi: 10.3109/09273948.2015.1115877. Epub 2016 Jan 14.	Ocul Immunol Inflamm		2017			0.0337159		doi: 10.3109/09273948.2015.1115877	26765133					0			0				0	0		doi: 10.3109/09273948.2015.1115877	Kardes E, Sezgin Akçay BI, Unlu C, Ergin A., Choroidal Thickness in Eyes with Fuchs Uveitis Syndrome. Ocul Immunol Inflamm. 2017
6343	CHARACTERIZATION OF MACULAR CHOROIDAL THICKNESS IN ISCHEMIC AND NONISCHEMIC DIABETIC MACULOPATHY.	Sheth JU, Giridhar A, Rajesh B, Gopalakrishnan M.	Retina. 2017 Mar;37(3):522-528. doi: 10.1097/IAE.0000000000001172.	Retina		2017			0.0337852		doi: 10.1097/IAE.0000000000001172	28225723					0			0				0	0		doi: 10.1097/IAE.0000000000001172	Sheth JU, Giridhar A, Rajesh B, Gopalakrishnan M., CHARACTERIZATION OF MACULAR CHOROIDAL THICKNESS IN ISCHEMIC AND NONISCHEMIC DIABETIC MACULOPATHY. Retina. 2017
2329	Serum 25-hydroxyvitamin D might be an independent prognostic factor for Graves disease recurrence.	Ahn HY, Chung YJ, Cho BY.	Medicine (Baltimore). 2017 Aug;96(31):e7700. doi: 10.1097/MD.0000000000007700.	Medicine (Baltimore)		2017			0.0339109		doi: 10.1097/MD.0000000000007700	28767604					0			0				0	0		doi: 10.1097/MD.0000000000007700	Ahn HY, Chung YJ, Cho BY., Serum 25-hydroxyvitamin D might be an independent prognostic factor for Graves disease recurrence. Medicine (Baltimore). 2017
10274	Comparison of Three Visual Field Tests in Children: Frequency Doubling Test, 24-2 and 30-2 SITA Perimetry.	Han S, Baek SH, Kim US.	Semin Ophthalmol. 2017;32(5):647-650. doi: 10.3109/08820538.2016.1157611. Epub 2016 Jul 12.	Semin Ophthalmol		2017			0.0339801		doi: 10.3109/08820538.2016.1157611	27404791					0			0				0	0		doi: 10.3109/08820538.2016.1157611	Han S, Baek SH, Kim US., Comparison of Three Visual Field Tests in Children: Frequency Doubling Test, 24-2 and 30-2 SITA Perimetry. Semin Ophthalmol. 2017
519	Macular Atrophy Development and Subretinal Drusenoid Deposits in Anti-Vascular Endothelial Growth Factor Treated Age-Related Macular Degeneration.	Zarubina AV, Gal-Or O, Huisingh CE, Owsley C, Freund KB.	Invest Ophthalmol Vis Sci. 2017 Dec 1;58(14):6038-6045. doi: 10.1167/iovs.17-22378.	Invest Ophthalmol Vis Sci		2017			0.034187		doi: 10.1167/iovs.17-22378	29196768					0			0				0	0		doi: 10.1167/iovs.17-22378	Zarubina AV, Gal-Or O, Huisingh CE, Owsley C, Freund KB., Macular Atrophy Development and Subretinal Drusenoid Deposits in Anti-Vascular Endothelial Growth Factor Treated Age-Related Macular Degeneration. Invest Ophthalmol Vis Sci. 2017
5168	Randomized Controlled Trial Evaluating a Standardized Strategy for Uveitis Etiologic Diagnosis (ULISSE).	de Parisot A, Kodjikian L, Errera MH, Sedira N, Heron E, Pérard L, Cornut PL, Schneider C, Rivière S, Ollé P, Pugnet G, Cathébras P, Manoli P, Bodaghi B, Saadoun D, Baillif S, Tieulie N, Andre M, Chiambaretta F, Bonin N, Bielefeld P, Bron A, et al.	Am J Ophthalmol. 2017 Jun;178:176-185. doi: 10.1016/j.ajo.2017.03.029. Epub 2017 Mar 31.	Am J Ophthalmol		2017			0.0341943		doi: 10.1016/j.ajo.2017.03.029	28366648					0			0				0	0		doi: 10.1016/j.ajo.2017.03.029	de Parisot A, Kodjikian L, Errera MH, Sedira N, Heron E, Pérard L, Cornut PL, Schneider C, Rivière S, Ollé P, Pugnet G, Cathébras P, Manoli P, Bodaghi B, Saadoun D, Baillif S, Tieulie N, Andre M, Chiambaretta F, Bonin N, Bielefeld P, Bron A, et al., Randomized Controlled Trial Evaluating a Standardized Strategy for Uveitis Etiologic Diagnosis (ULISSE). Am J Ophthalmol. 2017
8864	RETINAL VASCULITIS ASSOCIATED WITH NEUROMYELITIS OPTICA.	Mikhail M, Khan A.	Retin Cases Brief Rep. 2017 Winter;11 Suppl 1:S211-S215. doi: 10.1097/ICB.0000000000000445.	Retin Cases Brief Rep		2017			0.0342465		doi: 10.1097/ICB.0000000000000445	27820753					0			0				0	0		doi: 10.1097/ICB.0000000000000445	Mikhail M, Khan A., RETINAL VASCULITIS ASSOCIATED WITH NEUROMYELITIS OPTICA. Retin Cases Brief Rep. 2017
2628	Neurofilament light as an immune target for pathogenic antibodies.	Puentes F, van der Star BJ, Boomkamp SD, Kipp M, Boon L, Bosca I, Raffel J, Gnanapavan S, van der Valk P, Stephenson J, Barnett SC, Baker D, Amor S.	Immunology. 2017 Dec;152(4):580-588. doi: 10.1111/imm.12797. Epub 2017 Aug 11.	Immunology		2017			0.0343047		doi: 10.1111/imm.12797	28718500					0			0				0	0		doi: 10.1111/imm.12797	Puentes F, van der Star BJ, Boomkamp SD, Kipp M, Boon L, Bosca I, Raffel J, Gnanapavan S, van der Valk P, Stephenson J, Barnett SC, Baker D, Amor S., Neurofilament light as an immune target for pathogenic antibodies. Immunology. 2017
2832	Multiple and repeated sampling increases the sensitivity of direct immunofluorescence testing for the diagnosis of mucous membrane pemphigoid.	Shimanovich I, Nitz JM, Zillikens D.	J Am Acad Dermatol. 2017 Oct;77(4):700-705.e3. doi: 10.1016/j.jaad.2017.05.016. Epub 2017 Jul 1.	J Am Acad Dermatol		2017			0.0343706		doi: 10.1016/j.jaad.2017.05.016	28676329					0			0				0	0		doi: 10.1016/j.jaad.2017.05.016	Shimanovich I, Nitz JM, Zillikens D., Multiple and repeated sampling increases the sensitivity of direct immunofluorescence testing for the diagnosis of mucous membrane pemphigoid. J Am Acad Dermatol. 2017
8790	Spatial distributions of glutathione and its endogenous conjugates in normal bovine lens and a model of lens aging.	Nye-Wood MG, Spraggins JM, Caprioli RM, Schey KL, Donaldson PJ, Grey AC.	Exp Eye Res. 2017 Jan;154:70-78. doi: 10.1016/j.exer.2016.11.008. Epub 2016 Nov 9.	Exp Eye Res		2017			0.0343863		doi: 10.1016/j.exer.2016.11.008	27838309					0			0				0	0		doi: 10.1016/j.exer.2016.11.008	Nye-Wood MG, Spraggins JM, Caprioli RM, Schey KL, Donaldson PJ, Grey AC., Spatial distributions of glutathione and its endogenous conjugates in normal bovine lens and a model of lens aging. Exp Eye Res. 2017
5873	Divergence Palsy due to Divalproex and Oxcarbazepine.	Bouffard MA, Caplan LR, Torun N.	Clin Neuropharmacol. 2017 May/Jun;40(3):154-155. doi: 10.1097/WNF.0000000000000210.	Clin Neuropharmacol		2017			0.0344033		doi: 10.1097/WNF.0000000000000210	28277442					0			0				0	0		doi: 10.1097/WNF.0000000000000210	Bouffard MA, Caplan LR, Torun N., Divergence Palsy due to Divalproex and Oxcarbazepine. Clin Neuropharmacol. 2017
5453	Ophthalmic Screening Patterns Among Youths With Diabetes Enrolled in a Large US Managed Care Network.	Wang SY, Andrews CA, Gardner TW, Wood M, Singer K, Stein JD.	JAMA Ophthalmol. 2017 May 1;135(5):432-438. doi: 10.1001/jamaophthalmol.2017.0089.	JAMA Ophthalmol		2017			0.0344472		doi: 10.1001/jamaophthalmol.2017.0089	28334336					0			0				0	0		doi: 10.1001/jamaophthalmol.2017.0089	Wang SY, Andrews CA, Gardner TW, Wood M, Singer K, Stein JD., Ophthalmic Screening Patterns Among Youths With Diabetes Enrolled in a Large US Managed Care Network. JAMA Ophthalmol. 2017
8307	Drusen-like Deposits in Young Adults Diagnosed With Systemic Lupus Erythematosus.	Invernizzi A, dell'Arti L, Leone G, Galimberti D, Garoli E, Moroni G, Santaniello A, Agarwal A, Viola F.	Am J Ophthalmol. 2017 Mar;175:68-76. doi: 10.1016/j.ajo.2016.11.014. Epub 2016 Dec 7.	Am J Ophthalmol		2017			0.0344759		doi: 10.1016/j.ajo.2016.11.014	27939560					0			0				0	0		doi: 10.1016/j.ajo.2016.11.014	Invernizzi A, dell'Arti L, Leone G, Galimberti D, Garoli E, Moroni G, Santaniello A, Agarwal A, Viola F., Drusen-like Deposits in Young Adults Diagnosed With Systemic Lupus Erythematosus. Am J Ophthalmol. 2017
6733	Bilateral Blebs Secondary to Spontaneous Scleral Perforations.	Fernández López E, Poon A, Huhtanen A, Lindsay R, Green C.	J Glaucoma. 2017 Jun;26(6):e177-e179. doi: 10.1097/IJG.0000000000000631.	J Glaucoma		2017			0.034519		doi: 10.1097/IJG.0000000000000631	28169918					0			0				0	0		doi: 10.1097/IJG.0000000000000631	Fernández López E, Poon A, Huhtanen A, Lindsay R, Green C., Bilateral Blebs Secondary to Spontaneous Scleral Perforations. J Glaucoma. 2017
8450	Use of bioresorbable implants for orbital fracture reconstruction.	Young SM, Sundar G, Lim TC, Lang SS, Thomas G, Amrith S.	Br J Ophthalmol. 2017 Aug;101(8):1080-1085. doi: 10.1136/bjophthalmol-2016-309330. Epub 2016 Dec 2.	Br J Ophthalmol		2017			0.0345775		doi: 10.1136/bjophthalmol-2016-309330	27913446					0			0				0	0		doi: 10.1136/bjophthalmol-2016-309330	Young SM, Sundar G, Lim TC, Lang SS, Thomas G, Amrith S., Use of bioresorbable implants for orbital fracture reconstruction. Br J Ophthalmol. 2017
5907	Neovascular glaucoma after vitrectomy in patients with proliferative diabetic retinopathy.	Kwon JW, Jee D, La TY.	Medicine (Baltimore). 2017 Mar;96(10):e6263. doi: 10.1097/MD.0000000000006263.	Medicine (Baltimore)		2017			0.0346236		doi: 10.1097/MD.0000000000006263	28272234					0			0				0	0		doi: 10.1097/MD.0000000000006263	Kwon JW, Jee D, La TY., Neovascular glaucoma after vitrectomy in patients with proliferative diabetic retinopathy. Medicine (Baltimore). 2017
5977	Combined endocyclophotocoagulation and phacoemulsification in the management of moderate glaucoma.	Rathi S, Radcliffe NM.	Surv Ophthalmol. 2017 Sep - Oct;62(5):712-715. doi: 10.1016/j.survophthal.2017.01.011. Epub 2017 Mar 3. Review.	Surv Ophthalmol		2017			0.0346613		doi: 10.1016/j.survophthal.2017.01.011	28263763					0			0				0	0		doi: 10.1016/j.survophthal.2017.01.011	Rathi S, Radcliffe NM., Combined endocyclophotocoagulation and phacoemulsification in the management of moderate glaucoma. Surv Ophthalmol. 2017
3018	The resurgence of botulinum toxin injection for strabismus in children.	Mahan M, Engel JM.	Curr Opin Ophthalmol. 2017 Sep;28(5):460-464. doi: 10.1097/ICU.0000000000000408. Review.	Curr Opin Ophthalmol		2017			0.0346775		doi: 10.1097/ICU.0000000000000408	28650877					0			0				0	0		doi: 10.1097/ICU.0000000000000408	Mahan M, Engel JM., The resurgence of botulinum toxin injection for strabismus in children. Curr Opin Ophthalmol. 2017
3643	Genetic and environmental-genetic interaction rules for the myopia based on a family exposed to risk from a myopic environment.	Wenbo L, Congxia B, Hui L.	Gene. 2017 Aug 30;626:305-308. doi: 10.1016/j.gene.2017.05.051. Epub 2017 May 25.	Gene		2017			0.0347277		doi: 10.1016/j.gene.2017.05.051	28552714					0			0				0	0		doi: 10.1016/j.gene.2017.05.051	Wenbo L, Congxia B, Hui L., Genetic and environmental-genetic interaction rules for the myopia based on a family exposed to risk from a myopic environment. Gene. 2017
670	Impaired vestibular responses in internuclear ophthalmoplegia: Association and dissociation.	Choi SY, Kim HJ, Kim JS.	Neurology. 2017 Dec 12;89(24):2476-2480. doi: 10.1212/WNL.0000000000004745. Epub 2017 Nov 15.	Neurology		2017			0.0349081		doi: 10.1212/WNL.0000000000004745	29142084					0			0				0	0		doi: 10.1212/WNL.0000000000004745	Choi SY, Kim HJ, Kim JS., Impaired vestibular responses in internuclear ophthalmoplegia: Association and dissociation. Neurology. 2017
4643	Sex differences in micro- and macro-vascular complications of diabetes mellitus.	Maric-Bilkan C.	Clin Sci (Lond). 2017 May 1;131(9):833-846. doi: 10.1042/CS20160998. Review.	Clin Sci (Lond)		2017			0.0349717		doi: 10.1042/CS20160998	28424377					0			0				0	0		doi: 10.1042/CS20160998	Maric-Bilkan C., Sex differences in micro- and macro-vascular complications of diabetes mellitus. Clin Sci (Lond). 2017
2512	Somatostatin protects human retinal pericytes from inflammation mediated by microglia.	Mazzeo A, Arroba AI, Beltramo E, Valverde AM, Porta M.	Exp Eye Res. 2017 Nov;164:46-54. doi: 10.1016/j.exer.2017.07.011. Epub 2017 Jul 20.	Exp Eye Res		2017			0.0351706		doi: 10.1016/j.exer.2017.07.011	28734673					0			0				0	0		doi: 10.1016/j.exer.2017.07.011	Mazzeo A, Arroba AI, Beltramo E, Valverde AM, Porta M., Somatostatin protects human retinal pericytes from inflammation mediated by microglia. Exp Eye Res. 2017
1117	Patient Awareness of Cataract and Age-related Macular Degeneration among the Korean Elderly: A Population-based Study.	Lee H, Jang YJ, Lee HK, Kang HY.	Korean J Ophthalmol. 2017 Dec;31(6):557-567. doi: 10.3341/kjo.2017.0025. Epub 2017 Nov 24.	Korean J Ophthalmol		2017			0.0352254		doi: 10.3341/kjo.2017.0025	29022298					0			0				0	0		doi: 10.3341/kjo.2017.0025	Lee H, Jang YJ, Lee HK, Kang HY., Patient Awareness of Cataract and Age-related Macular Degeneration among the Korean Elderly: A Population-based Study. Korean J Ophthalmol. 2017
4599	Treatment-resistant neuromyelitis optica spectrum disorders associated with Toxocara canis infection: A case report.	Kambe D, Takeoka K, Ogawa K, Doi K, Maruyama H, Yoshida A, Suenaga T, Kageyama T.	Mult Scler Relat Disord. 2017 Apr;13:116-118. doi: 10.1016/j.msard.2017.02.014. Epub 2017 Feb 20.	Mult Scler Relat Disord		2017			0.0352316		doi: 10.1016/j.msard.2017.02.014	28427692					0			0				0	0		doi: 10.1016/j.msard.2017.02.014	Kambe D, Takeoka K, Ogawa K, Doi K, Maruyama H, Yoshida A, Suenaga T, Kageyama T., Treatment-resistant neuromyelitis optica spectrum disorders associated with Toxocara canis infection: A case report. Mult Scler Relat Disord. 2017
10757	Impact of fungal species cultured on outcome in horses with fungal keratitis.	Sherman AB, Clode AB, Gilger BC.	Vet Ophthalmol. 2017 Mar;20(2):140-146. doi: 10.1111/vop.12381. Epub 2016 Apr 7.	Vet Ophthalmol		2017			0.0352483		doi: 10.1111/vop.12381	27061354					0			0				0	0		doi: 10.1111/vop.12381	Sherman AB, Clode AB, Gilger BC., Impact of fungal species cultured on outcome in horses with fungal keratitis. Vet Ophthalmol. 2017
409	Comparison of Methodologies Using Estimated or Measured Values of Total Corneal Astigmatism for Toric Intraocular Lens Power Calculation.	Ferreira TB, Ribeiro P, Ribeiro FJ, O'Neill JG.	J Refract Surg. 2017 Dec 1;33(12):794-800. doi: 10.3928/1081597X-20171004-03.	J Refract Surg		2017			0.0356137		doi: 10.3928/1081597X-20171004-03	29227506					0			0				0	0		doi: 10.3928/1081597X-20171004-03	Ferreira TB, Ribeiro P, Ribeiro FJ, O'Neill JG., Comparison of Methodologies Using Estimated or Measured Values of Total Corneal Astigmatism for Toric Intraocular Lens Power Calculation. J Refract Surg. 2017
9022	Retinal neurovascular changes appear earlier in type 2 diabetic patients.	Pierro L, Iuliano L, Cicinelli MV, Casalino G, Bandello F.	Eur J Ophthalmol. 2017 May 11;27(3):346-351. doi: 10.5301/ejo.5000887. Epub 2016 Oct 22.	Eur J Ophthalmol		2017			0.0356437		doi: 10.5301/ejo.5000887	27791250					0			0				0	0		doi: 10.5301/ejo.5000887	Pierro L, Iuliano L, Cicinelli MV, Casalino G, Bandello F., Retinal neurovascular changes appear earlier in type 2 diabetic patients. Eur J Ophthalmol. 2017
10917	Ophthalmology in ancient Greece and Rome.	Miserachs García S, Castillo Campillo L.	Arch Soc Esp Oftalmol. 2017 Jan;92(1):e1-e3. doi: 10.1016/j.oftal.2015.12.018. Epub 2016 Feb 3. English, Spanish. No abstract available.	Arch Soc Esp Oftalmol		2017			0.0357278		doi: 10.1016/j.oftal.2015.12.018	26852318					0			0				0	0		doi: 10.1016/j.oftal.2015.12.018	Miserachs García S, Castillo Campillo L., Ophthalmology in ancient Greece and Rome. Arch Soc Esp Oftalmol. 2017
3139	Recombinant Human Nerve Growth Factor Treatment Promotes Photoreceptor Survival in the Retinas of Rats with Retinitis Pigmentosa.	Sacchetti M, Mantelli F, Rocco ML, Micera A, Brandolini L, Focareta L, Pisano C, Aloe L, Lambiase A.	Curr Eye Res. 2017 Jul;42(7):1064-1068. doi: 10.1080/02713683.2017.1279634. Epub 2017 Mar 1.	Curr Eye Res		2017			0.0361243		doi: 10.1080/02713683.2017.1279634	28632034					0			0				0	0		doi: 10.1080/02713683.2017.1279634	Sacchetti M, Mantelli F, Rocco ML, Micera A, Brandolini L, Focareta L, Pisano C, Aloe L, Lambiase A., Recombinant Human Nerve Growth Factor Treatment Promotes Photoreceptor Survival in the Retinas of Rats with Retinitis Pigmentosa. Curr Eye Res. 2017
7799	AIF-independent parthanatos in the pathogenesis of dry age-related macular degeneration.	Jang KH, Do YJ, Son D, Son E, Choi JS, Kim E.	Cell Death Dis. 2017 Jan 5;8(1):e2526. doi: 10.1038/cddis.2016.437.	Cell Death Dis		2017			0.0363892		doi: 10.1038/cddis.2016.437	28055012					0			0				0	0		doi: 10.1038/cddis.2016.437	Jang KH, Do YJ, Son D, Son E, Choi JS, Kim E., AIF-independent parthanatos in the pathogenesis of dry age-related macular degeneration. Cell Death Dis. 2017
1855	Mouse models of human ocular disease for translational research.	Krebs MP, Collin GB, Hicks WL, Yu M, Charette JR, Shi LY, Wang J, Naggert JK, Peachey NS, Nishina PM.	PLoS One. 2017 Aug 31;12(8):e0183837. doi: 10.1371/journal.pone.0183837. eCollection 2017.	PLoS One		2017			0.0364311		doi: 10.1371/journal.pone.0183837	28859131					0			0				0	0		doi: 10.1371/journal.pone.0183837	Krebs MP, Collin GB, Hicks WL, Yu M, Charette JR, Shi LY, Wang J, Naggert JK, Peachey NS, Nishina PM., Mouse models of human ocular disease for translational research. PLoS One. 2017
10003	Prevalence and quantification of geographic atrophy associated with newly diagnosed and treatment-naïve exudative age-related macular degeneration.	Sikorav A, Semoun O, Zweifel S, Jung C, Srour M, Querques G, Souied EH.	Br J Ophthalmol. 2017 Apr;101(4):438-444. doi: 10.1136/bjophthalmol-2015-308065. Epub 2016 Aug 8.	Br J Ophthalmol		2017			0.036609		doi: 10.1136/bjophthalmol-2015-308065	27503391					0			0				0	0		doi: 10.1136/bjophthalmol-2015-308065	Sikorav A, Semoun O, Zweifel S, Jung C, Srour M, Querques G, Souied EH., Prevalence and quantification of geographic atrophy associated with newly diagnosed and treatment-naïve exudative age-related macular degeneration. Br J Ophthalmol. 2017
2796	Morgagnian cataract resulting from a naturally occurring nonsense mutation elucidates a role of CPAMD8 in mammalian lens development.	Hollmann AK, Dammann I, Wemheuer WM, Wemheuer WE, Chilla A, Tipold A, Schulz-Schaeffer WJ, Beck J, Schütz E, Brenig B.	PLoS One. 2017 Jul 6;12(7):e0180665. doi: 10.1371/journal.pone.0180665. eCollection 2017.	PLoS One		2017			0.0366817		doi: 10.1371/journal.pone.0180665	28683140					0			0				0	0		doi: 10.1371/journal.pone.0180665	Hollmann AK, Dammann I, Wemheuer WM, Wemheuer WE, Chilla A, Tipold A, Schulz-Schaeffer WJ, Beck J, Schütz E, Brenig B., Morgagnian cataract resulting from a naturally occurring nonsense mutation elucidates a role of CPAMD8 in mammalian lens development. PLoS One. 2017
6892	Applications of antisense oligonucleotides for the treatment of inherited retinal diseases.	Collin RW, Garanto A.	Curr Opin Ophthalmol. 2017 May;28(3):260-266. doi: 10.1097/ICU.0000000000000363. Review.	Curr Opin Ophthalmol		2017			0.036749		doi: 10.1097/ICU.0000000000000363	28151748					0			0				0	0		doi: 10.1097/ICU.0000000000000363	Collin RW, Garanto A., Applications of antisense oligonucleotides for the treatment of inherited retinal diseases. Curr Opin Ophthalmol. 2017
9309	Long-term Outcomes of Pediatric Penetrating Keratoplasty for Herpes Simplex Virus Keratitis.	Serna-Ojeda JC, Loya-Garcia D, Navas A, Lichtinger A, Ramirez-Miranda A, Graue-Hernandez EO.	Am J Ophthalmol. 2017 Jan;173:139-144. doi: 10.1016/j.ajo.2016.09.037. Epub 2016 Oct 14.	Am J Ophthalmol		2017			0.0368965		doi: 10.1016/j.ajo.2016.09.037	27746299					0			0				0	0		doi: 10.1016/j.ajo.2016.09.037	Serna-Ojeda JC, Loya-Garcia D, Navas A, Lichtinger A, Ramirez-Miranda A, Graue-Hernandez EO., Long-term Outcomes of Pediatric Penetrating Keratoplasty for Herpes Simplex Virus Keratitis. Am J Ophthalmol. 2017
3045	Effects of nicotine on corneal wound healing following acute alkali burn.	Kim JW, Lim CW, Kim B.	PLoS One. 2017 Jun 23;12(6):e0179982. doi: 10.1371/journal.pone.0179982. eCollection 2017.	PLoS One		2017			0.0370161		doi: 10.1371/journal.pone.0179982	28644870					0			0				0	0		doi: 10.1371/journal.pone.0179982	Kim JW, Lim CW, Kim B., Effects of nicotine on corneal wound healing following acute alkali burn. PLoS One. 2017
6357	Dysregulated GPCR Signaling and Therapeutic Options in Uveal Melanoma.	Chua V, Lapadula D, Randolph C, Benovic JL, Wedegaertner PB, Aplin AE.	Mol Cancer Res. 2017 May;15(5):501-506. doi: 10.1158/1541-7786.MCR-17-0007. Epub 2017 Feb 21. Review.	Mol Cancer Res		2017			0.0370697		doi: 10.1158/1541-7786.MCR-17-0007	28223438					0			0				0	0		doi: 10.1158/1541-7786.MCR-17-0007	Chua V, Lapadula D, Randolph C, Benovic JL, Wedegaertner PB, Aplin AE., Dysregulated GPCR Signaling and Therapeutic Options in Uveal Melanoma. Mol Cancer Res. 2017
10673	Mass drug administration: the importance of synchrony.	Gao D, Lietman TM, Dong CP, Porco TC.	Math Med Biol. 2017 Jun 1;34(2):241-260. doi: 10.1093/imammb/dqw005.	Math Med Biol		2017			0.0371165		doi: 10.1093/imammb/dqw005	27118395					0			0				0	0		doi: 10.1093/imammb/dqw005	Gao D, Lietman TM, Dong CP, Porco TC., Mass drug administration: the importance of synchrony. Math Med Biol. 2017
2314	Morphology of the optic disc in the Tajimi Study population.	Mataki N, Tomidokoro A, Araie M, Iwase A.	Jpn J Ophthalmol. 2017 Nov;61(6):441-447. doi: 10.1007/s10384-017-0526-9. Epub 2017 Aug 2.	Jpn J Ophthalmol		2017			0.0371235		doi: 10.1007/s10384-017-0526-9	28770355					0			0				0	0		doi: 10.1007/s10384-017-0526-9	Mataki N, Tomidokoro A, Araie M, Iwase A., Morphology of the optic disc in the Tajimi Study population. Jpn J Ophthalmol. 2017
11097	Solitary Mastocytoma of the Eyelid in an Adult Patient With Prolidase Deficiency.	Ma SP, Hardy TG.	Ophthal Plast Reconstr Surg. 2017 Jan/Feb;33(1):e10-e13. doi: 10.1097/IOP.0000000000000376.	Ophthal Plast Reconstr Surg		2017			0.0371534		doi: 10.1097/IOP.0000000000000376	25603535					0			0				0	0		doi: 10.1097/IOP.0000000000000376	Ma SP, Hardy TG., Solitary Mastocytoma of the Eyelid in an Adult Patient With Prolidase Deficiency. Ophthal Plast Reconstr Surg. 2017
3482	Two-staged en bloc excision of a retinal haemangioma.	Jhingan M, Chhablani J, Agarwal K, Rani PK.	BMJ Case Rep. 2017 Jun 3;2017. pii: bcr-2017-220216. doi: 10.1136/bcr-2017-220216.	BMJ Case Rep		2017			0.0372884		doi: 10.1136/bcr-2017-220216	28578309					0			0				0	0		doi: 10.1136/bcr-2017-220216	Jhingan M, Chhablani J, Agarwal K, Rani PK., Two-staged en bloc excision of a retinal haemangioma. BMJ Case Rep. 2017
4154	Severe delayed-type hypersensitivity to chloramphenicol with systemic reactivation during intradermal testing.	Watts TJ.	Ann Allergy Asthma Immunol. 2017 May;118(5):644-645. doi: 10.1016/j.anai.2017.03.004. No abstract available.	Ann Allergy Asthma Immunol		2017			0.0373488		doi: 10.1016/j.anai.2017.03.004	28477797					0			0				0	0		doi: 10.1016/j.anai.2017.03.004	Watts TJ., Severe delayed-type hypersensitivity to chloramphenicol with systemic reactivation during intradermal testing. Ann Allergy Asthma Immunol. 2017
1997	Recovery From Amiodarone-Induced Cornea Verticillata by Application of Topical Heparin.	Frings A, Schargus M.	Cornea. 2017 Nov;36(11):1419-1422. doi: 10.1097/ICO.0000000000001306.	Cornea		2017			0.0375692		doi: 10.1097/ICO.0000000000001306	28834813					0			0				0	0		doi: 10.1097/ICO.0000000000001306	Frings A, Schargus M., Recovery From Amiodarone-Induced Cornea Verticillata by Application of Topical Heparin. Cornea. 2017
6235	Treatment with grass allergen peptides improves symptoms of grass pollen-induced allergic rhinoconjunctivitis.	Ellis AK, Frankish CW, O'Hehir RE, Armstrong K, Steacy L, Larché M, Hafner RP.	J Allergy Clin Immunol. 2017 Aug;140(2):486-496. doi: 10.1016/j.jaci.2016.11.043. Epub 2017 Feb 21.	J Allergy Clin Immunol		2017			0.0376389		doi: 10.1016/j.jaci.2016.11.043	28236469					0			0				0	0		doi: 10.1016/j.jaci.2016.11.043	Ellis AK, Frankish CW, O'Hehir RE, Armstrong K, Steacy L, Larché M, Hafner RP., Treatment with grass allergen peptides improves symptoms of grass pollen-induced allergic rhinoconjunctivitis. J Allergy Clin Immunol. 2017
6480	Incidence and Visual Outcomes of Culture-Proven Endophthalmitis Following Dexamethasone Intravitreal Implant.	Stem MS, Todorich B, Yonekawa Y, Capone A Jr, Williams GA, Ruby AJ.	JAMA Ophthalmol. 2017 Apr 1;135(4):379-382. doi: 10.1001/jamaophthalmol.2016.5883.	JAMA Ophthalmol		2017			0.0376512		doi: 10.1001/jamaophthalmol.2016.5883	28208166					0			0				0	0		doi: 10.1001/jamaophthalmol.2016.5883	Stem MS, Todorich B, Yonekawa Y, Capone A Jr, Williams GA, Ruby AJ., Incidence and Visual Outcomes of Culture-Proven Endophthalmitis Following Dexamethasone Intravitreal Implant. JAMA Ophthalmol. 2017
1684	Iridodonesis.	Desai D, Tajik AJ.	N Engl J Med. 2017 Sep 14;377(11):e14. doi: 10.1056/NEJMicm1615424. No abstract available.	N Engl J Med		2017			0.0376843		doi: 10.1056/NEJMicm1615424	28902597					0			0				0	0		doi: 10.1056/NEJMicm1615424	Desai D, Tajik AJ., Iridodonesis. N Engl J Med. 2017
1823	Evaluation of carbon dioxide laser therapy for benign tumors of the eyelid margin.	Rentka A, Grygar J, Nemes Z, Kemeny-Beke A.	Lasers Med Sci. 2017 Nov;32(8):1901-1907. doi: 10.1007/s10103-017-2309-4. Epub 2017 Sep 2.	Lasers Med Sci		2017			0.0377141		doi: 10.1007/s10103-017-2309-4	28864923					0			0				0	0		doi: 10.1007/s10103-017-2309-4	Rentka A, Grygar J, Nemes Z, Kemeny-Beke A., Evaluation of carbon dioxide laser therapy for benign tumors of the eyelid margin. Lasers Med Sci. 2017
6654	Optic disc, rim and peripapillary chorioretinal atrophy in normal Japanese eyes: the Kumejima Study.	Iwase A, Sawaguchi S, Sakai H, Tanaka K, Tsutsumi T, Araie M.	Jpn J Ophthalmol. 2017 May;61(3):223-229. doi: 10.1007/s10384-017-0499-8. Epub 2017 Feb 9.	Jpn J Ophthalmol		2017			0.0379639		doi: 10.1007/s10384-017-0499-8	28185066					0			0				0	0		doi: 10.1007/s10384-017-0499-8	Iwase A, Sawaguchi S, Sakai H, Tanaka K, Tsutsumi T, Araie M., Optic disc, rim and peripapillary chorioretinal atrophy in normal Japanese eyes: the Kumejima Study. Jpn J Ophthalmol. 2017
2862	Micropulse Cyclophotocoagulation: Initial Results in Refractory Glaucoma.	Emanuel ME, Grover DS, Fellman RL, Godfrey DG, Smith O, Butler MR, Kornmann HL, Feuer WJ, Goyal S.	J Glaucoma. 2017 Aug;26(8):726-729. doi: 10.1097/IJG.0000000000000715.	J Glaucoma		2017			0.0380216		doi: 10.1097/IJG.0000000000000715	28671927					0			0				0	0		doi: 10.1097/IJG.0000000000000715	Emanuel ME, Grover DS, Fellman RL, Godfrey DG, Smith O, Butler MR, Kornmann HL, Feuer WJ, Goyal S., Micropulse Cyclophotocoagulation: Initial Results in Refractory Glaucoma. J Glaucoma. 2017
1243	Antibody-based immunotherapy of aciclovir resistant ocular herpes simplex virus infections.	Bauer D, Keller J, Alt M, Schubert A, Aufderhorst UW, Palapys V, Kasper M, Heilingloh CS, Dittmer U, Laffer B, Eis-Hübinger AM, Verjans GM, Heiligenhaus A, Roggendorf M, Krawczyk A.	Virology. 2017 Dec;512:194-200. doi: 10.1016/j.virol.2017.09.021. Epub 2017 Oct 3.	Virology		2017			0.0380682		doi: 10.1016/j.virol.2017.09.021	28985573					0			0				0	0		doi: 10.1016/j.virol.2017.09.021	Bauer D, Keller J, Alt M, Schubert A, Aufderhorst UW, Palapys V, Kasper M, Heilingloh CS, Dittmer U, Laffer B, Eis-Hübinger AM, Verjans GM, Heiligenhaus A, Roggendorf M, Krawczyk A., Antibody-based immunotherapy of aciclovir resistant ocular herpes simplex virus infections. Virology. 2017
8616	High-frequency aflibercept injections in persistent neovascular age-related macular degeneration.	Muftuoglu IK, Tsai FF, Gaber R, Alam M, Meshi A, Freeman WR.	Graefes Arch Clin Exp Ophthalmol. 2017 Apr;255(4):709-717. doi: 10.1007/s00417-016-3547-z. Epub 2016 Nov 23. Erratum in: Graefes Arch Clin Exp Ophthalmol. 2017 Jul;255 (7):1463.	Graefes Arch Clin Exp Ophthalmol		2017			0.0381541		doi: 10.1007/s00417-016-3547-z	27878592					0			0				0	0		doi: 10.1007/s00417-016-3547-z	Muftuoglu IK, Tsai FF, Gaber R, Alam M, Meshi A, Freeman WR., High-frequency aflibercept injections in persistent neovascular age-related macular degeneration. Graefes Arch Clin Exp Ophthalmol. 2017
10184	Comparison of the Adaptive Optics Vision Analyzer and the KR-1 W for measuring ocular wave aberrations.	Otero C, Vilaseca M, Arjona M, Martínez-Roda JA, Pujol J.	Clin Exp Optom. 2017 Jan;100(1):26-32. doi: 10.1111/cxo.12413. Epub 2016 Jul 19.	Clin Exp Optom		2017			0.0381934		doi: 10.1111/cxo.12413	27432594					0			0				0	0		doi: 10.1111/cxo.12413	Otero C, Vilaseca M, Arjona M, Martínez-Roda JA, Pujol J., Comparison of the Adaptive Optics Vision Analyzer and the KR-1 W for measuring ocular wave aberrations. Clin Exp Optom. 2017
2168	Absent cardiac and muscle sympathetic nerve activities involvement in Ross syndrome: A follow-up study.	Fileccia E, Liguori R, Cortelli P, Donadio V.	Auton Neurosci. 2017 Dec;208:161-164. doi: 10.1016/j.autneu.2017.08.003. Epub 2017 Aug 9.	Auton Neurosci		2017			0.0383595		doi: 10.1016/j.autneu.2017.08.003	28807531					0			0				0	0		doi: 10.1016/j.autneu.2017.08.003	Fileccia E, Liguori R, Cortelli P, Donadio V., Absent cardiac and muscle sympathetic nerve activities involvement in Ross syndrome: A follow-up study. Auton Neurosci. 2017
1204	Hydrogen Sulfide Protects Retinal Ganglion Cells Against Glaucomatous Injury In Vitro and In Vivo.	Liu H, Anders F, Thanos S, Mann C, Liu A, Grus FH, Pfeiffer N, Prokosch-Willing V.	Invest Ophthalmol Vis Sci. 2017 Oct 1;58(12):5129-5141. doi: 10.1167/iovs.17-22200.	Invest Ophthalmol Vis Sci		2017			0.0383905		doi: 10.1167/iovs.17-22200	28986598					0			0				0	0		doi: 10.1167/iovs.17-22200	Liu H, Anders F, Thanos S, Mann C, Liu A, Grus FH, Pfeiffer N, Prokosch-Willing V., Hydrogen Sulfide Protects Retinal Ganglion Cells Against Glaucomatous Injury In Vitro and In Vivo. Invest Ophthalmol Vis Sci. 2017
5497	Effect of topical isopropyl unoprostone on macular atrophy progression in eyes with exudative age-related macular degeneration.	Shiragami C, Miyake M, Fujiwara A, Morizane Y, Tsujikawa A, Yamashita A, Shiraga F.	Medicine (Baltimore). 2017 Mar;96(12):e6422. doi: 10.1097/MD.0000000000006422.	Medicine (Baltimore)		2017			0.0384402		doi: 10.1097/MD.0000000000006422	28328847					0			0				0	0		doi: 10.1097/MD.0000000000006422	Shiragami C, Miyake M, Fujiwara A, Morizane Y, Tsujikawa A, Yamashita A, Shiraga F., Effect of topical isopropyl unoprostone on macular atrophy progression in eyes with exudative age-related macular degeneration. Medicine (Baltimore). 2017
8389	Nrf2 protects photoreceptor cells from photo-oxidative stress induced by blue light.	Chen WJ, Wu C, Xu Z, Kuse Y, Hara H, Duh EJ.	Exp Eye Res. 2017 Jan;154:151-158. doi: 10.1016/j.exer.2016.12.001. Epub 2016 Dec 5.	Exp Eye Res		2017			0.0384721		doi: 10.1016/j.exer.2016.12.001	27923559					0			0				0	0		doi: 10.1016/j.exer.2016.12.001	Chen WJ, Wu C, Xu Z, Kuse Y, Hara H, Duh EJ., Nrf2 protects photoreceptor cells from photo-oxidative stress induced by blue light. Exp Eye Res. 2017
3680	Diagnosis of enlarged extraocular muscles: when and how to biopsy.	Mombaerts I, Rose GE, Verity DH.	Curr Opin Ophthalmol. 2017 Sep;28(5):514-521. doi: 10.1097/ICU.0000000000000395. Review.	Curr Opin Ophthalmol		2017			0.0385364		doi: 10.1097/ICU.0000000000000395	28549017					0			0				0	0		doi: 10.1097/ICU.0000000000000395	Mombaerts I, Rose GE, Verity DH., Diagnosis of enlarged extraocular muscles: when and how to biopsy. Curr Opin Ophthalmol. 2017
3311	Full-thickness macular hole formation following anti-VEGF injections for neovascular age-related macular degeneration.	Kabanarou SA, Xirou T, Mangouritsas G, Garnavou-Xirou C, Boutouri E, Gkizis I, Chatziralli I.	Clin Interv Aging. 2017 May 26;12:911-915. doi: 10.2147/CIA.S135364. eCollection 2017.	Clin Interv Aging		2017			0.0385754		doi: 10.2147/CIA.S135364	28603410					0			0				0	0		doi: 10.2147/CIA.S135364	Kabanarou SA, Xirou T, Mangouritsas G, Garnavou-Xirou C, Boutouri E, Gkizis I, Chatziralli I., Full-thickness macular hole formation following anti-VEGF injections for neovascular age-related macular degeneration. Clin Interv Aging. 2017
2005	Tacrolimus eye drops as monotherapy for vernal keratoconjunctivitis: a randomized controlled trial.	Müller EG, Santos MSD, Freitas D, Gomes JÁP, Belfort R Jr.	Arq Bras Oftalmol. 2017 Jun;80(3):154-158. doi: 10.5935/0004-2749.20170038.	Arq Bras Oftalmol		2017			0.0385837		doi: 10.5935/0004-2749.20170038	28832739					0			0				0	0		doi: 10.5935/0004-2749.20170038	Müller EG, Santos MSD, Freitas D, Gomes JÁP, Belfort R Jr., Tacrolimus eye drops as monotherapy for vernal keratoconjunctivitis: a randomized controlled trial. Arq Bras Oftalmol. 2017
2978	Effect of intravitreal ranibizumab on the ocular circulation of the untreated fellow eye.	Sugimoto M, Nunome T, Sakamoto R, Kobayashi M, Kondo M.	Graefes Arch Clin Exp Ophthalmol. 2017 Aug;255(8):1543-1550. doi: 10.1007/s00417-017-3692-z. Epub 2017 Jun 28.	Graefes Arch Clin Exp Ophthalmol		2017			0.0385982		doi: 10.1007/s00417-017-3692-z	28656342					0			0				0	0		doi: 10.1007/s00417-017-3692-z	Sugimoto M, Nunome T, Sakamoto R, Kobayashi M, Kondo M., Effect of intravitreal ranibizumab on the ocular circulation of the untreated fellow eye. Graefes Arch Clin Exp Ophthalmol. 2017
2113	Reproducibility of Central Corneal Thickness Measurements in Healthy and Glaucomatous Eyes.	Realini T, Gurka MJ, Weinreb RN.	J Glaucoma. 2017 Sep;26(9):787-791. doi: 10.1097/IJG.0000000000000738.	J Glaucoma		2017			0.0386639		doi: 10.1097/IJG.0000000000000738	28816818					0			0				0	0		doi: 10.1097/IJG.0000000000000738	Realini T, Gurka MJ, Weinreb RN., Reproducibility of Central Corneal Thickness Measurements in Healthy and Glaucomatous Eyes. J Glaucoma. 2017
9536	Immune Checkpoint Inhibitors for Treatment of Metastatic Melanoma of the Orbit and Ocular Adnexa.	Ford J, Thuro BA, Thakar S, Hwu WJ, Richani K, Esmaeli B.	Ophthal Plast Reconstr Surg. 2017 Jul/Aug;33(4):e82-e85. doi: 10.1097/IOP.0000000000000790.	Ophthal Plast Reconstr Surg		2017			0.0388261		doi: 10.1097/IOP.0000000000000790	27662198					0			0				0	0		doi: 10.1097/IOP.0000000000000790	Ford J, Thuro BA, Thakar S, Hwu WJ, Richani K, Esmaeli B., Immune Checkpoint Inhibitors for Treatment of Metastatic Melanoma of the Orbit and Ocular Adnexa. Ophthal Plast Reconstr Surg. 2017
9509	UNILATERAL BEST DISEASE: A CASE REPORT.	Kaden TR, Tan AC, Feiner L, Freund KB.	Retin Cases Brief Rep. 2017 Winter;11 Suppl 1:S191-S196. doi: 10.1097/ICB.0000000000000431.	Retin Cases Brief Rep		2017			0.0388269		doi: 10.1097/ICB.0000000000000431	27668499					0			0				0	0		doi: 10.1097/ICB.0000000000000431	Kaden TR, Tan AC, Feiner L, Freund KB., UNILATERAL BEST DISEASE: A CASE REPORT. Retin Cases Brief Rep. 2017
4214	Phenotype-genotype correlation with Sanger sequencing identified retinol dehydrogenase 12 (RDH12) compound heterozygous variants in a Chinese family with Leber congenital amaurosis.	Li Y, Pan Q, Gu YS.	J Zhejiang Univ Sci B. 2017 May;18(5):421-429. doi: 10.1631/jzus.B1600156.	J Zhejiang Univ Sci B		2017			0.0388589		doi: 10.1631/jzus.B1600156	28471114					0			0				0	0		doi: 10.1631/jzus.B1600156	Li Y, Pan Q, Gu YS., Phenotype-genotype correlation with Sanger sequencing identified retinol dehydrogenase 12 (RDH12) compound heterozygous variants in a Chinese family with Leber congenital amaurosis. J Zhejiang Univ Sci B. 2017
9025	The use of Mersilene mesh for tendon elongation in restrictive strabismus due to Graves disease.	Schittkowski MP.	Eur J Ophthalmol. 2017 Mar 10;27(2):e59. doi: 10.5301/ejo.5000895. No abstract available.	Eur J Ophthalmol		2017			0.0389994		doi: 10.5301/ejo.5000895	27791247					0			0				0	0		doi: 10.5301/ejo.5000895	Schittkowski MP., The use of Mersilene mesh for tendon elongation in restrictive strabismus due to Graves disease. Eur J Ophthalmol. 2017
5525	Regenerative Responses and Axon Pathfinding of Retinal Ganglion Cells in Chronically Injured Mice.	Yungher BJ, Ribeiro M, Park KK.	Invest Ophthalmol Vis Sci. 2017 Mar 1;58(3):1743-1750. doi: 10.1167/iovs.16-19873.	Invest Ophthalmol Vis Sci		2017			0.0390863		doi: 10.1167/iovs.16-19873	28324115					0			0				0	0		doi: 10.1167/iovs.16-19873	Yungher BJ, Ribeiro M, Park KK., Regenerative Responses and Axon Pathfinding of Retinal Ganglion Cells in Chronically Injured Mice. Invest Ophthalmol Vis Sci. 2017
10456	RITONAVIR-ASSOCIATED TOXICITY MIMICKING RETINITIS PIGMENTOSA IN AN HIV-INFECTED PATIENT ON HIGHLY ACTIVE ANTIRETROVIRAL THERAPY.	Papavasileiou E, Younis S, Zygoura V, Quijano C, Jackson TL.	Retin Cases Brief Rep. 2017 Fall;11(4):306-309. doi: 10.1097/ICB.0000000000000350.	Retin Cases Brief Rep		2017			0.0394759		doi: 10.1097/ICB.0000000000000350	27285286					0			0				0	0		doi: 10.1097/ICB.0000000000000350	Papavasileiou E, Younis S, Zygoura V, Quijano C, Jackson TL., RITONAVIR-ASSOCIATED TOXICITY MIMICKING RETINITIS PIGMENTOSA IN AN HIV-INFECTED PATIENT ON HIGHLY ACTIVE ANTIRETROVIRAL THERAPY. Retin Cases Brief Rep. 2017
6162	Evaluation of changes in magnetic resonance diffusion tensor imaging of the bilateral optic tract in monocular blind rats.	Wang R, Zhong Y, Tang W, Tang Z, Sun X, Feng X, Fan J, Wu L, Wang J, Xiao Z, Jin L.	Int J Dev Neurosci. 2017 Jun;59:10-14. doi: 10.1016/j.ijdevneu.2017.02.006. Epub 2017 Feb 24.	Int J Dev Neurosci		2017			0.0396158		doi: 10.1016/j.ijdevneu.2017.02.006	28242183					0			0				0	0		doi: 10.1016/j.ijdevneu.2017.02.006	Wang R, Zhong Y, Tang W, Tang Z, Sun X, Feng X, Fan J, Wu L, Wang J, Xiao Z, Jin L., Evaluation of changes in magnetic resonance diffusion tensor imaging of the bilateral optic tract in monocular blind rats. Int J Dev Neurosci. 2017
2309	Atrial fibrillation in retinal vascular occlusion disease and non-arteritic anterior ischemic optic neuropathy.	Callizo J, Feltgen N, Ammermann A, Ganser J, Bemme S, Bertelmann T, Pfeiffer S, Duvinage A, Gröschel K, Hoerauf H, Wachter R.	PLoS One. 2017 Aug 3;12(8):e0181766. doi: 10.1371/journal.pone.0181766. eCollection 2017.	PLoS One		2017			0.0397418		doi: 10.1371/journal.pone.0181766	28771491					0			0				0	0		doi: 10.1371/journal.pone.0181766	Callizo J, Feltgen N, Ammermann A, Ganser J, Bemme S, Bertelmann T, Pfeiffer S, Duvinage A, Gröschel K, Hoerauf H, Wachter R., Atrial fibrillation in retinal vascular occlusion disease and non-arteritic anterior ischemic optic neuropathy. PLoS One. 2017
7124	Discordant mRNA and protein expression of CXCR4 under in vitro CoCl(2)-induced hypoxic conditions.	Tang M, Yang Y, Yu J, Wu N, Chen P, Xu L, Wang Q, Xu Z, Ge J, Yu K, Zhuang J.	Biochem Biophys Res Commun. 2017 Mar 4;484(2):285-291. doi: 10.1016/j.bbrc.2017.01.102. Epub 2017 Jan 23.	Biochem Biophys Res Commun		2017			0.0398271		doi: 10.1016/j.bbrc.2017.01.102	28126341					0			0				0	0		doi: 10.1016/j.bbrc.2017.01.102	Tang M, Yang Y, Yu J, Wu N, Chen P, Xu L, Wang Q, Xu Z, Ge J, Yu K, Zhuang J., Discordant mRNA and protein expression of CXCR4 under in vitro CoCl(2)-induced hypoxic conditions. Biochem Biophys Res Commun. 2017
3264	The mixture of bifidobacterium associated with fructo-oligosaccharides reduces the damage of the ocular surface.	Chisari G, Chisari EM, Francaviglia A, Chisari CG.	Clin Ter. 2017 May-Jun;168(3):e181-e185. doi: 10.7417/T.2017.2002.	Clin Ter		2017			0.0399375		doi: 10.7417/T.2017.2002	28612893					0			0				0	0		doi: 10.7417/T.2017.2002	Chisari G, Chisari EM, Francaviglia A, Chisari CG., The mixture of bifidobacterium associated with fructo-oligosaccharides reduces the damage of the ocular surface. Clin Ter. 2017
5244	TGFBI gene mutations analysis in Chinese families with corneal dystrophies.	Wang X, Ying M, Fu C, Wang Y, Li N.	Mol Med Rep. 2017 May;15(5):3198-3202. doi: 10.3892/mmr.2017.6414. Epub 2017 Mar 30.	Mol Med Rep		2017			0.0399544		doi: 10.3892/mmr.2017.6414	28358433					0			0				0	0		doi: 10.3892/mmr.2017.6414	Wang X, Ying M, Fu C, Wang Y, Li N., TGFBI gene mutations analysis in Chinese families with corneal dystrophies. Mol Med Rep. 2017
9157	Reversal of functional loss in a rat model of chronic intraocular pressure elevation.	Liu HH, He Z, Nguyen CT, Vingrys AJ, Bui BV.	Ophthalmic Physiol Opt. 2017 Jan;37(1):71-81. doi: 10.1111/opo.12331. Epub 2016 Oct 24.	Ophthalmic Physiol Opt		2017			0.0400024		doi: 10.1111/opo.12331	27774623					0			0				0	0		doi: 10.1111/opo.12331	Liu HH, He Z, Nguyen CT, Vingrys AJ, Bui BV., Reversal of functional loss in a rat model of chronic intraocular pressure elevation. Ophthalmic Physiol Opt. 2017
3169	Limbal xanthogranuloma in a dog.	Ota-Kuroki J, Kuroki K.	J Vet Med Sci. 2017 Jul 19;79(7):1240-1244. doi: 10.1292/jvms.17-0251. Epub 2017 Jun 15.	J Vet Med Sci		2017			0.0400501		doi: 10.1292/jvms.17-0251	28626159					0			0				0	0		doi: 10.1292/jvms.17-0251	Ota-Kuroki J, Kuroki K., Limbal xanthogranuloma in a dog. J Vet Med Sci. 2017
7632	Short-term treatment with oral amiodarone resulting in bilateral optic neuropathy and permanent blindness.	Knudsen A.	BMJ Case Rep. 2017 Jan 9;2017. pii: bcr2016217436. doi: 10.1136/bcr-2016-217436.	BMJ Case Rep		2017			0.0400587		doi: 10.1136/bcr-2016-217436	28069784					0			0				0	0		doi: 10.1136/bcr-2016-217436	Knudsen A., Short-term treatment with oral amiodarone resulting in bilateral optic neuropathy and permanent blindness. BMJ Case Rep. 2017
10527	Safety and complications of intravitreal injections performed in an Asian population in Singapore.	Xu Y, Tan CS.	Int Ophthalmol. 2017 Apr;37(2):325-332. doi: 10.1007/s10792-016-0241-4. Epub 2016 May 28.	Int Ophthalmol		2017			0.0401442		doi: 10.1007/s10792-016-0241-4	27236451					0			0				0	0		doi: 10.1007/s10792-016-0241-4	Xu Y, Tan CS., Safety and complications of intravitreal injections performed in an Asian population in Singapore. Int Ophthalmol. 2017
2145	Physiological and Optical Alterations Precede the Appearance of Cataracts in Cx46fs380 Mice.	Minogue PJ, Gao J, Zoltoski RK, Novak LA, Mathias RT, Beyer EC, Berthoud VM.	Invest Ophthalmol Vis Sci. 2017 Aug 1;58(10):4366–4374. doi: 10.1167/iovs.17-21684. Erratum in: Invest Ophthalmol Vis Sci. 2017 Sep 1;58(11):4799.	Invest Ophthalmol Vis Sci		2017			0.0401974		doi: 10.1167/iovs.17-21684	28810266					0			0				0	0		doi: 10.1167/iovs.17-21684	Minogue PJ, Gao J, Zoltoski RK, Novak LA, Mathias RT, Beyer EC, Berthoud VM., Physiological and Optical Alterations Precede the Appearance of Cataracts in Cx46fs380 Mice. Invest Ophthalmol Vis Sci. 2017
10468	Visual Discomfort While Viewing Three-dimensional Television as a Screening Tool for Pediatric Eye Diseases in Children.	Suh YW, Kim SH, Ha SG, Seo H, Ahn J.	Curr Eye Res. 2017 Jan;42(1):155-160. doi: 10.3109/02713683.2016.1158271. Epub 2016 Jun 7.	Curr Eye Res		2017			0.0402994		doi: 10.3109/02713683.2016.1158271	27269767					0			0				0	0		doi: 10.3109/02713683.2016.1158271	Suh YW, Kim SH, Ha SG, Seo H, Ahn J., Visual Discomfort While Viewing Three-dimensional Television as a Screening Tool for Pediatric Eye Diseases in Children. Curr Eye Res. 2017
2421	Elimination of Anterior Corneal Steepening With Descemet Membrane Endothelial Keratoplasty in a Patient With Fuchs Dystrophy and Keratoconus: Implications for IOL Calculation.	Gupta R, Kinderyte R, Jacobs DS, Jurkunas UV.	Cornea. 2017 Oct;36(10):1260-1262. doi: 10.1097/ICO.0000000000001309.	Cornea		2017			0.0403069		doi: 10.1097/ICO.0000000000001309	28749896					0			0				0	0		doi: 10.1097/ICO.0000000000001309	Gupta R, Kinderyte R, Jacobs DS, Jurkunas UV., Elimination of Anterior Corneal Steepening With Descemet Membrane Endothelial Keratoplasty in a Patient With Fuchs Dystrophy and Keratoconus: Implications for IOL Calculation. Cornea. 2017
78	Localized Trichiasis Causing Focal Full-Thickness Corneal Edema, Endothelial Cell Loss, and Corneal Scarring Requiring Penetrating Keratoplasty.	Liu TS, Meskin S.	Middle East Afr J Ophthalmol. 2017 Oct-Dec;24(4):216-218. doi: 10.4103/meajo.MEAJO_304_16.	Middle East Afr J Ophthalmol		2017			0.0406229		doi: 10.4103/meajo.MEAJO_304_16	29422758					0			0				0	0		doi: 10.4103/meajo.MEAJO_304_16	Liu TS, Meskin S., Localized Trichiasis Causing Focal Full-Thickness Corneal Edema, Endothelial Cell Loss, and Corneal Scarring Requiring Penetrating Keratoplasty. Middle East Afr J Ophthalmol. 2017
7751	Ritonavir and Topical Ocular Corticosteroid Induced Cushing's Syndrome in an Adolescent With HIV-1 Infection.	Rainsbury PG, Sharp J, Tappin A, Hussey M, Lenko A, Foster C.	Pediatr Infect Dis J. 2017 May;36(5):502-503. doi: 10.1097/INF.0000000000001534.	Pediatr Infect Dis J		2017			0.0407871		doi: 10.1097/INF.0000000000001534	28060049					0			0				0	0		doi: 10.1097/INF.0000000000001534	Rainsbury PG, Sharp J, Tappin A, Hussey M, Lenko A, Foster C., Ritonavir and Topical Ocular Corticosteroid Induced Cushing's Syndrome in an Adolescent With HIV-1 Infection. Pediatr Infect Dis J. 2017
4423	Individuals with severely impaired vision can learn useful orientation and mobility skills in virtual streets and can use them to improve real street safety.	Bowman EL, Liu L.	PLoS One. 2017 Apr 26;12(4):e0176534. doi: 10.1371/journal.pone.0176534. eCollection 2017.	PLoS One		2017			0.0408968		doi: 10.1371/journal.pone.0176534	28445540					0			0				0	0		doi: 10.1371/journal.pone.0176534	Bowman EL, Liu L., Individuals with severely impaired vision can learn useful orientation and mobility skills in virtual streets and can use them to improve real street safety. PLoS One. 2017
1907	Video Game Vision Syndrome: A New Clinical Picture in Children?	Rechichi C, De Mojà G, Aragona P.	J Pediatr Ophthalmol Strabismus. 2017 Nov 1;54(6):346-355. doi: 10.3928/01913913-20170510-01. Epub 2017 Aug 29.	J Pediatr Ophthalmol Strabismus		2017			0.0409022		doi: 10.3928/01913913-20170510-01	28850642					0			0				0	0		doi: 10.3928/01913913-20170510-01	Rechichi C, De Mojà G, Aragona P., Video Game Vision Syndrome: A New Clinical Picture in Children? J Pediatr Ophthalmol Strabismus. 2017
10298	Treatment Guidelines for Rheumatologic Manifestations of Sjögren's Syndrome: Use of Biologic Agents, Management of Fatigue, and Inflammatory Musculoskeletal Pain.	Carsons SE, Vivino FB, Parke A, Carteron N, Sankar V, Brasington R, Brennan MT, Ehlers W, Fox R, Scofield H, Hammitt KM, Birnbaum J, Kassan S, Mandel S.	Arthritis Care Res (Hoboken). 2017 Apr;69(4):517-527. doi: 10.1002/acr.22968. Epub 2017 Mar 3. Review.	Arthritis Care Res (Hoboken)		2017			0.0409395		doi: 10.1002/acr.22968	27390247					0			0				0	0		doi: 10.1002/acr.22968	Carsons SE, Vivino FB, Parke A, Carteron N, Sankar V, Brasington R, Brennan MT, Ehlers W, Fox R, Scofield H, Hammitt KM, Birnbaum J, Kassan S, Mandel S., Treatment Guidelines for Rheumatologic Manifestations of Sjögren's Syndrome: Use of Biologic Agents, Management of Fatigue, and Inflammatory Musculoskeletal Pain. Arthritis Care Res (Hoboken). 2017
7190	Topical ocular treatment with monoclonal antibody Fab fragments targeting Japanese cedar pollen Cry j 1 inhibits Japanese cedar pollen-induced allergic conjunctivitis in mice.	Mizutani N, Nabe T, Yoshino S.	Eur J Pharmacol. 2017 Mar 5;798:105-112. doi: 10.1016/j.ejphar.2017.01.028. Epub 2017 Jan 21.	Eur J Pharmacol		2017			0.0410428		doi: 10.1016/j.ejphar.2017.01.028	28119075					0			0				0	0		doi: 10.1016/j.ejphar.2017.01.028	Mizutani N, Nabe T, Yoshino S., Topical ocular treatment with monoclonal antibody Fab fragments targeting Japanese cedar pollen Cry j 1 inhibits Japanese cedar pollen-induced allergic conjunctivitis in mice. Eur J Pharmacol. 2017
3320	Non-invasive objective and contemporary methods for measuring ocular surface inflammation in soft contact lens wearers - A review.	Chao C, Richdale K, Jalbert I, Doung K, Gokhale M.	Cont Lens Anterior Eye. 2017 Oct;40(5):273-282. doi: 10.1016/j.clae.2017.05.008. Epub 2017 Jun 9. Review.	Cont Lens Anterior Eye		2017			0.0411489		doi: 10.1016/j.clae.2017.05.008	28602547					0			0				0	0		doi: 10.1016/j.clae.2017.05.008	Chao C, Richdale K, Jalbert I, Doung K, Gokhale M., Non-invasive objective and contemporary methods for measuring ocular surface inflammation in soft contact lens wearers - A review. Cont Lens Anterior Eye. 2017
3001	The Classification and Prognosis of Periocular Complications Related to Blindness following Cosmetic Filler Injection.	Myung Y, Yim S, Jeong JH, Kim BK, Heo CY, Baek RM, Pak CS.	Plast Reconstr Surg. 2017 Jul;140(1):61-64. doi: 10.1097/PRS.0000000000003471.	Plast Reconstr Surg		2017			0.0411699		doi: 10.1097/PRS.0000000000003471	28654591					0			0				0	0		doi: 10.1097/PRS.0000000000003471	Myung Y, Yim S, Jeong JH, Kim BK, Heo CY, Baek RM, Pak CS., The Classification and Prognosis of Periocular Complications Related to Blindness following Cosmetic Filler Injection. Plast Reconstr Surg. 2017
6992	A de novo splice site mutation in CASK causes FG syndrome-4 and congenital nystagmus.	Dunn P, Prigatano GP, Szelinger S, Roth J, Siniard AL, Claasen AM, Richholt RF, De Both M, Corneveaux JJ, Moskowitz AM, Balak C, Piras IS, Russell M, Courtright AL, Belnap N, Rangasamy S, Ramsey K, Opitz JM, Craig DW, Narayanan V, Huentelman MJ, Schrauwen I.	Am J Med Genet A. 2017 Mar;173(3):611-617. doi: 10.1002/ajmg.a.38069. Epub 2017 Jan 31.	Am J Med Genet A		2017			0.0412976		doi: 10.1002/ajmg.a.38069	28139025					0			0				0	0		doi: 10.1002/ajmg.a.38069	Dunn P, Prigatano GP, Szelinger S, Roth J, Siniard AL, Claasen AM, Richholt RF, De Both M, Corneveaux JJ, Moskowitz AM, Balak C, Piras IS, Russell M, Courtright AL, Belnap N, Rangasamy S, Ramsey K, Opitz JM, Craig DW, Narayanan V, Huentelman MJ, Schrauwen I., A de novo splice site mutation in CASK causes FG syndrome-4 and congenital nystagmus. Am J Med Genet A. 2017
707	Hospital anxiety and depression scale assessment of 100 patients before and after using low vision care: A prospective study in a tertiary eye-care setting.	Rishi P, Rishi E, Maitray A, Agarwal A, Nair S, Gopalakrishnan S.	Indian J Ophthalmol. 2017 Nov;65(11):1203-1208. doi: 10.4103/ijo.IJO_436_17.	Indian J Ophthalmol		2017			0.0414412		doi: 10.4103/ijo.IJO_436_17	29133652					0			0				0	0		doi: 10.4103/ijo.IJO_436_17	Rishi P, Rishi E, Maitray A, Agarwal A, Nair S, Gopalakrishnan S., Hospital anxiety and depression scale assessment of 100 patients before and after using low vision care: A prospective study in a tertiary eye-care setting. Indian J Ophthalmol. 2017
932	Conjunctival Melanoma in Chinese Patients: Local Recurrence, Metastasis, Mortality, and Comparisons With Caucasian Patients.	Zhou C, Wang Y, Jia R, Fan X.	Invest Ophthalmol Vis Sci. 2017 Oct 1;58(12):5452-5459. doi: 10.1167/iovs.17-22376.	Invest Ophthalmol Vis Sci		2017			0.041514		doi: 10.1167/iovs.17-22376	29059312					0			0				0	0		doi: 10.1167/iovs.17-22376	Zhou C, Wang Y, Jia R, Fan X., Conjunctival Melanoma in Chinese Patients: Local Recurrence, Metastasis, Mortality, and Comparisons With Caucasian Patients. Invest Ophthalmol Vis Sci. 2017
5312	Enhanced Fasanella-Servat Procedure for the Graded Repair of Blepharoptosis.	North VS, Campbell AA, Callahan AB, Wilcsek G, Kazim M.	Ophthal Plast Reconstr Surg. 2017 Nov/Dec;33(6):474-476. doi: 10.1097/IOP.0000000000000890.	Ophthal Plast Reconstr Surg		2017			0.041945		doi: 10.1097/IOP.0000000000000890	28350692					0			0				0	0		doi: 10.1097/IOP.0000000000000890	North VS, Campbell AA, Callahan AB, Wilcsek G, Kazim M., Enhanced Fasanella-Servat Procedure for the Graded Repair of Blepharoptosis. Ophthal Plast Reconstr Surg. 2017
5259	Bacterial and Fungal Endophthalmitis.	Durand ML.	Clin Microbiol Rev. 2017 Jul;30(3):597-613. doi: 10.1128/CMR.00113-16. Review.	Clin Microbiol Rev		2017			0.0422363		doi: 10.1128/CMR.00113-16	28356323					0			0				0	0		doi: 10.1128/CMR.00113-16	Durand ML., Bacterial and Fungal Endophthalmitis. Clin Microbiol Rev. 2017
5745	Harlequin sign concomitant with Horner syndrome after anterior cervical discectomy: a case of intrusion into the cervical sympathetic system.	Fringeli Y, Humm AM, Ansorge A, Maestretti G.	J Neurosurg Spine. 2017 Jun;26(6):684-687. doi: 10.3171/2016.11.SPINE16711. Epub 2017 Mar 10.	J Neurosurg Spine		2017			0.0423704		doi: 10.3171/2016.11.SPINE16711	28291413					0			0				0	0		doi: 10.3171/2016.11.SPINE16711	Fringeli Y, Humm AM, Ansorge A, Maestretti G., Harlequin sign concomitant with Horner syndrome after anterior cervical discectomy: a case of intrusion into the cervical sympathetic system. J Neurosurg Spine. 2017
9074	Causes of suboptimal corrected visual acuity following phacoemulsification in a teaching university hospital.	Fathallah M, Eltanamly RM, Saadeldin H, Elnahry GH.	Eur J Ophthalmol. 2017 Mar 10;27(2):169-173. doi: 10.5301/ejo.5000824. Epub 2016 Jul 11.	Eur J Ophthalmol		2017			0.0425102		doi: 10.5301/ejo.5000824	27405282					0			0				0	0		doi: 10.5301/ejo.5000824	Fathallah M, Eltanamly RM, Saadeldin H, Elnahry GH., Causes of suboptimal corrected visual acuity following phacoemulsification in a teaching university hospital. Eur J Ophthalmol. 2017
725	Altered tear inflammatory profile in Indian keratoconus patients - The 2015 Col Rangachari Award paper.	Shetty R, Deshmukh R, Ghosh A, Sethu S, Jayadev C.	Indian J Ophthalmol. 2017 Nov;65(11):1105-1108. doi: 10.4103/ijo.IJO_233_17.	Indian J Ophthalmol		2017			0.042551		doi: 10.4103/ijo.IJO_233_17	29133633					0			0				0	0		doi: 10.4103/ijo.IJO_233_17	Shetty R, Deshmukh R, Ghosh A, Sethu S, Jayadev C., Altered tear inflammatory profile in Indian keratoconus patients - The 2015 Col Rangachari Award paper. Indian J Ophthalmol. 2017
155	Ocular Dipping in a Patient With Hemiplegic Migraine.	Gray IN, Cristancho AG, Licht DJ, Liu GT.	J Pediatr Ophthalmol Strabismus. 2018 Jan 31;55:e4-e6. doi: 10.3928/01913913-20171129-01.	J Pediatr Ophthalmol Strabismus		2018			0.0428596		doi: 10.3928/01913913-20171129-01	29384561					0			0				0	0		doi: 10.3928/01913913-20171129-01	Gray IN, Cristancho AG, Licht DJ, Liu GT., Ocular Dipping in a Patient With Hemiplegic Migraine. J Pediatr Ophthalmol Strabismus. 2018
3667	Association between Tumor Regression Rate and Gene Expression Profile after Iodine 125 Plaque Radiotherapy for Uveal Melanoma.	Mruthyunjaya P, Seider MI, Stinnett S, Schefler A; Ocular Oncology Study Consortium..	Ophthalmology. 2017 Oct;124(10):1532-1539. doi: 10.1016/j.ophtha.2017.04.013. Epub 2017 May 23.	Ophthalmology		2017			0.0429275		doi: 10.1016/j.ophtha.2017.04.013	28549517					0			0				0	0		doi: 10.1016/j.ophtha.2017.04.013	Mruthyunjaya P, Seider MI, Stinnett S, Schefler A; Ocular Oncology Study Consortium.., Association between Tumor Regression Rate and Gene Expression Profile after Iodine 125 Plaque Radiotherapy for Uveal Melanoma. Ophthalmology. 2017
6102	Effective cataract surgical coverage: An indicator for measuring quality-of-care in the context of Universal Health Coverage.	Ramke J, Gilbert CE, Lee AC, Ackland P, Limburg H, Foster A.	PLoS One. 2017 Mar 1;12(3):e0172342. doi: 10.1371/journal.pone.0172342. eCollection 2017.	PLoS One		2017			0.0429561		doi: 10.1371/journal.pone.0172342	28249047					0			0				0	0		doi: 10.1371/journal.pone.0172342	Ramke J, Gilbert CE, Lee AC, Ackland P, Limburg H, Foster A., Effective cataract surgical coverage: An indicator for measuring quality-of-care in the context of Universal Health Coverage. PLoS One. 2017
2240	Non-proliferative diabetic retinopathy symptoms detection and classification using neural network.	Al-Jarrah MA, Shatnawi H.	J Med Eng Technol. 2017 Aug;41(6):498-505. doi: 10.1080/03091902.2017.1358772. Epub 2017 Aug 8.	J Med Eng Technol		2017			0.0429617		doi: 10.1080/03091902.2017.1358772	28786703					0			0				0	0		doi: 10.1080/03091902.2017.1358772	Al-Jarrah MA, Shatnawi H., Non-proliferative diabetic retinopathy symptoms detection and classification using neural network. J Med Eng Technol. 2017
8487	Truncation of In Situ Baerveldt Glaucoma Drainage Device for Treatment of Late Persistent Postoperative Hypotony.	Chen PP.	J Glaucoma. 2017 Feb;26(2):e113-e114. doi: 10.1097/IJG.0000000000000601.	J Glaucoma		2017			0.0430168		doi: 10.1097/IJG.0000000000000601	27906813					0			0				0	0		doi: 10.1097/IJG.0000000000000601	Chen PP., Truncation of In Situ Baerveldt Glaucoma Drainage Device for Treatment of Late Persistent Postoperative Hypotony. J Glaucoma. 2017
9916	CHOROIDAL BLOOD FLOW VISUALIZATION IN HIGH MYOPIA USING A PROJECTION ARTIFACT METHOD IN OPTICAL COHERENCE TOMOGRAPHY ANGIOGRAPHY.	Maruko I, Spaide RF, Koizumi H, Sawaguchi S, Izumi T, Hasegawa T, Arakawa H, Iida T.	Retina. 2017 Mar;37(3):460-465. doi: 10.1097/IAE.0000000000001324.	Retina		2017			0.0432755		doi: 10.1097/IAE.0000000000001324	27541926					0			0				0	0		doi: 10.1097/IAE.0000000000001324	Maruko I, Spaide RF, Koizumi H, Sawaguchi S, Izumi T, Hasegawa T, Arakawa H, Iida T., CHOROIDAL BLOOD FLOW VISUALIZATION IN HIGH MYOPIA USING A PROJECTION ARTIFACT METHOD IN OPTICAL COHERENCE TOMOGRAPHY ANGIOGRAPHY. Retina. 2017
5098	Rapidly Developed Multiple Face and Neck Skin Cancers in a Patient with Sjögren's Syndrome: A Case Report.	Teh LS, Lai JC, Lian JC.	Am J Case Rep. 2017 Apr 4;18:347-350.	Am J Case Rep		2017			0.0433792		#VALUE!	28373638					0			0				0	0		#VALUE!	Teh LS, Lai JC, Lian JC., Rapidly Developed Multiple Face and Neck Skin Cancers in a Patient with Sjögren's Syndrome: A Case Report. Am J Case Rep. 2017
2527	Does bariatric surgery prevent progression of diabetic retinopathy?	Chen Y, Laybourne JP, Sandinha MT, de Alwis NMW, Avery P, Steel DH; Medscape..	Eye (Lond). 2017 Aug;31(8):1131-1139. doi: 10.1038/eye.2017.119. Epub 2017 Jul 21.	Eye (Lond)		2017			0.0434191		doi: 10.1038/eye.2017.119	28731054					0			0				0	0		doi: 10.1038/eye.2017.119	Chen Y, Laybourne JP, Sandinha MT, de Alwis NMW, Avery P, Steel DH; Medscape.., Does bariatric surgery prevent progression of diabetic retinopathy? Eye (Lond). 2017
9757	THE SECOND BLIND SPOT: SMALL RETINAL VESSEL VASCULOPATHY AFTER VACCINATION AGAINST NEISSERIA MENINGITIDIS AND YELLOW FEVER.	Moysidis SN, Koulisis N, Patel VR, Kashani AH, Rao NA, Humayun MS, Rodger DC.	Retin Cases Brief Rep. 2017 Winter;11 Suppl 1:S18-S23. doi: 10.1097/ICB.0000000000000391.	Retin Cases Brief Rep		2017			0.0435461		doi: 10.1097/ICB.0000000000000391	27599107					0			0				0	0		doi: 10.1097/ICB.0000000000000391	Moysidis SN, Koulisis N, Patel VR, Kashani AH, Rao NA, Humayun MS, Rodger DC., THE SECOND BLIND SPOT: SMALL RETINAL VESSEL VASCULOPATHY AFTER VACCINATION AGAINST NEISSERIA MENINGITIDIS AND YELLOW FEVER. Retin Cases Brief Rep. 2017
10870	Characteristics of Ocular Pain Complaints in Patients With Idiopathic Dry Eye Symptoms.	Kalangara JP, Galor A, Levitt RC, Covington DB, McManus KT, Sarantopoulos CD, Felix ER.	Eye Contact Lens. 2017 May;43(3):192-198. doi: 10.1097/ICL.0000000000000249.	Eye Contact Lens		2017			0.0435532		doi: 10.1097/ICL.0000000000000249	26925537					0			0				0	0		doi: 10.1097/ICL.0000000000000249	Kalangara JP, Galor A, Levitt RC, Covington DB, McManus KT, Sarantopoulos CD, Felix ER., Characteristics of Ocular Pain Complaints in Patients With Idiopathic Dry Eye Symptoms. Eye Contact Lens. 2017
10103	RANIBIZUMAB FOR MACULAR EDEMA AFTER BRANCH RETINAL VEIN OCCLUSION: One Initial Injection Versus Three Monthly Injections.	Miwa Y, Muraoka Y, Osaka R, Ooto S, Murakami T, Suzuma K, Takahashi A, Iida Y, Yoshimura N, Tsujikawa A.	Retina. 2017 Apr;37(4):702-709. doi: 10.1097/IAE.0000000000001224.	Retina		2017			0.0435896		doi: 10.1097/IAE.0000000000001224	27471827					0			0				0	0		doi: 10.1097/IAE.0000000000001224	Miwa Y, Muraoka Y, Osaka R, Ooto S, Murakami T, Suzuma K, Takahashi A, Iida Y, Yoshimura N, Tsujikawa A., RANIBIZUMAB FOR MACULAR EDEMA AFTER BRANCH RETINAL VEIN OCCLUSION: One Initial Injection Versus Three Monthly Injections. Retina. 2017
9338	Clinical evaluation and molecular screening of a large consecutive series of albino patients.	Mauri L, Manfredini E, Del Longo A, Veniani E, Scarcello M, Terrana R, Radaelli AE, Calò D, Mingoia G, Rossetti A, Marsico G, Mazza M, Gesu GP, Cristina Patrosso M, Penco S, Piozzi E, Primignani P.	J Hum Genet. 2017 Feb;62(2):277-290. doi: 10.1038/jhg.2016.123. Epub 2016 Oct 13.	J Hum Genet		2017			0.0436498		doi: 10.1038/jhg.2016.123	27734839					0			0				0	0		doi: 10.1038/jhg.2016.123	Mauri L, Manfredini E, Del Longo A, Veniani E, Scarcello M, Terrana R, Radaelli AE, Calò D, Mingoia G, Rossetti A, Marsico G, Mazza M, Gesu GP, Cristina Patrosso M, Penco S, Piozzi E, Primignani P., Clinical evaluation and molecular screening of a large consecutive series of albino patients. J Hum Genet. 2017
10577	Surgical Management of Double-Head Pterygium Using a Modified Split-Conjunctival Autograft Technique.	Duman F, Kosker M.	Semin Ophthalmol. 2017;32(5):569-574. doi: 10.3109/08820538.2015.1131836. Epub 2016 May 18.	Semin Ophthalmol		2017			0.0436951		doi: 10.3109/08820538.2015.1131836	27192101					0			0				0	0		doi: 10.3109/08820538.2015.1131836	Duman F, Kosker M., Surgical Management of Double-Head Pterygium Using a Modified Split-Conjunctival Autograft Technique. Semin Ophthalmol. 2017
6820	The Prognostic Value of AJCC Staging in Uveal Melanoma Is Enhanced by Adding Chromosome 3 and 8q Status.	Dogrusöz M, Bagger M, van Duinen SG, Kroes WG, Ruivenkamp CA, Böhringer S, Andersen KK, Luyten GP, Kiilgaard JF, Jager MJ.	Invest Ophthalmol Vis Sci. 2017 Feb 1;58(2):833-842. doi: 10.1167/iovs.16-20212.	Invest Ophthalmol Vis Sci		2017			0.0438564		doi: 10.1167/iovs.16-20212	28159971					0			0				0	0		doi: 10.1167/iovs.16-20212	Dogrusöz M, Bagger M, van Duinen SG, Kroes WG, Ruivenkamp CA, Böhringer S, Andersen KK, Luyten GP, Kiilgaard JF, Jager MJ., The Prognostic Value of AJCC Staging in Uveal Melanoma Is Enhanced by Adding Chromosome 3 and 8q Status. Invest Ophthalmol Vis Sci. 2017
8151	The clinical characteristics of AQP4 antibody positive NMO/SD in a large cohort of Chinese Han patients.	ZhangBao J, Zhou L, Li X, Cai T, Lu J, Lu C, Zhao C, Quan C.	J Neuroimmunol. 2017 Jan 15;302:49-55. doi: 10.1016/j.jneuroim.2016.11.010. Epub 2016 Dec 2.	J Neuroimmunol		2017			0.0439063		doi: 10.1016/j.jneuroim.2016.11.010	27988051					0			0				0	0		doi: 10.1016/j.jneuroim.2016.11.010	ZhangBao J, Zhou L, Li X, Cai T, Lu J, Lu C, Zhao C, Quan C., The clinical characteristics of AQP4 antibody positive NMO/SD in a large cohort of Chinese Han patients. J Neuroimmunol. 2017
3878	Imaging in tuberculosis-associated uveitis.	Bansal R, Basu S, Gupta A, Rao N, Invernizzi A, Kramer M.	Indian J Ophthalmol. 2017 Apr;65(4):264-270. doi: 10.4103/ijo.IJO_464_16. Review.	Indian J Ophthalmol		2017			0.0439238		doi: 10.4103/ijo.IJO_464_16	28513488					0			0				0	0		doi: 10.4103/ijo.IJO_464_16	Bansal R, Basu S, Gupta A, Rao N, Invernizzi A, Kramer M., Imaging in tuberculosis-associated uveitis. Indian J Ophthalmol. 2017
9867	Application of high resolution OCT to evaluate irregularity of Bowman's layer in asymmetric keratoconus.	Pahuja N, Shroff R, Pahanpate P, Francis M, Veeboy L, Shetty R, Nuijts RMMA, Sinha Roy A.	J Biophotonics. 2017 May;10(5):701-707. doi: 10.1002/jbio.201600106. Epub 2016 Aug 24.	J Biophotonics		2017			0.0440371		doi: 10.1002/jbio.201600106	27555452					0			0				0	0		doi: 10.1002/jbio.201600106	Pahuja N, Shroff R, Pahanpate P, Francis M, Veeboy L, Shetty R, Nuijts RMMA, Sinha Roy A., Application of high resolution OCT to evaluate irregularity of Bowman's layer in asymmetric keratoconus. J Biophotonics. 2017
9467	TREATMENT OF VITREOMACULAR TRACTION WITH INTRAVITREAL PERFLUOROPROPANE (C3F8) INJECTION.	Steinle NC, Dhoot DS, Quezada Ruiz C, Castellarin AA, Pieramici DJ, See RF, Couvillion SC, Nasir MA, Avery RL.	Retina. 2017 Apr;37(4):643-650. doi: 10.1097/IAE.0000000000001237.	Retina		2017			0.0440535		doi: 10.1097/IAE.0000000000001237	27681001					0			0				0	0		doi: 10.1097/IAE.0000000000001237	Steinle NC, Dhoot DS, Quezada Ruiz C, Castellarin AA, Pieramici DJ, See RF, Couvillion SC, Nasir MA, Avery RL., TREATMENT OF VITREOMACULAR TRACTION WITH INTRAVITREAL PERFLUOROPROPANE (C3F8) INJECTION. Retina. 2017
9000	Choriocapillaris Nonperfusion is Associated With Poor Visual Acuity in Eyes With Reticular Pseudodrusen.	Nesper PL, Soetikno BT, Fawzi AA.	Am J Ophthalmol. 2017 Feb;174:42-55. doi: 10.1016/j.ajo.2016.10.005. Epub 2016 Oct 26.	Am J Ophthalmol		2017			0.0440654		doi: 10.1016/j.ajo.2016.10.005	27794427					0			0				0	0		doi: 10.1016/j.ajo.2016.10.005	Nesper PL, Soetikno BT, Fawzi AA., Choriocapillaris Nonperfusion is Associated With Poor Visual Acuity in Eyes With Reticular Pseudodrusen. Am J Ophthalmol. 2017
4967	Age-related macular degeneration in a South Indian population, with and without diabetes.	Srinivasan S, Swaminathan G, Kulothungan V, Ganesan S, Sharma T, Raman R.	Eye (Lond). 2017 Aug;31(8):1176-1183. doi: 10.1038/eye.2017.47. Epub 2017 Apr 7.	Eye (Lond)		2017			0.0441178		doi: 10.1038/eye.2017.47	28387762					0			0				0	0		doi: 10.1038/eye.2017.47	Srinivasan S, Swaminathan G, Kulothungan V, Ganesan S, Sharma T, Raman R., Age-related macular degeneration in a South Indian population, with and without diabetes. Eye (Lond). 2017
2428	Autopsy findings in EPG5-related Vici syndrome with antenatal onset.	Touraine R, Laquerrière A, Petcu CA, Marguet F, Byrne S, Mein R, Yau S, Mohammed S, Guibaud L, Gautel M, Jungbluth H.	Am J Med Genet A. 2017 Sep;173(9):2522-2527. doi: 10.1002/ajmg.a.38342. Epub 2017 Jul 27.	Am J Med Genet A		2017			0.044135		doi: 10.1002/ajmg.a.38342	28748650					0			0				0	0		doi: 10.1002/ajmg.a.38342	Touraine R, Laquerrière A, Petcu CA, Marguet F, Byrne S, Mein R, Yau S, Mohammed S, Guibaud L, Gautel M, Jungbluth H., Autopsy findings in EPG5-related Vici syndrome with antenatal onset. Am J Med Genet A. 2017
2699	Accuracy of isolated-check visual evoked potential technique for diagnosing primary open-angle glaucoma.	Xu LJ, Zhang L, Li SL, Zemon V, Virgili G, Liang YB.	Doc Ophthalmol. 2017 Oct;135(2):107-119. doi: 10.1007/s10633-017-9598-6. Epub 2017 Jul 12.	Doc Ophthalmol		2017			0.0441368		doi: 10.1007/s10633-017-9598-6	28702796					0			0				0	0		doi: 10.1007/s10633-017-9598-6	Xu LJ, Zhang L, Li SL, Zemon V, Virgili G, Liang YB., Accuracy of isolated-check visual evoked potential technique for diagnosing primary open-angle glaucoma. Doc Ophthalmol. 2017
1028	Optical coherence tomography angiography of circumscribed choroidal hemangioma treated with photodynamic therapy.	Giudice GL, Galan A.	Indian J Ophthalmol. 2017 Oct;65(10):1049-1051. doi: 10.4103/ijo.IJO_237_17.	Indian J Ophthalmol		2017			0.0441643		doi: 10.4103/ijo.IJO_237_17	29044086					0			0				0	0		doi: 10.4103/ijo.IJO_237_17	Giudice GL, Galan A., Optical coherence tomography angiography of circumscribed choroidal hemangioma treated with photodynamic therapy. Indian J Ophthalmol. 2017
8783	The U-shaped relationship between fibroblast growth factor 21 and microvascular complication in type 2 diabetes mellitus.	Jung CH, Jung SH, Kim BY, Kim CH, Kang SK, Mok JO.	J Diabetes Complications. 2017 Jan;31(1):134-140. doi: 10.1016/j.jdiacomp.2016.10.017. Epub 2016 Oct 19.	J Diabetes Complications		2017			0.0442826		doi: 10.1016/j.jdiacomp.2016.10.017	27839924					0			0				0	0		doi: 10.1016/j.jdiacomp.2016.10.017	Jung CH, Jung SH, Kim BY, Kim CH, Kang SK, Mok JO., The U-shaped relationship between fibroblast growth factor 21 and microvascular complication in type 2 diabetes mellitus. J Diabetes Complications. 2017
3297	A Compact Whole-Eye Perfusion System to Evaluate Pharmacologic Responses of Outflow Facility.	Zhou EH, Paolucci M, Dryja TP, Manley T, Xiang C, Rice DS, Prasanna G, Chen A.	Invest Ophthalmol Vis Sci. 2017 Jun 1;58(7):2991-3003. doi: 10.1167/iovs.16-20974.	Invest Ophthalmol Vis Sci		2017			0.0442843		doi: 10.1167/iovs.16-20974	28605810					0			0				0	0		doi: 10.1167/iovs.16-20974	Zhou EH, Paolucci M, Dryja TP, Manley T, Xiang C, Rice DS, Prasanna G, Chen A., A Compact Whole-Eye Perfusion System to Evaluate Pharmacologic Responses of Outflow Facility. Invest Ophthalmol Vis Sci. 2017
8037	PROPORTION OF PATIENTS WITH MACULAR HOLE SURGERY WHO WOULD HAVE BEEN FAVORABLE OCRIPLASMIN CANDIDATES: A Retrospective Analysis.	Chaudhary K, Mak MY, Gizicki R, Muni RH, Wong DT, Altomare F, Berger AR.	Retina. 2017 Jan;37(1):76-79. doi: 10.1097/IAE.0000000000001143.	Retina		2017			0.0443424		doi: 10.1097/IAE.0000000000001143	28005718					0			0				0	0		doi: 10.1097/IAE.0000000000001143	Chaudhary K, Mak MY, Gizicki R, Muni RH, Wong DT, Altomare F, Berger AR., PROPORTION OF PATIENTS WITH MACULAR HOLE SURGERY WHO WOULD HAVE BEEN FAVORABLE OCRIPLASMIN CANDIDATES: A Retrospective Analysis. Retina. 2017
7132	Post-lens tear turbidity and visual quality after scleral lens wear.	Carracedo G, Serramito-Blanco M, Martin-Gil A, Wang Z, Rodriguez-Pomar C, Pintor J.	Clin Exp Optom. 2017 Nov;100(6):577-582. doi: 10.1111/cxo.12512. Epub 2017 Jan 26.	Clin Exp Optom		2017			0.044505		doi: 10.1111/cxo.12512	28125853					0			0				0	0		doi: 10.1111/cxo.12512	Carracedo G, Serramito-Blanco M, Martin-Gil A, Wang Z, Rodriguez-Pomar C, Pintor J., Post-lens tear turbidity and visual quality after scleral lens wear. Clin Exp Optom. 2017
559	The long-term outcomes of thyroid function after subtotal thyroidectomy for Graves' hyperthyroidism.	Lin YS, Lin JD, Hsu CC, Yu MC.	J Surg Res. 2017 Dec;220:112-118. doi: 10.1016/j.jss.2017.06.091. Epub 2017 Jul 26.	J Surg Res		2017			0.0446787		doi: 10.1016/j.jss.2017.06.091	29180171					0			0				0	0		doi: 10.1016/j.jss.2017.06.091	Lin YS, Lin JD, Hsu CC, Yu MC., The long-term outcomes of thyroid function after subtotal thyroidectomy for Graves' hyperthyroidism. J Surg Res. 2017
8911	Benchmarks for outcome indicators in pediatric cataract surgery.	Nihalani BR, VanderVeen DK.	Eye (Lond). 2017 Mar;31(3):417-421. doi: 10.1038/eye.2016.240. Epub 2016 Nov 4.	Eye (Lond)		2017			0.0447491		doi: 10.1038/eye.2016.240	27813517					0			0				0	0		doi: 10.1038/eye.2016.240	Nihalani BR, VanderVeen DK., Benchmarks for outcome indicators in pediatric cataract surgery. Eye (Lond). 2017
5019	The Boston keratoprosthesis.	Saeed HN, Shanbhag S, Chodosh J.	Curr Opin Ophthalmol. 2017 Jul;28(4):390-396. doi: 10.1097/ICU.0000000000000373. Review.	Curr Opin Ophthalmol		2017			0.0447583		doi: 10.1097/ICU.0000000000000373	28383302					0			0				0	0		doi: 10.1097/ICU.0000000000000373	Saeed HN, Shanbhag S, Chodosh J., The Boston keratoprosthesis. Curr Opin Ophthalmol. 2017
10362	Clinical and genetic characterization of a large primary open angle glaucoma pedigree.	Kader MA, Namburi P, Ramugade S, Ramakrishnan R, Krishnadas SR, Roos BR, Periasamy S, Robin AL, Fingert JH.	Ophthalmic Genet. 2017 May-Jun;38(3):222-225. doi: 10.1080/13816810.2016.1193883. Epub 2016 Jun 29.	Ophthalmic Genet		2017			0.0448934		doi: 10.1080/13816810.2016.1193883	27355837					0			0				0	0		doi: 10.1080/13816810.2016.1193883	Kader MA, Namburi P, Ramugade S, Ramakrishnan R, Krishnadas SR, Roos BR, Periasamy S, Robin AL, Fingert JH., Clinical and genetic characterization of a large primary open angle glaucoma pedigree. Ophthalmic Genet. 2017
8954	OCULAR HYPERTENSION AFTER INTRAVITREAL DEXAMETHASONE (OZURDEX) SUSTAINED-RELEASE IMPLANT.	Chin EK, Almeida DRP, Velez G, Xu K, Peraire M, Corbella M, Elshatory YM, Kwon YH, Gehrs KM, Boldt HC, Sohn EH, Russell SR, Folk JC, Mahajan VB.	Retina. 2017 Jul;37(7):1345-1351. doi: 10.1097/IAE.0000000000001364.	Retina		2017			0.0450209		doi: 10.1097/IAE.0000000000001364	27806001					0			0				0	0		doi: 10.1097/IAE.0000000000001364	Chin EK, Almeida DRP, Velez G, Xu K, Peraire M, Corbella M, Elshatory YM, Kwon YH, Gehrs KM, Boldt HC, Sohn EH, Russell SR, Folk JC, Mahajan VB., OCULAR HYPERTENSION AFTER INTRAVITREAL DEXAMETHASONE (OZURDEX) SUSTAINED-RELEASE IMPLANT. Retina. 2017
8768	Changes in intraocular pressure and tear secretion in patients given 5 mg solifenacin for the treatment of overactive bladder.	Turkoglu AR, Yener NP, Coban S, Guzelsoy M, Demirbas M, Demirci H.	Int Urogynecol J. 2017 May;28(5):777-781. doi: 10.1007/s00192-016-3199-x. Epub 2016 Nov 14.	Int Urogynecol J		2017			0.045035		doi: 10.1007/s00192-016-3199-x	27844122					0			0				0	0		doi: 10.1007/s00192-016-3199-x	Turkoglu AR, Yener NP, Coban S, Guzelsoy M, Demirbas M, Demirci H., Changes in intraocular pressure and tear secretion in patients given 5 mg solifenacin for the treatment of overactive bladder. Int Urogynecol J. 2017
8127	Corneal epithelial bullae after short-term wear of small diameter scleral lenses.	Nixon AD, Barr JT, VanNasdale DA.	Cont Lens Anterior Eye. 2017 Apr;40(2):116-126. doi: 10.1016/j.clae.2016.11.007. Epub 2016 Dec 16.	Cont Lens Anterior Eye		2017			0.0450489		doi: 10.1016/j.clae.2016.11.007	27993459					0			0				0	0		doi: 10.1016/j.clae.2016.11.007	Nixon AD, Barr JT, VanNasdale DA., Corneal epithelial bullae after short-term wear of small diameter scleral lenses. Cont Lens Anterior Eye. 2017
4544	Clinical Outcome After Extended Endoscopic Endonasal Resection of Craniopharyngiomas: Two-Institution Experience.	Park HR, Kshettry VR, Farrell CJ, Lee JM, Kim YH, Won TB, Han DH, Do H, Nyguist G, Rosen M, Kim DG, Evans JJ, Paek SH.	World Neurosurg. 2017 Jul;103:465-474. doi: 10.1016/j.wneu.2017.04.047. Epub 2017 Apr 19.	World Neurosurg		2017			0.0451143		doi: 10.1016/j.wneu.2017.04.047	28433845					0			0				0	0		doi: 10.1016/j.wneu.2017.04.047	Park HR, Kshettry VR, Farrell CJ, Lee JM, Kim YH, Won TB, Han DH, Do H, Nyguist G, Rosen M, Kim DG, Evans JJ, Paek SH., Clinical Outcome After Extended Endoscopic Endonasal Resection of Craniopharyngiomas: Two-Institution Experience. World Neurosurg. 2017
10623	Central corneal thickness and corneal curvature in patients with rheumatoid arthritis.	Özcura F, Aktaş S, Özkan Y, Tetikoğlu M, Sağdik HM.	Int Ophthalmol. 2017 Feb;37(1):159-163. doi: 10.1007/s10792-016-0243-2. Epub 2016 May 9.	Int Ophthalmol		2017			0.04535		doi: 10.1007/s10792-016-0243-2	27160271					0			0				0	0		doi: 10.1007/s10792-016-0243-2	Özcura F, Aktaş S, Özkan Y, Tetikoğlu M, Sağdik HM., Central corneal thickness and corneal curvature in patients with rheumatoid arthritis. Int Ophthalmol. 2017
974	Factors associated with vision-related quality of life among the adult population living in Nagorno Karabagh.	Harutyunyan T, Giloyan A, Petrosyan V.	Public Health. 2017 Dec;153:137-146. doi: 10.1016/j.puhe.2017.09.004. Epub 2017 Oct 16.	Public Health		2017			0.0453515		doi: 10.1016/j.puhe.2017.09.004	29049920					0			0				0	0		doi: 10.1016/j.puhe.2017.09.004	Harutyunyan T, Giloyan A, Petrosyan V., Factors associated with vision-related quality of life among the adult population living in Nagorno Karabagh. Public Health. 2017
1777	Absence of Sigma 1 Receptor Accelerates Photoreceptor Cell Death in a Murine Model of Retinitis Pigmentosa.	Wang J, Saul A, Cui X, Roon P, Smith SB.	Invest Ophthalmol Vis Sci. 2017 Sep 1;58(11):4545-4558. doi: 10.1167/iovs.17-21947.	Invest Ophthalmol Vis Sci		2017			0.0454398		doi: 10.1167/iovs.17-21947	28877319					0			0				0	0		doi: 10.1167/iovs.17-21947	Wang J, Saul A, Cui X, Roon P, Smith SB., Absence of Sigma 1 Receptor Accelerates Photoreceptor Cell Death in a Murine Model of Retinitis Pigmentosa. Invest Ophthalmol Vis Sci. 2017
1347	Orbital complications of paranasal sinusitis in Taiwan, 1988 through 2015: Acute ophthalmological manifestations, diagnosis, and management.	Chang YS, Chen PL, Hung JH, Chen HY, Lai CC, Ou CY, Chang CM, Wang CK, Cheng HC, Tseng SH.	PLoS One. 2017 Oct 3;12(10):e0184477. doi: 10.1371/journal.pone.0184477. eCollection 2017.	PLoS One		2017			0.0454675		doi: 10.1371/journal.pone.0184477	28972988					0			0				0	0		doi: 10.1371/journal.pone.0184477	Chang YS, Chen PL, Hung JH, Chen HY, Lai CC, Ou CY, Chang CM, Wang CK, Cheng HC, Tseng SH., Orbital complications of paranasal sinusitis in Taiwan, 1988 through 2015: Acute ophthalmological manifestations, diagnosis, and management. PLoS One. 2017
10794	Bilateral macular holes and a new onset vitelliform lesion in Best disease.	Liu J, Xuan Y, Zhang Y, Liu W, Xu G.	Ophthalmic Genet. 2017 Jan-Feb;38(1):79-82. doi: 10.3109/13816810.2015.1126614. Epub 2016 Mar 31.	Ophthalmic Genet		2017			0.0456761		doi: 10.3109/13816810.2015.1126614	27031371					0			0				0	0		doi: 10.3109/13816810.2015.1126614	Liu J, Xuan Y, Zhang Y, Liu W, Xu G., Bilateral macular holes and a new onset vitelliform lesion in Best disease. Ophthalmic Genet. 2017
651	Occupational exposure to unburnt tobacco and potential risk of toxic optic neuropathy: A cross-sectional study among beedi rollers in selected rural areas of coastal Karnataka, India.	Kaup S, Naseer A, Shivalli S, Arunachalam C.	PLoS One. 2017 Nov 17;12(11):e0188378. doi: 10.1371/journal.pone.0188378. eCollection 2017.	PLoS One		2017			0.0459299		doi: 10.1371/journal.pone.0188378	29149211					0			0				0	0		doi: 10.1371/journal.pone.0188378	Kaup S, Naseer A, Shivalli S, Arunachalam C., Occupational exposure to unburnt tobacco and potential risk of toxic optic neuropathy: A cross-sectional study among beedi rollers in selected rural areas of coastal Karnataka, India. PLoS One. 2017
8230	Translaminar pressure in Caucasian normal tension glaucoma patients.	Pircher A, Remonda L, Weinreb RN, Killer HE.	Acta Ophthalmol. 2017 Nov;95(7):e524-e531. doi: 10.1111/aos.13302. Epub 2016 Dec 14.	Acta Ophthalmol		2017			0.0459334		doi: 10.1111/aos.13302	27966838					0			0				0	0		doi: 10.1111/aos.13302	Pircher A, Remonda L, Weinreb RN, Killer HE., Translaminar pressure in Caucasian normal tension glaucoma patients. Acta Ophthalmol. 2017
6651	Treatment by rituximab on six Grave's ophthalmopathies resistant to corticosteroids.	Précausta F, Arsène S, Renoult-Pierre P, Laure B, Crinière L, Pisella PJ.	Ann Endocrinol (Paris). 2017 Feb;78(1):20-26. doi: 10.1016/j.ando.2016.12.002. Epub 2017 Feb 6.	Ann Endocrinol (Paris)		2017			0.0459571		doi: 10.1016/j.ando.2016.12.002	28185649					0			0				0	0		doi: 10.1016/j.ando.2016.12.002	Précausta F, Arsène S, Renoult-Pierre P, Laure B, Crinière L, Pisella PJ., Treatment by rituximab on six Grave's ophthalmopathies resistant to corticosteroids. Ann Endocrinol (Paris). 2017
9660	Vascular abnormalities in patients with Stargardt disease assessed with optical coherence tomography angiography.	Battaglia Parodi M, Cicinelli MV, Rabiolo A, Pierro L, Bolognesi G, Bandello F.	Br J Ophthalmol. 2017 Jun;101(6):780-785. doi: 10.1136/bjophthalmol-2016-308869. Epub 2016 Sep 14.	Br J Ophthalmol		2017			0.0459616		doi: 10.1136/bjophthalmol-2016-308869	27628426					0			0				0	0		doi: 10.1136/bjophthalmol-2016-308869	Battaglia Parodi M, Cicinelli MV, Rabiolo A, Pierro L, Bolognesi G, Bandello F., Vascular abnormalities in patients with Stargardt disease assessed with optical coherence tomography angiography. Br J Ophthalmol. 2017
8769	A 63-Year-Old Man With Progressive Visual Symptoms.	Mitchell SB, Lucente D, Larvie M, Cobos MI, Frosch M, Dickerson BC.	JAMA Neurol. 2017 Jan 1;74(1):114-118. doi: 10.1001/jamaneurol.2016.2210.	JAMA Neurol		2017			0.0462211		doi: 10.1001/jamaneurol.2016.2210	27842190					0			0				0	0		doi: 10.1001/jamaneurol.2016.2210	Mitchell SB, Lucente D, Larvie M, Cobos MI, Frosch M, Dickerson BC., A 63-Year-Old Man With Progressive Visual Symptoms. JAMA Neurol. 2017
612	The Antibiofilm efficacy of nitric oxide on soft contact lenses.	Kim DJ, Park JH, Kim M, Park CY.	BMC Ophthalmol. 2017 Nov 21;17(1):206. doi: 10.1186/s12886-017-0604-2.	BMC Ophthalmol		2017			0.0463334		doi: 10.1186/s12886-017-0604-2	29162075					0			0				0	0		doi: 10.1186/s12886-017-0604-2	Kim DJ, Park JH, Kim M, Park CY., The Antibiofilm efficacy of nitric oxide on soft contact lenses. BMC Ophthalmol. 2017
2126	Local synthesis of sex hormones: are there consequences for the ocular surface and dry eye?	Gibson EJ, Stapleton F, Wolffsohn JS, Golebiowski B.	Br J Ophthalmol. 2017 Dec;101(12):1596-1603. doi: 10.1136/bjophthalmol-2017-310610. Epub 2017 Aug 16. Review.	Br J Ophthalmol		2017			0.0463335		doi: 10.1136/bjophthalmol-2017-310610	28814411					0			0				0	0		doi: 10.1136/bjophthalmol-2017-310610	Gibson EJ, Stapleton F, Wolffsohn JS, Golebiowski B., Local synthesis of sex hormones: are there consequences for the ocular surface and dry eye? Br J Ophthalmol. 2017
9084	Laser peripheral iridotomy changes anterior chamber architecture.	Theinert C, Wiedemann P, Unterlauft JD.	Eur J Ophthalmol. 2017 Jan 19;27(1):49-54. doi: 10.5301/ejo.5000804. Epub 2016 May 16.	Eur J Ophthalmol		2017			0.0464663		doi: 10.5301/ejo.5000804	27198636					0			0				0	0		doi: 10.5301/ejo.5000804	Theinert C, Wiedemann P, Unterlauft JD., Laser peripheral iridotomy changes anterior chamber architecture. Eur J Ophthalmol. 2017
4617	Emerging Simplified Retinal Imaging.	Sharma A.	Dev Ophthalmol. 2017;60:56-62. doi: 10.1159/000459690. Epub 2017 Apr 20. Review.	Dev Ophthalmol		2017			0.0464841		doi: 10.1159/000459690	28427065					0			0				0	0		doi: 10.1159/000459690	Sharma A., Emerging Simplified Retinal Imaging. Dev Ophthalmol. 2017
10397	Significance of Interleukin-6/STAT Pathway for the Gene Expression of REG Iα, a New Autoantigen in Sjögren's Syndrome Patients, in Salivary Duct Epithelial Cells.	Fujimura T, Fujimoto T, Itaya-Hironaka A, Miyaoka T, Yoshimoto K, Sakuramoto-Tsuchida S, Yamauchi A, Takeda M, Tsujinaka H, Tanaka Y, Takasawa S.	Clin Rev Allergy Immunol. 2017 Jun;52(3):351-363. doi: 10.1007/s12016-016-8570-7. Review.	Clin Rev Allergy Immunol		2017			0.0466346		doi: 10.1007/s12016-016-8570-7	27339601					0			0				0	0		doi: 10.1007/s12016-016-8570-7	Fujimura T, Fujimoto T, Itaya-Hironaka A, Miyaoka T, Yoshimoto K, Sakuramoto-Tsuchida S, Yamauchi A, Takeda M, Tsujinaka H, Tanaka Y, Takasawa S., Significance of Interleukin-6/STAT Pathway for the Gene Expression of REG Iα, a New Autoantigen in Sjögren's Syndrome Patients, in Salivary Duct Epithelial Cells. Clin Rev Allergy Immunol. 2017
10222	Parents' awareness and perception of children's eye diseases in Nigeria.	Ebeigbe JA, Emedike CM.	J Optom. 2017 Apr - Jun;10(2):104-110. doi: 10.1016/j.optom.2016.06.001. Epub 2016 Jul 14.	J Optom		2017			0.0466762		doi: 10.1016/j.optom.2016.06.001	27423689					0			0				0	0		doi: 10.1016/j.optom.2016.06.001	Ebeigbe JA, Emedike CM., Parents' awareness and perception of children's eye diseases in Nigeria. J Optom. 2017
2521	Peripheral Endothelial Cell Count Is a Predictor of Disease Severity in Advanced Fuchs Endothelial Corneal Dystrophy.	Syed ZA, Tran JA, Jurkunas UV.	Cornea. 2017 Oct;36(10):1166-1171. doi: 10.1097/ICO.0000000000001292.	Cornea		2017			0.0467404		doi: 10.1097/ICO.0000000000001292	28731879					0			0				0	0		doi: 10.1097/ICO.0000000000001292	Syed ZA, Tran JA, Jurkunas UV., Peripheral Endothelial Cell Count Is a Predictor of Disease Severity in Advanced Fuchs Endothelial Corneal Dystrophy. Cornea. 2017
3576	Asymmetry of Preoperative Incision Design Markings for Upper Blepharoplasty.	Yi MY, Choi HS, Jang JW, Kim SJ, Jang SY.	J Craniofac Surg. 2017 Jul;28(5):e419-e422. doi: 10.1097/SCS.0000000000003654.	J Craniofac Surg		2017			0.0467808		doi: 10.1097/SCS.0000000000003654	28570401					0			0				0	0		doi: 10.1097/SCS.0000000000003654	Yi MY, Choi HS, Jang JW, Kim SJ, Jang SY., Asymmetry of Preoperative Incision Design Markings for Upper Blepharoplasty. J Craniofac Surg. 2017
9568	Diagnostic and Therapeutic Challenges.	Uyhazi KE, Tamhankar MA, Liu GT, Brucker AJ, Kim BJ, Sheyman A, Fawzi AA.	Retina. 2017 Jun;37(6):1209-1214. doi: 10.1097/IAE.0000000000001306. No abstract available.	Retina		2017			0.0467951		doi: 10.1097/IAE.0000000000001306	27658285					0			0				0	0		doi: 10.1097/IAE.0000000000001306	Uyhazi KE, Tamhankar MA, Liu GT, Brucker AJ, Kim BJ, Sheyman A, Fawzi AA., Diagnostic and Therapeutic Challenges. Retina. 2017
8659	Differential diagnosis of IgG4-related sialadenitis, primary Sjögren syndrome, and chronic obstructive submandibular sialadenitis.	Hong X, Li W, Xie XY, Zhang ZY, Chen Y, Gao Y, Peng X, Su JZ, Zhang YY, Wang Z, Cai ZG, Zhang L, Liu YY, He J, Ren LM, Li ZG, Yu GY.	Br J Oral Maxillofac Surg. 2017 Feb;55(2):179-184. doi: 10.1016/j.bjoms.2016.10.021. Epub 2016 Nov 17.	Br J Oral Maxillofac Surg		2017			0.0468136		doi: 10.1016/j.bjoms.2016.10.021	27866757					0			0				0	0		doi: 10.1016/j.bjoms.2016.10.021	Hong X, Li W, Xie XY, Zhang ZY, Chen Y, Gao Y, Peng X, Su JZ, Zhang YY, Wang Z, Cai ZG, Zhang L, Liu YY, He J, Ren LM, Li ZG, Yu GY., Differential diagnosis of IgG4-related sialadenitis, primary Sjögren syndrome, and chronic obstructive submandibular sialadenitis. Br J Oral Maxillofac Surg. 2017
9044	Symptomatic treatment of pollen-related allergic rhinoconjunctivitis in children: randomized controlled trial.	Wartna JB, Bohnen AM, Elshout G, Pijnenburg MW, Pols DH, Gerth van Wijk RR, Bindels PJ.	Allergy. 2017 Apr;72(4):636-644. doi: 10.1111/all.13056. Epub 2016 Oct 28.	Allergy		2017			0.0468287		doi: 10.1111/all.13056	27696447					0			0				0	0		doi: 10.1111/all.13056	Wartna JB, Bohnen AM, Elshout G, Pijnenburg MW, Pols DH, Gerth van Wijk RR, Bindels PJ., Symptomatic treatment of pollen-related allergic rhinoconjunctivitis in children: randomized controlled trial. Allergy. 2017
3619	Suture of Symptomatic YAG Laser Peripheral Iridotomies Following Phakic Intraocular Lens Implantation.	Tognetto D, De Giacinto C, Cirigliano G.	J Glaucoma. 2017 Jul;26(7):675-677. doi: 10.1097/IJG.0000000000000688.	J Glaucoma		2017			0.0469569		doi: 10.1097/IJG.0000000000000688	28557825					0			0				0	0		doi: 10.1097/IJG.0000000000000688	Tognetto D, De Giacinto C, Cirigliano G., Suture of Symptomatic YAG Laser Peripheral Iridotomies Following Phakic Intraocular Lens Implantation. J Glaucoma. 2017
6587	Topography-Guided PRK and Crosslinking in Eyes with Keratoconus and Post-LASIK Ectasia.	Müller TM, Lange AP.	Klin Monbl Augenheilkd. 2017 Apr;234(4):451-454. doi: 10.1055/s-0042-123516. Epub 2017 Feb 13.	Klin Monbl Augenheilkd		2017			0.0469815		doi: 10.1055/s-0042-123516	28192838					0			0				0	0		doi: 10.1055/s-0042-123516	Müller TM, Lange AP., Topography-Guided PRK and Crosslinking in Eyes with Keratoconus and Post-LASIK Ectasia. Klin Monbl Augenheilkd. 2017
5128	REEP6 mediates trafficking of a subset of Clathrin-coated vesicles and is critical for rod photoreceptor function and survival.	Veleri S, Nellissery J, Mishra B, Manjunath SH, Brooks MJ, Dong L, Nagashima K, Qian H, Gao C, Sergeev YV, Huang XF, Qu J, Lu F, Cideciyan AV, Li T, Jin ZB, Fariss RN, Ratnapriya R, Jacobson SG, Swaroop A.	Hum Mol Genet. 2017 Jun 15;26(12):2218-2230. doi: 10.1093/hmg/ddx111.	Hum Mol Genet		2017			0.0470701		doi: 10.1093/hmg/ddx111	28369466					0			0				0	0		doi: 10.1093/hmg/ddx111	Veleri S, Nellissery J, Mishra B, Manjunath SH, Brooks MJ, Dong L, Nagashima K, Qian H, Gao C, Sergeev YV, Huang XF, Qu J, Lu F, Cideciyan AV, Li T, Jin ZB, Fariss RN, Ratnapriya R, Jacobson SG, Swaroop A., REEP6 mediates trafficking of a subset of Clathrin-coated vesicles and is critical for rod photoreceptor function and survival. Hum Mol Genet. 2017
8939	Common phenotype and different non-HLA genes in Graves' disease and alopecia areata.	Taketomo Y, Noso S, Babaya N, Hiromine Y, Ito H, Kanto K, Niwano F, Oiso N, Kawada A, Kawabata Y, Ikegami H.	Hum Immunol. 2017 Feb;78(2):185-189. doi: 10.1016/j.humimm.2016.10.019. Epub 2016 Oct 31.	Hum Immunol		2017			0.0471083		doi: 10.1016/j.humimm.2016.10.019	27810496					0			0				0	0		doi: 10.1016/j.humimm.2016.10.019	Taketomo Y, Noso S, Babaya N, Hiromine Y, Ito H, Kanto K, Niwano F, Oiso N, Kawada A, Kawabata Y, Ikegami H., Common phenotype and different non-HLA genes in Graves' disease and alopecia areata. Hum Immunol. 2017
1694	Multicenter, Randomized Clinical Trial to Assess the Effectiveness of Intravitreal Injections of Bevacizumab, Triamcinolone, or Their Combination in the Treatment of Diabetic Macular Edema.	Neto HO, Regatieri CV, Nobrega MJ, Muccioli C, Casella AM, Andrade RE, Maia M, Kniggendorf V, Ferreira M, Branco AC, Belfort R Jr.	Ophthalmic Surg Lasers Imaging Retina. 2017 Sep 1;48(9):734-740. doi: 10.3928/23258160-20170829-08.	Ophthalmic Surg Lasers Imaging Retina		2017			0.0471127		doi: 10.3928/23258160-20170829-08	28902334					0			0				0	0		doi: 10.3928/23258160-20170829-08	Neto HO, Regatieri CV, Nobrega MJ, Muccioli C, Casella AM, Andrade RE, Maia M, Kniggendorf V, Ferreira M, Branco AC, Belfort R Jr., Multicenter, Randomized Clinical Trial to Assess the Effectiveness of Intravitreal Injections of Bevacizumab, Triamcinolone, or Their Combination in the Treatment of Diabetic Macular Edema. Ophthalmic Surg Lasers Imaging Retina. 2017
9697	SERUM LEVELS OF VASCULAR ENDOTHELIAL GROWTH FACTOR BEFORE AND AFTER INTRAVITREAL INJECTION OF RANIBIZUMAB OR CONBERCEPT FOR NEOVASCULAR AGE-RELATED MACULAR DEGENERATION.	Jin E, Bai Y, Luo L, Huang L, Zhu X, Ding X, Qi H, Zhao M.	Retina. 2017 May;37(5):971-977. doi: 10.1097/IAE.0000000000001274.	Retina		2017			0.0471704		doi: 10.1097/IAE.0000000000001274	27617537					0			0				0	0		doi: 10.1097/IAE.0000000000001274	Jin E, Bai Y, Luo L, Huang L, Zhu X, Ding X, Qi H, Zhao M., SERUM LEVELS OF VASCULAR ENDOTHELIAL GROWTH FACTOR BEFORE AND AFTER INTRAVITREAL INJECTION OF RANIBIZUMAB OR CONBERCEPT FOR NEOVASCULAR AGE-RELATED MACULAR DEGENERATION. Retina. 2017
8949	Human bone marrow mesenchymal stem cells for retinal vascular injury.	Wang JD, An Y, Zhang JS, Wan XH, Jonas JB, Xu L, Zhang W.	Acta Ophthalmol. 2017 Sep;95(6):e453-e461. doi: 10.1111/aos.13154. Epub 2016 Nov 3.	Acta Ophthalmol		2017			0.0472104		doi: 10.1111/aos.13154	27807930					0			0				0	0		doi: 10.1111/aos.13154	Wang JD, An Y, Zhang JS, Wan XH, Jonas JB, Xu L, Zhang W., Human bone marrow mesenchymal stem cells for retinal vascular injury. Acta Ophthalmol. 2017
10930	Correlation of Clinical Outcomes with Quantitative Polymerase Chain Reaction DNA Copy Number in Patients with Acute Retinal Necrosis.	Calvo CM, Khan MA, Mehta S, Garg SJ, Dunn JP.	Ocul Immunol Inflamm. 2017 Apr;25(2):246-252. doi: 10.3109/09273948.2015.1115081. Epub 2016 Jan 30.	Ocul Immunol Inflamm		2017			0.0472885		doi: 10.3109/09273948.2015.1115081	26828388					0			0				0	0		doi: 10.3109/09273948.2015.1115081	Calvo CM, Khan MA, Mehta S, Garg SJ, Dunn JP., Correlation of Clinical Outcomes with Quantitative Polymerase Chain Reaction DNA Copy Number in Patients with Acute Retinal Necrosis. Ocul Immunol Inflamm. 2017
9736	Comparisons of focal macular electroretinograms after indocyanine green-, brilliant blue G-, or triamcinolone acetonide-assisted macular hole surgery.	Machida S, Nishimura T, Ohzeki T, Murai KI, Kurosaka D.	Graefes Arch Clin Exp Ophthalmol. 2017 Mar;255(3):485-492. doi: 10.1007/s00417-016-3478-8. Epub 2016 Sep 7.	Graefes Arch Clin Exp Ophthalmol		2017			0.0472987		doi: 10.1007/s00417-016-3478-8	27604762					0			0				0	0		doi: 10.1007/s00417-016-3478-8	Machida S, Nishimura T, Ohzeki T, Murai KI, Kurosaka D., Comparisons of focal macular electroretinograms after indocyanine green-, brilliant blue G-, or triamcinolone acetonide-assisted macular hole surgery. Graefes Arch Clin Exp Ophthalmol. 2017
503	AAV-CRISPR/Cas9-Mediated Depletion of VEGFR2 Blocks Angiogenesis In Vitro.	Wu W, Duan Y, Ma G, Zhou G, Park-Windhol C, D'Amore PA, Lei H.	Invest Ophthalmol Vis Sci. 2017 Dec 1;58(14):6082-6090. doi: 10.1167/iovs.17-21902.	Invest Ophthalmol Vis Sci		2017			0.047427		doi: 10.1167/iovs.17-21902	29204648					0			0				0	0		doi: 10.1167/iovs.17-21902	Wu W, Duan Y, Ma G, Zhou G, Park-Windhol C, D'Amore PA, Lei H., AAV-CRISPR/Cas9-Mediated Depletion of VEGFR2 Blocks Angiogenesis In Vitro. Invest Ophthalmol Vis Sci. 2017
10061	Testing vision with angular and radial multifocal designs using Adaptive Optics.	Vinas M, Dorronsoro C, Gonzalez V, Cortes D, Radhakrishnan A, Marcos S.	Vision Res. 2017 Mar;132:85-96. doi: 10.1016/j.visres.2016.04.011. Epub 2016 Aug 2.	Vision Res		2017			0.0475117		doi: 10.1016/j.visres.2016.04.011	27484778					0			0				0	0		doi: 10.1016/j.visres.2016.04.011	Vinas M, Dorronsoro C, Gonzalez V, Cortes D, Radhakrishnan A, Marcos S., Testing vision with angular and radial multifocal designs using Adaptive Optics. Vision Res. 2017
787	Myeloid differentiation protein 2 induced retinal ischemia reperfusion injury via upregulation of ROS through a TLR4-NOX4 pathway.	Chen H, Song Z, Ying S, Yang X, Wu W, Tan Q, Ju X, Wu W, Zhang X, Qu J, Wang Y.	Toxicol Lett. 2018 Jan 5;282:109-120. doi: 10.1016/j.toxlet.2017.10.018. Epub 2017 Oct 27.	Toxicol Lett		2018			0.0475872		doi: 10.1016/j.toxlet.2017.10.018	29111459					0			0				0	0		doi: 10.1016/j.toxlet.2017.10.018	Chen H, Song Z, Ying S, Yang X, Wu W, Tan Q, Ju X, Wu W, Zhang X, Qu J, Wang Y., Myeloid differentiation protein 2 induced retinal ischemia reperfusion injury via upregulation of ROS through a TLR4-NOX4 pathway. Toxicol Lett. 2018
10906	IgG4-Related Disease of the Punctum and Canaliculus.	Silverman N, Lanjewar S, Gupta R, Shinder R.	Ophthal Plast Reconstr Surg. 2017 May/Jun;33(3S Suppl 1):S165-S167. doi: 10.1097/IOP.0000000000000642.	Ophthal Plast Reconstr Surg		2017			0.0476067		doi: 10.1097/IOP.0000000000000642	26866331					0			0				0	0		doi: 10.1097/IOP.0000000000000642	Silverman N, Lanjewar S, Gupta R, Shinder R., IgG4-Related Disease of the Punctum and Canaliculus. Ophthal Plast Reconstr Surg. 2017
5017	The association between periodontal disease and age-related macular degeneration in the Korea National health and nutrition examination survey: A cross-sectional observational study.	Shin YU, Lim HW, Hong EH, Kang MH, Seong M, Nam E, Cho H.	Medicine (Baltimore). 2017 Apr;96(14):e6418. doi: 10.1097/MD.0000000000006418.	Medicine (Baltimore)		2017			0.0477548		doi: 10.1097/MD.0000000000006418	28383406					0			0				0	0		doi: 10.1097/MD.0000000000006418	Shin YU, Lim HW, Hong EH, Kang MH, Seong M, Nam E, Cho H., The association between periodontal disease and age-related macular degeneration in the Korea National health and nutrition examination survey: A cross-sectional observational study. Medicine (Baltimore). 2017
4489	Evaluation of meibomian gland and tear film changes in patients with pterygium.	Ye F, Zhou F, Xia Y, Zhu X, Wu Y, Huang Z.	Indian J Ophthalmol. 2017 Mar;65(3):233-237. doi: 10.4103/ijo.IJO_743_16.	Indian J Ophthalmol		2017			0.0478785		doi: 10.4103/ijo.IJO_743_16	28440253					0			0				0	0		doi: 10.4103/ijo.IJO_743_16	Ye F, Zhou F, Xia Y, Zhu X, Wu Y, Huang Z., Evaluation of meibomian gland and tear film changes in patients with pterygium. Indian J Ophthalmol. 2017
6524	Therapeutic Options in Refractory Diabetic Macular Oedema.	Shah SU, Maturi RK.	Drugs. 2017 Apr;77(5):481-492. doi: 10.1007/s40265-017-0704-6. Review.	Drugs		2017			0.0479863		doi: 10.1007/s40265-017-0704-6	28197794					0			0				0	0		doi: 10.1007/s40265-017-0704-6	Shah SU, Maturi RK., Therapeutic Options in Refractory Diabetic Macular Oedema. Drugs. 2017
8266	Neuroprotection for glaucoma: Requirements for clinical translation.	Levin LA, Crowe ME, Quigley HA; Lasker/IRRF Initiative on Astrocytes and Glaucomatous Neurodegeneration Participants..	Exp Eye Res. 2017 Apr;157:34-37. doi: 10.1016/j.exer.2016.12.005. Epub 2016 Dec 9. Review.	Exp Eye Res		2017			0.0480101		doi: 10.1016/j.exer.2016.12.005	27955999					0			0				0	0		doi: 10.1016/j.exer.2016.12.005	Levin LA, Crowe ME, Quigley HA; Lasker/IRRF Initiative on Astrocytes and Glaucomatous Neurodegeneration Participants.., Neuroprotection for glaucoma: Requirements for clinical translation. Exp Eye Res. 2017
304	Intraocular Pressure Course During the Femtosecond Laser-Assisted Cataract Surgery in Porcine Cadaver Eyes.	Sperl P, Strohmaier C, Kraker H, Motloch K, Lenzhofer M, Moussa S, Reitsamer HA.	Invest Ophthalmol Vis Sci. 2017 Dec 1;58(14):6457-6461. doi: 10.1167/iovs.17-21948.	Invest Ophthalmol Vis Sci		2017			0.0480511		doi: 10.1167/iovs.17-21948	29261846					0			0				0	0		doi: 10.1167/iovs.17-21948	Sperl P, Strohmaier C, Kraker H, Motloch K, Lenzhofer M, Moussa S, Reitsamer HA., Intraocular Pressure Course During the Femtosecond Laser-Assisted Cataract Surgery in Porcine Cadaver Eyes. Invest Ophthalmol Vis Sci. 2017
4957	Orbital melanoma masquerading as a "Galloping haemangioma".	Lorenzano D, Miszkiel K, Rose GE.	Orbit. 2017 Apr;36(2):81-83. doi: 10.1080/01676830.2017.1279657. Epub 2017 Mar 3.	Orbit		2017			0.0480632		doi: 10.1080/01676830.2017.1279657	28388343					0			0				0	0		doi: 10.1080/01676830.2017.1279657	Lorenzano D, Miszkiel K, Rose GE., Orbital melanoma masquerading as a "Galloping haemangioma". Orbit. 2017
3766	Switch to aflibercept or ranibizumab after initial treatment with bevacizumab in eyes with neovascular AMD.	Waizel M, Todorova MG, Masyk M, Wolf K, Rickmann A, Helaiwa K, Blanke BR, Szurman P.	BMC Ophthalmol. 2017 May 23;17(1):79. doi: 10.1186/s12886-017-0471-x.	BMC Ophthalmol		2017			0.0480661		doi: 10.1186/s12886-017-0471-x	28535756					0			0				0	0		doi: 10.1186/s12886-017-0471-x	Waizel M, Todorova MG, Masyk M, Wolf K, Rickmann A, Helaiwa K, Blanke BR, Szurman P., Switch to aflibercept or ranibizumab after initial treatment with bevacizumab in eyes with neovascular AMD. BMC Ophthalmol. 2017
2994	Transcriptomic Profiling of Posterior Polymorphous Corneal Dystrophy.	Chung DD, Frausto RF, Lin BR, Hanser EM, Cohen Z, Aldave AJ.	Invest Ophthalmol Vis Sci. 2017 Jun 1;58(7):3202-3214. doi: 10.1167/iovs.17-21423.	Invest Ophthalmol Vis Sci		2017			0.0482729		doi: 10.1167/iovs.17-21423	28654985					0			0				0	0		doi: 10.1167/iovs.17-21423	Chung DD, Frausto RF, Lin BR, Hanser EM, Cohen Z, Aldave AJ., Transcriptomic Profiling of Posterior Polymorphous Corneal Dystrophy. Invest Ophthalmol Vis Sci. 2017
1645	Postvitrectomy macular hole undergoing delayed closure after 28 months.	Patel R, Gopalakrishnan M, Rajesh B, Giridhar A.	Indian J Ophthalmol. 2017 Sep;65(9):882-884. doi: 10.4103/ijo.IJO_426_17.	Indian J Ophthalmol		2017			0.0483279		doi: 10.4103/ijo.IJO_426_17	28905839					0			0				0	0		doi: 10.4103/ijo.IJO_426_17	Patel R, Gopalakrishnan M, Rajesh B, Giridhar A., Postvitrectomy macular hole undergoing delayed closure after 28 months. Indian J Ophthalmol. 2017
2061	Analysis of Cone Mosaic Reflectance Properties in Healthy Eyes and in Eyes With Nonproliferative Diabetic Retinopathy Over Time.	Mariotti L, Devaney N, Lombardo G, Lombardo M.	Invest Ophthalmol Vis Sci. 2017 Aug 1;58(10):4057-4067. doi: 10.1167/iovs.17-21932.	Invest Ophthalmol Vis Sci		2017			0.0483433		doi: 10.1167/iovs.17-21932	28820921					0			0				0	0		doi: 10.1167/iovs.17-21932	Mariotti L, Devaney N, Lombardo G, Lombardo M., Analysis of Cone Mosaic Reflectance Properties in Healthy Eyes and in Eyes With Nonproliferative Diabetic Retinopathy Over Time. Invest Ophthalmol Vis Sci. 2017
3765	Effect of induced high myopia on functional MRI signal changes.	Mirzajani A, Ghorbani M, Rasuli B, Mahmoud-Pashazadeh A.	Phys Med. 2017 May;37:32-36. doi: 10.1016/j.ejmp.2017.04.004. Epub 2017 Apr 11.	Phys Med		2017			0.04838		doi: 10.1016/j.ejmp.2017.04.004	28535912					0			0				0	0		doi: 10.1016/j.ejmp.2017.04.004	Mirzajani A, Ghorbani M, Rasuli B, Mahmoud-Pashazadeh A., Effect of induced high myopia on functional MRI signal changes. Phys Med. 2017
4859	Intraoperative Optical Coherence Tomography-Assisted Descemet Stripping Automated Endothelial Keratoplasty for Anterior Chamber Fibrous Ingrowth.	Shazly TA, To LK, Conner IP, Espandar L.	Cornea. 2017 Jun;36(6):757-758. doi: 10.1097/ICO.0000000000001192.	Cornea		2017			0.0485857		doi: 10.1097/ICO.0000000000001192	28399038					0			0				0	0		doi: 10.1097/ICO.0000000000001192	Shazly TA, To LK, Conner IP, Espandar L., Intraoperative Optical Coherence Tomography-Assisted Descemet Stripping Automated Endothelial Keratoplasty for Anterior Chamber Fibrous Ingrowth. Cornea. 2017
5561	Grooved Glaucoma Drainage Devices That Continuously Deliver Cyclosporine A Decrease Postsurgical Scar Formation in Rabbit Eyes.	Dai Z, Yu X, Sun J, Sun X.	Invest Ophthalmol Vis Sci. 2017 Mar 1;58(3):1692-1701. doi: 10.1167/iovs.16-21065.	Invest Ophthalmol Vis Sci		2017			0.0485936		doi: 10.1167/iovs.16-21065	28319643					0			0				0	0		doi: 10.1167/iovs.16-21065	Dai Z, Yu X, Sun J, Sun X., Grooved Glaucoma Drainage Devices That Continuously Deliver Cyclosporine A Decrease Postsurgical Scar Formation in Rabbit Eyes. Invest Ophthalmol Vis Sci. 2017
10434	The IRIS® Registry : Purpose and perspectives.	Parke Ii DW, Lum F, Rich WL.	Ophthalmologe. 2017 Jan;114(Suppl 1):1-6. doi: 10.1007/s00347-016-0265-1. Review.	Ophthalmologe		2017			0.0486141		doi: 10.1007/s00347-016-0265-1	27306823					0			0				0	0		doi: 10.1007/s00347-016-0265-1	Parke Ii DW, Lum F, Rich WL., The IRIS® Registry : Purpose and perspectives. Ophthalmologe. 2017
6314	Diagnosis and Treatment of Non-24-h Sleep-Wake Disorder in the Blind.	Emens JS, Eastman CI.	Drugs. 2017 Apr;77(6):637-650. doi: 10.1007/s40265-017-0707-3. Review.	Drugs		2017			0.0486963		doi: 10.1007/s40265-017-0707-3	28229310					0			0				0	0		doi: 10.1007/s40265-017-0707-3	Emens JS, Eastman CI., Diagnosis and Treatment of Non-24-h Sleep-Wake Disorder in the Blind. Drugs. 2017
4429	A Pilot Randomized Trial on Safety and Efficacy of a Novel Topical Combined Inhibitor of Janus Kinase 1/3 and Spleen Tyrosine Kinase for GVHD-Associated Ocular Surface Disease.	Kheirkhah A, Di Zazzo A, Satitpitakul V, Fernandez M, Magilavy D, Dana R.	Cornea. 2017 Jul;36(7):799-804. doi: 10.1097/ICO.0000000000001206.	Cornea		2017			0.0487232		doi: 10.1097/ICO.0000000000001206	28445193					0			0				0	0		doi: 10.1097/ICO.0000000000001206	Kheirkhah A, Di Zazzo A, Satitpitakul V, Fernandez M, Magilavy D, Dana R., A Pilot Randomized Trial on Safety and Efficacy of a Novel Topical Combined Inhibitor of Janus Kinase 1/3 and Spleen Tyrosine Kinase for GVHD-Associated Ocular Surface Disease. Cornea. 2017
3296	Parapapillary Deep-Layer Microvasculature Dropout in Glaucoma: Topographic Association With Glaucomatous Damage.	Lee EJ, Lee SH, Kim JA, Kim TW.	Invest Ophthalmol Vis Sci. 2017 Jun 1;58(7):3004-3010. doi: 10.1167/iovs.17-21918.	Invest Ophthalmol Vis Sci		2017			0.0489287		doi: 10.1167/iovs.17-21918	28605811					0			0				0	0		doi: 10.1167/iovs.17-21918	Lee EJ, Lee SH, Kim JA, Kim TW., Parapapillary Deep-Layer Microvasculature Dropout in Glaucoma: Topographic Association With Glaucomatous Damage. Invest Ophthalmol Vis Sci. 2017
1405	Roles of TRIM32 in Corneal Epithelial Cells After Infection with Herpes Simplex Virus.	Cui H, Liu Y, Huang Y.	Cell Physiol Biochem. 2017;43(2):801-811. doi: 10.1159/000481563. Epub 2017 Sep 28.	Cell Physiol Biochem		2017			0.0489467		doi: 10.1159/000481563	28954259					0			0				0	0		doi: 10.1159/000481563	Cui H, Liu Y, Huang Y., Roles of TRIM32 in Corneal Epithelial Cells After Infection with Herpes Simplex Virus. Cell Physiol Biochem. 2017
8558	Relevant variations and neuroprotecive effect of hydrogen sulfide in a rat glaucoma model.	Huang S, Huang P, Liu X, Lin Z, Wang J, Xu S, Guo L, Leung CK, Zhong Y.	Neuroscience. 2017 Jan 26;341:27-41. doi: 10.1016/j.neuroscience.2016.11.019. Epub 2016 Nov 24.	Neuroscience		2017			0.0490086		doi: 10.1016/j.neuroscience.2016.11.019	27890826					0			0				0	0		doi: 10.1016/j.neuroscience.2016.11.019	Huang S, Huang P, Liu X, Lin Z, Wang J, Xu S, Guo L, Leung CK, Zhong Y., Relevant variations and neuroprotecive effect of hydrogen sulfide in a rat glaucoma model. Neuroscience. 2017
3844	A quick, simple method for detecting circulating fluorescent advanced glycation end-products: Correlation with in vitro and in vivo non-enzymatic glycation.	Villa M, Parravano M, Micheli A, Gaddini L, Matteucci A, Mallozzi C, Facchiano F, Malchiodi-Albedi F, Pricci F.	Metabolism. 2017 Jun;71:64-69. doi: 10.1016/j.metabol.2017.03.004. Epub 2017 Mar 9.	Metabolism		2017			0.0490525		doi: 10.1016/j.metabol.2017.03.004	28521879					0			0				0	0		doi: 10.1016/j.metabol.2017.03.004	Villa M, Parravano M, Micheli A, Gaddini L, Matteucci A, Mallozzi C, Facchiano F, Malchiodi-Albedi F, Pricci F., A quick, simple method for detecting circulating fluorescent advanced glycation end-products: Correlation with in vitro and in vivo non-enzymatic glycation. Metabolism. 2017
4561	Proteins oxidation and autoantibodies' reactivity against hydrogen peroxide and malondialdehyde -oxidized thyroid antigens in patients' plasmas with Graves' disease and Hashimoto Thyroiditis.	Mseddi M, Ben Mansour R, Gargouri B, Mnif F, El Ghawi S, Hammami B, Ghorbel A, Abid M, Lassoued S.	Chem Biol Interact. 2017 Jun 25;272:145-152. doi: 10.1016/j.cbi.2017.04.013. Epub 2017 Apr 18.	Chem Biol Interact		2017			0.0490779		doi: 10.1016/j.cbi.2017.04.013	28431875					0			0				0	0		doi: 10.1016/j.cbi.2017.04.013	Mseddi M, Ben Mansour R, Gargouri B, Mnif F, El Ghawi S, Hammami B, Ghorbel A, Abid M, Lassoued S., Proteins oxidation and autoantibodies' reactivity against hydrogen peroxide and malondialdehyde -oxidized thyroid antigens in patients' plasmas with Graves' disease and Hashimoto Thyroiditis. Chem Biol Interact. 2017
7089	A New Method of Subretinal Injection of Tissue Plasminogen Activator and Air in Patients With Submacular Hemorrhage.	Novelli FJD, Preti RC, Monteiro MLR, Nóbrega MJ, Takahashi WY.	Retina. 2017 Aug;37(8):1607-1611. doi: 10.1097/IAE.0000000000001491. No abstract available.	Retina		2017			0.0491482		doi: 10.1097/IAE.0000000000001491	28129217					0			0				0	0		doi: 10.1097/IAE.0000000000001491	Novelli FJD, Preti RC, Monteiro MLR, Nóbrega MJ, Takahashi WY., A New Method of Subretinal Injection of Tissue Plasminogen Activator and Air in Patients With Submacular Hemorrhage. Retina. 2017
733	Gambogic acid ameliorates diabetes-induced proliferative retinopathy through inhibition of the HIF-1α/VEGF expression via targeting PI3K/AKT pathway.	Cui J, Gong R, Hu S, Cai L, Chen L.	Life Sci. 2018 Jan 1;192:293-303. doi: 10.1016/j.lfs.2017.11.007. Epub 2017 Nov 10.	Life Sci		2018			0.0492008		doi: 10.1016/j.lfs.2017.11.007	29129773					0			0				0	0		doi: 10.1016/j.lfs.2017.11.007	Cui J, Gong R, Hu S, Cai L, Chen L., Gambogic acid ameliorates diabetes-induced proliferative retinopathy through inhibition of the HIF-1α/VEGF expression via targeting PI3K/AKT pathway. Life Sci. 2018
8876	Histopathologic Analysis of Transvitreal Fine Needle Aspiration Biopsy Needle Tracts for Uveal Melanoma.	Kim RS, Chevez-Barrios P, Bretana ME, Wong TP, Teh BS, Schefler AC.	Am J Ophthalmol. 2017 Feb;174:9-16. doi: 10.1016/j.ajo.2016.10.019. Epub 2016 Nov 4.	Am J Ophthalmol		2017			0.0493825		doi: 10.1016/j.ajo.2016.10.019	27818205					0			0				0	0		doi: 10.1016/j.ajo.2016.10.019	Kim RS, Chevez-Barrios P, Bretana ME, Wong TP, Teh BS, Schefler AC., Histopathologic Analysis of Transvitreal Fine Needle Aspiration Biopsy Needle Tracts for Uveal Melanoma. Am J Ophthalmol. 2017
5570	Cell Therapy for Age-Related Macular Degeneration: A New Vision for the Bone Marrow?	Ljubimov AV.	Mol Ther. 2017 Apr 5;25(4):832-833. doi: 10.1016/j.ymthe.2017.03.004. Epub 2017 Mar 15. No abstract available.	Mol Ther		2017			0.0494111		doi: 10.1016/j.ymthe.2017.03.004	28318930					0			0				0	0		doi: 10.1016/j.ymthe.2017.03.004	Ljubimov AV., Cell Therapy for Age-Related Macular Degeneration: A New Vision for the Bone Marrow? Mol Ther. 2017
6287	Umbilical cord stem cells in the treatment of corneal disease.	Ziaei M, Zhang J, Patel DV, McGhee CNJ.	Surv Ophthalmol. 2017 Nov - Dec;62(6):803-815. doi: 10.1016/j.survophthal.2017.02.002. Epub 2017 Feb 21. Review.	Surv Ophthalmol		2017			0.0494826		doi: 10.1016/j.survophthal.2017.02.002	28232219					0			0				0	0		doi: 10.1016/j.survophthal.2017.02.002	Ziaei M, Zhang J, Patel DV, McGhee CNJ., Umbilical cord stem cells in the treatment of corneal disease. Surv Ophthalmol. 2017
5535	Microarray-based analysis of gene expression profiles in peripheral blood of patients with acute primary angle closure.	Jeoung JW, Ko JH, Kim YJ, Kim YW, Park KH, Oh JY.	Ophthalmic Genet. 2017 Dec;38(6):520-526. doi: 10.1080/13816810.2017.1300922. Epub 2017 Mar 21.	Ophthalmic Genet		2017			0.0496053		doi: 10.1080/13816810.2017.1300922	28323501					0			0				0	0		doi: 10.1080/13816810.2017.1300922	Jeoung JW, Ko JH, Kim YJ, Kim YW, Park KH, Oh JY., Microarray-based analysis of gene expression profiles in peripheral blood of patients with acute primary angle closure. Ophthalmic Genet. 2017
1252	Preoperative photocoagulation reduces corneal endothelial cell damage after vitrectomy in patients with proliferative diabetic retinopathy.	Zhong J, Jia J, Yu J, Zhang L, Xiang Y.	Medicine (Baltimore). 2017 Oct;96(40):e7971. doi: 10.1097/MD.0000000000007971.	Medicine (Baltimore)		2017			0.0498392		doi: 10.1097/MD.0000000000007971	28984756					0			0				0	0		doi: 10.1097/MD.0000000000007971	Zhong J, Jia J, Yu J, Zhang L, Xiang Y., Preoperative photocoagulation reduces corneal endothelial cell damage after vitrectomy in patients with proliferative diabetic retinopathy. Medicine (Baltimore). 2017
9266	Evaluation and management of the swollen optic disk in cryptococcal meningitis.	Rigi M, Khan K, Smith SV, Suleiman AO, Lee AG.	Surv Ophthalmol. 2017 Mar - Apr;62(2):150-160. doi: 10.1016/j.survophthal.2016.10.004. Epub 2016 Oct 15. Review.	Surv Ophthalmol		2017			0.0498955		doi: 10.1016/j.survophthal.2016.10.004	27751821					0			0				0	0		doi: 10.1016/j.survophthal.2016.10.004	Rigi M, Khan K, Smith SV, Suleiman AO, Lee AG., Evaluation and management of the swollen optic disk in cryptococcal meningitis. Surv Ophthalmol. 2017
3085	Applying artificial intelligence to disease staging: Deep learning for improved staging of diabetic retinopathy.	Takahashi H, Tampo H, Arai Y, Inoue Y, Kawashima H.	PLoS One. 2017 Jun 22;12(6):e0179790. doi: 10.1371/journal.pone.0179790. eCollection 2017.	PLoS One		2017			0.0498989		doi: 10.1371/journal.pone.0179790	28640840					0			0				0	0		doi: 10.1371/journal.pone.0179790	Takahashi H, Tampo H, Arai Y, Inoue Y, Kawashima H., Applying artificial intelligence to disease staging: Deep learning for improved staging of diabetic retinopathy. PLoS One. 2017
10997	X-linked ectodermal dysplasia receptor (XEDAR) gene silencing prevents caspase-3-mediated apoptosis in Sjögren's syndrome.	Sisto M, Lorusso L, Lisi S.	Clin Exp Med. 2017 Feb;17(1):111-119. doi: 10.1007/s10238-015-0404-z. Epub 2015 Dec 11.	Clin Exp Med		2017			0.049961		doi: 10.1007/s10238-015-0404-z	26659383					0			0				0	0		doi: 10.1007/s10238-015-0404-z	Sisto M, Lorusso L, Lisi S., X-linked ectodermal dysplasia receptor (XEDAR) gene silencing prevents caspase-3-mediated apoptosis in Sjögren's syndrome. Clin Exp Med. 2017
7144	Acute Anterior Uveitis as a Risk Factor of Ankylosing Spondylitis-A National Population-Based Study.	Yen JC, Hsu CA, Hsiao SH, Hsu MH.	Int J Environ Res Public Health. 2017 Jan 23;14(1). pii: E107. doi: 10.3390/ijerph14010107.	Int J Environ Res Public Health		2017			0.0501804		doi: 10.3390/ijerph14010107	28124984					0			0				0	0		doi: 10.3390/ijerph14010107	Yen JC, Hsu CA, Hsiao SH, Hsu MH., Acute Anterior Uveitis as a Risk Factor of Ankylosing Spondylitis-A National Population-Based Study. Int J Environ Res Public Health. 2017
9581	Intraoperative management of anterior capsular tear.	Moshirfar M, Skanchy DF, Shah T.	Curr Opin Ophthalmol. 2017 Jan;28(1):42-48. Review.	Curr Opin Ophthalmol		2017			0.0502648		#VALUE!	27653604					0			0				0	0		#VALUE!	Moshirfar M, Skanchy DF, Shah T., Intraoperative management of anterior capsular tear. Curr Opin Ophthalmol. 2017
9211	TSHR Gene Polymorphisms in the Enhancer Regions Are Most Strongly Associated with the Development of Graves' Disease, Especially Intractable Disease, and of Hashimoto's Disease.	Fujii A, Inoue N, Watanabe M, Kawakami C, Hidaka Y, Hayashizaki Y, Iwatani Y.	Thyroid. 2017 Jan;27(1):111-119. doi: 10.1089/thy.2016.0345. Epub 2016 Nov 18.	Thyroid		2017			0.0502898		doi: 10.1089/thy.2016.0345	27762730					0			0				0	0		doi: 10.1089/thy.2016.0345	Fujii A, Inoue N, Watanabe M, Kawakami C, Hidaka Y, Hayashizaki Y, Iwatani Y., TSHR Gene Polymorphisms in the Enhancer Regions Are Most Strongly Associated with the Development of Graves' Disease, Especially Intractable Disease, and of Hashimoto's Disease. Thyroid. 2017
10111	Vascular rarefaction at the choriocapillaris in acute posterior multifocal placoid pigment epitheliopathy viewed on OCT angiography.	Kinouchi R, Nishikawa N, Ishibazawa A, Yoshida A.	Int Ophthalmol. 2017 Jun;37(3):733-736. doi: 10.1007/s10792-016-0308-2. Epub 2016 Jul 28.	Int Ophthalmol		2017			0.0502962		doi: 10.1007/s10792-016-0308-2	27469195					0			0				0	0		doi: 10.1007/s10792-016-0308-2	Kinouchi R, Nishikawa N, Ishibazawa A, Yoshida A., Vascular rarefaction at the choriocapillaris in acute posterior multifocal placoid pigment epitheliopathy viewed on OCT angiography. Int Ophthalmol. 2017
2002	Ultrasound parameters of normal lacrimal sac and chronic dacryocystitis.	Machado MAC, Silva JAF, Garcia EA, Allemann N.	Arq Bras Oftalmol. 2017 Jun;80(3):172-175. doi: 10.5935/0004-2749.20170042.	Arq Bras Oftalmol		2017			0.0504313		doi: 10.5935/0004-2749.20170042	28832742					0			0				0	0		doi: 10.5935/0004-2749.20170042	Machado MAC, Silva JAF, Garcia EA, Allemann N., Ultrasound parameters of normal lacrimal sac and chronic dacryocystitis. Arq Bras Oftalmol. 2017
6935	Lacrimal intubation during dacryocystorhinostomy utilizing the STENTube.	Shinder R, Wu A, Mehendale RA, Tang SX, Nasser QJ, Chou E, Sniegowski MC, Janda A, Shepler TR, Blaydon SM, Nakra T.	Orbit. 2017 Feb;36(1):6-12. doi: 10.1080/01676830.2017.1279642. Epub 2017 Feb 1.	Orbit		2017			0.0505285		doi: 10.1080/01676830.2017.1279642	28145798					0			0				0	0		doi: 10.1080/01676830.2017.1279642	Shinder R, Wu A, Mehendale RA, Tang SX, Nasser QJ, Chou E, Sniegowski MC, Janda A, Shepler TR, Blaydon SM, Nakra T., Lacrimal intubation during dacryocystorhinostomy utilizing the STENTube. Orbit. 2017
460	Awareness and eye health-seeking practices for cataract among urban slum population of Delhi: The North India eye disease awareness study.	Misra V, Vashist P, Singh SS, Malhotra S, Gupta V, Dwivedi SN, Gupta SK.	Indian J Ophthalmol. 2017 Dec;65(12):1483-1488. doi: 10.4103/ijo.IJO_585_16.	Indian J Ophthalmol		2017			0.050556		doi: 10.4103/ijo.IJO_585_16	29208840					0			0				0	0		doi: 10.4103/ijo.IJO_585_16	Misra V, Vashist P, Singh SS, Malhotra S, Gupta V, Dwivedi SN, Gupta SK., Awareness and eye health-seeking practices for cataract among urban slum population of Delhi: The North India eye disease awareness study. Indian J Ophthalmol. 2017
190	Orbital sparganosis in an 8-year boy: a case report.	Xie X, Hu J, Sun G, Ding B, Feng L.	BMC Ophthalmol. 2018 Jan 22;18(1):13. doi: 10.1186/s12886-018-0675-8.	BMC Ophthalmol		2018			0.0506303		doi: 10.1186/s12886-018-0675-8	29357839					0			0				0	0		doi: 10.1186/s12886-018-0675-8	Xie X, Hu J, Sun G, Ding B, Feng L., Orbital sparganosis in an 8-year boy: a case report. BMC Ophthalmol. 2018
6755	Increased risk for age-related impairment in visual attention associated with mild traumatic brain injury: Evidence from saccadic response times.	Hershaw JN, Barry DM, Ettenhofer ML.	PLoS One. 2017 Feb 6;12(2):e0171752. doi: 10.1371/journal.pone.0171752. eCollection 2017.	PLoS One		2017			0.0507613		doi: 10.1371/journal.pone.0171752	28166259					0			0				0	0		doi: 10.1371/journal.pone.0171752	Hershaw JN, Barry DM, Ettenhofer ML., Increased risk for age-related impairment in visual attention associated with mild traumatic brain injury: Evidence from saccadic response times. PLoS One. 2017
1235	Low-dose ranibizumab as primary treatment of posterior type I retinopathy of prematurity.	Ells AL, Wesolosky JD, Ingram AD, Mitchell PC, Platt AS.	Can J Ophthalmol. 2017 Oct;52(5):468-474. doi: 10.1016/j.jcjo.2017.02.012. Epub 2017 Jul 19.	Can J Ophthalmol		2017			0.0508994		doi: 10.1016/j.jcjo.2017.02.012	28985806					0			0				0	0		doi: 10.1016/j.jcjo.2017.02.012	Ells AL, Wesolosky JD, Ingram AD, Mitchell PC, Platt AS., Low-dose ranibizumab as primary treatment of posterior type I retinopathy of prematurity. Can J Ophthalmol. 2017
9597	EXUDATIVE RETINAL DETACHMENT CAUSED BY A CHOROIDAL NEOVASCULAR MEMBRANE IN HALLERMANN-STREIFF SYNDROME.	AlAli A, Bourgault S, Clark I, Lam WC.	Retin Cases Brief Rep. 2018 Winter;12(1):45-47. doi: 10.1097/ICB.0000000000000411.	Retin Cases Brief Rep		2018			0.0509216		doi: 10.1097/ICB.0000000000000411	27648586					0			0				0	0		doi: 10.1097/ICB.0000000000000411	AlAli A, Bourgault S, Clark I, Lam WC., EXUDATIVE RETINAL DETACHMENT CAUSED BY A CHOROIDAL NEOVASCULAR MEMBRANE IN HALLERMANN-STREIFF SYNDROME. Retin Cases Brief Rep. 2018
1467	Tear film evaluation and management in soft contact lens wear: a systematic approach.	Downie LE, Craig JP.	Clin Exp Optom. 2017 Sep;100(5):438-458. doi: 10.1111/cxo.12597. Review.	Clin Exp Optom		2017			0.0509717		doi: 10.1111/cxo.12597	28940531					0			0				0	0		doi: 10.1111/cxo.12597	Downie LE, Craig JP., Tear film evaluation and management in soft contact lens wear: a systematic approach. Clin Exp Optom. 2017
4566	Associations between matrix metalloproteinase gene polymorphisms and glaucoma susceptibility: a meta-analysis.	Wu MY, Wu Y, Zhang Y, Liu CY, Deng CY, Peng L, Zhou L.	BMC Ophthalmol. 2017 Apr 21;17(1):48. doi: 10.1186/s12886-017-0442-2. Review.	BMC Ophthalmol		2017			0.0509732		doi: 10.1186/s12886-017-0442-2	28431514					0			0				0	0		doi: 10.1186/s12886-017-0442-2	Wu MY, Wu Y, Zhang Y, Liu CY, Deng CY, Peng L, Zhou L., Associations between matrix metalloproteinase gene polymorphisms and glaucoma susceptibility: a meta-analysis. BMC Ophthalmol. 2017
6795	A Prospective Evaluation of Posterior Capsule Opacification in Eyes With Posterior Capsule Plaque-A Case-Control Study.	Vasavada AR, Praveen MR, Shah GD, Johar K, Sankaranarayanan R.	Asia Pac J Ophthalmol (Phila). 2017 Jan-Feb;6(1):13-20. doi: 10.1097/APO.0000000000000199.	Asia Pac J Ophthalmol (Phila)		2017			0.0511158		doi: 10.1097/APO.0000000000000199	28161922					0			0				0	0		doi: 10.1097/APO.0000000000000199	Vasavada AR, Praveen MR, Shah GD, Johar K, Sankaranarayanan R., A Prospective Evaluation of Posterior Capsule Opacification in Eyes With Posterior Capsule Plaque-A Case-Control Study. Asia Pac J Ophthalmol (Phila). 2017
3428	Stereotactic Radiosurgery and Fractionated Stereotactic Radiation Therapy for the Treatment of Uveal Melanoma.	Yazici G, Kiratli H, Ozyigit G, Sari SY, Cengiz M, Tarlan B, Mocan BO, Zorlu F.	Int J Radiat Oncol Biol Phys. 2017 May 1;98(1):152-158. doi: 10.1016/j.ijrobp.2017.02.017. Epub 2017 Feb 17.	Int J Radiat Oncol Biol Phys		2017			0.0512905		doi: 10.1016/j.ijrobp.2017.02.017	28586956					0			0				0	0		doi: 10.1016/j.ijrobp.2017.02.017	Yazici G, Kiratli H, Ozyigit G, Sari SY, Cengiz M, Tarlan B, Mocan BO, Zorlu F., Stereotactic Radiosurgery and Fractionated Stereotactic Radiation Therapy for the Treatment of Uveal Melanoma. Int J Radiat Oncol Biol Phys. 2017
351	The application of wide-field laser ophthalmoscopy in fundus examination before myopic refractive surgery.	Liu L, Wang F, Xu D, Xie C, Zou J.	BMC Ophthalmol. 2017 Dec 15;17(1):250. doi: 10.1186/s12886-017-0647-4.	BMC Ophthalmol		2017			0.0512972		doi: 10.1186/s12886-017-0647-4	29246204					0			0				0	0		doi: 10.1186/s12886-017-0647-4	Liu L, Wang F, Xu D, Xie C, Zou J., The application of wide-field laser ophthalmoscopy in fundus examination before myopic refractive surgery. BMC Ophthalmol. 2017
862	Astigmatism evaluation prior to cataract surgery.	Gupta PC, Caty JT.	Curr Opin Ophthalmol. 2018 Jan;29(1):9-13. doi: 10.1097/ICU.0000000000000446. Review.	Curr Opin Ophthalmol		2018			0.0513251		doi: 10.1097/ICU.0000000000000446	29084004					0			0				0	0		doi: 10.1097/ICU.0000000000000446	Gupta PC, Caty JT., Astigmatism evaluation prior to cataract surgery. Curr Opin Ophthalmol. 2018
5138	Use of Ocular Hypotensive Medications in Portugal: PEM Study: A Cross-sectional Nationwide Analysis.	Sousa DC, Leal I, Nascimento N, Marques-Neves C, Tuulonen A, Abegão Pinto L.	J Glaucoma. 2017 Jun;26(6):571-576. doi: 10.1097/IJG.0000000000000668. Erratum in: J Glaucoma. 2017 Oct;26(10 ):961.	J Glaucoma		2017			0.0513639		doi: 10.1097/IJG.0000000000000668	28368997					0			0				0	0		doi: 10.1097/IJG.0000000000000668	Sousa DC, Leal I, Nascimento N, Marques-Neves C, Tuulonen A, Abegão Pinto L., Use of Ocular Hypotensive Medications in Portugal: PEM Study: A Cross-sectional Nationwide Analysis. J Glaucoma. 2017
9837	Anxiety and Atopic Disease: Comorbidity in a Youth Mental Health Setting.	Becker-Haimes EM, Diaz KI, Haimes BA, Ehrenreich-May J.	Child Psychiatry Hum Dev. 2017 Aug;48(4):528-536. doi: 10.1007/s10578-016-0678-8.	Child Psychiatry Hum Dev		2017			0.0513668		doi: 10.1007/s10578-016-0678-8	27566718					0			0				0	0		doi: 10.1007/s10578-016-0678-8	Becker-Haimes EM, Diaz KI, Haimes BA, Ehrenreich-May J., Anxiety and Atopic Disease: Comorbidity in a Youth Mental Health Setting. Child Psychiatry Hum Dev. 2017
4089	Rare NOX3 Variants Confer Susceptibility to Agranulocytosis During Thyrostatic Treatment of Graves' Disease.	Plantinga TS, Arts P, Knarren GH, Mulder AH, Wakelkamp IM, Hermus AR, Joosten LA, Netea MG, Bisschop PH, de Herder WW, Beijers HJ, de Bruin IJ, Gilissen C, Veltman JA, Hoischen A, Smit JW, Netea-Maier RT.	Clin Pharmacol Ther. 2017 Dec;102(6):1017-1024. doi: 10.1002/cpt.733. Epub 2017 Jul 10.	Clin Pharmacol Ther		2017			0.0513971		doi: 10.1002/cpt.733	28486791					0			0				0	0		doi: 10.1002/cpt.733	Plantinga TS, Arts P, Knarren GH, Mulder AH, Wakelkamp IM, Hermus AR, Joosten LA, Netea MG, Bisschop PH, de Herder WW, Beijers HJ, de Bruin IJ, Gilissen C, Veltman JA, Hoischen A, Smit JW, Netea-Maier RT., Rare NOX3 Variants Confer Susceptibility to Agranulocytosis During Thyrostatic Treatment of Graves' Disease. Clin Pharmacol Ther. 2017
10151	Signs and Symptoms of Dry Eye in Keratoconus Patients Before and After Intrastromal Corneal Rings Surgery.	Carracedo G, Recchioni A, Alejandre-Alba N, Martin-Gil A, Batres L, Morote IJ, Pintor J.	Curr Eye Res. 2017 Apr;42(4):513-519. doi: 10.1080/02713683.2016.1200098. Epub 2016 Jul 22.	Curr Eye Res		2017			0.051791		doi: 10.1080/02713683.2016.1200098	27450910					0			0				0	0		doi: 10.1080/02713683.2016.1200098	Carracedo G, Recchioni A, Alejandre-Alba N, Martin-Gil A, Batres L, Morote IJ, Pintor J., Signs and Symptoms of Dry Eye in Keratoconus Patients Before and After Intrastromal Corneal Rings Surgery. Curr Eye Res. 2017
4135	Risk factors for diabetic retinopathy among homeless veterans.	Davis JA, Tsui I, Gelberg L, Gabrielian S, Lee ML, Chang ET.	Psychol Serv. 2017 May;14(2):221-228. doi: 10.1037/ser0000148.	Psychol Serv		2017			0.0520216		doi: 10.1037/ser0000148	28481608					0			0				0	0		doi: 10.1037/ser0000148	Davis JA, Tsui I, Gelberg L, Gabrielian S, Lee ML, Chang ET., Risk factors for diabetic retinopathy among homeless veterans. Psychol Serv. 2017
1322	Myopia and Exposure to Organophosphate and Pyrethroid Pesticides in the General United States Population.	Migneron-Foisy V, Bouchard MF, Freeman EE, Saint-Amour D.	Invest Ophthalmol Vis Sci. 2017 Sep 1;58(11):4915-4924. doi: 10.1167/iovs.16-20493.	Invest Ophthalmol Vis Sci		2017			0.0520335		doi: 10.1167/iovs.16-20493	28973337					0			0				0	0		doi: 10.1167/iovs.16-20493	Migneron-Foisy V, Bouchard MF, Freeman EE, Saint-Amour D., Myopia and Exposure to Organophosphate and Pyrethroid Pesticides in the General United States Population. Invest Ophthalmol Vis Sci. 2017
8136	Hypertensive eye disease: a review.	Fraser-Bell S, Symes R, Vaze A.	Clin Exp Ophthalmol. 2017 Jan;45(1):45-53. doi: 10.1111/ceo.12905. Epub 2017 Jan 21. Review.	Clin Exp Ophthalmol		2017			0.0522078		doi: 10.1111/ceo.12905	27990740					0			0				0	0		doi: 10.1111/ceo.12905	Fraser-Bell S, Symes R, Vaze A., Hypertensive eye disease: a review. Clin Exp Ophthalmol. 2017
6014	A Drosophila model of dominant inclusion body myopathy type 3 shows diminished myosin kinetics that reduce muscle power and yield myofibrillar defects.	Suggs JA, Melkani GC, Glasheen BM, Detor MM, Melkani A, Marsan NP, Swank DM, Bernstein SI.	Dis Model Mech. 2017 Jun 1;10(6):761-771. doi: 10.1242/dmm.028050. Epub 2017 Mar 3.	Dis Model Mech		2017			0.0523733		doi: 10.1242/dmm.028050	28258125					0			0				0	0		doi: 10.1242/dmm.028050	Suggs JA, Melkani GC, Glasheen BM, Detor MM, Melkani A, Marsan NP, Swank DM, Bernstein SI., A Drosophila model of dominant inclusion body myopathy type 3 shows diminished myosin kinetics that reduce muscle power and yield myofibrillar defects. Dis Model Mech. 2017
4106	HIF1A (rs11549465) and AKNA (rs10817595) Gene Polymorphisms Are Associated with Primary Sjögren's Syndrome.	Hernández-Molina G, Rodríguez-Pérez JM, Fernández-Torres J, Lima G, Pérez-Hernández N, López-Reyes A, Martínez-Nava GA.	Biomed Res Int. 2017;2017:5845849. doi: 10.1155/2017/5845849. Epub 2017 Apr 6.	Biomed Res Int		2017			0.0523818		doi: 10.1155/2017/5845849	28484714					0			0				0	0		doi: 10.1155/2017/5845849	Hernández-Molina G, Rodríguez-Pérez JM, Fernández-Torres J, Lima G, Pérez-Hernández N, López-Reyes A, Martínez-Nava GA., HIF1A (rs11549465) and AKNA (rs10817595) Gene Polymorphisms Are Associated with Primary Sjögren's Syndrome. Biomed Res Int. 2017
6156	Surgical Outcomes of Porcine Acellular Dermis Graft in Anophthalmic Socket: Comparison with Oral Mucosa Graft.	Teo L, Woo YJ, Kim DK, Kim CY, Yoon JS.	Korean J Ophthalmol. 2017 Feb;31(1):9-15. doi: 10.3341/kjo.2017.31.1.9. Epub 2017 Feb 2.	Korean J Ophthalmol		2017			0.0527917		doi: 10.3341/kjo.2017.31.1.9	28243018					0			0				0	0		doi: 10.3341/kjo.2017.31.1.9	Teo L, Woo YJ, Kim DK, Kim CY, Yoon JS., Surgical Outcomes of Porcine Acellular Dermis Graft in Anophthalmic Socket: Comparison with Oral Mucosa Graft. Korean J Ophthalmol. 2017
2611	Direct measurement of pressure-independent aqueous humour flow using iPerfusion.	Madekurozwa M, Reina-Torres E, Overby DR, Sherwood JM.	Exp Eye Res. 2017 Sep;162:129-138. doi: 10.1016/j.exer.2017.07.008. Epub 2017 Jul 16.	Exp Eye Res		2017			0.0528158		doi: 10.1016/j.exer.2017.07.008	28720436					0			0				0	0		doi: 10.1016/j.exer.2017.07.008	Madekurozwa M, Reina-Torres E, Overby DR, Sherwood JM., Direct measurement of pressure-independent aqueous humour flow using iPerfusion. Exp Eye Res. 2017
1123	Changes in Macular Retinal Layers and Peripapillary Nerve Fiber Layer Thickness after 577-nm Pattern Scanning Laser in Patients with Diabetic Retinopathy.	Shin JS, Lee YH.	Korean J Ophthalmol. 2017 Dec;31(6):497-507. doi: 10.3341/kjo.2016.0108. Epub 2017 Nov 30.	Korean J Ophthalmol		2017			0.0528891		doi: 10.3341/kjo.2016.0108	29022292					0			0				0	0		doi: 10.3341/kjo.2016.0108	Shin JS, Lee YH., Changes in Macular Retinal Layers and Peripapillary Nerve Fiber Layer Thickness after 577-nm Pattern Scanning Laser in Patients with Diabetic Retinopathy. Korean J Ophthalmol. 2017
6373	Vascular risk factors are associated with retinal arteriolar narrowing and venular widening in children and adolescents with type 1 diabetes.	Keel S, Itsiopoulos C, Koklanis K, Vukicevic M, Cameron F, Brazionis L.	J Pediatr Endocrinol Metab. 2017 Mar 1;30(3):301-309. doi: 10.1515/jpem-2016-0398.	J Pediatr Endocrinol Metab		2017			0.0529424		doi: 10.1515/jpem-2016-0398	28222036					0			0				0	0		doi: 10.1515/jpem-2016-0398	Keel S, Itsiopoulos C, Koklanis K, Vukicevic M, Cameron F, Brazionis L., Vascular risk factors are associated with retinal arteriolar narrowing and venular widening in children and adolescents with type 1 diabetes. J Pediatr Endocrinol Metab. 2017
9352	A Rare Central Nervous System Fungal Infection Resulting from Brown Heroin Use.	Melnychuk EM, Sole DP.	J Emerg Med. 2017 Mar;52(3):314-317. doi: 10.1016/j.jemermed.2016.09.011. Epub 2016 Oct 8.	J Emerg Med		2017			0.052969		doi: 10.1016/j.jemermed.2016.09.011	27727033					0			0				0	0		doi: 10.1016/j.jemermed.2016.09.011	Melnychuk EM, Sole DP., A Rare Central Nervous System Fungal Infection Resulting from Brown Heroin Use. J Emerg Med. 2017
4905	A PC-based shutter glasses controller for visual stimulation using multithreading in LabWindows/CVI.	Gramatikov I, Simons K, Guyton D, Gramatikov B.	Comput Methods Programs Biomed. 2017 May;143:151-158. doi: 10.1016/j.cmpb.2017.03.008. Epub 2017 Mar 10.	Comput Methods Programs Biomed		2017			0.0532708		doi: 10.1016/j.cmpb.2017.03.008	28391813					0			0				0	0		doi: 10.1016/j.cmpb.2017.03.008	Gramatikov I, Simons K, Guyton D, Gramatikov B., A PC-based shutter glasses controller for visual stimulation using multithreading in LabWindows/CVI. Comput Methods Programs Biomed. 2017
2977	Coloured overlays and precision-tinted lenses: poor repeatability in a sample of adults and children diagnosed with visual stress	Suttle CM, Barbur J, Conway ML.	Ophthalmic Physiol Opt. 2017 Jul;37(4):542-548. doi: 10.1111/opo.12389. Erratum in: Ophthalmic Physiol Opt. 2017 Sep;37(5):629.	Ophthalmic Physiol Opt		2017			0.0533328		doi: 10.1111/opo.12389	28656668					0			0				0	0		doi: 10.1111/opo.12389	Suttle CM, Barbur J, Conway ML., Coloured overlays and precision-tinted lenses: poor repeatability in a sample of adults and children diagnosed with visual stress Ophthalmic Physiol Opt. 2017
7756	Impact of Combination Glaucoma Therapies on β-Blocker Exposure.	Xu K, Campbell EL, Gill SS, Nesdole R, Campbell RJ.	J Glaucoma. 2017 Feb;26(2):e107-e109. doi: 10.1097/IJG.0000000000000500.	J Glaucoma		2017			0.053447		doi: 10.1097/IJG.0000000000000500	28059862					0			0				0	0		doi: 10.1097/IJG.0000000000000500	Xu K, Campbell EL, Gill SS, Nesdole R, Campbell RJ., Impact of Combination Glaucoma Therapies on β-Blocker Exposure. J Glaucoma. 2017
3652	Therapies for Macular Edema Associated with Branch Retinal Vein Occlusion: A Report by the American Academy of Ophthalmology.	Ehlers JP, Kim SJ, Yeh S, Thorne JE, Mruthyunjaya P, Schoenberger SD, Bakri SJ.	Ophthalmology. 2017 Sep;124(9):1412-1423. doi: 10.1016/j.ophtha.2017.03.060. Epub 2017 May 24.	Ophthalmology		2017			0.0536017		doi: 10.1016/j.ophtha.2017.03.060	28551163					0			0				0	0		doi: 10.1016/j.ophtha.2017.03.060	Ehlers JP, Kim SJ, Yeh S, Thorne JE, Mruthyunjaya P, Schoenberger SD, Bakri SJ., Therapies for Macular Edema Associated with Branch Retinal Vein Occlusion: A Report by the American Academy of Ophthalmology. Ophthalmology. 2017
9139	Collagen XVIII in tissue homeostasis and dysregulation - Lessons learned from model organisms and human patients.	Heljasvaara R, Aikio M, Ruotsalainen H, Pihlajaniemi T.	Matrix Biol. 2017 Jan;57-58:55-75. doi: 10.1016/j.matbio.2016.10.002. Epub 2016 Oct 13. Review.	Matrix Biol		2017			0.0538683		doi: 10.1016/j.matbio.2016.10.002	27746220					0			0				0	0		doi: 10.1016/j.matbio.2016.10.002	Heljasvaara R, Aikio M, Ruotsalainen H, Pihlajaniemi T., Collagen XVIII in tissue homeostasis and dysregulation - Lessons learned from model organisms and human patients. Matrix Biol. 2017
2741	Intracorneal melatonin delivery using 2-hydroxypropyl-β-cyclodextrin ophthalmic solution for granular corneal dystrophy type 2.	Ahn JH, Kim HD, Abuzar SM, Lee JY, Jin SE, Kim EK, Hwang SJ.	Int J Pharm. 2017 Aug 30;529(1-2):608-616. doi: 10.1016/j.ijpharm.2017.07.016. Epub 2017 Jul 8.	Int J Pharm		2017			0.0539126		doi: 10.1016/j.ijpharm.2017.07.016	28694094					0			0				0	0		doi: 10.1016/j.ijpharm.2017.07.016	Ahn JH, Kim HD, Abuzar SM, Lee JY, Jin SE, Kim EK, Hwang SJ., Intracorneal melatonin delivery using 2-hydroxypropyl-β-cyclodextrin ophthalmic solution for granular corneal dystrophy type 2. Int J Pharm. 2017
4222	Iris Clip Lens Implantation with Novel Approach for Aphakia After Previous Filtration Surgery.	Hammer A, Wolfensberger TJ.	Klin Monbl Augenheilkd. 2017 Apr;234(4):432-435. doi: 10.1055/s-0043-104430. Epub 2017 May 3.	Klin Monbl Augenheilkd		2017			0.0539506		doi: 10.1055/s-0043-104430	28470642					0			0				0	0		doi: 10.1055/s-0043-104430	Hammer A, Wolfensberger TJ., Iris Clip Lens Implantation with Novel Approach for Aphakia After Previous Filtration Surgery. Klin Monbl Augenheilkd. 2017
10171	Precut cornea for Descemet's stripping endothelial keratoplasty: experience at a single eye bank.	Mohamed A, Chaurasia S, Chandragiri V, Kandhibanda S, Gunnam S, Garg P.	Int Ophthalmol. 2017 Jun;37(3):525-529. doi: 10.1007/s10792-016-0297-1. Epub 2016 Jul 20.	Int Ophthalmol		2017			0.0539907		doi: 10.1007/s10792-016-0297-1	27440188					0			0				0	0		doi: 10.1007/s10792-016-0297-1	Mohamed A, Chaurasia S, Chandragiri V, Kandhibanda S, Gunnam S, Garg P., Precut cornea for Descemet's stripping endothelial keratoplasty: experience at a single eye bank. Int Ophthalmol. 2017
3981	Swept-Source OCT Visualization of Macular Hole Closure in Gas-Filled Eyes.	Li DQ, Choudhry N.	Ophthalmic Surg Lasers Imaging Retina. 2017 May 1;48(5):392-398. doi: 10.3928/23258160-20170428-05.	Ophthalmic Surg Lasers Imaging Retina		2017			0.0539978		doi: 10.3928/23258160-20170428-05	28499050					0			0				0	0		doi: 10.3928/23258160-20170428-05	Li DQ, Choudhry N., Swept-Source OCT Visualization of Macular Hole Closure in Gas-Filled Eyes. Ophthalmic Surg Lasers Imaging Retina. 2017
4198	Association of Glaucoma-Susceptible Genes to Regional Circumpapillary Retinal Nerve Fiber Layer Thickness and Visual Field Defects.	Yoshikawa M, Nakanishi H, Yamashiro K, Miyake M, Akagi T, Gotoh N, Ikeda HO, Suda K, Yamada H, Hasegawa T, Iida Y, Yamada R, Matsuda F, Yoshimura N; Nagahama Study Group..	Invest Ophthalmol Vis Sci. 2017 May 1;58(5):2510-2519. doi: 10.1167/iovs.16-20797.	Invest Ophthalmol Vis Sci		2017			0.0542835		doi: 10.1167/iovs.16-20797	28472212					0			0				0	0		doi: 10.1167/iovs.16-20797	Yoshikawa M, Nakanishi H, Yamashiro K, Miyake M, Akagi T, Gotoh N, Ikeda HO, Suda K, Yamada H, Hasegawa T, Iida Y, Yamada R, Matsuda F, Yoshimura N; Nagahama Study Group.., Association of Glaucoma-Susceptible Genes to Regional Circumpapillary Retinal Nerve Fiber Layer Thickness and Visual Field Defects. Invest Ophthalmol Vis Sci. 2017
8154	Evaluation of ovarian reserve using anti-müllerian hormone and antral follicle count in Sjögren's syndrome: Preliminary study.	Karakus S, Sahin A, Durmaz Y, Aydin H, Yildiz C, Akkar O, Dogan M, Cengiz A, Cetin M, Cetin A.	J Obstet Gynaecol Res. 2017 Feb;43(2):303-307. doi: 10.1111/jog.13216. Epub 2016 Dec 17.	J Obstet Gynaecol Res		2017			0.0543054		doi: 10.1111/jog.13216	27987339					0			0				0	0		doi: 10.1111/jog.13216	Karakus S, Sahin A, Durmaz Y, Aydin H, Yildiz C, Akkar O, Dogan M, Cengiz A, Cetin M, Cetin A., Evaluation of ovarian reserve using anti-müllerian hormone and antral follicle count in Sjögren's syndrome: Preliminary study. J Obstet Gynaecol Res. 2017
5357	Innovations in glaucoma surgery from Dr. Rajendra Prasad Centre for Ophthalmic Sciences.	Dada T, Midha N, Shah P, Sidhu T, Angmo D, Sihota R.	Indian J Ophthalmol. 2017 Feb;65(2):103-108. doi: 10.4103/ijo.IJO_865_16. Review.	Indian J Ophthalmol		2017			0.0543481		doi: 10.4103/ijo.IJO_865_16	28345564					0			0				0	0		doi: 10.4103/ijo.IJO_865_16	Dada T, Midha N, Shah P, Sidhu T, Angmo D, Sihota R., Innovations in glaucoma surgery from Dr. Rajendra Prasad Centre for Ophthalmic Sciences. Indian J Ophthalmol. 2017
2758	Inadvertent Cyclodialysis Cleft and Hypotony Following Ab-Interno Trabeculotomy Using the Trabectome Device Requiring Surgical Repair.	Berk TA, An JA, Ahmed IIK.	J Glaucoma. 2017 Aug;26(8):742-746. doi: 10.1097/IJG.0000000000000719.	J Glaucoma		2017			0.0545642		doi: 10.1097/IJG.0000000000000719	28692596					0			0				0	0		doi: 10.1097/IJG.0000000000000719	Berk TA, An JA, Ahmed IIK., Inadvertent Cyclodialysis Cleft and Hypotony Following Ab-Interno Trabeculotomy Using the Trabectome Device Requiring Surgical Repair. J Glaucoma. 2017
6771	Comparison of the efficacy of surgical clipping and embolization for oculomotor nerve palsy due to a posterior communicating artery aneurysm.	Gao G, Gu DQ, Zhang Y, Yu J, Chen Y, Chao YJ, Wei JJ, Fu XM, Niu CS.	Eur Rev Med Pharmacol Sci. 2017 Jan;21(2):292-296.	Eur Rev Med Pharmacol Sci		2017			0.0547238		#VALUE!	28165559					0			0				0	0		#VALUE!	Gao G, Gu DQ, Zhang Y, Yu J, Chen Y, Chao YJ, Wei JJ, Fu XM, Niu CS., Comparison of the efficacy of surgical clipping and embolization for oculomotor nerve palsy due to a posterior communicating artery aneurysm. Eur Rev Med Pharmacol Sci. 2017
4150	You are what you eat: ophthalmological manifestations of severe B(12) deficiency.	Azenha C, Costa JF, Fonseca P.	BMJ Case Rep. 2017 May 6;2017. pii: bcr-2016-218558. doi: 10.1136/bcr-2016-218558.	BMJ Case Rep		2017			0.0547293		doi: 10.1136/bcr-2016-218558	28478387					0			0				0	0		doi: 10.1136/bcr-2016-218558	Azenha C, Costa JF, Fonseca P., You are what you eat: ophthalmological manifestations of severe B(12) deficiency. BMJ Case Rep. 2017
8993	Vertical asymmetry of lamina cribrosa tilt angles using wide bandwidth, femtosecond mode-locked laser OCT; effect of myopia and glaucoma.	Shoji T, Kuroda H, Suzuki M, Ibuki H, Araie M, Yoneya S.	Graefes Arch Clin Exp Ophthalmol. 2017 Jan;255(1):197-205. doi: 10.1007/s00417-016-3524-6. Epub 2016 Oct 28.	Graefes Arch Clin Exp Ophthalmol		2017			0.0547309		doi: 10.1007/s00417-016-3524-6	27796669					0			0				0	0		doi: 10.1007/s00417-016-3524-6	Shoji T, Kuroda H, Suzuki M, Ibuki H, Araie M, Yoneya S., Vertical asymmetry of lamina cribrosa tilt angles using wide bandwidth, femtosecond mode-locked laser OCT; effect of myopia and glaucoma. Graefes Arch Clin Exp Ophthalmol. 2017
5095	Effect of glaucoma implant surgery on intraocular pressure reduction, flare count, anterior chamber depth, and corneal endothelium in primary open-angle glaucoma.	Ishida K, Moroto N, Murata K, Yamamoto T.	Jpn J Ophthalmol. 2017 Jul;61(4):334-346. doi: 10.1007/s10384-017-0512-2. Epub 2017 Apr 3. Erratum in: Jpn J Ophthalmol. 2018 Mar 12;:.	Jpn J Ophthalmol		2017			0.0547873		doi: 10.1007/s10384-017-0512-2	28374269					0			0				0	0		doi: 10.1007/s10384-017-0512-2	Ishida K, Moroto N, Murata K, Yamamoto T., Effect of glaucoma implant surgery on intraocular pressure reduction, flare count, anterior chamber depth, and corneal endothelium in primary open-angle glaucoma. Jpn J Ophthalmol. 2017
2422	Mechanical Modeling of a Keratoconic Cornea.	Perone JM, Conart JB, Bertaux PJ, Sujet-Perone N, Ouamara N, Sot M, Henry JJ.	Cornea. 2017 Oct;36(10):1263-1266. doi: 10.1097/ICO.0000000000001293.	Cornea		2017			0.0548432		doi: 10.1097/ICO.0000000000001293	28749895					0			0				0	0		doi: 10.1097/ICO.0000000000001293	Perone JM, Conart JB, Bertaux PJ, Sujet-Perone N, Ouamara N, Sot M, Henry JJ., Mechanical Modeling of a Keratoconic Cornea. Cornea. 2017
4255	Intravitreal Sustained-Release Steroid Implants for the Treatment of Macular Edema following Surgical Removal of Epiretinal Membranes.	Hattenbach LO, Springer-Wanner C, Hoerauf H, Callizo J, Jungmann S, Brauns T, Fulle G, Eichel S, Koss MJ, Kuhli-Hattenbach C.	Ophthalmologica. 2017;237(4):232-237. doi: 10.1159/000464259. Epub 2017 May 3.	Ophthalmologica		2017			0.0548927		doi: 10.1159/000464259	28463851					0			0				0	0		doi: 10.1159/000464259	Hattenbach LO, Springer-Wanner C, Hoerauf H, Callizo J, Jungmann S, Brauns T, Fulle G, Eichel S, Koss MJ, Kuhli-Hattenbach C., Intravitreal Sustained-Release Steroid Implants for the Treatment of Macular Edema following Surgical Removal of Epiretinal Membranes. Ophthalmologica. 2017
5003	Forkhead Box Protein P1 Is Dispensable for Retina but Essential for Lens Development.	Suzuki-Kerr H, Baba Y, Tsuhako A, Koso H, Dekker JD, Tucker HO, Kuribayashi H, Watanabe S.	Invest Ophthalmol Vis Sci. 2017 Apr 1;58(4):1916-1929. doi: 10.1167/iovs.16-20085.	Invest Ophthalmol Vis Sci		2017			0.0549216		doi: 10.1167/iovs.16-20085	28384713					0			0				0	0		doi: 10.1167/iovs.16-20085	Suzuki-Kerr H, Baba Y, Tsuhako A, Koso H, Dekker JD, Tucker HO, Kuribayashi H, Watanabe S., Forkhead Box Protein P1 Is Dispensable for Retina but Essential for Lens Development. Invest Ophthalmol Vis Sci. 2017
2956	Cataract and optic disk drusen in a patient with glycogenosis and di George syndrome: clinical and molecular report.	Allegrini D, Penco S, Pece A, Autelitano A, Montesano G, Paci S, Montanari C, Maver A, Peterlin B, Damante G, Rossetti L.	BMC Ophthalmol. 2017 Jun 28;17(1):107. doi: 10.1186/s12886-017-0499-y.	BMC Ophthalmol		2017			0.055008		doi: 10.1186/s12886-017-0499-y	28659124					0			0				0	0		doi: 10.1186/s12886-017-0499-y	Allegrini D, Penco S, Pece A, Autelitano A, Montesano G, Paci S, Montanari C, Maver A, Peterlin B, Damante G, Rossetti L., Cataract and optic disk drusen in a patient with glycogenosis and di George syndrome: clinical and molecular report. BMC Ophthalmol. 2017
935	Quantifying Microvascular Abnormalities With Increasing Severity of Diabetic Retinopathy Using Optical Coherence Tomography Angiography.	Nesper PL, Roberts PK, Onishi AC, Chai H, Liu L, Jampol LM, Fawzi AA.	Invest Ophthalmol Vis Sci. 2017 May 1;58(6):BIO307-BIO315. doi: 10.1167/iovs.17-21787.	Invest Ophthalmol Vis Sci		2017			0.0551083		doi: 10.1167/iovs.17-21787	29059262					0			0				0	0		doi: 10.1167/iovs.17-21787	Nesper PL, Roberts PK, Onishi AC, Chai H, Liu L, Jampol LM, Fawzi AA., Quantifying Microvascular Abnormalities With Increasing Severity of Diabetic Retinopathy Using Optical Coherence Tomography Angiography. Invest Ophthalmol Vis Sci. 2017
2639	Effects of Pathogenic Variations in the Human Rhodopsin Gene (hRHO) on the Predicted Accessibility for a Lead Candidate Ribozyme.	Froebel BR, Trujillo AJ, Sullivan JM.	Invest Ophthalmol Vis Sci. 2017 Jul 1;58(9):3576-3591. doi: 10.1167/iovs.16-20877.	Invest Ophthalmol Vis Sci		2017			0.0551226		doi: 10.1167/iovs.16-20877	28715844					0			0				0	0		doi: 10.1167/iovs.16-20877	Froebel BR, Trujillo AJ, Sullivan JM., Effects of Pathogenic Variations in the Human Rhodopsin Gene (hRHO) on the Predicted Accessibility for a Lead Candidate Ribozyme. Invest Ophthalmol Vis Sci. 2017
2928	Skeletal Muscle Channelopathies: Rare Disorders with Common Pediatric Symptoms.	Matthews E, Silwal A, Sud R, Hanna MG, Manzur AY, Muntoni F, Munot P.	J Pediatr. 2017 Sep;188:181-185.e6. doi: 10.1016/j.jpeds.2017.05.081. Epub 2017 Jun 26.	J Pediatr		2017			0.0551636		doi: 10.1016/j.jpeds.2017.05.081	28662944					0			0				0	0		doi: 10.1016/j.jpeds.2017.05.081	Matthews E, Silwal A, Sud R, Hanna MG, Manzur AY, Muntoni F, Munot P., Skeletal Muscle Channelopathies: Rare Disorders with Common Pediatric Symptoms. J Pediatr. 2017
5327	Memory-guided drawing training increases Granger causal influences from the perirhinal cortex to V1 in the blind.	Cacciamani L, Likova LT.	Neurobiol Learn Mem. 2017 May;141:101-107. doi: 10.1016/j.nlm.2017.03.013. Epub 2017 Mar 24.	Neurobiol Learn Mem		2017			0.0553377		doi: 10.1016/j.nlm.2017.03.013	28347878					0			0				0	0		doi: 10.1016/j.nlm.2017.03.013	Cacciamani L, Likova LT., Memory-guided drawing training increases Granger causal influences from the perirhinal cortex to V1 in the blind. Neurobiol Learn Mem. 2017
2243	Activated Retinal Pigment Epithelium, an Optical Coherence Tomography Biomarker for Progression in Age-Related Macular Degeneration.	Curcio CA, Zanzottera EC, Ach T, Balaratnasingam C, Freund KB.	Invest Ophthalmol Vis Sci. 2017 May 1;58(6):BIO211-BIO226. doi: 10.1167/iovs.17-21872.	Invest Ophthalmol Vis Sci		2017			0.0553766		doi: 10.1167/iovs.17-21872	28785769					0			0				0	0		doi: 10.1167/iovs.17-21872	Curcio CA, Zanzottera EC, Ach T, Balaratnasingam C, Freund KB., Activated Retinal Pigment Epithelium, an Optical Coherence Tomography Biomarker for Progression in Age-Related Macular Degeneration. Invest Ophthalmol Vis Sci. 2017
10761	Diagnosis of Choroidal Melanoma in Dense Asteroid Hyalosis.	Motiani MV, McCannel CA, Almanzor R, McCannel TA.	Semin Ophthalmol. 2017;32(2):257-259. doi: 10.3109/08820538.2015.1053627. Epub 2016 Apr 8.	Semin Ophthalmol		2017			0.0554607		doi: 10.3109/08820538.2015.1053627	27058861					0			0				0	0		doi: 10.3109/08820538.2015.1053627	Motiani MV, McCannel CA, Almanzor R, McCannel TA., Diagnosis of Choroidal Melanoma in Dense Asteroid Hyalosis. Semin Ophthalmol. 2017
5738	White matter and cortical changes in atypical parkinsonisms: A multimodal quantitative MR study.	Zanigni S, Evangelisti S, Testa C, Manners DN, Calandra-Buonaura G, Guarino M, Gabellini A, Gramegna LL, Giannini G, Sambati L, Cortelli P, Lodi R, Tonon C.	Parkinsonism Relat Disord. 2017 Jun;39:44-51. doi: 10.1016/j.parkreldis.2017.03.001. Epub 2017 Mar 6.	Parkinsonism Relat Disord		2017			0.0555527		doi: 10.1016/j.parkreldis.2017.03.001	28291592					0			0				0	0		doi: 10.1016/j.parkreldis.2017.03.001	Zanigni S, Evangelisti S, Testa C, Manners DN, Calandra-Buonaura G, Guarino M, Gabellini A, Gramegna LL, Giannini G, Sambati L, Cortelli P, Lodi R, Tonon C., White matter and cortical changes in atypical parkinsonisms: A multimodal quantitative MR study. Parkinsonism Relat Disord. 2017
4818	Phospholipidomic Studies in Human Cornea From Climatic Droplet Keratopathy.	Suarez MF, Piqueras MC, Correa L, Esposito E, Barros MF, Bhattacharya SK, Urrets-Zavalia JA, Serra HM.	J Cell Biochem. 2017 Nov;118(11):3920-3931. doi: 10.1002/jcb.26045. Epub 2017 May 23.	J Cell Biochem		2017			0.0557135		doi: 10.1002/jcb.26045	28401586					0			0				0	0		doi: 10.1002/jcb.26045	Suarez MF, Piqueras MC, Correa L, Esposito E, Barros MF, Bhattacharya SK, Urrets-Zavalia JA, Serra HM., Phospholipidomic Studies in Human Cornea From Climatic Droplet Keratopathy. J Cell Biochem. 2017
10363	Risk Factors for Ocular Burn Injuries Requiring Surgery.	Cabalag MS, Wasiak J, Syed Q, Paul E, Hall AJ, Cleland H.	J Burn Care Res. 2017 Mar/Apr;38(2):71-77. doi: 10.1097/BCR.0000000000000390.	J Burn Care Res		2017			0.0558919		doi: 10.1097/BCR.0000000000000390	27355655					0			0				0	0		doi: 10.1097/BCR.0000000000000390	Cabalag MS, Wasiak J, Syed Q, Paul E, Hall AJ, Cleland H., Risk Factors for Ocular Burn Injuries Requiring Surgery. J Burn Care Res. 2017
10159	Common variants of HNF1A gene are associated with diabetic retinopathy and poor glycemic control in normal-weight Japanese subjects with type 2 diabetes mellitus.	Morita K, Saruwatari J, Tanaka T, Oniki K, Kajiwara A, Miyazaki H, Yoshida A, Jinnouchi H, Nakagawa K.	J Diabetes Complications. 2017 Feb;31(2):483-488. doi: 10.1016/j.jdiacomp.2016.06.007. Epub 2016 Jun 14.	J Diabetes Complications		2017			0.0559053		doi: 10.1016/j.jdiacomp.2016.06.007	27445006					0			0				0	0		doi: 10.1016/j.jdiacomp.2016.06.007	Morita K, Saruwatari J, Tanaka T, Oniki K, Kajiwara A, Miyazaki H, Yoshida A, Jinnouchi H, Nakagawa K., Common variants of HNF1A gene are associated with diabetic retinopathy and poor glycemic control in normal-weight Japanese subjects with type 2 diabetes mellitus. J Diabetes Complications. 2017
9146	Automatic Identification of Pathology-Distorted Retinal Layer Boundaries Using SD-OCT Imaging.	Hussain MA, Bhuiyan A, Turpin A, Luu CD, Smith RT, Guymer RH, Kotagiri R.	IEEE Trans Biomed Eng. 2017 Jul;64(7):1638-1649. doi: 10.1109/TBME.2016.2619120. Epub 2016 Oct 19.	IEEE Trans Biomed Eng		2017			0.0559875		doi: 10.1109/TBME.2016.2619120	27775509					0			0				0	0		doi: 10.1109/TBME.2016.2619120	Hussain MA, Bhuiyan A, Turpin A, Luu CD, Smith RT, Guymer RH, Kotagiri R., Automatic Identification of Pathology-Distorted Retinal Layer Boundaries Using SD-OCT Imaging. IEEE Trans Biomed Eng. 2017
6713	Metabolic changes in normal-appearing white matter in patients with neuromyelitis optica and multiple sclerosis: a comparative magnetic resonance spectroscopy study.	Duan Y, Liu Z, Liu Y, Huang J, Ren Z, Sun Z, Chen H, Dong H, Ye J, Li K.	Acta Radiol. 2017 Sep;58(9):1132-1137. doi: 10.1177/0284185116683575. Epub 2017 Feb 7.	Acta Radiol		2017			0.0562236		doi: 10.1177/0284185116683575	28173728					0			0				0	0		doi: 10.1177/0284185116683575	Duan Y, Liu Z, Liu Y, Huang J, Ren Z, Sun Z, Chen H, Dong H, Ye J, Li K., Metabolic changes in normal-appearing white matter in patients with neuromyelitis optica and multiple sclerosis: a comparative magnetic resonance spectroscopy study. Acta Radiol. 2017
8073	Early Reoperation Rate, Complication, and Outcomes in Resident-performed Glaucoma Surgery.	Hsia YC, Lee JH, Cui QN, Stewart JM, Naseri A, Porco T, Stamper RL, Han Y.	J Glaucoma. 2017 Feb;26(2):87-92. doi: 10.1097/IJG.0000000000000533.	J Glaucoma		2017			0.0563894		doi: 10.1097/IJG.0000000000000533	28002187					0			0				0	0		doi: 10.1097/IJG.0000000000000533	Hsia YC, Lee JH, Cui QN, Stewart JM, Naseri A, Porco T, Stamper RL, Han Y., Early Reoperation Rate, Complication, and Outcomes in Resident-performed Glaucoma Surgery. J Glaucoma. 2017
108	The best of the best: a review of select oculoplastic case series published in 2015.	Temnogorod J, Shinder R.	Digit J Ophthalmol. 2017 Nov 21;23(4):1-3. doi: 10.5693/djo.01.2017.09.001. eCollection 2017. Review.	Digit J Ophthalmol		2017			0.0564749		doi: 10.5693/djo.01.2017.09.001	29403332					0			0				0	0		doi: 10.5693/djo.01.2017.09.001	Temnogorod J, Shinder R., The best of the best: a review of select oculoplastic case series published in 2015. Digit J Ophthalmol. 2017
8827	SPONTANEOUS CLOSURE OF A MACULAR HOLE AFTER FOUR FAILED VITRECTOMIES IN THE SETTING OF NF-1.	Wannamaker KW, Sharpe RA, Kylstra JA.	Retin Cases Brief Rep. 2018 Winter;12(1):36-38. doi: 10.1097/ICB.0000000000000408.	Retin Cases Brief Rep		2018			0.0565471		doi: 10.1097/ICB.0000000000000408	27831970					0			0				0	0		doi: 10.1097/ICB.0000000000000408	Wannamaker KW, Sharpe RA, Kylstra JA., SPONTANEOUS CLOSURE OF A MACULAR HOLE AFTER FOUR FAILED VITRECTOMIES IN THE SETTING OF NF-1. Retin Cases Brief Rep. 2018
4975	Clinical efficacy of anti-VEGF medications for central serous chorioretinopathy: a meta-analysis.	Ji S, Wei Y, Chen J, Tang S.	Int J Clin Pharm. 2017 Jun;39(3):514-521. doi: 10.1007/s11096-017-0460-4. Epub 2017 Apr 6. Review.	Int J Clin Pharm		2017			0.0566018		doi: 10.1007/s11096-017-0460-4	28386700					0			0				0	0		doi: 10.1007/s11096-017-0460-4	Ji S, Wei Y, Chen J, Tang S., Clinical efficacy of anti-VEGF medications for central serous chorioretinopathy: a meta-analysis. Int J Clin Pharm. 2017
9016	Primary Gliosarcoma of the Optic Nerve: A Unique Adult Optic Pathway Glioma.	Cimino PJ, Sychev YV, Gonzalez-Cuyar LF, Mudumbai RC, Keene CD.	Ophthal Plast Reconstr Surg. 2017 Jul/Aug;33(4):e88-e92. doi: 10.1097/IOP.0000000000000798.	Ophthal Plast Reconstr Surg		2017			0.0566212		doi: 10.1097/IOP.0000000000000798	27792048					0			0				0	0		doi: 10.1097/IOP.0000000000000798	Cimino PJ, Sychev YV, Gonzalez-Cuyar LF, Mudumbai RC, Keene CD., Primary Gliosarcoma of the Optic Nerve: A Unique Adult Optic Pathway Glioma. Ophthal Plast Reconstr Surg. 2017
6793	Practice Patterns After Acute Embolic Retinal Artery Occlusion.	Abel AS, Suresh S, Hussein HM, Carpenter AF, Montezuma SR, Lee MS.	Asia Pac J Ophthalmol (Phila). 2017 Jan-Feb;6(1):37-39. doi: 10.22608/APO.201690.	Asia Pac J Ophthalmol (Phila)		2017			0.056733		doi: 10.22608/APO.201690	28161924					0			0				0	0		doi: 10.22608/APO.201690	Abel AS, Suresh S, Hussein HM, Carpenter AF, Montezuma SR, Lee MS., Practice Patterns After Acute Embolic Retinal Artery Occlusion. Asia Pac J Ophthalmol (Phila). 2017
6061	Personalized plasma-based medicine to treat age-related diseases.	Anitua E, Troya M, Zalduendo M, Orive G.	Mater Sci Eng C Mater Biol Appl. 2017 May 1;74:459-464. doi: 10.1016/j.msec.2016.12.040. Epub 2016 Dec 13. Review.	Mater Sci Eng C Mater Biol Appl		2017			0.056763		doi: 10.1016/j.msec.2016.12.040	28254317					0			0				0	0		doi: 10.1016/j.msec.2016.12.040	Anitua E, Troya M, Zalduendo M, Orive G., Personalized plasma-based medicine to treat age-related diseases. Mater Sci Eng C Mater Biol Appl. 2017
1840	CT Features of Vasculitides Based on the 2012 International Chapel Hill Consensus Conference Revised Classification.	Hur JH, Chun EJ, Kwag HJ, Yoo JY, Kim HY, Kim JJ, Lee KW.	Korean J Radiol. 2017 Sep-Oct;18(5):786-798. doi: 10.3348/kjr.2017.18.5.786. Epub 2017 Jul 17.	Korean J Radiol		2017			0.0568182		doi: 10.3348/kjr.2017.18.5.786	28860896					0			0				0	0		doi: 10.3348/kjr.2017.18.5.786	Hur JH, Chun EJ, Kwag HJ, Yoo JY, Kim HY, Kim JJ, Lee KW., CT Features of Vasculitides Based on the 2012 International Chapel Hill Consensus Conference Revised Classification. Korean J Radiol. 2017
4100	Higher Numbers of Hyperreflective Foci Seen in the Vitreous on Spectral-Domain Optical Coherence Tomographic Images in Eyes with More Severe Diabetic Retinopathy.	Mizukami T, Hotta Y, Katai N.	Ophthalmologica. 2017;238(1-2):74-80. doi: 10.1159/000473886. Epub 2017 May 10.	Ophthalmologica		2017			0.0570011		doi: 10.1159/000473886	28486219					0			0				0	0		doi: 10.1159/000473886	Mizukami T, Hotta Y, Katai N., Higher Numbers of Hyperreflective Foci Seen in the Vitreous on Spectral-Domain Optical Coherence Tomographic Images in Eyes with More Severe Diabetic Retinopathy. Ophthalmologica. 2017
4474	Efficacy and Safety of 23-Gauge Pars Plana Vitrectomy/Silicone Oil Tamponade Combination for Treatment of Pediatric Post-Traumatic Endophthalmitis.	Jin W, Xu Y, Wang W, Xing Y, Yang A.	Curr Eye Res. 2017 Aug;42(8):1143-1148. doi: 10.1080/02713683.2017.1297460. Epub 2017 Apr 25.	Curr Eye Res		2017			0.0570801		doi: 10.1080/02713683.2017.1297460	28441071					0			0				0	0		doi: 10.1080/02713683.2017.1297460	Jin W, Xu Y, Wang W, Xing Y, Yang A., Efficacy and Safety of 23-Gauge Pars Plana Vitrectomy/Silicone Oil Tamponade Combination for Treatment of Pediatric Post-Traumatic Endophthalmitis. Curr Eye Res. 2017
3117	ASSOCIATION BETWEEN VISUAL FUNCTION AND SUBRETINAL DRUSENOID DEPOSITS IN NORMAL AND EARLY AGE-RELATED MACULAR DEGENERATION EYES.	Neely D, Zarubina AV, Clark ME, Huisingh CE, Jackson GR, Zhang Y, McGwin G Jr, Curcio CA, Owsley C.	Retina. 2017 Jul;37(7):1329-1336. doi: 10.1097/IAE.0000000000001454.	Retina		2017			0.0572812		doi: 10.1097/IAE.0000000000001454	28633153					0			0				0	0		doi: 10.1097/IAE.0000000000001454	Neely D, Zarubina AV, Clark ME, Huisingh CE, Jackson GR, Zhang Y, McGwin G Jr, Curcio CA, Owsley C., ASSOCIATION BETWEEN VISUAL FUNCTION AND SUBRETINAL DRUSENOID DEPOSITS IN NORMAL AND EARLY AGE-RELATED MACULAR DEGENERATION EYES. Retina. 2017
7808	Clinical associations with venous thromboembolism in anti-neutrophil cytoplasm antibody-associated vasculitides.	Kronbichler A, Leierer J, Leierer G, Mayer G, Casian A, Höglund P, Westman K, Jayne D; European Vasculitis Society..	Rheumatology (Oxford). 2017 May 1;56(5):704-708. doi: 10.1093/rheumatology/kew465.	Rheumatology (Oxford)		2017			0.0573029		doi: 10.1093/rheumatology/kew465	28053275					0			0				0	0		doi: 10.1093/rheumatology/kew465	Kronbichler A, Leierer J, Leierer G, Mayer G, Casian A, Höglund P, Westman K, Jayne D; European Vasculitis Society.., Clinical associations with venous thromboembolism in anti-neutrophil cytoplasm antibody-associated vasculitides. Rheumatology (Oxford). 2017
8271	Evaluation of factors affecting visual acuity after Descemet stripping automated endothelial keratoplasty.	Amano S, Setogawa A, Inoue K.	Jpn J Ophthalmol. 2017 Mar;61(2):137-141. doi: 10.1007/s10384-016-0491-8. Epub 2016 Dec 10.	Jpn J Ophthalmol		2017			0.0574043		doi: 10.1007/s10384-016-0491-8	27943090					0			0				0	0		doi: 10.1007/s10384-016-0491-8	Amano S, Setogawa A, Inoue K., Evaluation of factors affecting visual acuity after Descemet stripping automated endothelial keratoplasty. Jpn J Ophthalmol. 2017
512	Macrothrombocytopenia With Congenital Bilateral Cataracts: A Phenotype of MYH9 Disorder With Exon 24 Indel Mutations.	Aoki T, Kunishima S, Yamashita Y, Minamitani K, Ota S.	J Pediatr Hematol Oncol. 2018 Jan;40(1):76-78. doi: 10.1097/MPH.0000000000000998.	J Pediatr Hematol Oncol		2018			0.0574839		doi: 10.1097/MPH.0000000000000998	29200148					0			0				0	0		doi: 10.1097/MPH.0000000000000998	Aoki T, Kunishima S, Yamashita Y, Minamitani K, Ota S., Macrothrombocytopenia With Congenital Bilateral Cataracts: A Phenotype of MYH9 Disorder With Exon 24 Indel Mutations. J Pediatr Hematol Oncol. 2018
9204	Clinical investigation of new glaucoma procedures.	Vinod K, Gedde SJ.	Curr Opin Ophthalmol. 2017 Mar;28(2):187-193. doi: 10.1097/ICU.0000000000000336. Review.	Curr Opin Ophthalmol		2017			0.0577041		doi: 10.1097/ICU.0000000000000336	27764024					0			0				0	0		doi: 10.1097/ICU.0000000000000336	Vinod K, Gedde SJ., Clinical investigation of new glaucoma procedures. Curr Opin Ophthalmol. 2017
6550	Technique for Infant Intravitreal Injection in Treatment of Retinopathy of Prematurity.	Wright LM, Vrcek IM, Scribbick FW 3rd, Chang EY, Harper CA 3rd.	Retina. 2017 Nov;37(11):2188-2190. doi: 10.1097/IAE.0000000000001561. No abstract available.	Retina		2017			0.0577417		doi: 10.1097/IAE.0000000000001561	28196051					0			0				0	0		doi: 10.1097/IAE.0000000000001561	Wright LM, Vrcek IM, Scribbick FW 3rd, Chang EY, Harper CA 3rd., Technique for Infant Intravitreal Injection in Treatment of Retinopathy of Prematurity. Retina. 2017
10589	Human tear proteomics and peptidomics in ophthalmology: Toward the translation of proteomic biomarkers into clinical practice.	Azkargorta M, Soria J, Acera A, Iloro I, Elortza F.	J Proteomics. 2017 Jan 6;150:359-367. doi: 10.1016/j.jprot.2016.05.006. Epub 2016 May 13. Review.	J Proteomics		2017			0.0579125		doi: 10.1016/j.jprot.2016.05.006	27184738					0			0				0	0		doi: 10.1016/j.jprot.2016.05.006	Azkargorta M, Soria J, Acera A, Iloro I, Elortza F., Human tear proteomics and peptidomics in ophthalmology: Toward the translation of proteomic biomarkers into clinical practice. J Proteomics. 2017
4744	A wellness platform for stereoscopic 3D video systems using EEG-based visual discomfort evaluation technology.	Kang MK, Cho H, Park HM, Jun SC, Yoon KJ.	Appl Ergon. 2017 Jul;62:158-167. doi: 10.1016/j.apergo.2017.02.022. Epub 2017 Apr 6.	Appl Ergon		2017			0.0580035		doi: 10.1016/j.apergo.2017.02.022	28411726					0			0				0	0		doi: 10.1016/j.apergo.2017.02.022	Kang MK, Cho H, Park HM, Jun SC, Yoon KJ., A wellness platform for stereoscopic 3D video systems using EEG-based visual discomfort evaluation technology. Appl Ergon. 2017
5862	Human Leukocyte Antigen Class I Genes Associated With Stevens-Johnson Syndrome and Severe Ocular Complications Following Use of Cold Medicine in a Brazilian Population.	Wakamatsu TH, Ueta M, Tokunaga K, Okada Y, Loureiro RR, Costa KA, Sallum JMF, Milhomens JA, Inoue C, Sotozono C, Gomes JÁP, Kinoshita S.	JAMA Ophthalmol. 2017 Apr 1;135(4):355-360. doi: 10.1001/jamaophthalmol.2017.0074.	JAMA Ophthalmol		2017			0.0584231		doi: 10.1001/jamaophthalmol.2017.0074	28278336					0			0				0	0		doi: 10.1001/jamaophthalmol.2017.0074	Wakamatsu TH, Ueta M, Tokunaga K, Okada Y, Loureiro RR, Costa KA, Sallum JMF, Milhomens JA, Inoue C, Sotozono C, Gomes JÁP, Kinoshita S., Human Leukocyte Antigen Class I Genes Associated With Stevens-Johnson Syndrome and Severe Ocular Complications Following Use of Cold Medicine in a Brazilian Population. JAMA Ophthalmol. 2017
919	Long Non-Coding RNA-MALAT1 Mediates Retinal Ganglion Cell Apoptosis Through the PI3K/Akt Signaling Pathway in Rats with Glaucoma.	Li HB, You QS, Xu LX, Sun LX, Abdul Majid AS, Xia XB, Ji D.	Cell Physiol Biochem. 2017;43(5):2117-2132. doi: 10.1159/000484231. Epub 2017 Oct 24.	Cell Physiol Biochem		2017			0.0586171		doi: 10.1159/000484231	29065394					0			0				0	0		doi: 10.1159/000484231	Li HB, You QS, Xu LX, Sun LX, Abdul Majid AS, Xia XB, Ji D., Long Non-Coding RNA-MALAT1 Mediates Retinal Ganglion Cell Apoptosis Through the PI3K/Akt Signaling Pathway in Rats with Glaucoma. Cell Physiol Biochem. 2017
3605	Clinically Focused Molecular Investigation of 1000 Consecutive Families with Inherited Retinal Disease.	Stone EM, Andorf JL, Whitmore SS, DeLuca AP, Giacalone JC, Streb LM, Braun TA, Mullins RF, Scheetz TE, Sheffield VC, Tucker BA.	Ophthalmology. 2017 Sep;124(9):1314-1331. doi: 10.1016/j.ophtha.2017.04.008. Epub 2017 May 27.	Ophthalmology		2017			0.0587644		doi: 10.1016/j.ophtha.2017.04.008	28559085					0			0				0	0		doi: 10.1016/j.ophtha.2017.04.008	Stone EM, Andorf JL, Whitmore SS, DeLuca AP, Giacalone JC, Streb LM, Braun TA, Mullins RF, Scheetz TE, Sheffield VC, Tucker BA., Clinically Focused Molecular Investigation of 1000 Consecutive Families with Inherited Retinal Disease. Ophthalmology. 2017
2109	Comparison of Refractive Measures of Three Autorefractors in Children and Adolescents.	Xiong S, Lv M, Zou H, Zhu J, Lu L, Zhang B, Deng J, Yao C, He X, Xu X.	Optom Vis Sci. 2017 Sep;94(9):894-902. doi: 10.1097/OPX.0000000000001113.	Optom Vis Sci		2017			0.0587701		doi: 10.1097/OPX.0000000000001113	28816868					0			0				0	0		doi: 10.1097/OPX.0000000000001113	Xiong S, Lv M, Zou H, Zhu J, Lu L, Zhang B, Deng J, Yao C, He X, Xu X., Comparison of Refractive Measures of Three Autorefractors in Children and Adolescents. Optom Vis Sci. 2017
8038	Association of Body Length with Ocular Parameters in Mice.	Chakraborty R, Park HN, Tan CC, Weiss P, Prunty MC, Pardue MT.	Optom Vis Sci. 2017 Mar;94(3):387-394. doi: 10.1097/OPX.0000000000001036.	Optom Vis Sci		2017			0.0589248		doi: 10.1097/OPX.0000000000001036	28005683					0			0				0	0		doi: 10.1097/OPX.0000000000001036	Chakraborty R, Park HN, Tan CC, Weiss P, Prunty MC, Pardue MT., Association of Body Length with Ocular Parameters in Mice. Optom Vis Sci. 2017
2228	Patients' preferences for involvement in the decision-making process for treating diabetic retinopathy.	Marahrens L, Kern R, Ziemssen T, Fritsche A, Martus P, Ziemssen F, Roeck D.	BMC Ophthalmol. 2017 Aug 9;17(1):139. doi: 10.1186/s12886-017-0526-z.	BMC Ophthalmol		2017			0.0591821		doi: 10.1186/s12886-017-0526-z	28793881					0			0				0	0		doi: 10.1186/s12886-017-0526-z	Marahrens L, Kern R, Ziemssen T, Fritsche A, Martus P, Ziemssen F, Roeck D., Patients' preferences for involvement in the decision-making process for treating diabetic retinopathy. BMC Ophthalmol. 2017
5400	Cultivation of Human Oral Mucosal Explants on Contact Lenses.	Zsebik B, Ujlaky-Nagy L, Losonczy G, Vereb G, Takács L.	Curr Eye Res. 2017 Aug;42(8):1094-1099. doi: 10.1080/02713683.2017.1279635. Epub 2017 Mar 24.	Curr Eye Res		2017			0.0591831		doi: 10.1080/02713683.2017.1279635	28339301					0			0				0	0		doi: 10.1080/02713683.2017.1279635	Zsebik B, Ujlaky-Nagy L, Losonczy G, Vereb G, Takács L., Cultivation of Human Oral Mucosal Explants on Contact Lenses. Curr Eye Res. 2017
9004	Randomised controlled trial of prophylactic antibiotic treatment for the prevention of endophthalmitis after open globe injury at Groote Schuur Hospital.	Du Toit N, Mustak S, Cook C.	Br J Ophthalmol. 2017 Jul;101(7):862-867. doi: 10.1136/bjophthalmol-2016-309736. Epub 2016 Oct 28.	Br J Ophthalmol		2017			0.0592087		doi: 10.1136/bjophthalmol-2016-309736	27793818					0			0				0	0		doi: 10.1136/bjophthalmol-2016-309736	Du Toit N, Mustak S, Cook C., Randomised controlled trial of prophylactic antibiotic treatment for the prevention of endophthalmitis after open globe injury at Groote Schuur Hospital. Br J Ophthalmol. 2017
10556	Social care and support needs of community-dwelling people with dementia and concurrent visual impairment.	Nyman SR, Innes A, Heward M.	Aging Ment Health. 2017 Sep;21(9):961-967. doi: 10.1080/13607863.2016.1186151. Epub 2016 May 24.	Aging Ment Health		2017			0.0592203		doi: 10.1080/13607863.2016.1186151	27215277					0			0				0	0		doi: 10.1080/13607863.2016.1186151	Nyman SR, Innes A, Heward M., Social care and support needs of community-dwelling people with dementia and concurrent visual impairment. Aging Ment Health. 2017
2536	In Vivo Microvascular Pattern of Solitary Juxtapapillary Capillary Hemangioma on OCT Angiography.	Thirumalesh MB, Jain A, Agrawal S, Bhujang Shetty K.	Ophthalmic Surg Lasers Imaging Retina. 2017 Jul 1;48(7):592-595. doi: 10.3928/23258160-20170630-12.	Ophthalmic Surg Lasers Imaging Retina		2017			0.0592462		doi: 10.3928/23258160-20170630-12	28728187					0			0				0	0		doi: 10.3928/23258160-20170630-12	Thirumalesh MB, Jain A, Agrawal S, Bhujang Shetty K., In Vivo Microvascular Pattern of Solitary Juxtapapillary Capillary Hemangioma on OCT Angiography. Ophthalmic Surg Lasers Imaging Retina. 2017
5717	Pourfour du Petit Syndrome Associated With Right Eye Pressure.	Evans RW, Garibay A, Foroozan R.	Headache. 2017 Jun;57(6):937-942. doi: 10.1111/head.13059. Epub 2017 Mar 13. Review.	Headache		2017			0.0593338		doi: 10.1111/head.13059	28295246					0			0				0	0		doi: 10.1111/head.13059	Evans RW, Garibay A, Foroozan R., Pourfour du Petit Syndrome Associated With Right Eye Pressure. Headache. 2017
102	Orbital leiomyosarcoma metastasis presenting prior to diagnosis of the primary tumor.	Rasool N, Lefebvre DR, Latina MA, Dunn IF, Santagata S, Freitag SK, Cestari DM.	Digit J Ophthalmol. 2017 Dec 31;23(4):22-26. doi: 10.5693/djo.02.2017.02.004. eCollection 2017.	Digit J Ophthalmol		2017			0.0594203		doi: 10.5693/djo.02.2017.02.004	29403338					0			0				0	0		doi: 10.5693/djo.02.2017.02.004	Rasool N, Lefebvre DR, Latina MA, Dunn IF, Santagata S, Freitag SK, Cestari DM., Orbital leiomyosarcoma metastasis presenting prior to diagnosis of the primary tumor. Digit J Ophthalmol. 2017
4584	Evolution of choroidal thickness over time and effect of early and sustained therapy in birdshot retinochoroiditis.	Skvortsova N, Gasc A, Jeannin B, Herbort CP.	Eye (Lond). 2017 Aug;31(8):1205-1211. doi: 10.1038/eye.2017.54. Epub 2017 Apr 21.	Eye (Lond)		2017			0.0594583		doi: 10.1038/eye.2017.54	28430182					0			0				0	0		doi: 10.1038/eye.2017.54	Skvortsova N, Gasc A, Jeannin B, Herbort CP., Evolution of choroidal thickness over time and effect of early and sustained therapy in birdshot retinochoroiditis. Eye (Lond). 2017
2911	Functional Epitopes for Anti-Aquaporin 5 Antibodies in Sjögren Syndrome.	Alam J, Koh JH, Kwok SK, Park SH, Park K, Choi Y.	J Dent Res. 2017 Nov;96(12):1414-1421. doi: 10.1177/0022034517717965. Epub 2017 Jun 30.	J Dent Res		2017			0.0597686		doi: 10.1177/0022034517717965	28665757					0			0				0	0		doi: 10.1177/0022034517717965	Alam J, Koh JH, Kwok SK, Park SH, Park K, Choi Y., Functional Epitopes for Anti-Aquaporin 5 Antibodies in Sjögren Syndrome. J Dent Res. 2017
4332	In vitro and in vivo anti-uveal melanoma activity of JSL-1, a novel HDAC inhibitor.	Wang Y, Liu M, Jin Y, Jiang S, Pan J.	Cancer Lett. 2017 Aug 1;400:47-60. doi: 10.1016/j.canlet.2017.04.028. Epub 2017 Apr 26.	Cancer Lett		2017			0.0598324		doi: 10.1016/j.canlet.2017.04.028	28455241					0			0				0	0		doi: 10.1016/j.canlet.2017.04.028	Wang Y, Liu M, Jin Y, Jiang S, Pan J., In vitro and in vivo anti-uveal melanoma activity of JSL-1, a novel HDAC inhibitor. Cancer Lett. 2017
8539	Distinct patterns of imprecise consonant articulation among Parkinson's disease, progressive supranuclear palsy and multiple system atrophy.	Tykalova T, Rusz J, Klempir J, Cmejla R, Ruzicka E.	Brain Lang. 2017 Feb;165:1-9. doi: 10.1016/j.bandl.2016.11.005. Epub 2016 Nov 25.	Brain Lang		2017			0.0598814		doi: 10.1016/j.bandl.2016.11.005	27894006					0			0				0	0		doi: 10.1016/j.bandl.2016.11.005	Tykalova T, Rusz J, Klempir J, Cmejla R, Ruzicka E., Distinct patterns of imprecise consonant articulation among Parkinson's disease, progressive supranuclear palsy and multiple system atrophy. Brain Lang. 2017
4974	Ankylosing Spondylitis: HLA-B*27-Positive Versus HLA-B*27-Negative Disease.	Akkoç N, Yarkan H, Kenar G, Khan MA.	Curr Rheumatol Rep. 2017 May;19(5):26. doi: 10.1007/s11926-017-0654-8. Review.	Curr Rheumatol Rep		2017			0.0599329		doi: 10.1007/s11926-017-0654-8	28386763					0			0				0	0		doi: 10.1007/s11926-017-0654-8	Akkoç N, Yarkan H, Kenar G, Khan MA., Ankylosing Spondylitis: HLA-B*27-Positive Versus HLA-B*27-Negative Disease. Curr Rheumatol Rep. 2017
2346	Adiponectin Mediates Dietary Omega-3 Long-Chain Polyunsaturated Fatty Acid Protection Against Choroidal Neovascularization in Mice.	Fu Z, Liegl R, Wang Z, Gong Y, Liu CH, Sun Y, Cakir B, Burnim SB, Meng SS, Löfqvist C, SanGiovanni JP, Hellström A, Smith LEH.	Invest Ophthalmol Vis Sci. 2017 Aug 1;58(10):3862-3870. doi: 10.1167/iovs.17-21796.	Invest Ophthalmol Vis Sci		2017			0.0599501		doi: 10.1167/iovs.17-21796	28763559					0			0				0	0		doi: 10.1167/iovs.17-21796	Fu Z, Liegl R, Wang Z, Gong Y, Liu CH, Sun Y, Cakir B, Burnim SB, Meng SS, Löfqvist C, SanGiovanni JP, Hellström A, Smith LEH., Adiponectin Mediates Dietary Omega-3 Long-Chain Polyunsaturated Fatty Acid Protection Against Choroidal Neovascularization in Mice. Invest Ophthalmol Vis Sci. 2017
959	Concepts and Strategies in Retinal Gene Therapy.	Aguirre GD.	Invest Ophthalmol Vis Sci. 2017 Oct 1;58(12):5399-5411. doi: 10.1167/iovs.17-22978. No abstract available.	Invest Ophthalmol Vis Sci		2017			0.0600738		doi: 10.1167/iovs.17-22978	29053763					0			0				0	0		doi: 10.1167/iovs.17-22978	Aguirre GD., Concepts and Strategies in Retinal Gene Therapy. Invest Ophthalmol Vis Sci. 2017
10722	Design and evaluation of proniosomes as a carrier for ocular delivery of lomefloxacin HCl.	Khalil RM, Abdelbary GA, Basha M, Awad GE, El-Hashemy HA.	J Liposome Res. 2017 Jun;27(2):118-129. doi: 10.3109/08982104.2016.1167737. Epub 2016 May 12.	J Liposome Res		2017			0.060085		doi: 10.3109/08982104.2016.1167737	27079800					0			0				0	0		doi: 10.3109/08982104.2016.1167737	Khalil RM, Abdelbary GA, Basha M, Awad GE, El-Hashemy HA., Design and evaluation of proniosomes as a carrier for ocular delivery of lomefloxacin HCl. J Liposome Res. 2017
9298	Biologic Therapy for HLA-B27-associated Ocular Disorders.	Gueudry J, Thorne JE, Bansie R, Braun J, van Hagen PM, Bodaghi B.	Ocul Immunol Inflamm. 2017 Apr;25(2):169-178. doi: 10.1080/09273948.2016.1234625. Epub 2016 Oct 17. Review.	Ocul Immunol Inflamm		2017			0.0601268		doi: 10.1080/09273948.2016.1234625	27749140					0			0				0	0		doi: 10.1080/09273948.2016.1234625	Gueudry J, Thorne JE, Bansie R, Braun J, van Hagen PM, Bodaghi B., Biologic Therapy for HLA-B27-associated Ocular Disorders. Ocul Immunol Inflamm. 2017
10023	Retina ganglion cell/inner plexiform layer and peripapillary nerve fiber layer thickness in patients with acromegaly.	Şahin M, Şahin A, Kılınç F, Yüksel H, Özkurt ZG, Türkcü FM, Pekkolay Z, Soylu H, Çaça İ.	Int Ophthalmol. 2017 Jun;37(3):591-598. doi: 10.1007/s10792-016-0310-8. Epub 2016 Aug 4.	Int Ophthalmol		2017			0.0602129		doi: 10.1007/s10792-016-0310-8	27492731					0			0				0	0		doi: 10.1007/s10792-016-0310-8	Şahin M, Şahin A, Kılınç F, Yüksel H, Özkurt ZG, Türkcü FM, Pekkolay Z, Soylu H, Çaça İ., Retina ganglion cell/inner plexiform layer and peripapillary nerve fiber layer thickness in patients with acromegaly. Int Ophthalmol. 2017
7275	CLIPPERS and the need for long-term immunosuppression.	Abkur TM, Kearney H, Hennessy MJ.	Scott Med J. 2017 Feb;62(1):28-33. doi: 10.1177/0036933016689006. Epub 2017 Jan 22.	Scott Med J		2017			0.0603275		doi: 10.1177/0036933016689006	28110629					0			0				0	0		doi: 10.1177/0036933016689006	Abkur TM, Kearney H, Hennessy MJ., CLIPPERS and the need for long-term immunosuppression. Scott Med J. 2017
4219	Torpedo Maculopathy Associated with Choroidal Neovascularization.	Jurjevic D, Böni C, Barthelmes D, Fasler K, Becker M, Michels S, Stemmle J, Herbort C, Zweifel SA.	Klin Monbl Augenheilkd. 2017 Apr;234(4):508-514. doi: 10.1055/s-0043-100230. Epub 2017 May 3.	Klin Monbl Augenheilkd		2017			0.0603572		doi: 10.1055/s-0043-100230	28470647					0			0				0	0		doi: 10.1055/s-0043-100230	Jurjevic D, Böni C, Barthelmes D, Fasler K, Becker M, Michels S, Stemmle J, Herbort C, Zweifel SA., Torpedo Maculopathy Associated with Choroidal Neovascularization. Klin Monbl Augenheilkd. 2017
2097	Changing patterns of cataract services in North-West Nigeria: 2005-2016.	Muhammad N, Adamu MD, Caleb M, Maishanu NM, Jabo AM, Rabiu MM, Bascaran C, Isiyaku S, Foster A.	PLoS One. 2017 Aug 17;12(8):e0183421. doi: 10.1371/journal.pone.0183421. eCollection 2017.	PLoS One		2017			0.0605334		doi: 10.1371/journal.pone.0183421	28817733					0			0				0	0		doi: 10.1371/journal.pone.0183421	Muhammad N, Adamu MD, Caleb M, Maishanu NM, Jabo AM, Rabiu MM, Bascaran C, Isiyaku S, Foster A., Changing patterns of cataract services in North-West Nigeria: 2005-2016. PLoS One. 2017
4342	Patterns of visual field changes in thyroid eye disease.	Choi CJ, Oropesa S, Callahan AB, Glass LR, Teo L, Cestari DM, Kazim M, Freitag SK.	Orbit. 2017 Aug;36(4):201-207. doi: 10.1080/01676830.2017.1314510. Epub 2017 Apr 28.	Orbit		2017			0.0605418		doi: 10.1080/01676830.2017.1314510	28453366					0			0				0	0		doi: 10.1080/01676830.2017.1314510	Choi CJ, Oropesa S, Callahan AB, Glass LR, Teo L, Cestari DM, Kazim M, Freitag SK., Patterns of visual field changes in thyroid eye disease. Orbit. 2017
9577	Benefits and barriers of accommodating intraocular lenses.	Pepose JS, Burke J, Qazi MA.	Curr Opin Ophthalmol. 2017 Jan;28(1):3-8. Review.	Curr Opin Ophthalmol		2017			0.0605545		#VALUE!	27653608					0			0				0	0		#VALUE!	Pepose JS, Burke J, Qazi MA., Benefits and barriers of accommodating intraocular lenses. Curr Opin Ophthalmol. 2017
6097	Outcomes After Superior Rectus Transposition and Medial Rectus Recession Versus Vertical Recti Transposition for Sixth Nerve Palsy.	Lee YH, Lambert SR.	Am J Ophthalmol. 2017 May;177:100-105. doi: 10.1016/j.ajo.2017.02.019. Epub 2017 Feb 27.	Am J Ophthalmol		2017			0.0605645		doi: 10.1016/j.ajo.2017.02.019	28249714					0			0				0	0		doi: 10.1016/j.ajo.2017.02.019	Lee YH, Lambert SR., Outcomes After Superior Rectus Transposition and Medial Rectus Recession Versus Vertical Recti Transposition for Sixth Nerve Palsy. Am J Ophthalmol. 2017
[truncated: 10,415 more rows]

## Sheet: 200_random_study
ID	ID envoi	ID_inital	Title	Authors	Details	Journal	Journal2	Duplicates [=SI(NB.SI($E$2:E3;E3)>1;"";"n")]	Year	Random	Reference to be given to participant	DOI	DOI 2	PMID	_	OA PMC	OA journal (full hybrid)	OA restrained	OA Access full text (legal)	Access to Paywall articles	Price $	Price euros	Converted en $	Final price ($)
[truncated: 207 more rows]

[truncated: 1 more sheets: EuroToDollar]
