# Supplementary material for: Worldwide inequality in access to full text scientific articles: the example of ophthalmology
Source: PeerJ. 2019 Oct 30;7:e7850. doi: 10.7717/peerj.7850 (PMC6825414; doi:10.7717/peerj.7850)
Supplement: Supplemental Information 5 [file peerj-07-7850-s005.xlsx]

## Sheet: Argentina
ID Number (please do not modify)	Digital Object Identifier (DOI)	Reference	Access to Full text (Y/N)	Column 0/1
1	10.1016/j.neulet.2016.12.057	Azuchi Y, Kimura A, Guo X, Akiyama G, Noro T, Harada C, Nishigaki A, Namekata K, Harada T., Valproic acid and ASK1 deficiency ameliorate optic neuritis and neurodegeneration in an animal model of multiple sclerosis. Neurosci Lett. 2017	Y	1
2	10.1111/cge.12895	Kletke S, Batmanabane V, Dai T, Vincent A, Li S, Gordon KA, Papsin BC, Cushing SL, Héon E., The combination of vestibular impairment and congenital sensorineural hearing loss predisposes patients to ocular anomalies, including Usher syndrome. Clin Genet. 2017	Y	1
3	10.1097/DSS.0000000000000787	Martínez-Palmer A, Calsina-Prat M, Ormaechea N, Toll A., Reconstruction of Combined Upper and Lower Eyelid Defects in a Patient With Lentigo Maligna. Dermatol Surg. 2017	N	0
4	10.1093/brain/awx236	Niturad CE, Lev D, Kalscheuer VM, Charzewska A, Schubert J, Lerman-Sagie T, Kroes HY, Oegema R, Traverso M, Specchio N, Lassota M, Chelly J, Bennett-Back O, Carmi N, Koffler-Brill T, Iacomino M, Trivisano M, Capovilla G, Striano P, Nawara M, Rzonca S, Fischer U, et al., Rare GABRA3 variants are associated with epileptic seizures, encephalopathy and dysmorphic features. Brain. 2017	N	0
5	10.1080/13816810.2016.1188124	Tyagi P, Juma Z, Reddy AR., Retinal features in Mulvihill-Smith syndrome. Ophthalmic Genet. 2017	N	0
6	10.1097/WNO.0000000000000455	Mendes Marques NBPS, Barros SR, Miranda AF, Nobre Cardoso J, Parreira S, Fonseca T, Donaire NM, Campos N., Horizontal Gaze Palsy and Progressive Scoliosis With ROBO 3 Mutations in Patients From Cape Verde. J Neuroophthalmol. 2017	N	0
7	10.1080/09286586.2017.1313992	Oye J, Mactaggart I, Polack S, Schmidt E, Tamo V, Okwen M, Kuper H., Prevalence and Causes of Visual Impairment in Fundong District, North West Cameroon: Results of a Population-Based Survey. Ophthalmic Epidemiol. 2017	N	0
8	10.1016/j.clae.2017.01.003	Gifford K, Gifford P, Hendicott PL, Schmid KL., Near binocular visual function in young adult orthokeratology versus soft contact lens wearers. Cont Lens Anterior Eye. 2017	Y	1
9	10.2217/bmm-2017-0218	Wostyn P, De Deyn PP., Intracranial pressure-induced optic nerve sheath response as a predictive biomarker for optic disc edema in astronauts. Biomark Med. 2017	N	0
10	10.1097/WNO.0000000000000555	Morrow MJ, Ko MW., Should Oral Corticosteroids Be Used to Treat Demyelinating Optic Neuritis? J Neuroophthalmol. 2017	N	0
11	10.1080/09273972.2017.1349816	Morad Y, Pras E, Nemet A., Superior and Lateral Rectus Myopexy for Acquired Adult Distance Esotropia: A "One Size Fits All" Surgery. Strabismus. 2017	N	0
12	10.1097/IOP.0000000000000731	Repp DJ, Rubinstein TJ, Herreid PA, Sires BS., Biomechanics of the Levator Aponeurosis. Ophthal Plast Reconstr Surg. 2017	N	0
13	10.1007/s00417-017-3817-4	De Gregorio A, Pedrotti E, Stevan G, Montali M, Morselli S., Safety and efficacy of multiple cyclocoagulation of ciliary bodies by high-intensity focused ultrasound in patients with glaucoma. Graefes Arch Clin Exp Ophthalmol. 2017	Y	1
14	10.1111/aos.13445	Ten Berge JCEM, van Dijk EHC, Schreurs MWJ, Vermeer J, Boon CJF, Rothova A., Antiretinal antibodies in central serous chorioretinopathy: prevalence and clinical implications. Acta Ophthalmol. 2018	Y	1
15	10.1007/s10072-016-2785-5	Kang H, Kim SK, Park KJ, Choi NC, Kwon OY, Lim BH., Hemianopic line bisection error in a patient with Alzheimer's disease. Neurol Sci. 2017	Y	1
16	10.1212/WNL.0000000000004312	Hennes EM, Baumann M, Schanda K, Anlar B, Bajer-Kornek B, Blaschek A, Brantner-Inthaler S, Diepold K, Eisenkölbl A, Gotwald T, Kuchukhidze G, Gruber-Sedlmayr U, Häusler M, Höftberger R, Karenfort M, Klein A, Koch J, Kraus V, Lechner C, Leiz S, Leypoldt F, Mader S, et al., Prognostic relevance of MOG antibodies in children with an acquired demyelinating syndrome. Neurology. 2017	N	0
17	10.1016/j.oftal.2016.08.006	Pareja-Ríos A, Bonaque-González S, Serrano-García M, Cabrera-López F, Abreu-Reyes P, Marrero-Saavedra MD., Tele-ophthalmology for diabetic retinopathy screening: 8 years of experience. Arch Soc Esp Oftalmol. 2017	N	0
18	10.1007/s00417-016-3530-8	Mikhail M, El-Rayes EN, Kojima K, Ajlan R, Rezende F., Catheter-guided suprachoroidal buckling of rhegmatogenous retinal detachments secondary to peripheral retinal breaks. Graefes Arch Clin Exp Ophthalmol. 2017	Y	1
19	10.1007/s00417-017-3616-y	Shah MA, Agrawal R, Teoh R, Shah SM, Patel K, Gupta S, Gosai S., Pediatric ocular trauma score as a prognostic tool in the management of pediatric traumatic cataracts. Graefes Arch Clin Exp Ophthalmol. 2017	Y	1
20	10.1016/j.jfo.2016.09.014	Zaarour K, Slim E, Antoun J, Waked N., Thick keratoconic cornea associated with posterior polymorphous corneal dystrophy. J Fr Ophtalmol. 2017	N	0
21	10.1097/IAE.0000000000001311	Shifera AS, Pennesi ME, Yang P, Lin P., ULTRA-WIDE-FIELD FUNDUS AUTOFLUORESCENCE FINDINGS IN PATIENTS WITH ACUTE ZONAL OCCULT OUTER RETINOPATHY. Retina. 2017	N	0
22	10.1080/13816810.2017.1354384	Bryant L, Lozynska O, Han G, Morgan JIW, Gai X, Maguire AM, Aleman T, Bennett J., On variants and disease-causing mutations: Case studies of a SEMA4A variant identified in inherited blindness. Ophthalmic Genet. 2018	N	0
23	10.1097/IAE.0000000000001391	Cheung CMG, Yanagi Y, Mohla A, Lee SY, Mathur R, Chan CM, Yeo I, Wong TY., CHARACTERIZATION AND DIFFERENTIATION OF POLYPOIDAL CHOROIDAL VASCULOPATHY USING SWEPT SOURCE OPTICAL COHERENCE TOMOGRAPHY ANGIOGRAPHY. Retina. 2017	N	0
24	10.1016/j.jcjo.2016.08.003	Lassalle S, Maschi C, Caujolle JP, Giordanengo V, Hofman P., Inverted conjunctival papilloma: a certainly underestimated high-risk lesion for carcinomatous transformation-a case report. Can J Ophthalmol. 2017	Y	1
25	10.2217/epi-2017-0060	Piras IS, Mills G, Llaci L, Naymik M, Ramsey K, Belnap N, Balak CD, Jepsen WM, Szelinger S, Siniard AL, Lewis CR, LaFleur M, Richholt RF, De Both MD, Avela K, Rangasamy S, Craig DW, Narayanan V, Järvelä I, Huentelman MJ, Schrauwen I., Exploring genome-wide DNA methylation patterns in Aicardi syndrome. Epigenomics. 2017	N	0
26	10.1097/IJG.0000000000000551	Perez CI, Mellado F, Jones A, Colvin R., Trabeculectomy Combined With Collagen Matrix Implant (Ologen). J Glaucoma. 2017	N	0
27	10.1016/j.jcjo.2016.07.015	De Oliveira PR, Berger AR, Chow DR., Optical coherence tomography angiography in chorioretinal disorders. Can J Ophthalmol. 2017	Y	1
28	10.1016/j.jneuroim.2017.07.006	Yoshikura N, Kimura A, Hayashi Y, Inuzuka T., Anti-C1q autoantibodies in patients with neuromyelitis optica spectrum disorders. J Neuroimmunol. 2017	Y	1
29	10.1097/SCS.0000000000003431	Na J, Choi SY, Baek S, Lee H., Hemorrhage and Infarction of the Conjunctiva and Orbit in Essential Thrombocythemia. J Craniofac Surg. 2017	Y	1
30	10.1097/ICB.0000000000000374	Despréaux R, Mrejen S, Quentel G, Cohen SY., EN FACE OPTICAL COHERENCE TOMOGRAPHY (OCT) AND OCT ANGIOGRAPHY FINDINGS IN RETINAL ASTROCYTIC HAMARTOMAS. Retin Cases Brief Rep. 2017	N	0
31	10.1136/bjophthalmol-2016-309996	Dagi LR, MacKinnon S, Zurakowski D, Prabhu SP., Rectus muscle excyclorotation and V-pattern strabismus: a quantitative appraisal of clinical relevance in syndromic craniosynostosis. Br J Ophthalmol. 2017	N	0
32	10.1097/IAE.0000000000001351	Medina CA, Ortiz AG, Relhan N, Smiddy WE, Townsend JH, Flynn HW Jr., MACULAR HOLE AFTER PARS PLANA VITRECTOMY FOR RHEGMATOGENOUS RETINAL DETACHMENT. Retina. 2017	N	0
33	10.1080/09286586.2016.1257027	Malkin AG, Goldstein JE, Massof RW., Multivariable Regression Model of the EuroQol 5-Dimension Questionnaire in Patients Seeking Outpatient Low Vision Rehabilitation. Ophthalmic Epidemiol. 2017	N	0
34	10.1007/s00018-017-2643-5	Kudo A., Introductory review: periostin-gene and protein structure. Cell Mol Life Sci. 2017	Y	1
35	10.1080/02713683.2017.1344712	Wang T, Zhu L, Peng Y, Shen N, Yu Y, Yao M, Zhu J., Photochemical Cross-Linking for Penetrating Corneal Wound Closure in Enucleated Porcine Eyes. Curr Eye Res. 2017	N	0
36	10.1093/brain/awx219	Gerber S, Charif M, Chevrollier A, Chaumette T, Angebault C, Kane MS, Paris A, Alban J, Quiles M, Delettre C, Bonneau D, Procaccio V, Amati-Bonneau P, Reynier P, Leruez S, Calmon R, Boddaert N, Funalot B, Rio M, Bouccara D, Meunier I, Sesaki H, et al., Mutations in DNM1L, as in OPA1, result indominant optic atrophy despite opposite effectson mitochondrial fusion and fission. Brain. 2017	N	0
37	10.1097/IAE.0000000000001683	Cheng YC, Shen JH, Chao AN, Chen KJ., Later Development of Posterior Staphyloma in Choroidal Osteoma With Choroidal Neovascularization. Retina. 2017	N	0
38	10.2174/1567202614666161104115440	Shimazawa M, Inoue Y, Masuda T, Onodera R, Tahara K, Shimizu Y, Mibe Y, Tsuruma K, Takeuchi H, Hara H., Topical Diclofenac-Loaded Liposomes Ameliorate Laser-Induced Choroidal Neovascularization in Mice and Non-Human Primates. Curr Neurovasc Res. 2017	N	0
39	10.1007/s00405-016-4308-7	Ozsutcu M, Balci O, Tanriverdi C, Demirci G., Efficacy of adjunctive mitomycin C in transcanalicular diode laser dacryocystorhinostomy. Eur Arch Otorhinolaryngol. 2017	y	1
40	10.1136/bjophthalmol-2016-309775	Aixinjueluo W, Usui T, Miyai T, Toyono T, Sakisaka T, Yamagami S., Accelerated transepithelial corneal cross-linking for progressive keratoconus: a prospective study of 12 months. Br J Ophthalmol. 2017	N	0
41	10.1016/j.ijporl.2016.11.027	Yin T, van der Meer G., Neonatal airway obstruction in bilateral congenital dacryocystocoele: Case report and review of the literature. Int J Pediatr Otorhinolaryngol. 2017	y	1
42	10.1007/s00417-017-3860-1	Chan JCW, Choy BNK, Chan OCC, Li KKW., Early intraocular pressure change after peripheral iridotomy with ultralow fluence pattern scanning laser and Nd:YAG laser in primary angle-closure suspect: Kowloon East Pattern Scanning Laser Study Report No. 3. Graefes Arch Clin Exp Ophthalmol. 2018	Y	1
43	10.1136/bjophthalmol-2016-309245	Sharma S, Ang M, Najjar RP, Sng C, Cheung CY, Rukmini AV, Schmetterer L, Milea D., Optical coherence tomography angiography in acute non-arteritic anterior ischaemic optic neuropathy. Br J Ophthalmol. 2017	N	0
44	10.1080/01676830.2017.1279664	Medel R, Balaguer Solé Ò, Vasquez LM., Inferior tarsal muscle-conjunctivectomy for reverse ptosis repair: A novel technique. Orbit. 2017	N	0
45	10.1038/eye.2017.25	Betts T, Ahmed S, Maguire S, Watts P., Characteristics of non-vitreoretinal ocular injury in child maltreatment: a systematic review. Eye (Lond). 2017	N	0
46	10.1007/s10792-016-0261-0	Altunel O, Duru N, Goktas A, Ozkose A, Goktas E, Atas M., Evaluation of foveal photoreceptor layer in eyes with macular edema associated with branch retinal vein occlusion after ozurdex treatment. Int Ophthalmol. 2017	N	0
47	10.1159/000478705	Motohashi R, Noma H, Yasuda K, Kotake O, Goto H, Shimura M., Dynamics of Inflammatory Factors in Aqueous Humor during Ranibizumab or Aflibercept Treatment for Age-Related Macular Degeneration. Ophthalmic Res. 2017	N	0
48	10.1016/j.jns.2017.01.033	Kang S, Shaikh AG., Acquired pendular nystagmus. J Neurol Sci. 2017	Y	1
49	10.1097/WNO.0000000000000503	Sadaka A, Schockman SL, Golnik KC., Evaluation of Horner Syndrome in the MRI Era. J Neuroophthalmol. 2017	N	0
50	10.1136/bjophthalmol-2016-310105	Jirawison C, Liu Y, Surasit K, Maningding E, Kamphaengkham S, Ausayakhun S, Heiden D, Margolis TP, Gonzales JA, Acharya NR, Keenan JD., Fundus findings in a series of patients with extrapulmonary tuberculosis in Thailand. Br J Ophthalmol. 2017	N	0
51	10.1016/j.neuroimage.2016.12.053	Pelland M, Orban P, Dansereau C, Lepore F, Bellec P, Collignon O., State-dependent modulation of functional connectivity in early blind individuals. Neuroimage. 2017	Y	1
52	10.1097/ICO.0000000000001130	Zhang X, Bitar M, Davis RM., Spontaneous Canalicular Plug Erosion After Punctal Plug Placement. Cornea. 2017	N	0
53	10.3928/23258160-20171030-04	Stephens JD, Adam MK, Todorich B, Faia LJ, Garg S, Dunn JP, Mehta S., Optical Coherence Tomography Findings in Endogenous Fungal Chorioretinitis, Retinitis, and Endophthalmitis. Ophthalmic Surg Lasers Imaging Retina. 2017	N	0
54	10.1097/ICL.0000000000000297	Hashemi H, Rastad H, Emamian MH, Fotouhi A., Floppy Eyelid Syndrome and Its Determinants in Iranian Adults: A Population-Based Study. Eye Contact Lens. 2017	N	0
55	10.1177/2165079916686592	Lurati AR., Identifying Personal Risk Factors for Falls in the Workplace. Workplace Health Saf. 2017	Y	1
56	10.1016/j.ad.2016.07.006	Miura T, Ohtsuka M, Yamamoto T., Sweet's syndrome-like eruption in association with the exacerbation of Behçet's disease after the Great East Japan Earthquake. Actas Dermosifiliogr. 2017	N	0
57	10.1001/jamaophthalmol.2017.1009	Borkar DS, Homayounfar G, Tham VM, Ray KJ, Vinoya AC, Uchida A, Acharya NR., Association Between Thyroid Disease and Uveitis: Results From the Pacific Ocular Inflammation Study. JAMA Ophthalmol. 2017	N	0
58	10.1111/opo.12332	Li SM, Kang MT, Wu SS, Meng B, Sun YY, Wei SF, Liu L, Peng X, Chen Z, Zhang F, Wang N., Studies using concentric ring bifocal and peripheral add multifocal contact lenses to slow myopia progression in school-aged children: a meta-analysis. Ophthalmic Physiol Opt. 2017	Y	1
59	10.1097/IAE.0000000000001666	Hwang CK, Kolomeyer AM, Brucker AJ, Morgan JIW, Nichols CW, Aleman TS., Localized Bilateral Juxtafoveal Photoreceptor Loss in POEMS: A New Association. Retina. 2017	N	0
60	10.1159/000473701	Daien V, Le Pape A, Heve D, Villain M, Bremond Gignac D; Collaborators of the Epidemiology and Safety Program (EPISAFE).., Incidence and Characteristics of Congenital Cataract Surgery in France from 2010 to 2012: The EPISAFE Program. Ophthalmic Res. 2017	N	0
61	10.2337/db16-1364	Simó R, Hernández C., GLP-1R as a Target for the Treatment of Diabetic Retinopathy: Friend or Foe? Diabetes. 2017	Y	1
62	10.1016/j.ajo.2016.11.009	Ares WJ, Tonetti D, Yu JY, Monaco EA, Flickinger JC, Lunsford LD., Gamma Knife Radiosurgery for Uveal Metastases: Report of Three Cases and a Review of the Literature. Am J Ophthalmol. 2017	Y	1
63	10.1007/s40618-017-0608-z	Bartalena L, Veronesi G, Krassas GE, Wiersinga WM, Marcocci C, Marinò M, Salvi M, Daumerie C, Bournaud C, Stahl M, Sassi L, Azzolini C, Boboridis KG, Mourits MP, Soeters MR, Baldeschi L, Nardi M, Currò N, Boschi A, Bernard M, von Arx G, Perros P, et al., Does early response to intravenous glucocorticoids predict the final outcome in patients with moderate-to-severe and active Graves' orbitopathy?…	N	0
64	10.1016/j.jneuroim.2017.08.003	Palterer B, Brugnolo F, Sieni E, Barilaro A, Parronchi P., Neuromyelitis optica, atypical hemophagocytic lymphohistiocytosis and heterozygous perforin A91V mutation. J Neuroimmunol. 2017	Y	1
65	10.1111/ped.13149	Demircioğlu Kılıc B, Akbalık Kara M, Ozcelik AA, Ustunsoy H, Balat A., Brachial artery pseudoaneurysm: Rare finding in childhood Behcet's disease. Pediatr Int. 2017	Y	1
66	10.3233/JAD-161190	Shellington EM, Heath M, Gill DP, Petrella RJ., Long-Term Maintenance of Executive-Related Oculomotor Improvements in Older Adults with Self-Reported Cognitive Complaints Following a 24-Week Multiple Modality Exercise Program. J Alzheimers Dis. 2017	N	0
67	10.1055/s-0043-100116	Li J, Cai Y, Sun X, Yao D, Xia J., MiR-346 and TRAb as Predicative Factors for Relapse in Graves' Disease Within One Year. Horm Metab Res. 2017	N	0
68	10.1097/ICO.0000000000001100	Farooq AV., Herpes Simplex Virus Keratitis and Resistance to Acyclovir. Cornea. 2017	N	0
69	10.1080/02713683.2017.1341534	Modrzejewska M, Wiącek MP., A Novel Approach to the Differentiation of Intrabulbar Tumors in Color Doppler Imaging. Curr Eye Res. 2017	N	0
70	10.1080/02713683.2017.1358373	Yamada Y, Suzuma K, Onizuka N, Uematsu M, Mohamed YH, Kitaoka T., Evaluation of retinal blood flow before and after panretinal photocoagulation using pattern scan laser for diabetic retinopathy. Curr Eye Res. 2017	N	0
71	10.1097/IOP.0000000000000723	Chisholm SAM, Couch SM, Custer PL., Etiology and Management of Allergic Eyelid Dermatitis. Ophthal Plast Reconstr Surg. 2017	N	0
72	10.1016/j.expneurol.2016.08.004	Eapen BC, Murphy DP, Cifu DX., Neuroprosthetics in amputee and brain injury rehabilitation. Exp Neurol. 2017	Y	1
73	10.1136/bjophthalmol-2016-309460	Bhardwaj M, Sen S, Chosdol K, Sharma A, Pushker N, Kashyap S, Bakhshi S, Bajaj MS., miRNA-200c and miRNA-141 as potential prognostic biomarkers and regulators of epithelial-mesenchymal transition in eyelid sebaceous gland carcinoma. Br J Ophthalmol. 2017	N	0
74	10.1136/jnnp-2017-315782	Evoli A, Alboini PE, Iorio R, Damato V, Bartoccioni E., Pattern of ocular involvement in myasthenia gravis with MuSK antibodies. J Neurol Neurosurg Psychiatry. 2017	N	0
75	10.3928/01913913-20170309-01	Rajavi Z, Feizi M, Behradfar N, Yaseri M, Sayanjali S, Motevaseli T, Sabbaghi H, Faghihi M., Inferior Oblique Overaction: Anterior Transposition Versus Myectomy. J Pediatr Ophthalmol Strabismus. 2017	N	0
76	10.1080/02713683.2016.1223317	Jia Y, Hu DN, Sun J, Zhou J., Correlations Between MMPs and TIMPs Levels in Aqueous Humor from High Myopia and Cataract Patients. Curr Eye Res. 2017	N	0
77	10.1097/IOP.0000000000000536	Cole SC, Eftekhari K, Oberg T, Mamalis N, Anderson RL., Osteolytic Sarcoidosis of the Orbital Roof Masquerading as a Malignant Orbital Lesion. Ophthal Plast Reconstr Surg. 2017	N	0
78	10.1111/desc.12379	Hadad BS, Maurer D, Lewis TL., The role of early visual input in the development of contour interpolation: the case of subjective contours. Dev Sci. 2017	Y	1
79	10.3109/13816810.2016.1164192	Topçu V, Alp MY, Alp CK, Bakır A, Geylan D, Yılmazoğlu MÖ., A new familial case of Jalili syndrome caused by a novel mutation in CNNM4. Ophthalmic Genet. 2017	N	0
80	10.1016/j.ophtha.2017.07.010	Pflugfelder SC, de Paiva CS., The Pathophysiology of Dry Eye Disease: What We Know and Future Directions for Research. Ophthalmology. 2017	N	0
81	10.14670/HH-11-820	Kimura A, Namekata K, Guo X, Harada C, Harada T., Dock3-NMDA receptor interaction as a target for glaucoma therapy. Histol Histopathol. 2017	N	0
82	10.1016/j.oftal.2016.03.021	Cañizares B, Yago I, Piñero Á, Ruiz M., Unilateral persistent fetal vasculature coexisting with anterior segment dysgenesia. Arch Soc Esp Oftalmol. 2017	N	0
83	10.1136/jmedgenet-2016-104212	Gerber S, Ding MG, Gérard X, Zwicker K, Zanlonghi X, Rio M, Serre V, Hanein S, Munnich A, Rotig A, Bianchi L, Amati-Bonneau P, Elpeleg O, Kaplan J, Brandt U, Rozet JM., Compound heterozygosity for severe and hypomorphic NDUFS2 mutations cause non-syndromic LHON-like optic neuropathy. J Med Genet. 2017	N	0
84	10.1093/hmg/ddx168	Whitman MC, Engle EC., Ocular congenital cranial dysinnervation disorders (CCDDs): insights into axon growth and guidance. Hum Mol Genet. 2017	Y	1
85	10.1016/j.ophtha.2017.01.027	Wu Z, Saunders LJ, Daga FB, Diniz-Filho A, Medeiros FA., Frequency of Testing to Detect Visual Field Progression Derived Using a Longitudinal Cohort of Glaucoma Patients. Ophthalmology. 2017	N	0
86	10.1038/eye.2017.34	Midena E, Pilotto E., Microperimetry in age: related macular degeneration. Eye (Lond). 2017	N	0
87	10.1097/IOP.0000000000000806	Hirabayashi KE, Kalin-Hajdu E, Brodie FL, Kersten RC, Russell MS, Vagefi MR., Retrobulbar Injection of Amphotericin B for Orbital Mucormycosis. Ophthal Plast Reconstr Surg. 2017	N	0
88	10.1097/ICU.0000000000000456	Sozeri Y, Salim S., Anticlotting agents and the surgical management of glaucoma. Curr Opin Ophthalmol. 2018	Y	1
89	10.1097/IAE.0000000000001368	Yong Huang X, Wu N, Li N, Wang Y, Shakoor A., Diagnostic and Therapeutic Challenges. Retina. 2017	N	0
90	10.1007/s12031-016-0869-6	D'Amico AG, Maugeri G, Bucolo C, Saccone S, Federico C, Cavallaro S, D'Agata V., Nap Interferes with Hypoxia-Inducible Factors and VEGF Expression in Retina of Diabetic Rats. J Mol Neurosci. 2017	Y	1
91	10.1097/ICO.0000000000001129	Nakagawa H, Hattori T, Koike N, Ehara T, Narimatsu A, Kumakura S, Matsumoto T, Goto H., Number of Bacteria and Time of Coincubation With Bacteria Required for the Development of Acanthamoeba Keratitis. Cornea. 2017	N	0
92	10.1097/IAE.0000000000001408	Pertl L, Haas A, Hausberger S, Pichler T, Rabensteiner DF, Seidel G, Malle EM, Weger M., CHANGE OF CHOROIDAL VOLUME IN UNTREATED CENTRAL SEROUS CHORIORETINOPATHY. Retina. 2017	N	0
93	10.1002/dmrr.2860	Omori Y, Yanagisawa K, Sato A, Uchigata Y., The importance of nonstop treatment after delivery for pregnant women with type 2 diabetes. Diabetes Metab Res Rev. 2017	Y	1
94	10.1016/j.anai.2017.01.027	Bork K, Brehler R, Witzke G, Boor S, Heineke W, Hardt J., Blindness, tetraspasticity, and other signs of irreversible brain damage in hereditary angioedema. Ann Allergy Asthma Immunol. 2017	N	0
95	10.1007/s10067-016-3417-4	Vitale A, Emmi G, Lopalco G, Gentileschi S, Silvestri E, Fabiani C, Urban ML, Frediani B, Galeazzi M, Iannone F, Rigante D, Cantarini L., Adalimumab effectiveness in Behçet's disease: short and long-term data from a multicenter retrospective observational study. Clin Rheumatol. 2017	Y	1
96	10.1038/nprot.2017.032	Lückoff A, Scholz R, Sennlaub F, Xu H, Langmann T., Comprehensive analysis of mouse retinal mononuclear phagocytes. Nat Protoc. 2017	N	0
97	10.1097/ICO.0000000000001038	Micali A, Roszkowska AM, Postorino EI, Rania L, Aragona E, Wylegala E, Nowinska A, Ieni A, Calimeri S, Pisani A, Aragona P, Puzzolo D., Comparative Confocal and Histopathological Study of Corneal Changes in Multiple Myeloma. Cornea. 2017	N	0
98	10.1097/ICU.0000000000000385	Daya SM., Conjunctival-limbal autograft. Curr Opin Ophthalmol. 2017	N	0
99	10.1007/s10384-016-0490-9	Shalaby U., Diltiazem co treatment with cyclosporine for induction of disease remission in sight-threatening non-infectious intraocular inflammation. Jpn J Ophthalmol. 2017	Y	1
100	10.1016/j.ajo.2016.12.023	Tavares Ferreira J, Proença R, Alves M, Dias-Santos A, Santos BO, Cunha JP, Papoila AL, Abegão Pinto L., Retina and Choroid of Diabetic Patients Without Observed Retinal Vascular Changes: A Longitudinal Study. Am J Ophthalmol. 2017	N	0
101	10.1016/j.jcjo.2016.07.026	Eom Y, Song JS, Kim HM., Spectacle plane add power of multifocal intraocular lenses according to effective lens position. Can J Ophthalmol. 2017	Y	1
102	10.1097/IAE.0000000000001401	Tye A, Klufas MA, McCannel CA, McCannel TA., Intracameral Air in Phacovitrectomy for Maintaining Intraocular Lens Position. Retina. 2017	N	0
103	10.1111/aos.13385	Jacobsen AG, Brost B, Vorum H, Hargitai J., Functional benefits and patient satisfaction with upper blepharoplasty - evaluated by objective and subjective outcome measures. Acta Ophthalmol. 2017	Y	1
104	10.1136/bjophthalmol-2016-309504	Himori N, Kunikata H, Kawasaki R, Shiga Y, Omodaka K, Takahashi H, Miyata T, Nakazawa T., The association between skin autofluorescence and mean deviation in patients with open-angle glaucoma. Br J Ophthalmol. 2017	N	0
105	10.1007/s00417-017-3696-8	Callizo J, Pfeiffer S, Lahme E, van Oterendorp C, Khattab M, Bemme S, Kulanga M, Hoerauf H, Feltgen N., Risk of progression in macula-on rhegmatogenous retinal detachment. Graefes Arch Clin Exp Ophthalmol. 2017	Y	1
106	10.1111/cup.12909	Motaparthi K., Pseudoherpetic transient acantholytic dermatosis (Grover disease): case series and review of the literature. J Cutan Pathol. 2017	Y	1
107	10.1097/IOP.0000000000000837	Charles NC, Jakobiec FA, Patel P., Periorbital Dermoid Cyst With Unique Trichilemmal Differentiation. Ophthal Plast Reconstr Surg. 2017	N	0
108	10.1080/09286586.2016.1255763	Sasongko MB, Agni AN, Wardhana FS, Kotha SP, Gupta P, Widayanti TW, Supanji, Widyaputri F, Widyaningrum R, Wong TY, Kawasaki R, Wang JJ, Pawiroranu S., Rationale and Methodology for a Community-Based Study of Diabetic Retinopathy in an Indonesian Population with Type 2 Diabetes Mellitus: The Jogjakarta Eye Diabetic Study in the Community. Ophthalmic Epidemiol. 2017	N	0
109	10.1111/jnc.14070	Bordone MP, González Fleitas MF, Pasquini LA, Bosco A, Sande PH, Rosenstein RE, Dorfman D., Involvement of microglia in early axoglial alterations of the optic nerve induced by experimental glaucoma. J Neurochem. 2017	y	1
110	10.1016/j.ajpath.2017.08.025	Kumar S, Nakashizuka H, Jones A, Lambert A, Zhao X, Shen M, Parker M, Wang S, Berriochoa Z, Fnu A, VanBeuge S, Chévez-Barrios P, Tso M, Rainier J, Fu Y., Proteolytic Degradation and Inflammation Play Critical Roles in Polypoidal Choroidal Vasculopathy. Am J Pathol. 2017	y	1
111	10.1017/S0031182017000270	Chen SJ, Zhang YX, Huang SG, Lu FL., Galectins expressed differently in genetically susceptible C57BL/6 and resistant BALB/c mice during acute ocular Toxoplasma gondii infection. Parasitology. 2017	N	0
112	10.1111/aos.13226	Wirth MA, Freiberg F, Pfau M, Wons J, Becker MD, Michels S., Optical coherence tomography angiography in age-related macular degeneration: persistence of vascular network in quiescent choroidal neovascularization. Acta Ophthalmol. 2017	y	1
113	10.1136/bjophthalmol-2015-307837	Dhalla K, Cousens S, Murdoch IE., Phacoemulsification compared with phacotrabeculectomy surgery: a within-person observational cohort study. Br J Ophthalmol. 2017	N	0
114	10.3171/2016.12.SPINE16540	Ibrahim TF, Sweis RT, Nockels RP., Reversible postoperative blindness caused by bilateral status epilepticus amauroticus following thoracolumbar deformity correction: case report. J Neurosurg Spine. 2017	N	0
115	10.1097/ICO.0000000000001263	Oliva-Biénzobas V, Navas A, C Astiazarán M, Chacón-Camacho OF, A Bermúdez-Magner J, Takane M, Graue-Hernández E, Zenteno JC., CYP1B1 Cytopathy: Uncommon Phenotype of a Homozygous CYP1B1 Deletion as Internal Corneal Ulcer of Von Hippel. Cornea. 2017	N	0
				39

## Sheet: Germany
ID Number (please do not modify)	Digital Object Identifier (DOI)	Reference	Access to Full text (Y/N)	Column 0/1
1	10.1016/j.neulet.2016.12.057	Azuchi Y, Kimura A, Guo X, Akiyama G, Noro T, Harada C, Nishigaki A, Namekata K, Harada T., Valproic acid and ASK1 deficiency ameliorate optic neuritis and neurodegeneration in an animal model of multiple sclerosis. Neurosci Lett. 2017	Y	1
2	10.1111/cge.12895	Kletke S, Batmanabane V, Dai T, Vincent A, Li S, Gordon KA, Papsin BC, Cushing SL, Héon E., The combination of vestibular impairment and congenital sensorineural hearing loss predisposes patients to ocular anomalies, including Usher syndrome. Clin Genet. 2017	Y	1
3	10.1097/DSS.0000000000000787	Martínez-Palmer A, Calsina-Prat M, Ormaechea N, Toll A., Reconstruction of Combined Upper and Lower Eyelid Defects in a Patient With Lentigo Maligna. Dermatol Surg. 2017	Y	1
4	10.1093/brain/awx236	Niturad CE, Lev D, Kalscheuer VM, Charzewska A, Schubert J, Lerman-Sagie T, Kroes HY, Oegema R, Traverso M, Specchio N, Lassota M, Chelly J, Bennett-Back O, Carmi N, Koffler-Brill T, Iacomino M, Trivisano M, Capovilla G, Striano P, Nawara M, Rzonca S, Fischer U, et al., Rare GABRA3 variants are associated with epileptic seizures, encephalopathy and dysmorphic features. Brain. 2017	Y	1
5	10.1080/13816810.2016.1188124	Tyagi P, Juma Z, Reddy AR., Retinal features in Mulvihill-Smith syndrome. Ophthalmic Genet. 2017	N	0
6	10.1097/WNO.0000000000000455	Mendes Marques NBPS, Barros SR, Miranda AF, Nobre Cardoso J, Parreira S, Fonseca T, Donaire NM, Campos N., Horizontal Gaze Palsy and Progressive Scoliosis With ROBO 3 Mutations in Patients From Cape Verde. J Neuroophthalmol. 2017	N	0
7	10.1080/09286586.2017.1313992	Oye J, Mactaggart I, Polack S, Schmidt E, Tamo V, Okwen M, Kuper H., Prevalence and Causes of Visual Impairment in Fundong District, North West Cameroon: Results of a Population-Based Survey. Ophthalmic Epidemiol. 2017	N	0
8	10.1016/j.clae.2017.01.003	Gifford K, Gifford P, Hendicott PL, Schmid KL., Near binocular visual function in young adult orthokeratology versus soft contact lens wearers. Cont Lens Anterior Eye. 2017	N	0
9	10.2217/bmm-2017-0218	Wostyn P, De Deyn PP., Intracranial pressure-induced optic nerve sheath response as a predictive biomarker for optic disc edema in astronauts. Biomark Med. 2017	N	0
10	10.1097/WNO.0000000000000555	Morrow MJ, Ko MW., Should Oral Corticosteroids Be Used to Treat Demyelinating Optic Neuritis? J Neuroophthalmol. 2017	N	0
11	10.1080/09273972.2017.1349816	Morad Y, Pras E, Nemet A., Superior and Lateral Rectus Myopexy for Acquired Adult Distance Esotropia: A "One Size Fits All" Surgery. Strabismus. 2017	N	0
12	10.1097/IOP.0000000000000731	Repp DJ, Rubinstein TJ, Herreid PA, Sires BS., Biomechanics of the Levator Aponeurosis. Ophthal Plast Reconstr Surg. 2017	N	0
13	10.1007/s00417-017-3817-4	De Gregorio A, Pedrotti E, Stevan G, Montali M, Morselli S., Safety and efficacy of multiple cyclocoagulation of ciliary bodies by high-intensity focused ultrasound in patients with glaucoma. Graefes Arch Clin Exp Ophthalmol. 2017	Y	1
14	10.1111/aos.13445	Ten Berge JCEM, van Dijk EHC, Schreurs MWJ, Vermeer J, Boon CJF, Rothova A., Antiretinal antibodies in central serous chorioretinopathy: prevalence and clinical implications. Acta Ophthalmol. 2018	Y	1
15	10.1007/s10072-016-2785-5	Kang H, Kim SK, Park KJ, Choi NC, Kwon OY, Lim BH., Hemianopic line bisection error in a patient with Alzheimer's disease. Neurol Sci. 2017	Y	1
16	10.1212/WNL.0000000000004312	Hennes EM, Baumann M, Schanda K, Anlar B, Bajer-Kornek B, Blaschek A, Brantner-Inthaler S, Diepold K, Eisenkölbl A, Gotwald T, Kuchukhidze G, Gruber-Sedlmayr U, Häusler M, Höftberger R, Karenfort M, Klein A, Koch J, Kraus V, Lechner C, Leiz S, Leypoldt F, Mader S, et al., Prognostic relevance of MOG antibodies in children with an acquired demyelinating syndrome. Neurology. 2017	N	0
17	10.1016/j.oftal.2016.08.006	Pareja-Ríos A, Bonaque-González S, Serrano-García M, Cabrera-López F, Abreu-Reyes P, Marrero-Saavedra MD., Tele-ophthalmology for diabetic retinopathy screening: 8 years of experience. Arch Soc Esp Oftalmol. 2017	N	0
18	10.1007/s00417-016-3530-8	Mikhail M, El-Rayes EN, Kojima K, Ajlan R, Rezende F., Catheter-guided suprachoroidal buckling of rhegmatogenous retinal detachments secondary to peripheral retinal breaks. Graefes Arch Clin Exp Ophthalmol. 2017	Y	1
19	10.1007/s00417-017-3616-y	Shah MA, Agrawal R, Teoh R, Shah SM, Patel K, Gupta S, Gosai S., Pediatric ocular trauma score as a prognostic tool in the management of pediatric traumatic cataracts. Graefes Arch Clin Exp Ophthalmol. 2017	Y	1
20	10.1016/j.jfo.2016.09.014	Zaarour K, Slim E, Antoun J, Waked N., Thick keratoconic cornea associated with posterior polymorphous corneal dystrophy. J Fr Ophtalmol. 2017	N	0
21	10.1097/IAE.0000000000001311	Shifera AS, Pennesi ME, Yang P, Lin P., ULTRA-WIDE-FIELD FUNDUS AUTOFLUORESCENCE FINDINGS IN PATIENTS WITH ACUTE ZONAL OCCULT OUTER RETINOPATHY. Retina. 2017	Y	1
22	10.1080/13816810.2017.1354384	Bryant L, Lozynska O, Han G, Morgan JIW, Gai X, Maguire AM, Aleman T, Bennett J., On variants and disease-causing mutations: Case studies of a SEMA4A variant identified in inherited blindness. Ophthalmic Genet. 2018	N	0
23	10.1097/IAE.0000000000001391	Cheung CMG, Yanagi Y, Mohla A, Lee SY, Mathur R, Chan CM, Yeo I, Wong TY., CHARACTERIZATION AND DIFFERENTIATION OF POLYPOIDAL CHOROIDAL VASCULOPATHY USING SWEPT SOURCE OPTICAL COHERENCE TOMOGRAPHY ANGIOGRAPHY. Retina. 2017	Y	1
24	10.1016/j.jcjo.2016.08.003	Lassalle S, Maschi C, Caujolle JP, Giordanengo V, Hofman P., Inverted conjunctival papilloma: a certainly underestimated high-risk lesion for carcinomatous transformation-a case report. Can J Ophthalmol. 2017	N	0
25	10.2217/epi-2017-0060	Piras IS, Mills G, Llaci L, Naymik M, Ramsey K, Belnap N, Balak CD, Jepsen WM, Szelinger S, Siniard AL, Lewis CR, LaFleur M, Richholt RF, De Both MD, Avela K, Rangasamy S, Craig DW, Narayanan V, Järvelä I, Huentelman MJ, Schrauwen I., Exploring genome-wide DNA methylation patterns in Aicardi syndrome. Epigenomics. 2017	N	0
26	10.1097/IJG.0000000000000551	Perez CI, Mellado F, Jones A, Colvin R., Trabeculectomy Combined With Collagen Matrix Implant (Ologen). J Glaucoma. 2017	Y	1
27	10.1016/j.jcjo.2016.07.015	De Oliveira PR, Berger AR, Chow DR., Optical coherence tomography angiography in chorioretinal disorders. Can J Ophthalmol. 2017	N	0
28	10.1016/j.jneuroim.2017.07.006	Yoshikura N, Kimura A, Hayashi Y, Inuzuka T., Anti-C1q autoantibodies in patients with neuromyelitis optica spectrum disorders. J Neuroimmunol. 2017	N	0
29	10.1097/SCS.0000000000003431	Na J, Choi SY, Baek S, Lee H., Hemorrhage and Infarction of the Conjunctiva and Orbit in Essential Thrombocythemia. J Craniofac Surg. 2017	Y	1
30	10.1097/ICB.0000000000000374	Despréaux R, Mrejen S, Quentel G, Cohen SY., EN FACE OPTICAL COHERENCE TOMOGRAPHY (OCT) AND OCT ANGIOGRAPHY FINDINGS IN RETINAL ASTROCYTIC HAMARTOMAS. Retin Cases Brief Rep. 2017	N	0
31	10.1136/bjophthalmol-2016-309996	Dagi LR, MacKinnon S, Zurakowski D, Prabhu SP., Rectus muscle excyclorotation and V-pattern strabismus: a quantitative appraisal of clinical relevance in syndromic craniosynostosis. Br J Ophthalmol. 2017	Y	1
32	10.1097/IAE.0000000000001351	Medina CA, Ortiz AG, Relhan N, Smiddy WE, Townsend JH, Flynn HW Jr., MACULAR HOLE AFTER PARS PLANA VITRECTOMY FOR RHEGMATOGENOUS RETINAL DETACHMENT. Retina. 2017	Y	1
33	10.1080/09286586.2016.1257027	Malkin AG, Goldstein JE, Massof RW., Multivariable Regression Model of the EuroQol 5-Dimension Questionnaire in Patients Seeking Outpatient Low Vision Rehabilitation. Ophthalmic Epidemiol. 2017	N	0
34	10.1007/s00018-017-2643-5	Kudo A., Introductory review: periostin-gene and protein structure. Cell Mol Life Sci. 2017	Y	1
35	10.1080/02713683.2017.1344712	Wang T, Zhu L, Peng Y, Shen N, Yu Y, Yao M, Zhu J., Photochemical Cross-Linking for Penetrating Corneal Wound Closure in Enucleated Porcine Eyes. Curr Eye Res. 2017	N	0
36	10.1093/brain/awx219	Gerber S, Charif M, Chevrollier A, Chaumette T, Angebault C, Kane MS, Paris A, Alban J, Quiles M, Delettre C, Bonneau D, Procaccio V, Amati-Bonneau P, Reynier P, Leruez S, Calmon R, Boddaert N, Funalot B, Rio M, Bouccara D, Meunier I, Sesaki H, et al., Mutations in DNM1L, as in OPA1, result indominant optic atrophy despite opposite effectson mitochondrial fusion and fission. Brain. 2017	Y	1
37	10.1097/IAE.0000000000001683	Cheng YC, Shen JH, Chao AN, Chen KJ., Later Development of Posterior Staphyloma in Choroidal Osteoma With Choroidal Neovascularization. Retina. 2017	Y	1
38	10.2174/1567202614666161104115440	Shimazawa M, Inoue Y, Masuda T, Onodera R, Tahara K, Shimizu Y, Mibe Y, Tsuruma K, Takeuchi H, Hara H., Topical Diclofenac-Loaded Liposomes Ameliorate Laser-Induced Choroidal Neovascularization in Mice and Non-Human Primates. Curr Neurovasc Res. 2017	Y	1
39	10.1007/s00405-016-4308-7	Ozsutcu M, Balci O, Tanriverdi C, Demirci G., Efficacy of adjunctive mitomycin C in transcanalicular diode laser dacryocystorhinostomy. Eur Arch Otorhinolaryngol. 2017	Y	1
40	10.1136/bjophthalmol-2016-309775	Aixinjueluo W, Usui T, Miyai T, Toyono T, Sakisaka T, Yamagami S., Accelerated transepithelial corneal cross-linking for progressive keratoconus: a prospective study of 12 months. Br J Ophthalmol. 2017	Y	1
41	10.1016/j.ijporl.2016.11.027	Yin T, van der Meer G., Neonatal airway obstruction in bilateral congenital dacryocystocoele: Case report and review of the literature. Int J Pediatr Otorhinolaryngol. 2017	N	0
42	10.1007/s00417-017-3860-1	Chan JCW, Choy BNK, Chan OCC, Li KKW., Early intraocular pressure change after peripheral iridotomy with ultralow fluence pattern scanning laser and Nd:YAG laser in primary angle-closure suspect: Kowloon East Pattern Scanning Laser Study Report No. 3. Graefes Arch Clin Exp Ophthalmol. 2018	Y	1
43	10.1136/bjophthalmol-2016-309245	Sharma S, Ang M, Najjar RP, Sng C, Cheung CY, Rukmini AV, Schmetterer L, Milea D., Optical coherence tomography angiography in acute non-arteritic anterior ischaemic optic neuropathy. Br J Ophthalmol. 2017	Y	1
44	10.1080/01676830.2017.1279664	Medel R, Balaguer Solé Ò, Vasquez LM., Inferior tarsal muscle-conjunctivectomy for reverse ptosis repair: A novel technique. Orbit. 2017	N	0
45	10.1038/eye.2017.25	Betts T, Ahmed S, Maguire S, Watts P., Characteristics of non-vitreoretinal ocular injury in child maltreatment: a systematic review. Eye (Lond). 2017	N	0
46	10.1007/s10792-016-0261-0	Altunel O, Duru N, Goktas A, Ozkose A, Goktas E, Atas M., Evaluation of foveal photoreceptor layer in eyes with macular edema associated with branch retinal vein occlusion after ozurdex treatment. Int Ophthalmol. 2017	Y	1
47	10.1159/000478705	Motohashi R, Noma H, Yasuda K, Kotake O, Goto H, Shimura M., Dynamics of Inflammatory Factors in Aqueous Humor during Ranibizumab or Aflibercept Treatment for Age-Related Macular Degeneration. Ophthalmic Res. 2017	Y	1
48	10.1016/j.jns.2017.01.033	Kang S, Shaikh AG., Acquired pendular nystagmus. J Neurol Sci. 2017	N	0
49	10.1097/WNO.0000000000000503	Sadaka A, Schockman SL, Golnik KC., Evaluation of Horner Syndrome in the MRI Era. J Neuroophthalmol. 2017	N	0
50	10.1136/bjophthalmol-2016-310105	Jirawison C, Liu Y, Surasit K, Maningding E, Kamphaengkham S, Ausayakhun S, Heiden D, Margolis TP, Gonzales JA, Acharya NR, Keenan JD., Fundus findings in a series of patients with extrapulmonary tuberculosis in Thailand. Br J Ophthalmol. 2017	Y	1
51	10.1016/j.neuroimage.2016.12.053	Pelland M, Orban P, Dansereau C, Lepore F, Bellec P, Collignon O., State-dependent modulation of functional connectivity in early blind individuals. Neuroimage. 2017	Y	1
52	10.1097/ICO.0000000000001130	Zhang X, Bitar M, Davis RM., Spontaneous Canalicular Plug Erosion After Punctal Plug Placement. Cornea. 2017	Y	1
53	10.3928/23258160-20171030-04	Stephens JD, Adam MK, Todorich B, Faia LJ, Garg S, Dunn JP, Mehta S., Optical Coherence Tomography Findings in Endogenous Fungal Chorioretinitis, Retinitis, and Endophthalmitis. Ophthalmic Surg Lasers Imaging Retina. 2017	Probably yes, if I would have registered to Healio.com	0
54	10.1097/ICL.0000000000000297	Hashemi H, Rastad H, Emamian MH, Fotouhi A., Floppy Eyelid Syndrome and Its Determinants in Iranian Adults: A Population-Based Study. Eye Contact Lens. 2017	N	0
55	10.1177/2165079916686592	Lurati AR., Identifying Personal Risk Factors for Falls in the Workplace. Workplace Health Saf. 2017	N	0
56	10.1016/j.ad.2016.07.006	Miura T, Ohtsuka M, Yamamoto T., Sweet's syndrome-like eruption in association with the exacerbation of Behçet's disease after the Great East Japan Earthquake. Actas Dermosifiliogr. 2017	N	0
57	10.1001/jamaophthalmol.2017.1009	Borkar DS, Homayounfar G, Tham VM, Ray KJ, Vinoya AC, Uchida A, Acharya NR., Association Between Thyroid Disease and Uveitis: Results From the Pacific Ocular Inflammation Study. JAMA Ophthalmol. 2017	Y	1
58	10.1111/opo.12332	Li SM, Kang MT, Wu SS, Meng B, Sun YY, Wei SF, Liu L, Peng X, Chen Z, Zhang F, Wang N., Studies using concentric ring bifocal and peripheral add multifocal contact lenses to slow myopia progression in school-aged children: a meta-analysis. Ophthalmic Physiol Opt. 2017	N	0
59	10.1097/IAE.0000000000001666	Hwang CK, Kolomeyer AM, Brucker AJ, Morgan JIW, Nichols CW, Aleman TS., Localized Bilateral Juxtafoveal Photoreceptor Loss in POEMS: A New Association. Retina. 2017	Y	1
60	10.1159/000473701	Daien V, Le Pape A, Heve D, Villain M, Bremond Gignac D; Collaborators of the Epidemiology and Safety Program (EPISAFE).., Incidence and Characteristics of Congenital Cataract Surgery in France from 2010 to 2012: The EPISAFE Program. Ophthalmic Res. 2017	N	0
61	10.2337/db16-1364	Simó R, Hernández C., GLP-1R as a Target for the Treatment of Diabetic Retinopathy: Friend or Foe? Diabetes. 2017	Y	1
62	10.1016/j.ajo.2016.11.009	Ares WJ, Tonetti D, Yu JY, Monaco EA, Flickinger JC, Lunsford LD., Gamma Knife Radiosurgery for Uveal Metastases: Report of Three Cases and a Review of the Literature. Am J Ophthalmol. 2017	Y	1
63	10.1007/s40618-017-0608-z	Bartalena L, Veronesi G, Krassas GE, Wiersinga WM, Marcocci C, Marinò M, Salvi M, Daumerie C, Bournaud C, Stahl M, Sassi L, Azzolini C, Boboridis KG, Mourits MP, Soeters MR, Baldeschi L, Nardi M, Currò N, Boschi A, Bernard M, von Arx G, Perros P, et al., Does early response to intravenous glucocorticoids predict the final outcome in patients with moderate-to-severe and active Graves' orbitopathy?…	Y	1
64	10.1016/j.jneuroim.2017.08.003	Palterer B, Brugnolo F, Sieni E, Barilaro A, Parronchi P., Neuromyelitis optica, atypical hemophagocytic lymphohistiocytosis and heterozygous perforin A91V mutation. J Neuroimmunol. 2017	N	0
65	10.1111/ped.13149	Demircioğlu Kılıc B, Akbalık Kara M, Ozcelik AA, Ustunsoy H, Balat A., Brachial artery pseudoaneurysm: Rare finding in childhood Behcet's disease. Pediatr Int. 2017	N	0
66	10.3233/JAD-161190	Shellington EM, Heath M, Gill DP, Petrella RJ., Long-Term Maintenance of Executive-Related Oculomotor Improvements in Older Adults with Self-Reported Cognitive Complaints Following a 24-Week Multiple Modality Exercise Program. J Alzheimers Dis. 2017	N	0
67	10.1055/s-0043-100116	Li J, Cai Y, Sun X, Yao D, Xia J., MiR-346 and TRAb as Predicative Factors for Relapse in Graves' Disease Within One Year. Horm Metab Res. 2017	N	0
68	10.1097/ICO.0000000000001100	Farooq AV., Herpes Simplex Virus Keratitis and Resistance to Acyclovir. Cornea. 2017	Y	1
69	10.1080/02713683.2017.1341534	Modrzejewska M, Wiącek MP., A Novel Approach to the Differentiation of Intrabulbar Tumors in Color Doppler Imaging. Curr Eye Res. 2017	N	0
70	10.1080/02713683.2017.1358373	Yamada Y, Suzuma K, Onizuka N, Uematsu M, Mohamed YH, Kitaoka T., Evaluation of retinal blood flow before and after panretinal photocoagulation using pattern scan laser for diabetic retinopathy. Curr Eye Res. 2017	N	0
71	10.1097/IOP.0000000000000723	Chisholm SAM, Couch SM, Custer PL., Etiology and Management of Allergic Eyelid Dermatitis. Ophthal Plast Reconstr Surg. 2017	N	0
72	10.1016/j.expneurol.2016.08.004	Eapen BC, Murphy DP, Cifu DX., Neuroprosthetics in amputee and brain injury rehabilitation. Exp Neurol. 2017	N	0
73	10.1136/bjophthalmol-2016-309460	Bhardwaj M, Sen S, Chosdol K, Sharma A, Pushker N, Kashyap S, Bakhshi S, Bajaj MS., miRNA-200c and miRNA-141 as potential prognostic biomarkers and regulators of epithelial-mesenchymal transition in eyelid sebaceous gland carcinoma. Br J Ophthalmol. 2017	Y	1
74	10.1136/jnnp-2017-315782	Evoli A, Alboini PE, Iorio R, Damato V, Bartoccioni E., Pattern of ocular involvement in myasthenia gravis with MuSK antibodies. J Neurol Neurosurg Psychiatry. 2017	Y	1
75	10.3928/01913913-20170309-01	Rajavi Z, Feizi M, Behradfar N, Yaseri M, Sayanjali S, Motevaseli T, Sabbaghi H, Faghihi M., Inferior Oblique Overaction: Anterior Transposition Versus Myectomy. J Pediatr Ophthalmol Strabismus. 2017	N	0
76	10.1080/02713683.2016.1223317	Jia Y, Hu DN, Sun J, Zhou J., Correlations Between MMPs and TIMPs Levels in Aqueous Humor from High Myopia and Cataract Patients. Curr Eye Res. 2017	N	0
77	10.1097/IOP.0000000000000536	Cole SC, Eftekhari K, Oberg T, Mamalis N, Anderson RL., Osteolytic Sarcoidosis of the Orbital Roof Masquerading as a Malignant Orbital Lesion. Ophthal Plast Reconstr Surg. 2017	N	0
78	10.1111/desc.12379	Hadad BS, Maurer D, Lewis TL., The role of early visual input in the development of contour interpolation: the case of subjective contours. Dev Sci. 2017	N	0
79	10.3109/13816810.2016.1164192	Topçu V, Alp MY, Alp CK, Bakır A, Geylan D, Yılmazoğlu MÖ., A new familial case of Jalili syndrome caused by a novel mutation in CNNM4. Ophthalmic Genet. 2017	N	0
80	10.1016/j.ophtha.2017.07.010	Pflugfelder SC, de Paiva CS., The Pathophysiology of Dry Eye Disease: What We Know and Future Directions for Research. Ophthalmology. 2017	Y	1
81	10.14670/HH-11-820	Kimura A, Namekata K, Guo X, Harada C, Harada T., Dock3-NMDA receptor interaction as a target for glaucoma therapy. Histol Histopathol. 2017	N	0
82	10.1016/j.oftal.2016.03.021	Cañizares B, Yago I, Piñero Á, Ruiz M., Unilateral persistent fetal vasculature coexisting with anterior segment dysgenesia. Arch Soc Esp Oftalmol. 2017	N	0
83	10.1136/jmedgenet-2016-104212	Gerber S, Ding MG, Gérard X, Zwicker K, Zanlonghi X, Rio M, Serre V, Hanein S, Munnich A, Rotig A, Bianchi L, Amati-Bonneau P, Elpeleg O, Kaplan J, Brandt U, Rozet JM., Compound heterozygosity for severe and hypomorphic NDUFS2 mutations cause non-syndromic LHON-like optic neuropathy. J Med Genet. 2017	Y	1
84	10.1093/hmg/ddx168	Whitman MC, Engle EC., Ocular congenital cranial dysinnervation disorders (CCDDs): insights into axon growth and guidance. Hum Mol Genet. 2017	Y	1
85	10.1016/j.ophtha.2017.01.027	Wu Z, Saunders LJ, Daga FB, Diniz-Filho A, Medeiros FA., Frequency of Testing to Detect Visual Field Progression Derived Using a Longitudinal Cohort of Glaucoma Patients. Ophthalmology. 2017	Y	1
86	10.1038/eye.2017.34	Midena E, Pilotto E., Microperimetry in age: related macular degeneration. Eye (Lond). 2017	Y	1
87	10.1097/IOP.0000000000000806	Hirabayashi KE, Kalin-Hajdu E, Brodie FL, Kersten RC, Russell MS, Vagefi MR., Retrobulbar Injection of Amphotericin B for Orbital Mucormycosis. Ophthal Plast Reconstr Surg. 2017	N	0
88	10.1097/ICU.0000000000000456	Sozeri Y, Salim S., Anticlotting agents and the surgical management of glaucoma. Curr Opin Ophthalmol. 2018	Y	1
89	10.1097/IAE.0000000000001368	Yong Huang X, Wu N, Li N, Wang Y, Shakoor A., Diagnostic and Therapeutic Challenges. Retina. 2017	Y	1
90	10.1007/s12031-016-0869-6	D'Amico AG, Maugeri G, Bucolo C, Saccone S, Federico C, Cavallaro S, D'Agata V., Nap Interferes with Hypoxia-Inducible Factors and VEGF Expression in Retina of Diabetic Rats. J Mol Neurosci. 2017	Y	1
91	10.1097/ICO.0000000000001129	Nakagawa H, Hattori T, Koike N, Ehara T, Narimatsu A, Kumakura S, Matsumoto T, Goto H., Number of Bacteria and Time of Coincubation With Bacteria Required for the Development of Acanthamoeba Keratitis. Cornea. 2017	Y	1
92	10.1097/IAE.0000000000001408	Pertl L, Haas A, Hausberger S, Pichler T, Rabensteiner DF, Seidel G, Malle EM, Weger M., CHANGE OF CHOROIDAL VOLUME IN UNTREATED CENTRAL SEROUS CHORIORETINOPATHY. Retina. 2017	Y	1
93	10.1002/dmrr.2860	Omori Y, Yanagisawa K, Sato A, Uchigata Y., The importance of nonstop treatment after delivery for pregnant women with type 2 diabetes. Diabetes Metab Res Rev. 2017	N	0
94	10.1016/j.anai.2017.01.027	Bork K, Brehler R, Witzke G, Boor S, Heineke W, Hardt J., Blindness, tetraspasticity, and other signs of irreversible brain damage in hereditary angioedema. Ann Allergy Asthma Immunol. 2017	N	0
95	10.1007/s10067-016-3417-4	Vitale A, Emmi G, Lopalco G, Gentileschi S, Silvestri E, Fabiani C, Urban ML, Frediani B, Galeazzi M, Iannone F, Rigante D, Cantarini L., Adalimumab effectiveness in Behçet's disease: short and long-term data from a multicenter retrospective observational study. Clin Rheumatol. 2017	Y	1
96	10.1038/nprot.2017.032	Lückoff A, Scholz R, Sennlaub F, Xu H, Langmann T., Comprehensive analysis of mouse retinal mononuclear phagocytes. Nat Protoc. 2017	Y	1
97	10.1097/ICO.0000000000001038	Micali A, Roszkowska AM, Postorino EI, Rania L, Aragona E, Wylegala E, Nowinska A, Ieni A, Calimeri S, Pisani A, Aragona P, Puzzolo D., Comparative Confocal and Histopathological Study of Corneal Changes in Multiple Myeloma. Cornea. 2017	Y	1
98	10.1097/ICU.0000000000000385	Daya SM., Conjunctival-limbal autograft. Curr Opin Ophthalmol. 2017	Y	1
99	10.1007/s10384-016-0490-9	Shalaby U., Diltiazem co treatment with cyclosporine for induction of disease remission in sight-threatening non-infectious intraocular inflammation. Jpn J Ophthalmol. 2017	Y	1
100	10.1016/j.ajo.2016.12.023	Tavares Ferreira J, Proença R, Alves M, Dias-Santos A, Santos BO, Cunha JP, Papoila AL, Abegão Pinto L., Retina and Choroid of Diabetic Patients Without Observed Retinal Vascular Changes: A Longitudinal Study. Am J Ophthalmol. 2017	Y	1
101	10.1016/j.jcjo.2016.07.026	Eom Y, Song JS, Kim HM., Spectacle plane add power of multifocal intraocular lenses according to effective lens position. Can J Ophthalmol. 2017	N	0
102	10.1097/IAE.0000000000001401	Tye A, Klufas MA, McCannel CA, McCannel TA., Intracameral Air in Phacovitrectomy for Maintaining Intraocular Lens Position. Retina. 2017	Y	1
103	10.1111/aos.13385	Jacobsen AG, Brost B, Vorum H, Hargitai J., Functional benefits and patient satisfaction with upper blepharoplasty - evaluated by objective and subjective outcome measures. Acta Ophthalmol. 2017	Y	1
104	10.1136/bjophthalmol-2016-309504	Himori N, Kunikata H, Kawasaki R, Shiga Y, Omodaka K, Takahashi H, Miyata T, Nakazawa T., The association between skin autofluorescence and mean deviation in patients with open-angle glaucoma. Br J Ophthalmol. 2017	Y	1
105	10.1007/s00417-017-3696-8	Callizo J, Pfeiffer S, Lahme E, van Oterendorp C, Khattab M, Bemme S, Kulanga M, Hoerauf H, Feltgen N., Risk of progression in macula-on rhegmatogenous retinal detachment. Graefes Arch Clin Exp Ophthalmol. 2017	Y	1
106	10.1111/cup.12909	Motaparthi K., Pseudoherpetic transient acantholytic dermatosis (Grover disease): case series and review of the literature. J Cutan Pathol. 2017	Y	1
107	10.1097/IOP.0000000000000837	Charles NC, Jakobiec FA, Patel P., Periorbital Dermoid Cyst With Unique Trichilemmal Differentiation. Ophthal Plast Reconstr Surg. 2017	N	0
108	10.1080/09286586.2016.1255763	Sasongko MB, Agni AN, Wardhana FS, Kotha SP, Gupta P, Widayanti TW, Supanji, Widyaputri F, Widyaningrum R, Wong TY, Kawasaki R, Wang JJ, Pawiroranu S., Rationale and Methodology for a Community-Based Study of Diabetic Retinopathy in an Indonesian Population with Type 2 Diabetes Mellitus: The Jogjakarta Eye Diabetic Study in the Community. Ophthalmic Epidemiol. 2017	N	0
109	10.1111/jnc.14070	Bordone MP, González Fleitas MF, Pasquini LA, Bosco A, Sande PH, Rosenstein RE, Dorfman D., Involvement of microglia in early axoglial alterations of the optic nerve induced by experimental glaucoma. J Neurochem. 2017	Y	1
110	10.1016/j.ajpath.2017.08.025	Kumar S, Nakashizuka H, Jones A, Lambert A, Zhao X, Shen M, Parker M, Wang S, Berriochoa Z, Fnu A, VanBeuge S, Chévez-Barrios P, Tso M, Rainier J, Fu Y., Proteolytic Degradation and Inflammation Play Critical Roles in Polypoidal Choroidal Vasculopathy. Am J Pathol. 2017	Y	1
111	10.1017/S0031182017000270	Chen SJ, Zhang YX, Huang SG, Lu FL., Galectins expressed differently in genetically susceptible C57BL/6 and resistant BALB/c mice during acute ocular Toxoplasma gondii infection. Parasitology. 2017	N	0
112	10.1111/aos.13226	Wirth MA, Freiberg F, Pfau M, Wons J, Becker MD, Michels S., Optical coherence tomography angiography in age-related macular degeneration: persistence of vascular network in quiescent choroidal neovascularization. Acta Ophthalmol. 2017	Y	1
113	10.1136/bjophthalmol-2015-307837	Dhalla K, Cousens S, Murdoch IE., Phacoemulsification compared with phacotrabeculectomy surgery: a within-person observational cohort study. Br J Ophthalmol. 2017	Y	1
114	10.3171/2016.12.SPINE16540	Ibrahim TF, Sweis RT, Nockels RP., Reversible postoperative blindness caused by bilateral status epilepticus amauroticus following thoracolumbar deformity correction: case report. J Neurosurg Spine. 2017	Y	1
115	10.1097/ICO.0000000000001263	Oliva-Biénzobas V, Navas A, C Astiazarán M, Chacón-Camacho OF, A Bermúdez-Magner J, Takane M, Graue-Hernández E, Zenteno JC., CYP1B1 Cytopathy: Uncommon Phenotype of a Homozygous CYP1B1 Deletion as Internal Corneal Ulcer of Von Hippel. Cornea. 2017	Y	1
Total				63
				63

## Sheet: Australia
ID Number (please do not modify)	Digital Object Identifier (DOI)	Reference	Access to Full text (Y/N)	Column 0/1
1	10.1016/j.neulet.2016.12.057	Azuchi Y, Kimura A, Guo X, Akiyama G, Noro T, Harada C, Nishigaki A, Namekata K, Harada T., Valproic acid and ASK1 deficiency ameliorate optic neuritis and neurodegeneration in an animal model of multiple sclerosis. Neurosci Lett. 2017	Y	1
2	10.1111/cge.12895	Kletke S, Batmanabane V, Dai T, Vincent A, Li S, Gordon KA, Papsin BC, Cushing SL, Héon E., The combination of vestibular impairment and congenital sensorineural hearing loss predisposes patients to ocular anomalies, including Usher syndrome. Clin Genet. 2017	Y	1
3	10.1097/DSS.0000000000000787	Martínez-Palmer A, Calsina-Prat M, Ormaechea N, Toll A., Reconstruction of Combined Upper and Lower Eyelid Defects in a Patient With Lentigo Maligna. Dermatol Surg. 2017	N	0
4	10.1093/brain/awx236	Niturad CE, Lev D, Kalscheuer VM, Charzewska A, Schubert J, Lerman-Sagie T, Kroes HY, Oegema R, Traverso M, Specchio N, Lassota M, Chelly J, Bennett-Back O, Carmi N, Koffler-Brill T, Iacomino M, Trivisano M, Capovilla G, Striano P, Nawara M, Rzonca S, Fischer U, et al., Rare GABRA3 variants are associated with epileptic seizures, encephalopathy and dysmorphic features. Brain. 2017	Y	1
5	10.1080/13816810.2016.1188124	Tyagi P, Juma Z, Reddy AR., Retinal features in Mulvihill-Smith syndrome. Ophthalmic Genet. 2017	Y	1
6	10.1097/WNO.0000000000000455	Mendes Marques NBPS, Barros SR, Miranda AF, Nobre Cardoso J, Parreira S, Fonseca T, Donaire NM, Campos N., Horizontal Gaze Palsy and Progressive Scoliosis With ROBO 3 Mutations in Patients From Cape Verde. J Neuroophthalmol. 2017	N	0
7	10.1080/09286586.2017.1313992	Oye J, Mactaggart I, Polack S, Schmidt E, Tamo V, Okwen M, Kuper H., Prevalence and Causes of Visual Impairment in Fundong District, North West Cameroon: Results of a Population-Based Survey. Ophthalmic Epidemiol. 2017	Y	1
8	10.1016/j.clae.2017.01.003	Gifford K, Gifford P, Hendicott PL, Schmid KL., Near binocular visual function in young adult orthokeratology versus soft contact lens wearers. Cont Lens Anterior Eye. 2017	Y	1
9	10.2217/bmm-2017-0218	Wostyn P, De Deyn PP., Intracranial pressure-induced optic nerve sheath response as a predictive biomarker for optic disc edema in astronauts. Biomark Med. 2017	N	0
10	10.1097/WNO.0000000000000555	Morrow MJ, Ko MW., Should Oral Corticosteroids Be Used to Treat Demyelinating Optic Neuritis? J Neuroophthalmol. 2017	N	0
11	10.1080/09273972.2017.1349816	Morad Y, Pras E, Nemet A., Superior and Lateral Rectus Myopexy for Acquired Adult Distance Esotropia: A "One Size Fits All" Surgery. Strabismus. 2017	Y	1
12	10.1097/IOP.0000000000000731	Repp DJ, Rubinstein TJ, Herreid PA, Sires BS., Biomechanics of the Levator Aponeurosis. Ophthal Plast Reconstr Surg. 2017	N	0
13	10.1007/s00417-017-3817-4	De Gregorio A, Pedrotti E, Stevan G, Montali M, Morselli S., Safety and efficacy of multiple cyclocoagulation of ciliary bodies by high-intensity focused ultrasound in patients with glaucoma. Graefes Arch Clin Exp Ophthalmol. 2017	Y	1
14	10.1111/aos.13445	Ten Berge JCEM, van Dijk EHC, Schreurs MWJ, Vermeer J, Boon CJF, Rothova A., Antiretinal antibodies in central serous chorioretinopathy: prevalence and clinical implications. Acta Ophthalmol. 2018	Y	1
15	10.1007/s10072-016-2785-5	Kang H, Kim SK, Park KJ, Choi NC, Kwon OY, Lim BH., Hemianopic line bisection error in a patient with Alzheimer's disease. Neurol Sci. 2017	Y	1
16	10.1212/WNL.0000000000004312	Hennes EM, Baumann M, Schanda K, Anlar B, Bajer-Kornek B, Blaschek A, Brantner-Inthaler S, Diepold K, Eisenkölbl A, Gotwald T, Kuchukhidze G, Gruber-Sedlmayr U, Häusler M, Höftberger R, Karenfort M, Klein A, Koch J, Kraus V, Lechner C, Leiz S, Leypoldt F, Mader S, et al., Prognostic relevance of MOG antibodies in children with an acquired demyelinating syndrome. Neurology. 2017	N	0
17	10.1016/j.oftal.2016.08.006	Pareja-Ríos A, Bonaque-González S, Serrano-García M, Cabrera-López F, Abreu-Reyes P, Marrero-Saavedra MD., Tele-ophthalmology for diabetic retinopathy screening: 8 years of experience. Arch Soc Esp Oftalmol. 2017	N	0
18	10.1007/s00417-016-3530-8	Mikhail M, El-Rayes EN, Kojima K, Ajlan R, Rezende F., Catheter-guided suprachoroidal buckling of rhegmatogenous retinal detachments secondary to peripheral retinal breaks. Graefes Arch Clin Exp Ophthalmol. 2017	Y	1
19	10.1007/s00417-017-3616-y	Shah MA, Agrawal R, Teoh R, Shah SM, Patel K, Gupta S, Gosai S., Pediatric ocular trauma score as a prognostic tool in the management of pediatric traumatic cataracts. Graefes Arch Clin Exp Ophthalmol. 2017	Y	1
20	10.1016/j.jfo.2016.09.014	Zaarour K, Slim E, Antoun J, Waked N., Thick keratoconic cornea associated with posterior polymorphous corneal dystrophy. J Fr Ophtalmol. 2017	N	0
21	10.1097/IAE.0000000000001311	Shifera AS, Pennesi ME, Yang P, Lin P., ULTRA-WIDE-FIELD FUNDUS AUTOFLUORESCENCE FINDINGS IN PATIENTS WITH ACUTE ZONAL OCCULT OUTER RETINOPATHY. Retina. 2017	Y	1
22	10.1080/13816810.2017.1354384	Bryant L, Lozynska O, Han G, Morgan JIW, Gai X, Maguire AM, Aleman T, Bennett J., On variants and disease-causing mutations: Case studies of a SEMA4A variant identified in inherited blindness. Ophthalmic Genet. 2018	Y	1
23	10.1097/IAE.0000000000001391	Cheung CMG, Yanagi Y, Mohla A, Lee SY, Mathur R, Chan CM, Yeo I, Wong TY., CHARACTERIZATION AND DIFFERENTIATION OF POLYPOIDAL CHOROIDAL VASCULOPATHY USING SWEPT SOURCE OPTICAL COHERENCE TOMOGRAPHY ANGIOGRAPHY. Retina. 2017	Y	1
24	10.1016/j.jcjo.2016.08.003	Lassalle S, Maschi C, Caujolle JP, Giordanengo V, Hofman P., Inverted conjunctival papilloma: a certainly underestimated high-risk lesion for carcinomatous transformation-a case report. Can J Ophthalmol. 2017	Y	1
25	10.2217/epi-2017-0060	Piras IS, Mills G, Llaci L, Naymik M, Ramsey K, Belnap N, Balak CD, Jepsen WM, Szelinger S, Siniard AL, Lewis CR, LaFleur M, Richholt RF, De Both MD, Avela K, Rangasamy S, Craig DW, Narayanan V, Järvelä I, Huentelman MJ, Schrauwen I., Exploring genome-wide DNA methylation patterns in Aicardi syndrome. Epigenomics. 2017	N	0
26	10.1097/IJG.0000000000000551	Perez CI, Mellado F, Jones A, Colvin R., Trabeculectomy Combined With Collagen Matrix Implant (Ologen). J Glaucoma. 2017	Y	1
27	10.1016/j.jcjo.2016.07.015	De Oliveira PR, Berger AR, Chow DR., Optical coherence tomography angiography in chorioretinal disorders. Can J Ophthalmol. 2017	Y	1
28	10.1016/j.jneuroim.2017.07.006	Yoshikura N, Kimura A, Hayashi Y, Inuzuka T., Anti-C1q autoantibodies in patients with neuromyelitis optica spectrum disorders. J Neuroimmunol. 2017	Y	1
29	10.1097/SCS.0000000000003431	Na J, Choi SY, Baek S, Lee H., Hemorrhage and Infarction of the Conjunctiva and Orbit in Essential Thrombocythemia. J Craniofac Surg. 2017	N	0
30	10.1097/ICB.0000000000000374	Despréaux R, Mrejen S, Quentel G, Cohen SY., EN FACE OPTICAL COHERENCE TOMOGRAPHY (OCT) AND OCT ANGIOGRAPHY FINDINGS IN RETINAL ASTROCYTIC HAMARTOMAS. Retin Cases Brief Rep. 2017	N	0
31	10.1136/bjophthalmol-2016-309996	Dagi LR, MacKinnon S, Zurakowski D, Prabhu SP., Rectus muscle excyclorotation and V-pattern strabismus: a quantitative appraisal of clinical relevance in syndromic craniosynostosis. Br J Ophthalmol. 2017	Y	1
32	10.1097/IAE.0000000000001351	Medina CA, Ortiz AG, Relhan N, Smiddy WE, Townsend JH, Flynn HW Jr., MACULAR HOLE AFTER PARS PLANA VITRECTOMY FOR RHEGMATOGENOUS RETINAL DETACHMENT. Retina. 2017	Y	1
33	10.1080/09286586.2016.1257027	Malkin AG, Goldstein JE, Massof RW., Multivariable Regression Model of the EuroQol 5-Dimension Questionnaire in Patients Seeking Outpatient Low Vision Rehabilitation. Ophthalmic Epidemiol. 2017	Y	1
34	10.1007/s00018-017-2643-5	Kudo A., Introductory review: periostin-gene and protein structure. Cell Mol Life Sci. 2017	Y	1
35	10.1080/02713683.2017.1344712	Wang T, Zhu L, Peng Y, Shen N, Yu Y, Yao M, Zhu J., Photochemical Cross-Linking for Penetrating Corneal Wound Closure in Enucleated Porcine Eyes. Curr Eye Res. 2017	Y	1
36	10.1093/brain/awx219	Gerber S, Charif M, Chevrollier A, Chaumette T, Angebault C, Kane MS, Paris A, Alban J, Quiles M, Delettre C, Bonneau D, Procaccio V, Amati-Bonneau P, Reynier P, Leruez S, Calmon R, Boddaert N, Funalot B, Rio M, Bouccara D, Meunier I, Sesaki H, et al., Mutations in DNM1L, as in OPA1, result indominant optic atrophy despite opposite effectson mitochondrial fusion and fission. Brain. 2017	Y	1
37	10.1097/IAE.0000000000001683	Cheng YC, Shen JH, Chao AN, Chen KJ., Later Development of Posterior Staphyloma in Choroidal Osteoma With Choroidal Neovascularization. Retina. 2017	Y	1
38	10.2174/1567202614666161104115440	Shimazawa M, Inoue Y, Masuda T, Onodera R, Tahara K, Shimizu Y, Mibe Y, Tsuruma K, Takeuchi H, Hara H., Topical Diclofenac-Loaded Liposomes Ameliorate Laser-Induced Choroidal Neovascularization in Mice and Non-Human Primates. Curr Neurovasc Res. 2017	N	0
39	10.1007/s00405-016-4308-7	Ozsutcu M, Balci O, Tanriverdi C, Demirci G., Efficacy of adjunctive mitomycin C in transcanalicular diode laser dacryocystorhinostomy. Eur Arch Otorhinolaryngol. 2017	Y	1
40	10.1136/bjophthalmol-2016-309775	Aixinjueluo W, Usui T, Miyai T, Toyono T, Sakisaka T, Yamagami S., Accelerated transepithelial corneal cross-linking for progressive keratoconus: a prospective study of 12 months. Br J Ophthalmol. 2017	N	0
41	10.1016/j.ijporl.2016.11.027	Yin T, van der Meer G., Neonatal airway obstruction in bilateral congenital dacryocystocoele: Case report and review of the literature. Int J Pediatr Otorhinolaryngol. 2017	Y	1
42	10.1007/s00417-017-3860-1	Chan JCW, Choy BNK, Chan OCC, Li KKW., Early intraocular pressure change after peripheral iridotomy with ultralow fluence pattern scanning laser and Nd:YAG laser in primary angle-closure suspect: Kowloon East Pattern Scanning Laser Study Report No. 3. Graefes Arch Clin Exp Ophthalmol. 2018	Y	1
43	10.1136/bjophthalmol-2016-309245	Sharma S, Ang M, Najjar RP, Sng C, Cheung CY, Rukmini AV, Schmetterer L, Milea D., Optical coherence tomography angiography in acute non-arteritic anterior ischaemic optic neuropathy. Br J Ophthalmol. 2017	Y	1
44	10.1080/01676830.2017.1279664	Medel R, Balaguer Solé Ò, Vasquez LM., Inferior tarsal muscle-conjunctivectomy for reverse ptosis repair: A novel technique. Orbit. 2017	Y	1
45	10.1038/eye.2017.25	Betts T, Ahmed S, Maguire S, Watts P., Characteristics of non-vitreoretinal ocular injury in child maltreatment: a systematic review. Eye (Lond). 2017	Y	1
46	10.1007/s10792-016-0261-0	Altunel O, Duru N, Goktas A, Ozkose A, Goktas E, Atas M., Evaluation of foveal photoreceptor layer in eyes with macular edema associated with branch retinal vein occlusion after ozurdex treatment. Int Ophthalmol. 2017	Y	1
47	10.1159/000478705	Motohashi R, Noma H, Yasuda K, Kotake O, Goto H, Shimura M., Dynamics of Inflammatory Factors in Aqueous Humor during Ranibizumab or Aflibercept Treatment for Age-Related Macular Degeneration. Ophthalmic Res. 2017	N	0
48	10.1016/j.jns.2017.01.033	Kang S, Shaikh AG., Acquired pendular nystagmus. J Neurol Sci. 2017	Y	1
49	10.1097/WNO.0000000000000503	Sadaka A, Schockman SL, Golnik KC., Evaluation of Horner Syndrome in the MRI Era. J Neuroophthalmol. 2017	N	0
50	10.1136/bjophthalmol-2016-310105	Jirawison C, Liu Y, Surasit K, Maningding E, Kamphaengkham S, Ausayakhun S, Heiden D, Margolis TP, Gonzales JA, Acharya NR, Keenan JD., Fundus findings in a series of patients with extrapulmonary tuberculosis in Thailand. Br J Ophthalmol. 2017	Y	1
51	10.1016/j.neuroimage.2016.12.053	Pelland M, Orban P, Dansereau C, Lepore F, Bellec P, Collignon O., State-dependent modulation of functional connectivity in early blind individuals. Neuroimage. 2017	Y	1
52	10.1097/ICO.0000000000001130	Zhang X, Bitar M, Davis RM., Spontaneous Canalicular Plug Erosion After Punctal Plug Placement. Cornea. 2017	Y	1
53	10.3928/23258160-20171030-04	Stephens JD, Adam MK, Todorich B, Faia LJ, Garg S, Dunn JP, Mehta S., Optical Coherence Tomography Findings in Endogenous Fungal Chorioretinitis, Retinitis, and Endophthalmitis. Ophthalmic Surg Lasers Imaging Retina. 2017	N	0
54	10.1097/ICL.0000000000000297	Hashemi H, Rastad H, Emamian MH, Fotouhi A., Floppy Eyelid Syndrome and Its Determinants in Iranian Adults: A Population-Based Study. Eye Contact Lens. 2017	Y	1
55	10.1177/2165079916686592	Lurati AR., Identifying Personal Risk Factors for Falls in the Workplace. Workplace Health Saf. 2017	Y	1
56	10.1016/j.ad.2016.07.006	Miura T, Ohtsuka M, Yamamoto T., Sweet's syndrome-like eruption in association with the exacerbation of Behçet's disease after the Great East Japan Earthquake. Actas Dermosifiliogr. 2017	N	0
57	10.1001/jamaophthalmol.2017.1009	Borkar DS, Homayounfar G, Tham VM, Ray KJ, Vinoya AC, Uchida A, Acharya NR., Association Between Thyroid Disease and Uveitis: Results From the Pacific Ocular Inflammation Study. JAMA Ophthalmol. 2017	Y	1
58	10.1111/opo.12332	Li SM, Kang MT, Wu SS, Meng B, Sun YY, Wei SF, Liu L, Peng X, Chen Z, Zhang F, Wang N., Studies using concentric ring bifocal and peripheral add multifocal contact lenses to slow myopia progression in school-aged children: a meta-analysis. Ophthalmic Physiol Opt. 2017	Y	1
59	10.1097/IAE.0000000000001666	Hwang CK, Kolomeyer AM, Brucker AJ, Morgan JIW, Nichols CW, Aleman TS., Localized Bilateral Juxtafoveal Photoreceptor Loss in POEMS: A New Association. Retina. 2017	Y	1
60	10.1159/000473701	Daien V, Le Pape A, Heve D, Villain M, Bremond Gignac D; Collaborators of the Epidemiology and Safety Program (EPISAFE).., Incidence and Characteristics of Congenital Cataract Surgery in France from 2010 to 2012: The EPISAFE Program. Ophthalmic Res. 2017	N	0
61	10.2337/db16-1364	Simó R, Hernández C., GLP-1R as a Target for the Treatment of Diabetic Retinopathy: Friend or Foe? Diabetes. 2017	Y	1
62	10.1016/j.ajo.2016.11.009	Ares WJ, Tonetti D, Yu JY, Monaco EA, Flickinger JC, Lunsford LD., Gamma Knife Radiosurgery for Uveal Metastases: Report of Three Cases and a Review of the Literature. Am J Ophthalmol. 2017	Y	1
63	10.1007/s40618-017-0608-z	Bartalena L, Veronesi G, Krassas GE, Wiersinga WM, Marcocci C, Marinò M, Salvi M, Daumerie C, Bournaud C, Stahl M, Sassi L, Azzolini C, Boboridis KG, Mourits MP, Soeters MR, Baldeschi L, Nardi M, Currò N, Boschi A, Bernard M, von Arx G, Perros P, et al., Does early response to intravenous glucocorticoids predict the final outcome in patients with moderate-to-severe and active Graves' orbitopathy?…	Y	1
64	10.1016/j.jneuroim.2017.08.003	Palterer B, Brugnolo F, Sieni E, Barilaro A, Parronchi P., Neuromyelitis optica, atypical hemophagocytic lymphohistiocytosis and heterozygous perforin A91V mutation. J Neuroimmunol. 2017	Y	1
65	10.1111/ped.13149	Demircioğlu Kılıc B, Akbalık Kara M, Ozcelik AA, Ustunsoy H, Balat A., Brachial artery pseudoaneurysm: Rare finding in childhood Behcet's disease. Pediatr Int. 2017	Y	1
66	10.3233/JAD-161190	Shellington EM, Heath M, Gill DP, Petrella RJ., Long-Term Maintenance of Executive-Related Oculomotor Improvements in Older Adults with Self-Reported Cognitive Complaints Following a 24-Week Multiple Modality Exercise Program. J Alzheimers Dis. 2017	N	0
67	10.1055/s-0043-100116	Li J, Cai Y, Sun X, Yao D, Xia J., MiR-346 and TRAb as Predicative Factors for Relapse in Graves' Disease Within One Year. Horm Metab Res. 2017	N	0
68	10.1097/ICO.0000000000001100	Farooq AV., Herpes Simplex Virus Keratitis and Resistance to Acyclovir. Cornea. 2017	Y	1
69	10.1080/02713683.2017.1341534	Modrzejewska M, Wiącek MP., A Novel Approach to the Differentiation of Intrabulbar Tumors in Color Doppler Imaging. Curr Eye Res. 2017	Y	1
70	10.1080/02713683.2017.1358373	Yamada Y, Suzuma K, Onizuka N, Uematsu M, Mohamed YH, Kitaoka T., Evaluation of retinal blood flow before and after panretinal photocoagulation using pattern scan laser for diabetic retinopathy. Curr Eye Res. 2017	Y	1
71	10.1097/IOP.0000000000000723	Chisholm SAM, Couch SM, Custer PL., Etiology and Management of Allergic Eyelid Dermatitis. Ophthal Plast Reconstr Surg. 2017	N	0
72	10.1016/j.expneurol.2016.08.004	Eapen BC, Murphy DP, Cifu DX., Neuroprosthetics in amputee and brain injury rehabilitation. Exp Neurol. 2017	Y	1
73	10.1136/bjophthalmol-2016-309460	Bhardwaj M, Sen S, Chosdol K, Sharma A, Pushker N, Kashyap S, Bakhshi S, Bajaj MS., miRNA-200c and miRNA-141 as potential prognostic biomarkers and regulators of epithelial-mesenchymal transition in eyelid sebaceous gland carcinoma. Br J Ophthalmol. 2017	N	0
74	10.1136/jnnp-2017-315782	Evoli A, Alboini PE, Iorio R, Damato V, Bartoccioni E., Pattern of ocular involvement in myasthenia gravis with MuSK antibodies. J Neurol Neurosurg Psychiatry. 2017	Y	1
75	10.3928/01913913-20170309-01	Rajavi Z, Feizi M, Behradfar N, Yaseri M, Sayanjali S, Motevaseli T, Sabbaghi H, Faghihi M., Inferior Oblique Overaction: Anterior Transposition Versus Myectomy. J Pediatr Ophthalmol Strabismus. 2017	Y	1
76	10.1080/02713683.2016.1223317	Jia Y, Hu DN, Sun J, Zhou J., Correlations Between MMPs and TIMPs Levels in Aqueous Humor from High Myopia and Cataract Patients. Curr Eye Res. 2017	Y	1
77	10.1097/IOP.0000000000000536	Cole SC, Eftekhari K, Oberg T, Mamalis N, Anderson RL., Osteolytic Sarcoidosis of the Orbital Roof Masquerading as a Malignant Orbital Lesion. Ophthal Plast Reconstr Surg. 2017	N	0
78	10.1111/desc.12379	Hadad BS, Maurer D, Lewis TL., The role of early visual input in the development of contour interpolation: the case of subjective contours. Dev Sci. 2017	Y	1
79	10.3109/13816810.2016.1164192	Topçu V, Alp MY, Alp CK, Bakır A, Geylan D, Yılmazoğlu MÖ., A new familial case of Jalili syndrome caused by a novel mutation in CNNM4. Ophthalmic Genet. 2017	Y	1
80	10.1016/j.ophtha.2017.07.010	Pflugfelder SC, de Paiva CS., The Pathophysiology of Dry Eye Disease: What We Know and Future Directions for Research. Ophthalmology. 2017	Y	1
81	10.14670/HH-11-820	Kimura A, Namekata K, Guo X, Harada C, Harada T., Dock3-NMDA receptor interaction as a target for glaucoma therapy. Histol Histopathol. 2017	N	0
82	10.1016/j.oftal.2016.03.021	Cañizares B, Yago I, Piñero Á, Ruiz M., Unilateral persistent fetal vasculature coexisting with anterior segment dysgenesia. Arch Soc Esp Oftalmol. 2017	N	0
83	10.1136/jmedgenet-2016-104212	Gerber S, Ding MG, Gérard X, Zwicker K, Zanlonghi X, Rio M, Serre V, Hanein S, Munnich A, Rotig A, Bianchi L, Amati-Bonneau P, Elpeleg O, Kaplan J, Brandt U, Rozet JM., Compound heterozygosity for severe and hypomorphic NDUFS2 mutations cause non-syndromic LHON-like optic neuropathy. J Med Genet. 2017	Y	1
84	10.1093/hmg/ddx168	Whitman MC, Engle EC., Ocular congenital cranial dysinnervation disorders (CCDDs): insights into axon growth and guidance. Hum Mol Genet. 2017	Y	1
85	10.1016/j.ophtha.2017.01.027	Wu Z, Saunders LJ, Daga FB, Diniz-Filho A, Medeiros FA., Frequency of Testing to Detect Visual Field Progression Derived Using a Longitudinal Cohort of Glaucoma Patients. Ophthalmology. 2017	Y	1
86	10.1038/eye.2017.34	Midena E, Pilotto E., Microperimetry in age: related macular degeneration. Eye (Lond). 2017	Y	1
87	10.1097/IOP.0000000000000806	Hirabayashi KE, Kalin-Hajdu E, Brodie FL, Kersten RC, Russell MS, Vagefi MR., Retrobulbar Injection of Amphotericin B for Orbital Mucormycosis. Ophthal Plast Reconstr Surg. 2017	N	0
88	10.1097/ICU.0000000000000456	Sozeri Y, Salim S., Anticlotting agents and the surgical management of glaucoma. Curr Opin Ophthalmol. 2018	Y	1
89	10.1097/IAE.0000000000001368	Yong Huang X, Wu N, Li N, Wang Y, Shakoor A., Diagnostic and Therapeutic Challenges. Retina. 2017	Y	1
90	10.1007/s12031-016-0869-6	D'Amico AG, Maugeri G, Bucolo C, Saccone S, Federico C, Cavallaro S, D'Agata V., Nap Interferes with Hypoxia-Inducible Factors and VEGF Expression in Retina of Diabetic Rats. J Mol Neurosci. 2017	Y	1
91	10.1097/ICO.0000000000001129	Nakagawa H, Hattori T, Koike N, Ehara T, Narimatsu A, Kumakura S, Matsumoto T, Goto H., Number of Bacteria and Time of Coincubation With Bacteria Required for the Development of Acanthamoeba Keratitis. Cornea. 2017	Y	1
92	10.1097/IAE.0000000000001408	Pertl L, Haas A, Hausberger S, Pichler T, Rabensteiner DF, Seidel G, Malle EM, Weger M., CHANGE OF CHOROIDAL VOLUME IN UNTREATED CENTRAL SEROUS CHORIORETINOPATHY. Retina. 2017	Y	1
93	10.1002/dmrr.2860	Omori Y, Yanagisawa K, Sato A, Uchigata Y., The importance of nonstop treatment after delivery for pregnant women with type 2 diabetes. Diabetes Metab Res Rev. 2017	Y	1
94	10.1016/j.anai.2017.01.027	Bork K, Brehler R, Witzke G, Boor S, Heineke W, Hardt J., Blindness, tetraspasticity, and other signs of irreversible brain damage in hereditary angioedema. Ann Allergy Asthma Immunol. 2017	Y	1
95	10.1007/s10067-016-3417-4	Vitale A, Emmi G, Lopalco G, Gentileschi S, Silvestri E, Fabiani C, Urban ML, Frediani B, Galeazzi M, Iannone F, Rigante D, Cantarini L., Adalimumab effectiveness in Behçet's disease: short and long-term data from a multicenter retrospective observational study. Clin Rheumatol. 2017	Y	1
96	10.1038/nprot.2017.032	Lückoff A, Scholz R, Sennlaub F, Xu H, Langmann T., Comprehensive analysis of mouse retinal mononuclear phagocytes. Nat Protoc. 2017	N	0
97	10.1097/ICO.0000000000001038	Micali A, Roszkowska AM, Postorino EI, Rania L, Aragona E, Wylegala E, Nowinska A, Ieni A, Calimeri S, Pisani A, Aragona P, Puzzolo D., Comparative Confocal and Histopathological Study of Corneal Changes in Multiple Myeloma. Cornea. 2017	Y	1
98	10.1097/ICU.0000000000000385	Daya SM., Conjunctival-limbal autograft. Curr Opin Ophthalmol. 2017	Y	1
99	10.1007/s10384-016-0490-9	Shalaby U., Diltiazem co treatment with cyclosporine for induction of disease remission in sight-threatening non-infectious intraocular inflammation. Jpn J Ophthalmol. 2017	Y	1
100	10.1016/j.ajo.2016.12.023	Tavares Ferreira J, Proença R, Alves M, Dias-Santos A, Santos BO, Cunha JP, Papoila AL, Abegão Pinto L., Retina and Choroid of Diabetic Patients Without Observed Retinal Vascular Changes: A Longitudinal Study. Am J Ophthalmol. 2017	Y	1
101	10.1016/j.jcjo.2016.07.026	Eom Y, Song JS, Kim HM., Spectacle plane add power of multifocal intraocular lenses according to effective lens position. Can J Ophthalmol. 2017	Y	1
102	10.1097/IAE.0000000000001401	Tye A, Klufas MA, McCannel CA, McCannel TA., Intracameral Air in Phacovitrectomy for Maintaining Intraocular Lens Position. Retina. 2017	Y	1
103	10.1111/aos.13385	Jacobsen AG, Brost B, Vorum H, Hargitai J., Functional benefits and patient satisfaction with upper blepharoplasty - evaluated by objective and subjective outcome measures. Acta Ophthalmol. 2017	Y	1
104	10.1136/bjophthalmol-2016-309504	Himori N, Kunikata H, Kawasaki R, Shiga Y, Omodaka K, Takahashi H, Miyata T, Nakazawa T., The association between skin autofluorescence and mean deviation in patients with open-angle glaucoma. Br J Ophthalmol. 2017	Y	1
105	10.1007/s00417-017-3696-8	Callizo J, Pfeiffer S, Lahme E, van Oterendorp C, Khattab M, Bemme S, Kulanga M, Hoerauf H, Feltgen N., Risk of progression in macula-on rhegmatogenous retinal detachment. Graefes Arch Clin Exp Ophthalmol. 2017	Y	1
106	10.1111/cup.12909	Motaparthi K., Pseudoherpetic transient acantholytic dermatosis (Grover disease): case series and review of the literature. J Cutan Pathol. 2017	Y	1
107	10.1097/IOP.0000000000000837	Charles NC, Jakobiec FA, Patel P., Periorbital Dermoid Cyst With Unique Trichilemmal Differentiation. Ophthal Plast Reconstr Surg. 2017	N	0
108	10.1080/09286586.2016.1255763	Sasongko MB, Agni AN, Wardhana FS, Kotha SP, Gupta P, Widayanti TW, Supanji, Widyaputri F, Widyaningrum R, Wong TY, Kawasaki R, Wang JJ, Pawiroranu S., Rationale and Methodology for a Community-Based Study of Diabetic Retinopathy in an Indonesian Population with Type 2 Diabetes Mellitus: The Jogjakarta Eye Diabetic Study in the Community. Ophthalmic Epidemiol. 2017	Y	1
109	10.1111/jnc.14070	Bordone MP, González Fleitas MF, Pasquini LA, Bosco A, Sande PH, Rosenstein RE, Dorfman D., Involvement of microglia in early axoglial alterations of the optic nerve induced by experimental glaucoma. J Neurochem. 2017	Y	1
110	10.1016/j.ajpath.2017.08.025	Kumar S, Nakashizuka H, Jones A, Lambert A, Zhao X, Shen M, Parker M, Wang S, Berriochoa Z, Fnu A, VanBeuge S, Chévez-Barrios P, Tso M, Rainier J, Fu Y., Proteolytic Degradation and Inflammation Play Critical Roles in Polypoidal Choroidal Vasculopathy. Am J Pathol. 2017	Y	1
111	10.1017/S0031182017000270	Chen SJ, Zhang YX, Huang SG, Lu FL., Galectins expressed differently in genetically susceptible C57BL/6 and resistant BALB/c mice during acute ocular Toxoplasma gondii infection. Parasitology. 2017	Y	1
112	10.1111/aos.13226	Wirth MA, Freiberg F, Pfau M, Wons J, Becker MD, Michels S., Optical coherence tomography angiography in age-related macular degeneration: persistence of vascular network in quiescent choroidal neovascularization. Acta Ophthalmol. 2017	Y	1
113	10.1136/bjophthalmol-2015-307837	Dhalla K, Cousens S, Murdoch IE., Phacoemulsification compared with phacotrabeculectomy surgery: a within-person observational cohort study. Br J Ophthalmol. 2017	Y	1
114	10.3171/2016.12.SPINE16540	Ibrahim TF, Sweis RT, Nockels RP., Reversible postoperative blindness caused by bilateral status epilepticus amauroticus following thoracolumbar deformity correction: case report. J Neurosurg Spine. 2017	Y	1
115	10.1097/ICO.0000000000001263	Oliva-Biénzobas V, Navas A, C Astiazarán M, Chacón-Camacho OF, A Bermúdez-Magner J, Takane M, Graue-Hernández E, Zenteno JC., CYP1B1 Cytopathy: Uncommon Phenotype of a Homozygous CYP1B1 Deletion as Internal Corneal Ulcer of Von Hippel. Cornea. 2017	Y	1
				87

## Sheet: Brazil
ID Number (please do not modify)	Digital Object Identifier (DOI)	Reference	Access to Full text (Y/N)	Column 0/1
1	10.1016/j.neulet.2016.12.057	Azuchi Y, Kimura A, Guo X, Akiyama G, Noro T, Harada C, Nishigaki A, Namekata K, Harada T., Valproic acid and ASK1 deficiency ameliorate optic neuritis and neurodegeneration in an animal model of multiple sclerosis. Neurosci Lett. 2017	Y	1
2	10.1111/cge.12895	Kletke S, Batmanabane V, Dai T, Vincent A, Li S, Gordon KA, Papsin BC, Cushing SL, Héon E., The combination of vestibular impairment and congenital sensorineural hearing loss predisposes patients to ocular anomalies, including Usher syndrome. Clin Genet. 2017	Y	1
3	10.1097/DSS.0000000000000787	Martínez-Palmer A, Calsina-Prat M, Ormaechea N, Toll A., Reconstruction of Combined Upper and Lower Eyelid Defects in a Patient With Lentigo Maligna. Dermatol Surg. 2017	N	0
4	10.1093/brain/awx236	Niturad CE, Lev D, Kalscheuer VM, Charzewska A, Schubert J, Lerman-Sagie T, Kroes HY, Oegema R, Traverso M, Specchio N, Lassota M, Chelly J, Bennett-Back O, Carmi N, Koffler-Brill T, Iacomino M, Trivisano M, Capovilla G, Striano P, Nawara M, Rzonca S, Fischer U, et al., Rare GABRA3 variants are associated with epileptic seizures, encephalopathy and dysmorphic features. Brain. 2017	N	0
5	10.1080/13816810.2016.1188124	Tyagi P, Juma Z, Reddy AR., Retinal features in Mulvihill-Smith syndrome. Ophthalmic Genet. 2017	N	0
6	10.1097/WNO.0000000000000455	Mendes Marques NBPS, Barros SR, Miranda AF, Nobre Cardoso J, Parreira S, Fonseca T, Donaire NM, Campos N., Horizontal Gaze Palsy and Progressive Scoliosis With ROBO 3 Mutations in Patients From Cape Verde. J Neuroophthalmol. 2017	Y	1
7	10.1080/09286586.2017.1313992	Oye J, Mactaggart I, Polack S, Schmidt E, Tamo V, Okwen M, Kuper H., Prevalence and Causes of Visual Impairment in Fundong District, North West Cameroon: Results of a Population-Based Survey. Ophthalmic Epidemiol. 2017	N	0
8	10.1016/j.clae.2017.01.003	Gifford K, Gifford P, Hendicott PL, Schmid KL., Near binocular visual function in young adult orthokeratology versus soft contact lens wearers. Cont Lens Anterior Eye. 2017	Y	1
9	10.2217/bmm-2017-0218	Wostyn P, De Deyn PP., Intracranial pressure-induced optic nerve sheath response as a predictive biomarker for optic disc edema in astronauts. Biomark Med. 2017	N	0
10	10.1097/WNO.0000000000000555	Morrow MJ, Ko MW., Should Oral Corticosteroids Be Used to Treat Demyelinating Optic Neuritis? J Neuroophthalmol. 2017	Y	1
11	10.1080/09273972.2017.1349816	Morad Y, Pras E, Nemet A., Superior and Lateral Rectus Myopexy for Acquired Adult Distance Esotropia: A "One Size Fits All" Surgery. Strabismus. 2017	N	0
12	10.1097/IOP.0000000000000731	Repp DJ, Rubinstein TJ, Herreid PA, Sires BS., Biomechanics of the Levator Aponeurosis. Ophthal Plast Reconstr Surg. 2017	Y	1
13	10.1007/s00417-017-3817-4	De Gregorio A, Pedrotti E, Stevan G, Montali M, Morselli S., Safety and efficacy of multiple cyclocoagulation of ciliary bodies by high-intensity focused ultrasound in patients with glaucoma. Graefes Arch Clin Exp Ophthalmol. 2017	Y	1
14	10.1111/aos.13445	Ten Berge JCEM, van Dijk EHC, Schreurs MWJ, Vermeer J, Boon CJF, Rothova A., Antiretinal antibodies in central serous chorioretinopathy: prevalence and clinical implications. Acta Ophthalmol. 2018	Y	1
15	10.1007/s10072-016-2785-5	Kang H, Kim SK, Park KJ, Choi NC, Kwon OY, Lim BH., Hemianopic line bisection error in a patient with Alzheimer's disease. Neurol Sci. 2017	Y	1
16	10.1212/WNL.0000000000004312	Hennes EM, Baumann M, Schanda K, Anlar B, Bajer-Kornek B, Blaschek A, Brantner-Inthaler S, Diepold K, Eisenkölbl A, Gotwald T, Kuchukhidze G, Gruber-Sedlmayr U, Häusler M, Höftberger R, Karenfort M, Klein A, Koch J, Kraus V, Lechner C, Leiz S, Leypoldt F, Mader S, et al., Prognostic relevance of MOG antibodies in children with an acquired demyelinating syndrome. Neurology. 2017	N	0
17	10.1016/j.oftal.2016.08.006	Pareja-Ríos A, Bonaque-González S, Serrano-García M, Cabrera-López F, Abreu-Reyes P, Marrero-Saavedra MD., Tele-ophthalmology for diabetic retinopathy screening: 8 years of experience. Arch Soc Esp Oftalmol. 2017	N	0
18	10.1007/s00417-016-3530-8	Mikhail M, El-Rayes EN, Kojima K, Ajlan R, Rezende F., Catheter-guided suprachoroidal buckling of rhegmatogenous retinal detachments secondary to peripheral retinal breaks. Graefes Arch Clin Exp Ophthalmol. 2017	Y	1
19	10.1007/s00417-017-3616-y	Shah MA, Agrawal R, Teoh R, Shah SM, Patel K, Gupta S, Gosai S., Pediatric ocular trauma score as a prognostic tool in the management of pediatric traumatic cataracts. Graefes Arch Clin Exp Ophthalmol. 2017	Y	1
20	10.1016/j.jfo.2016.09.014	Zaarour K, Slim E, Antoun J, Waked N., Thick keratoconic cornea associated with posterior polymorphous corneal dystrophy. J Fr Ophtalmol. 2017	N	0
21	10.1097/IAE.0000000000001311	Shifera AS, Pennesi ME, Yang P, Lin P., ULTRA-WIDE-FIELD FUNDUS AUTOFLUORESCENCE FINDINGS IN PATIENTS WITH ACUTE ZONAL OCCULT OUTER RETINOPATHY. Retina. 2017	N	0
22	10.1080/13816810.2017.1354384	Bryant L, Lozynska O, Han G, Morgan JIW, Gai X, Maguire AM, Aleman T, Bennett J., On variants and disease-causing mutations: Case studies of a SEMA4A variant identified in inherited blindness. Ophthalmic Genet. 2018	N	0
23	10.1097/IAE.0000000000001391	Cheung CMG, Yanagi Y, Mohla A, Lee SY, Mathur R, Chan CM, Yeo I, Wong TY., CHARACTERIZATION AND DIFFERENTIATION OF POLYPOIDAL CHOROIDAL VASCULOPATHY USING SWEPT SOURCE OPTICAL COHERENCE TOMOGRAPHY ANGIOGRAPHY. Retina. 2017	N	0
24	10.1016/j.jcjo.2016.08.003	Lassalle S, Maschi C, Caujolle JP, Giordanengo V, Hofman P., Inverted conjunctival papilloma: a certainly underestimated high-risk lesion for carcinomatous transformation-a case report. Can J Ophthalmol. 2017	Y	1
25	10.2217/epi-2017-0060	Piras IS, Mills G, Llaci L, Naymik M, Ramsey K, Belnap N, Balak CD, Jepsen WM, Szelinger S, Siniard AL, Lewis CR, LaFleur M, Richholt RF, De Both MD, Avela K, Rangasamy S, Craig DW, Narayanan V, Järvelä I, Huentelman MJ, Schrauwen I., Exploring genome-wide DNA methylation patterns in Aicardi syndrome. Epigenomics. 2017	N	0
26	10.1097/IJG.0000000000000551	Perez CI, Mellado F, Jones A, Colvin R., Trabeculectomy Combined With Collagen Matrix Implant (Ologen). J Glaucoma. 2017	Y	1
27	10.1016/j.jcjo.2016.07.015	De Oliveira PR, Berger AR, Chow DR., Optical coherence tomography angiography in chorioretinal disorders. Can J Ophthalmol. 2017	Y	1
28	10.1016/j.jneuroim.2017.07.006	Yoshikura N, Kimura A, Hayashi Y, Inuzuka T., Anti-C1q autoantibodies in patients with neuromyelitis optica spectrum disorders. J Neuroimmunol. 2017	Y	1
29	10.1097/SCS.0000000000003431	Na J, Choi SY, Baek S, Lee H., Hemorrhage and Infarction of the Conjunctiva and Orbit in Essential Thrombocythemia. J Craniofac Surg. 2017	Y	1
30	10.1097/ICB.0000000000000374	Despréaux R, Mrejen S, Quentel G, Cohen SY., EN FACE OPTICAL COHERENCE TOMOGRAPHY (OCT) AND OCT ANGIOGRAPHY FINDINGS IN RETINAL ASTROCYTIC HAMARTOMAS. Retin Cases Brief Rep. 2017	N	0
31	10.1136/bjophthalmol-2016-309996	Dagi LR, MacKinnon S, Zurakowski D, Prabhu SP., Rectus muscle excyclorotation and V-pattern strabismus: a quantitative appraisal of clinical relevance in syndromic craniosynostosis. Br J Ophthalmol. 2017	N	0
32	10.1097/IAE.0000000000001351	Medina CA, Ortiz AG, Relhan N, Smiddy WE, Townsend JH, Flynn HW Jr., MACULAR HOLE AFTER PARS PLANA VITRECTOMY FOR RHEGMATOGENOUS RETINAL DETACHMENT. Retina. 2017	N	0
33	10.1080/09286586.2016.1257027	Malkin AG, Goldstein JE, Massof RW., Multivariable Regression Model of the EuroQol 5-Dimension Questionnaire in Patients Seeking Outpatient Low Vision Rehabilitation. Ophthalmic Epidemiol. 2017	N	0
34	10.1007/s00018-017-2643-5	Kudo A., Introductory review: periostin-gene and protein structure. Cell Mol Life Sci. 2017	Y	1
35	10.1080/02713683.2017.1344712	Wang T, Zhu L, Peng Y, Shen N, Yu Y, Yao M, Zhu J., Photochemical Cross-Linking for Penetrating Corneal Wound Closure in Enucleated Porcine Eyes. Curr Eye Res. 2017	N	0
36	10.1093/brain/awx219	Gerber S, Charif M, Chevrollier A, Chaumette T, Angebault C, Kane MS, Paris A, Alban J, Quiles M, Delettre C, Bonneau D, Procaccio V, Amati-Bonneau P, Reynier P, Leruez S, Calmon R, Boddaert N, Funalot B, Rio M, Bouccara D, Meunier I, Sesaki H, et al., Mutations in DNM1L, as in OPA1, result indominant optic atrophy despite opposite effectson mitochondrial fusion and fission. Brain. 2017	N	0
37	10.1097/IAE.0000000000001683	Cheng YC, Shen JH, Chao AN, Chen KJ., Later Development of Posterior Staphyloma in Choroidal Osteoma With Choroidal Neovascularization. Retina. 2017	Y	1
38	10.2174/1567202614666161104115440	Shimazawa M, Inoue Y, Masuda T, Onodera R, Tahara K, Shimizu Y, Mibe Y, Tsuruma K, Takeuchi H, Hara H., Topical Diclofenac-Loaded Liposomes Ameliorate Laser-Induced Choroidal Neovascularization in Mice and Non-Human Primates. Curr Neurovasc Res. 2017	N	0
39	10.1007/s00405-016-4308-7	Ozsutcu M, Balci O, Tanriverdi C, Demirci G., Efficacy of adjunctive mitomycin C in transcanalicular diode laser dacryocystorhinostomy. Eur Arch Otorhinolaryngol. 2017	Y	1
40	10.1136/bjophthalmol-2016-309775	Aixinjueluo W, Usui T, Miyai T, Toyono T, Sakisaka T, Yamagami S., Accelerated transepithelial corneal cross-linking for progressive keratoconus: a prospective study of 12 months. Br J Ophthalmol. 2017	N	0
41	10.1016/j.ijporl.2016.11.027	Yin T, van der Meer G., Neonatal airway obstruction in bilateral congenital dacryocystocoele: Case report and review of the literature. Int J Pediatr Otorhinolaryngol. 2017	Y	1
42	10.1007/s00417-017-3860-1	Chan JCW, Choy BNK, Chan OCC, Li KKW., Early intraocular pressure change after peripheral iridotomy with ultralow fluence pattern scanning laser and Nd:YAG laser in primary angle-closure suspect: Kowloon East Pattern Scanning Laser Study Report No. 3. Graefes Arch Clin Exp Ophthalmol. 2018	Y	1
43	10.1136/bjophthalmol-2016-309245	Sharma S, Ang M, Najjar RP, Sng C, Cheung CY, Rukmini AV, Schmetterer L, Milea D., Optical coherence tomography angiography in acute non-arteritic anterior ischaemic optic neuropathy. Br J Ophthalmol. 2017	N	0
44	10.1080/01676830.2017.1279664	Medel R, Balaguer Solé Ò, Vasquez LM., Inferior tarsal muscle-conjunctivectomy for reverse ptosis repair: A novel technique. Orbit. 2017	N	0
45	10.1038/eye.2017.25	Betts T, Ahmed S, Maguire S, Watts P., Characteristics of non-vitreoretinal ocular injury in child maltreatment: a systematic review. Eye (Lond). 2017	N	0
46	10.1007/s10792-016-0261-0	Altunel O, Duru N, Goktas A, Ozkose A, Goktas E, Atas M., Evaluation of foveal photoreceptor layer in eyes with macular edema associated with branch retinal vein occlusion after ozurdex treatment. Int Ophthalmol. 2017	Y	1
47	10.1159/000478705	Motohashi R, Noma H, Yasuda K, Kotake O, Goto H, Shimura M., Dynamics of Inflammatory Factors in Aqueous Humor during Ranibizumab or Aflibercept Treatment for Age-Related Macular Degeneration. Ophthalmic Res. 2017	Y	1
48	10.1016/j.jns.2017.01.033	Kang S, Shaikh AG., Acquired pendular nystagmus. J Neurol Sci. 2017	Y	1
49	10.1097/WNO.0000000000000503	Sadaka A, Schockman SL, Golnik KC., Evaluation of Horner Syndrome in the MRI Era. J Neuroophthalmol. 2017	Y	1
50	10.1136/bjophthalmol-2016-310105	Jirawison C, Liu Y, Surasit K, Maningding E, Kamphaengkham S, Ausayakhun S, Heiden D, Margolis TP, Gonzales JA, Acharya NR, Keenan JD., Fundus findings in a series of patients with extrapulmonary tuberculosis in Thailand. Br J Ophthalmol. 2017	N	0
51	10.1016/j.neuroimage.2016.12.053	Pelland M, Orban P, Dansereau C, Lepore F, Bellec P, Collignon O., State-dependent modulation of functional connectivity in early blind individuals. Neuroimage. 2017	Y	1
52	10.1097/ICO.0000000000001130	Zhang X, Bitar M, Davis RM., Spontaneous Canalicular Plug Erosion After Punctal Plug Placement. Cornea. 2017	Y	1
53	10.3928/23258160-20171030-04	Stephens JD, Adam MK, Todorich B, Faia LJ, Garg S, Dunn JP, Mehta S., Optical Coherence Tomography Findings in Endogenous Fungal Chorioretinitis, Retinitis, and Endophthalmitis. Ophthalmic Surg Lasers Imaging Retina. 2017	N	0
54	10.1097/ICL.0000000000000297	Hashemi H, Rastad H, Emamian MH, Fotouhi A., Floppy Eyelid Syndrome and Its Determinants in Iranian Adults: A Population-Based Study. Eye Contact Lens. 2017	N	0
55	10.1177/2165079916686592	Lurati AR., Identifying Personal Risk Factors for Falls in the Workplace. Workplace Health Saf. 2017	Y	1
56	10.1016/j.ad.2016.07.006	Miura T, Ohtsuka M, Yamamoto T., Sweet's syndrome-like eruption in association with the exacerbation of Behçet's disease after the Great East Japan Earthquake. Actas Dermosifiliogr. 2017	N	0
57	10.1001/jamaophthalmol.2017.1009	Borkar DS, Homayounfar G, Tham VM, Ray KJ, Vinoya AC, Uchida A, Acharya NR., Association Between Thyroid Disease and Uveitis: Results From the Pacific Ocular Inflammation Study. JAMA Ophthalmol. 2017	N	0
58	10.1111/opo.12332	Li SM, Kang MT, Wu SS, Meng B, Sun YY, Wei SF, Liu L, Peng X, Chen Z, Zhang F, Wang N., Studies using concentric ring bifocal and peripheral add multifocal contact lenses to slow myopia progression in school-aged children: a meta-analysis. Ophthalmic Physiol Opt. 2017	Y	1
59	10.1097/IAE.0000000000001666	Hwang CK, Kolomeyer AM, Brucker AJ, Morgan JIW, Nichols CW, Aleman TS., Localized Bilateral Juxtafoveal Photoreceptor Loss in POEMS: A New Association. Retina. 2017	Y	1
60	10.1159/000473701	Daien V, Le Pape A, Heve D, Villain M, Bremond Gignac D; Collaborators of the Epidemiology and Safety Program (EPISAFE).., Incidence and Characteristics of Congenital Cataract Surgery in France from 2010 to 2012: The EPISAFE Program. Ophthalmic Res. 2017	Y	1
61	10.2337/db16-1364	Simó R, Hernández C., GLP-1R as a Target for the Treatment of Diabetic Retinopathy: Friend or Foe? Diabetes. 2017	Y	1
62	10.1016/j.ajo.2016.11.009	Ares WJ, Tonetti D, Yu JY, Monaco EA, Flickinger JC, Lunsford LD., Gamma Knife Radiosurgery for Uveal Metastases: Report of Three Cases and a Review of the Literature. Am J Ophthalmol. 2017	Y	1
63	10.1007/s40618-017-0608-z	Bartalena L, Veronesi G, Krassas GE, Wiersinga WM, Marcocci C, Marinò M, Salvi M, Daumerie C, Bournaud C, Stahl M, Sassi L, Azzolini C, Boboridis KG, Mourits MP, Soeters MR, Baldeschi L, Nardi M, Currò N, Boschi A, Bernard M, von Arx G, Perros P, et al., Does early response to intravenous glucocorticoids predict the final outcome in patients with moderate-to-severe and active Graves' orbitopathy?…	Y	1
64	10.1016/j.jneuroim.2017.08.003	Palterer B, Brugnolo F, Sieni E, Barilaro A, Parronchi P., Neuromyelitis optica, atypical hemophagocytic lymphohistiocytosis and heterozygous perforin A91V mutation. J Neuroimmunol. 2017	Y	1
65	10.1111/ped.13149	Demircioğlu Kılıc B, Akbalık Kara M, Ozcelik AA, Ustunsoy H, Balat A., Brachial artery pseudoaneurysm: Rare finding in childhood Behcet's disease. Pediatr Int. 2017	Y	1
66	10.3233/JAD-161190	Shellington EM, Heath M, Gill DP, Petrella RJ., Long-Term Maintenance of Executive-Related Oculomotor Improvements in Older Adults with Self-Reported Cognitive Complaints Following a 24-Week Multiple Modality Exercise Program. J Alzheimers Dis. 2017	N	0
67	10.1055/s-0043-100116	Li J, Cai Y, Sun X, Yao D, Xia J., MiR-346 and TRAb as Predicative Factors for Relapse in Graves' Disease Within One Year. Horm Metab Res. 2017	N	0
68	10.1097/ICO.0000000000001100	Farooq AV., Herpes Simplex Virus Keratitis and Resistance to Acyclovir. Cornea. 2017	Y	1
69	10.1080/02713683.2017.1341534	Modrzejewska M, Wiącek MP., A Novel Approach to the Differentiation of Intrabulbar Tumors in Color Doppler Imaging. Curr Eye Res. 2017	N	0
70	10.1080/02713683.2017.1358373	Yamada Y, Suzuma K, Onizuka N, Uematsu M, Mohamed YH, Kitaoka T., Evaluation of retinal blood flow before and after panretinal photocoagulation using pattern scan laser for diabetic retinopathy. Curr Eye Res. 2017	N	0
71	10.1097/IOP.0000000000000723	Chisholm SAM, Couch SM, Custer PL., Etiology and Management of Allergic Eyelid Dermatitis. Ophthal Plast Reconstr Surg. 2017	Y	1
72	10.1016/j.expneurol.2016.08.004	Eapen BC, Murphy DP, Cifu DX., Neuroprosthetics in amputee and brain injury rehabilitation. Exp Neurol. 2017	Y	1
73	10.1136/bjophthalmol-2016-309460	Bhardwaj M, Sen S, Chosdol K, Sharma A, Pushker N, Kashyap S, Bakhshi S, Bajaj MS., miRNA-200c and miRNA-141 as potential prognostic biomarkers and regulators of epithelial-mesenchymal transition in eyelid sebaceous gland carcinoma. Br J Ophthalmol. 2017	N	0
74	10.1136/jnnp-2017-315782	Evoli A, Alboini PE, Iorio R, Damato V, Bartoccioni E., Pattern of ocular involvement in myasthenia gravis with MuSK antibodies. J Neurol Neurosurg Psychiatry. 2017	Y	1
75	10.3928/01913913-20170309-01	Rajavi Z, Feizi M, Behradfar N, Yaseri M, Sayanjali S, Motevaseli T, Sabbaghi H, Faghihi M., Inferior Oblique Overaction: Anterior Transposition Versus Myectomy. J Pediatr Ophthalmol Strabismus. 2017	N	0
76	10.1080/02713683.2016.1223317	Jia Y, Hu DN, Sun J, Zhou J., Correlations Between MMPs and TIMPs Levels in Aqueous Humor from High Myopia and Cataract Patients. Curr Eye Res. 2017	N	0
77	10.1097/IOP.0000000000000536	Cole SC, Eftekhari K, Oberg T, Mamalis N, Anderson RL., Osteolytic Sarcoidosis of the Orbital Roof Masquerading as a Malignant Orbital Lesion. Ophthal Plast Reconstr Surg. 2017	Y	1
78	10.1111/desc.12379	Hadad BS, Maurer D, Lewis TL., The role of early visual input in the development of contour interpolation: the case of subjective contours. Dev Sci. 2017	Y	1
79	10.3109/13816810.2016.1164192	Topçu V, Alp MY, Alp CK, Bakır A, Geylan D, Yılmazoğlu MÖ., A new familial case of Jalili syndrome caused by a novel mutation in CNNM4. Ophthalmic Genet. 2017	N	0
80	10.1016/j.ophtha.2017.07.010	Pflugfelder SC, de Paiva CS., The Pathophysiology of Dry Eye Disease: What We Know and Future Directions for Research. Ophthalmology. 2017	Y	1
81	10.14670/HH-11-820	Kimura A, Namekata K, Guo X, Harada C, Harada T., Dock3-NMDA receptor interaction as a target for glaucoma therapy. Histol Histopathol. 2017	N	0
82	10.1016/j.oftal.2016.03.021	Cañizares B, Yago I, Piñero Á, Ruiz M., Unilateral persistent fetal vasculature coexisting with anterior segment dysgenesia. Arch Soc Esp Oftalmol. 2017	N	0
83	10.1136/jmedgenet-2016-104212	Gerber S, Ding MG, Gérard X, Zwicker K, Zanlonghi X, Rio M, Serre V, Hanein S, Munnich A, Rotig A, Bianchi L, Amati-Bonneau P, Elpeleg O, Kaplan J, Brandt U, Rozet JM., Compound heterozygosity for severe and hypomorphic NDUFS2 mutations cause non-syndromic LHON-like optic neuropathy. J Med Genet. 2017	N	0
84	10.1093/hmg/ddx168	Whitman MC, Engle EC., Ocular congenital cranial dysinnervation disorders (CCDDs): insights into axon growth and guidance. Hum Mol Genet. 2017	N	0
85	10.1016/j.ophtha.2017.01.027	Wu Z, Saunders LJ, Daga FB, Diniz-Filho A, Medeiros FA., Frequency of Testing to Detect Visual Field Progression Derived Using a Longitudinal Cohort of Glaucoma Patients. Ophthalmology. 2017	Y	1
86	10.1038/eye.2017.34	Midena E, Pilotto E., Microperimetry in age: related macular degeneration. Eye (Lond). 2017	N	0
87	10.1097/IOP.0000000000000806	Hirabayashi KE, Kalin-Hajdu E, Brodie FL, Kersten RC, Russell MS, Vagefi MR., Retrobulbar Injection of Amphotericin B for Orbital Mucormycosis. Ophthal Plast Reconstr Surg. 2017	Y	1
88	10.1097/ICU.0000000000000456	Sozeri Y, Salim S., Anticlotting agents and the surgical management of glaucoma. Curr Opin Ophthalmol. 2018	Y	1
89	10.1097/IAE.0000000000001368	Yong Huang X, Wu N, Li N, Wang Y, Shakoor A., Diagnostic and Therapeutic Challenges. Retina. 2017	Y	1
90	10.1007/s12031-016-0869-6	D'Amico AG, Maugeri G, Bucolo C, Saccone S, Federico C, Cavallaro S, D'Agata V., Nap Interferes with Hypoxia-Inducible Factors and VEGF Expression in Retina of Diabetic Rats. J Mol Neurosci. 2017	Y	1
91	10.1097/ICO.0000000000001129	Nakagawa H, Hattori T, Koike N, Ehara T, Narimatsu A, Kumakura S, Matsumoto T, Goto H., Number of Bacteria and Time of Coincubation With Bacteria Required for the Development of Acanthamoeba Keratitis. Cornea. 2017	Y	1
92	10.1097/IAE.0000000000001408	Pertl L, Haas A, Hausberger S, Pichler T, Rabensteiner DF, Seidel G, Malle EM, Weger M., CHANGE OF CHOROIDAL VOLUME IN UNTREATED CENTRAL SEROUS CHORIORETINOPATHY. Retina. 2017	Y	1
93	10.1002/dmrr.2860	Omori Y, Yanagisawa K, Sato A, Uchigata Y., The importance of nonstop treatment after delivery for pregnant women with type 2 diabetes. Diabetes Metab Res Rev. 2017	Y	1
94	10.1016/j.anai.2017.01.027	Bork K, Brehler R, Witzke G, Boor S, Heineke W, Hardt J., Blindness, tetraspasticity, and other signs of irreversible brain damage in hereditary angioedema. Ann Allergy Asthma Immunol. 2017	Y	1
95	10.1007/s10067-016-3417-4	Vitale A, Emmi G, Lopalco G, Gentileschi S, Silvestri E, Fabiani C, Urban ML, Frediani B, Galeazzi M, Iannone F, Rigante D, Cantarini L., Adalimumab effectiveness in Behçet's disease: short and long-term data from a multicenter retrospective observational study. Clin Rheumatol. 2017	Y	1
96	10.1038/nprot.2017.032	Lückoff A, Scholz R, Sennlaub F, Xu H, Langmann T., Comprehensive analysis of mouse retinal mononuclear phagocytes. Nat Protoc. 2017	Y	1
97	10.1097/ICO.0000000000001038	Micali A, Roszkowska AM, Postorino EI, Rania L, Aragona E, Wylegala E, Nowinska A, Ieni A, Calimeri S, Pisani A, Aragona P, Puzzolo D., Comparative Confocal and Histopathological Study of Corneal Changes in Multiple Myeloma. Cornea. 2017	Y	1
98	10.1097/ICU.0000000000000385	Daya SM., Conjunctival-limbal autograft. Curr Opin Ophthalmol. 2017	Y	1
99	10.1007/s10384-016-0490-9	Shalaby U., Diltiazem co treatment with cyclosporine for induction of disease remission in sight-threatening non-infectious intraocular inflammation. Jpn J Ophthalmol. 2017	Y	1
100	10.1016/j.ajo.2016.12.023	Tavares Ferreira J, Proença R, Alves M, Dias-Santos A, Santos BO, Cunha JP, Papoila AL, Abegão Pinto L., Retina and Choroid of Diabetic Patients Without Observed Retinal Vascular Changes: A Longitudinal Study. Am J Ophthalmol. 2017	Y	1
101	10.1016/j.jcjo.2016.07.026	Eom Y, Song JS, Kim HM., Spectacle plane add power of multifocal intraocular lenses according to effective lens position. Can J Ophthalmol. 2017	Y	1
102	10.1097/IAE.0000000000001401	Tye A, Klufas MA, McCannel CA, McCannel TA., Intracameral Air in Phacovitrectomy for Maintaining Intraocular Lens Position. Retina. 2017	Y	1
103	10.1111/aos.13385	Jacobsen AG, Brost B, Vorum H, Hargitai J., Functional benefits and patient satisfaction with upper blepharoplasty - evaluated by objective and subjective outcome measures. Acta Ophthalmol. 2017	Y	1
104	10.1136/bjophthalmol-2016-309504	Himori N, Kunikata H, Kawasaki R, Shiga Y, Omodaka K, Takahashi H, Miyata T, Nakazawa T., The association between skin autofluorescence and mean deviation in patients with open-angle glaucoma. Br J Ophthalmol. 2017	N	0
105	10.1007/s00417-017-3696-8	Callizo J, Pfeiffer S, Lahme E, van Oterendorp C, Khattab M, Bemme S, Kulanga M, Hoerauf H, Feltgen N., Risk of progression in macula-on rhegmatogenous retinal detachment. Graefes Arch Clin Exp Ophthalmol. 2017	Y	1
106	10.1111/cup.12909	Motaparthi K., Pseudoherpetic transient acantholytic dermatosis (Grover disease): case series and review of the literature. J Cutan Pathol. 2017	Y	1
107	10.1097/IOP.0000000000000837	Charles NC, Jakobiec FA, Patel P., Periorbital Dermoid Cyst With Unique Trichilemmal Differentiation. Ophthal Plast Reconstr Surg. 2017	Y	1
108	10.1080/09286586.2016.1255763	Sasongko MB, Agni AN, Wardhana FS, Kotha SP, Gupta P, Widayanti TW, Supanji, Widyaputri F, Widyaningrum R, Wong TY, Kawasaki R, Wang JJ, Pawiroranu S., Rationale and Methodology for a Community-Based Study of Diabetic Retinopathy in an Indonesian Population with Type 2 Diabetes Mellitus: The Jogjakarta Eye Diabetic Study in the Community. Ophthalmic Epidemiol. 2017	N	0
109	10.1111/jnc.14070	Bordone MP, González Fleitas MF, Pasquini LA, Bosco A, Sande PH, Rosenstein RE, Dorfman D., Involvement of microglia in early axoglial alterations of the optic nerve induced by experimental glaucoma. J Neurochem. 2017	Y	1
110	10.1016/j.ajpath.2017.08.025	Kumar S, Nakashizuka H, Jones A, Lambert A, Zhao X, Shen M, Parker M, Wang S, Berriochoa Z, Fnu A, VanBeuge S, Chévez-Barrios P, Tso M, Rainier J, Fu Y., Proteolytic Degradation and Inflammation Play Critical Roles in Polypoidal Choroidal Vasculopathy. Am J Pathol. 2017	Y	1
111	10.1017/S0031182017000270	Chen SJ, Zhang YX, Huang SG, Lu FL., Galectins expressed differently in genetically susceptible C57BL/6 and resistant BALB/c mice during acute ocular Toxoplasma gondii infection. Parasitology. 2017	N	0
112	10.1111/aos.13226	Wirth MA, Freiberg F, Pfau M, Wons J, Becker MD, Michels S., Optical coherence tomography angiography in age-related macular degeneration: persistence of vascular network in quiescent choroidal neovascularization. Acta Ophthalmol. 2017	Y	1
113	10.1136/bjophthalmol-2015-307837	Dhalla K, Cousens S, Murdoch IE., Phacoemulsification compared with phacotrabeculectomy surgery: a within-person observational cohort study. Br J Ophthalmol. 2017	N	0
114	10.3171/2016.12.SPINE16540	Ibrahim TF, Sweis RT, Nockels RP., Reversible postoperative blindness caused by bilateral status epilepticus amauroticus following thoracolumbar deformity correction: case report. J Neurosurg Spine. 2017	N	0
115	10.1097/ICO.0000000000001263	Oliva-Biénzobas V, Navas A, C Astiazarán M, Chacón-Camacho OF, A Bermúdez-Magner J, Takane M, Graue-Hernández E, Zenteno JC., CYP1B1 Cytopathy: Uncommon Phenotype of a Homozygous CYP1B1 Deletion as Internal Corneal Ulcer of Von Hippel. Cornea. 2017	Y	1
				68

## Sheet: Cameroon
ID Number (please do not modify)	Digital Object Identifier (DOI)	Reference	Access to Full text (Y/N)	Column 0/1
1	10.1016/j.neulet.2016.12.057	Azuchi Y, Kimura A, Guo X, Akiyama G, Noro T, Harada C, Nishigaki A, Namekata K, Harada T., Valproic acid and ASK1 deficiency ameliorate optic neuritis and neurodegeneration in an animal model of multiple sclerosis. Neurosci Lett. 2017	No	0
2	10.1111/cge.12895	Kletke S, Batmanabane V, Dai T, Vincent A, Li S, Gordon KA, Papsin BC, Cushing SL, Héon E., The combination of vestibular impairment and congenital sensorineural hearing loss predisposes patients to ocular anomalies, including Usher syndrome. Clin Genet. 2017	No	0
3	10.1097/DSS.0000000000000787	Martínez-Palmer A, Calsina-Prat M, Ormaechea N, Toll A., Reconstruction of Combined Upper and Lower Eyelid Defects in a Patient With Lentigo Maligna. Dermatol Surg. 2017	NO	0
4	10.1093/brain/awx236	Niturad CE, Lev D, Kalscheuer VM, Charzewska A, Schubert J, Lerman-Sagie T, Kroes HY, Oegema R, Traverso M, Specchio N, Lassota M, Chelly J, Bennett-Back O, Carmi N, Koffler-Brill T, Iacomino M, Trivisano M, Capovilla G, Striano P, Nawara M, Rzonca S, Fischer U, et al., Rare GABRA3 variants are associated with epileptic seizures, encephalopathy and dysmorphic features. Brain. 2017	Y	1
5	10.1080/13816810.2016.1188124	Tyagi P, Juma Z, Reddy AR., Retinal features in Mulvihill-Smith syndrome. Ophthalmic Genet. 2017	Y	1
6	10.1097/WNO.0000000000000455	Mendes Marques NBPS, Barros SR, Miranda AF, Nobre Cardoso J, Parreira S, Fonseca T, Donaire NM, Campos N., Horizontal Gaze Palsy and Progressive Scoliosis With ROBO 3 Mutations in Patients From Cape Verde. J Neuroophthalmol. 2017	Y	1
7	10.1080/09286586.2017.1313992	Oye J, Mactaggart I, Polack S, Schmidt E, Tamo V, Okwen M, Kuper H., Prevalence and Causes of Visual Impairment in Fundong District, North West Cameroon: Results of a Population-Based Survey. Ophthalmic Epidemiol. 2017	Y	1
8	10.1016/j.clae.2017.01.003	Gifford K, Gifford P, Hendicott PL, Schmid KL., Near binocular visual function in young adult orthokeratology versus soft contact lens wearers. Cont Lens Anterior Eye. 2017	Y	1
9	10.2217/bmm-2017-0218	Wostyn P, De Deyn PP., Intracranial pressure-induced optic nerve sheath response as a predictive biomarker for optic disc edema in astronauts. Biomark Med. 2017	NO	0
10	10.1097/WNO.0000000000000555	Morrow MJ, Ko MW., Should Oral Corticosteroids Be Used to Treat Demyelinating Optic Neuritis? J Neuroophthalmol. 2017	Y	1
11	10.1080/09273972.2017.1349816	Morad Y, Pras E, Nemet A., Superior and Lateral Rectus Myopexy for Acquired Adult Distance Esotropia: A "One Size Fits All" Surgery. Strabismus. 2017	Y	1
12	10.1097/IOP.0000000000000731	Repp DJ, Rubinstein TJ, Herreid PA, Sires BS., Biomechanics of the Levator Aponeurosis. Ophthal Plast Reconstr Surg. 2017	Y	1
13	10.1007/s00417-017-3817-4	De Gregorio A, Pedrotti E, Stevan G, Montali M, Morselli S., Safety and efficacy of multiple cyclocoagulation of ciliary bodies by high-intensity focused ultrasound in patients with glaucoma. Graefes Arch Clin Exp Ophthalmol. 2017	NO	0
14	10.1111/aos.13445	Ten Berge JCEM, van Dijk EHC, Schreurs MWJ, Vermeer J, Boon CJF, Rothova A., Antiretinal antibodies in central serous chorioretinopathy: prevalence and clinical implications. Acta Ophthalmol. 2018	Y	1
15	10.1007/s10072-016-2785-5	Kang H, Kim SK, Park KJ, Choi NC, Kwon OY, Lim BH., Hemianopic line bisection error in a patient with Alzheimer's disease. Neurol Sci. 2017	NO	0
16	10.1212/WNL.0000000000004312	Hennes EM, Baumann M, Schanda K, Anlar B, Bajer-Kornek B, Blaschek A, Brantner-Inthaler S, Diepold K, Eisenkölbl A, Gotwald T, Kuchukhidze G, Gruber-Sedlmayr U, Häusler M, Höftberger R, Karenfort M, Klein A, Koch J, Kraus V, Lechner C, Leiz S, Leypoldt F, Mader S, et al., Prognostic relevance of MOG antibodies in children with an acquired demyelinating syndrome. Neurology. 2017	Y	1
17	10.1016/j.oftal.2016.08.006	Pareja-Ríos A, Bonaque-González S, Serrano-García M, Cabrera-López F, Abreu-Reyes P, Marrero-Saavedra MD., Tele-ophthalmology for diabetic retinopathy screening: 8 years of experience. Arch Soc Esp Oftalmol. 2017	Y	1
18	10.1007/s00417-016-3530-8	Mikhail M, El-Rayes EN, Kojima K, Ajlan R, Rezende F., Catheter-guided suprachoroidal buckling of rhegmatogenous retinal detachments secondary to peripheral retinal breaks. Graefes Arch Clin Exp Ophthalmol. 2017	NO	0
19	10.1007/s00417-017-3616-y	Shah MA, Agrawal R, Teoh R, Shah SM, Patel K, Gupta S, Gosai S., Pediatric ocular trauma score as a prognostic tool in the management of pediatric traumatic cataracts. Graefes Arch Clin Exp Ophthalmol. 2017	NO	0
20	10.1016/j.jfo.2016.09.014	Zaarour K, Slim E, Antoun J, Waked N., Thick keratoconic cornea associated with posterior polymorphous corneal dystrophy. J Fr Ophtalmol. 2017	Y	1
21	10.1097/IAE.0000000000001311	Shifera AS, Pennesi ME, Yang P, Lin P., ULTRA-WIDE-FIELD FUNDUS AUTOFLUORESCENCE FINDINGS IN PATIENTS WITH ACUTE ZONAL OCCULT OUTER RETINOPATHY. Retina. 2017	NO	0
22	10.1080/13816810.2017.1354384	Bryant L, Lozynska O, Han G, Morgan JIW, Gai X, Maguire AM, Aleman T, Bennett J., On variants and disease-causing mutations: Case studies of a SEMA4A variant identified in inherited blindness. Ophthalmic Genet. 2018	Y	1
23	10.1097/IAE.0000000000001391	Cheung CMG, Yanagi Y, Mohla A, Lee SY, Mathur R, Chan CM, Yeo I, Wong TY., CHARACTERIZATION AND DIFFERENTIATION OF POLYPOIDAL CHOROIDAL VASCULOPATHY USING SWEPT SOURCE OPTICAL COHERENCE TOMOGRAPHY ANGIOGRAPHY. Retina. 2017	Y	1
24	10.1016/j.jcjo.2016.08.003	Lassalle S, Maschi C, Caujolle JP, Giordanengo V, Hofman P., Inverted conjunctival papilloma: a certainly underestimated high-risk lesion for carcinomatous transformation-a case report. Can J Ophthalmol. 2017	Y	1
25	10.2217/epi-2017-0060	Piras IS, Mills G, Llaci L, Naymik M, Ramsey K, Belnap N, Balak CD, Jepsen WM, Szelinger S, Siniard AL, Lewis CR, LaFleur M, Richholt RF, De Both MD, Avela K, Rangasamy S, Craig DW, Narayanan V, Järvelä I, Huentelman MJ, Schrauwen I., Exploring genome-wide DNA methylation patterns in Aicardi syndrome. Epigenomics. 2017	NO	0
26	10.1097/IJG.0000000000000551	Perez CI, Mellado F, Jones A, Colvin R., Trabeculectomy Combined With Collagen Matrix Implant (Ologen). J Glaucoma. 2017	Y	1
27	10.1016/j.jcjo.2016.07.015	De Oliveira PR, Berger AR, Chow DR., Optical coherence tomography angiography in chorioretinal disorders. Can J Ophthalmol. 2017	Y	1
28	10.1016/j.jneuroim.2017.07.006	Yoshikura N, Kimura A, Hayashi Y, Inuzuka T., Anti-C1q autoantibodies in patients with neuromyelitis optica spectrum disorders. J Neuroimmunol. 2017	Y	1
29	10.1097/SCS.0000000000003431	Na J, Choi SY, Baek S, Lee H., Hemorrhage and Infarction of the Conjunctiva and Orbit in Essential Thrombocythemia. J Craniofac Surg. 2017	Y	1
30	10.1097/ICB.0000000000000374	Despréaux R, Mrejen S, Quentel G, Cohen SY., EN FACE OPTICAL COHERENCE TOMOGRAPHY (OCT) AND OCT ANGIOGRAPHY FINDINGS IN RETINAL ASTROCYTIC HAMARTOMAS. Retin Cases Brief Rep. 2017	Y	1
31	10.1136/bjophthalmol-2016-309996	Dagi LR, MacKinnon S, Zurakowski D, Prabhu SP., Rectus muscle excyclorotation and V-pattern strabismus: a quantitative appraisal of clinical relevance in syndromic craniosynostosis. Br J Ophthalmol. 2017	NO	0
32	10.1097/IAE.0000000000001351	Medina CA, Ortiz AG, Relhan N, Smiddy WE, Townsend JH, Flynn HW Jr., MACULAR HOLE AFTER PARS PLANA VITRECTOMY FOR RHEGMATOGENOUS RETINAL DETACHMENT. Retina. 2017	NO	0
33	10.1080/09286586.2016.1257027	Malkin AG, Goldstein JE, Massof RW., Multivariable Regression Model of the EuroQol 5-Dimension Questionnaire in Patients Seeking Outpatient Low Vision Rehabilitation. Ophthalmic Epidemiol. 2017	Y	1
34	10.1007/s00018-017-2643-5	Kudo A., Introductory review: periostin-gene and protein structure. Cell Mol Life Sci. 2017	NO	0
35	10.1080/02713683.2017.1344712	Wang T, Zhu L, Peng Y, Shen N, Yu Y, Yao M, Zhu J., Photochemical Cross-Linking for Penetrating Corneal Wound Closure in Enucleated Porcine Eyes. Curr Eye Res. 2017	Y	1
36	10.1093/brain/awx219	Gerber S, Charif M, Chevrollier A, Chaumette T, Angebault C, Kane MS, Paris A, Alban J, Quiles M, Delettre C, Bonneau D, Procaccio V, Amati-Bonneau P, Reynier P, Leruez S, Calmon R, Boddaert N, Funalot B, Rio M, Bouccara D, Meunier I, Sesaki H, et al., Mutations in DNM1L, as in OPA1, result indominant optic atrophy despite opposite effectson mitochondrial fusion and fission. Brain. 2017	Y	1
37	10.1097/IAE.0000000000001683	Cheng YC, Shen JH, Chao AN, Chen KJ., Later Development of Posterior Staphyloma in Choroidal Osteoma With Choroidal Neovascularization. Retina. 2017	Y	1
38	10.2174/1567202614666161104115440	Shimazawa M, Inoue Y, Masuda T, Onodera R, Tahara K, Shimizu Y, Mibe Y, Tsuruma K, Takeuchi H, Hara H., Topical Diclofenac-Loaded Liposomes Ameliorate Laser-Induced Choroidal Neovascularization in Mice and Non-Human Primates. Curr Neurovasc Res. 2017	Y	1
39	10.1007/s00405-016-4308-7	Ozsutcu M, Balci O, Tanriverdi C, Demirci G., Efficacy of adjunctive mitomycin C in transcanalicular diode laser dacryocystorhinostomy. Eur Arch Otorhinolaryngol. 2017	NO	0
40	10.1136/bjophthalmol-2016-309775	Aixinjueluo W, Usui T, Miyai T, Toyono T, Sakisaka T, Yamagami S., Accelerated transepithelial corneal cross-linking for progressive keratoconus: a prospective study of 12 months. Br J Ophthalmol. 2017	NO	0
41	10.1016/j.ijporl.2016.11.027	Yin T, van der Meer G., Neonatal airway obstruction in bilateral congenital dacryocystocoele: Case report and review of the literature. Int J Pediatr Otorhinolaryngol. 2017	Y	1
42	10.1007/s00417-017-3860-1	Chan JCW, Choy BNK, Chan OCC, Li KKW., Early intraocular pressure change after peripheral iridotomy with ultralow fluence pattern scanning laser and Nd:YAG laser in primary angle-closure suspect: Kowloon East Pattern Scanning Laser Study Report No. 3. Graefes Arch Clin Exp Ophthalmol. 2018	NO	0
43	10.1136/bjophthalmol-2016-309245	Sharma S, Ang M, Najjar RP, Sng C, Cheung CY, Rukmini AV, Schmetterer L, Milea D., Optical coherence tomography angiography in acute non-arteritic anterior ischaemic optic neuropathy. Br J Ophthalmol. 2017	NO	0
44	10.1080/01676830.2017.1279664	Medel R, Balaguer Solé Ò, Vasquez LM., Inferior tarsal muscle-conjunctivectomy for reverse ptosis repair: A novel technique. Orbit. 2017	Y	1
45	10.1038/eye.2017.25	Betts T, Ahmed S, Maguire S, Watts P., Characteristics of non-vitreoretinal ocular injury in child maltreatment: a systematic review. Eye (Lond). 2017	NO	0
46	10.1007/s10792-016-0261-0	Altunel O, Duru N, Goktas A, Ozkose A, Goktas E, Atas M., Evaluation of foveal photoreceptor layer in eyes with macular edema associated with branch retinal vein occlusion after ozurdex treatment. Int Ophthalmol. 2017	NO	0
47	10.1159/000478705	Motohashi R, Noma H, Yasuda K, Kotake O, Goto H, Shimura M., Dynamics of Inflammatory Factors in Aqueous Humor during Ranibizumab or Aflibercept Treatment for Age-Related Macular Degeneration. Ophthalmic Res. 2017	Y	1
48	10.1016/j.jns.2017.01.033	Kang S, Shaikh AG., Acquired pendular nystagmus. J Neurol Sci. 2017	Y	1
49	10.1097/WNO.0000000000000503	Sadaka A, Schockman SL, Golnik KC., Evaluation of Horner Syndrome in the MRI Era. J Neuroophthalmol. 2017	Y	1
50	10.1136/bjophthalmol-2016-310105	Jirawison C, Liu Y, Surasit K, Maningding E, Kamphaengkham S, Ausayakhun S, Heiden D, Margolis TP, Gonzales JA, Acharya NR, Keenan JD., Fundus findings in a series of patients with extrapulmonary tuberculosis in Thailand. Br J Ophthalmol. 2017	NO	0
51	10.1016/j.neuroimage.2016.12.053	Pelland M, Orban P, Dansereau C, Lepore F, Bellec P, Collignon O., State-dependent modulation of functional connectivity in early blind individuals. Neuroimage. 2017	Y	1
52	10.1097/ICO.0000000000001130	Zhang X, Bitar M, Davis RM., Spontaneous Canalicular Plug Erosion After Punctal Plug Placement. Cornea. 2017	Y	1
53	10.3928/23258160-20171030-04	Stephens JD, Adam MK, Todorich B, Faia LJ, Garg S, Dunn JP, Mehta S., Optical Coherence Tomography Findings in Endogenous Fungal Chorioretinitis, Retinitis, and Endophthalmitis. Ophthalmic Surg Lasers Imaging Retina. 2017	Y	1
54	10.1097/ICL.0000000000000297	Hashemi H, Rastad H, Emamian MH, Fotouhi A., Floppy Eyelid Syndrome and Its Determinants in Iranian Adults: A Population-Based Study. Eye Contact Lens. 2017	NO	0
55	10.1177/2165079916686592	Lurati AR., Identifying Personal Risk Factors for Falls in the Workplace. Workplace Health Saf. 2017	Y	1
56	10.1016/j.ad.2016.07.006	Miura T, Ohtsuka M, Yamamoto T., Sweet's syndrome-like eruption in association with the exacerbation of Behçet's disease after the Great East Japan Earthquake. Actas Dermosifiliogr. 2017	Y	1
57	10.1001/jamaophthalmol.2017.1009	Borkar DS, Homayounfar G, Tham VM, Ray KJ, Vinoya AC, Uchida A, Acharya NR., Association Between Thyroid Disease and Uveitis: Results From the Pacific Ocular Inflammation Study. JAMA Ophthalmol. 2017	Y	1
58	10.1111/opo.12332	Li SM, Kang MT, Wu SS, Meng B, Sun YY, Wei SF, Liu L, Peng X, Chen Z, Zhang F, Wang N., Studies using concentric ring bifocal and peripheral add multifocal contact lenses to slow myopia progression in school-aged children: a meta-analysis. Ophthalmic Physiol Opt. 2017	Y	1
59	10.1097/IAE.0000000000001666	Hwang CK, Kolomeyer AM, Brucker AJ, Morgan JIW, Nichols CW, Aleman TS., Localized Bilateral Juxtafoveal Photoreceptor Loss in POEMS: A New Association. Retina. 2017	Y	1
60	10.1159/000473701	Daien V, Le Pape A, Heve D, Villain M, Bremond Gignac D; Collaborators of the Epidemiology and Safety Program (EPISAFE).., Incidence and Characteristics of Congenital Cataract Surgery in France from 2010 to 2012: The EPISAFE Program. Ophthalmic Res. 2017	Y	1
61	10.2337/db16-1364	Simó R, Hernández C., GLP-1R as a Target for the Treatment of Diabetic Retinopathy: Friend or Foe? Diabetes. 2017	NO	0
62	10.1016/j.ajo.2016.11.009	Ares WJ, Tonetti D, Yu JY, Monaco EA, Flickinger JC, Lunsford LD., Gamma Knife Radiosurgery for Uveal Metastases: Report of Three Cases and a Review of the Literature. Am J Ophthalmol. 2017	Y	1
63	10.1007/s40618-017-0608-z	Bartalena L, Veronesi G, Krassas GE, Wiersinga WM, Marcocci C, Marinò M, Salvi M, Daumerie C, Bournaud C, Stahl M, Sassi L, Azzolini C, Boboridis KG, Mourits MP, Soeters MR, Baldeschi L, Nardi M, Currò N, Boschi A, Bernard M, von Arx G, Perros P, et al., Does early response to intravenous glucocorticoids predict the final outcome in patients with moderate-to-severe and active Graves' orbitopathy?…	NO	0
64	10.1016/j.jneuroim.2017.08.003	Palterer B, Brugnolo F, Sieni E, Barilaro A, Parronchi P., Neuromyelitis optica, atypical hemophagocytic lymphohistiocytosis and heterozygous perforin A91V mutation. J Neuroimmunol. 2017	Y	1
65	10.1111/ped.13149	Demircioğlu Kılıc B, Akbalık Kara M, Ozcelik AA, Ustunsoy H, Balat A., Brachial artery pseudoaneurysm: Rare finding in childhood Behcet's disease. Pediatr Int. 2017	Y	1
66	10.3233/JAD-161190	Shellington EM, Heath M, Gill DP, Petrella RJ., Long-Term Maintenance of Executive-Related Oculomotor Improvements in Older Adults with Self-Reported Cognitive Complaints Following a 24-Week Multiple Modality Exercise Program. J Alzheimers Dis. 2017	NO	0
67	10.1055/s-0043-100116	Li J, Cai Y, Sun X, Yao D, Xia J., MiR-346 and TRAb as Predicative Factors for Relapse in Graves' Disease Within One Year. Horm Metab Res. 2017	Y	1
68	10.1097/ICO.0000000000001100	Farooq AV., Herpes Simplex Virus Keratitis and Resistance to Acyclovir. Cornea. 2017	Y	1
69	10.1080/02713683.2017.1341534	Modrzejewska M, Wiącek MP., A Novel Approach to the Differentiation of Intrabulbar Tumors in Color Doppler Imaging. Curr Eye Res. 2017	Y	1
70	10.1080/02713683.2017.1358373	Yamada Y, Suzuma K, Onizuka N, Uematsu M, Mohamed YH, Kitaoka T., Evaluation of retinal blood flow before and after panretinal photocoagulation using pattern scan laser for diabetic retinopathy. Curr Eye Res. 2017	Y	1
71	10.1097/IOP.0000000000000723	Chisholm SAM, Couch SM, Custer PL., Etiology and Management of Allergic Eyelid Dermatitis. Ophthal Plast Reconstr Surg. 2017	Y	1
72	10.1016/j.expneurol.2016.08.004	Eapen BC, Murphy DP, Cifu DX., Neuroprosthetics in amputee and brain injury rehabilitation. Exp Neurol. 2017	Y	1
73	10.1136/bjophthalmol-2016-309460	Bhardwaj M, Sen S, Chosdol K, Sharma A, Pushker N, Kashyap S, Bakhshi S, Bajaj MS., miRNA-200c and miRNA-141 as potential prognostic biomarkers and regulators of epithelial-mesenchymal transition in eyelid sebaceous gland carcinoma. Br J Ophthalmol. 2017	NO	0
74	10.1136/jnnp-2017-315782	Evoli A, Alboini PE, Iorio R, Damato V, Bartoccioni E., Pattern of ocular involvement in myasthenia gravis with MuSK antibodies. J Neurol Neurosurg Psychiatry. 2017	NO	0
75	10.3928/01913913-20170309-01	Rajavi Z, Feizi M, Behradfar N, Yaseri M, Sayanjali S, Motevaseli T, Sabbaghi H, Faghihi M., Inferior Oblique Overaction: Anterior Transposition Versus Myectomy. J Pediatr Ophthalmol Strabismus. 2017	NO	0
76	10.1080/02713683.2016.1223317	Jia Y, Hu DN, Sun J, Zhou J., Correlations Between MMPs and TIMPs Levels in Aqueous Humor from High Myopia and Cataract Patients. Curr Eye Res. 2017	Y	1
77	10.1097/IOP.0000000000000536	Cole SC, Eftekhari K, Oberg T, Mamalis N, Anderson RL., Osteolytic Sarcoidosis of the Orbital Roof Masquerading as a Malignant Orbital Lesion. Ophthal Plast Reconstr Surg. 2017	Y	1
78	10.1111/desc.12379	Hadad BS, Maurer D, Lewis TL., The role of early visual input in the development of contour interpolation: the case of subjective contours. Dev Sci. 2017	Y	1
79	10.3109/13816810.2016.1164192	Topçu V, Alp MY, Alp CK, Bakır A, Geylan D, Yılmazoğlu MÖ., A new familial case of Jalili syndrome caused by a novel mutation in CNNM4. Ophthalmic Genet. 2017	Y	1
80	10.1016/j.ophtha.2017.07.010	Pflugfelder SC, de Paiva CS., The Pathophysiology of Dry Eye Disease: What We Know and Future Directions for Research. Ophthalmology. 2017	NO	0
81	10.14670/HH-11-820	Kimura A, Namekata K, Guo X, Harada C, Harada T., Dock3-NMDA receptor interaction as a target for glaucoma therapy. Histol Histopathol. 2017	NO	0
82	10.1016/j.oftal.2016.03.021	Cañizares B, Yago I, Piñero Á, Ruiz M., Unilateral persistent fetal vasculature coexisting with anterior segment dysgenesia. Arch Soc Esp Oftalmol. 2017	Y	1
83	10.1136/jmedgenet-2016-104212	Gerber S, Ding MG, Gérard X, Zwicker K, Zanlonghi X, Rio M, Serre V, Hanein S, Munnich A, Rotig A, Bianchi L, Amati-Bonneau P, Elpeleg O, Kaplan J, Brandt U, Rozet JM., Compound heterozygosity for severe and hypomorphic NDUFS2 mutations cause non-syndromic LHON-like optic neuropathy. J Med Genet. 2017	NO	0
84	10.1093/hmg/ddx168	Whitman MC, Engle EC., Ocular congenital cranial dysinnervation disorders (CCDDs): insights into axon growth and guidance. Hum Mol Genet. 2017	NO	0
85	10.1016/j.ophtha.2017.01.027	Wu Z, Saunders LJ, Daga FB, Diniz-Filho A, Medeiros FA., Frequency of Testing to Detect Visual Field Progression Derived Using a Longitudinal Cohort of Glaucoma Patients. Ophthalmology. 2017	Y	1
86	10.1038/eye.2017.34	Midena E, Pilotto E., Microperimetry in age: related macular degeneration. Eye (Lond). 2017	NO	0
87	10.1097/IOP.0000000000000806	Hirabayashi KE, Kalin-Hajdu E, Brodie FL, Kersten RC, Russell MS, Vagefi MR., Retrobulbar Injection of Amphotericin B for Orbital Mucormycosis. Ophthal Plast Reconstr Surg. 2017	Y	1
88	10.1097/ICU.0000000000000456	Sozeri Y, Salim S., Anticlotting agents and the surgical management of glaucoma. Curr Opin Ophthalmol. 2018	Y	1
89	10.1097/IAE.0000000000001368	Yong Huang X, Wu N, Li N, Wang Y, Shakoor A., Diagnostic and Therapeutic Challenges. Retina. 2017	Y	1
Y90	10.1007/s12031-016-0869-6	D'Amico AG, Maugeri G, Bucolo C, Saccone S, Federico C, Cavallaro S, D'Agata V., Nap Interferes with Hypoxia-Inducible Factors and VEGF Expression in Retina of Diabetic Rats. J Mol Neurosci. 2017	NO	0
91	10.1097/ICO.0000000000001129	Nakagawa H, Hattori T, Koike N, Ehara T, Narimatsu A, Kumakura S, Matsumoto T, Goto H., Number of Bacteria and Time of Coincubation With Bacteria Required for the Development of Acanthamoeba Keratitis. Cornea. 2017	Y	1
92	10.1097/IAE.0000000000001408	Pertl L, Haas A, Hausberger S, Pichler T, Rabensteiner DF, Seidel G, Malle EM, Weger M., CHANGE OF CHOROIDAL VOLUME IN UNTREATED CENTRAL SEROUS CHORIORETINOPATHY. Retina. 2017	Y	1
93	10.1002/dmrr.2860	Omori Y, Yanagisawa K, Sato A, Uchigata Y., The importance of nonstop treatment after delivery for pregnant women with type 2 diabetes. Diabetes Metab Res Rev. 2017	Y	1
94	10.1016/j.anai.2017.01.027	Bork K, Brehler R, Witzke G, Boor S, Heineke W, Hardt J., Blindness, tetraspasticity, and other signs of irreversible brain damage in hereditary angioedema. Ann Allergy Asthma Immunol. 2017	Y	1
95	10.1007/s10067-016-3417-4	Vitale A, Emmi G, Lopalco G, Gentileschi S, Silvestri E, Fabiani C, Urban ML, Frediani B, Galeazzi M, Iannone F, Rigante D, Cantarini L., Adalimumab effectiveness in Behçet's disease: short and long-term data from a multicenter retrospective observational study. Clin Rheumatol. 2017	NO	0
96	10.1038/nprot.2017.032	Lückoff A, Scholz R, Sennlaub F, Xu H, Langmann T., Comprehensive analysis of mouse retinal mononuclear phagocytes. Nat Protoc. 2017	Y	1
97	10.1097/ICO.0000000000001038	Micali A, Roszkowska AM, Postorino EI, Rania L, Aragona E, Wylegala E, Nowinska A, Ieni A, Calimeri S, Pisani A, Aragona P, Puzzolo D., Comparative Confocal and Histopathological Study of Corneal Changes in Multiple Myeloma. Cornea. 2017	Y	1
98	10.1097/ICU.0000000000000385	Daya SM., Conjunctival-limbal autograft. Curr Opin Ophthalmol. 2017	Y	1
99	10.1007/s10384-016-0490-9	Shalaby U., Diltiazem co treatment with cyclosporine for induction of disease remission in sight-threatening non-infectious intraocular inflammation. Jpn J Ophthalmol. 2017	NO	0
100	10.1016/j.ajo.2016.12.023	Tavares Ferreira J, Proença R, Alves M, Dias-Santos A, Santos BO, Cunha JP, Papoila AL, Abegão Pinto L., Retina and Choroid of Diabetic Patients Without Observed Retinal Vascular Changes: A Longitudinal Study. Am J Ophthalmol. 2017	Y	1
101	10.1016/j.jcjo.2016.07.026	Eom Y, Song JS, Kim HM., Spectacle plane add power of multifocal intraocular lenses according to effective lens position. Can J Ophthalmol. 2017	Y	1
102	10.1097/IAE.0000000000001401	Tye A, Klufas MA, McCannel CA, McCannel TA., Intracameral Air in Phacovitrectomy for Maintaining Intraocular Lens Position. Retina. 2017	y	1
103	10.1111/aos.13385	Jacobsen AG, Brost B, Vorum H, Hargitai J., Functional benefits and patient satisfaction with upper blepharoplasty - evaluated by objective and subjective outcome measures. Acta Ophthalmol. 2017	NO	0
104	10.1136/bjophthalmol-2016-309504	Himori N, Kunikata H, Kawasaki R, Shiga Y, Omodaka K, Takahashi H, Miyata T, Nakazawa T., The association between skin autofluorescence and mean deviation in patients with open-angle glaucoma. Br J Ophthalmol. 2017	NO	0
105	10.1007/s00417-017-3696-8	Callizo J, Pfeiffer S, Lahme E, van Oterendorp C, Khattab M, Bemme S, Kulanga M, Hoerauf H, Feltgen N., Risk of progression in macula-on rhegmatogenous retinal detachment. Graefes Arch Clin Exp Ophthalmol. 2017	Y	1
106	10.1111/cup.12909	Motaparthi K., Pseudoherpetic transient acantholytic dermatosis (Grover disease): case series and review of the literature. J Cutan Pathol. 2017	Y	1
107	10.1097/IOP.0000000000000837	Charles NC, Jakobiec FA, Patel P., Periorbital Dermoid Cyst With Unique Trichilemmal Differentiation. Ophthal Plast Reconstr Surg. 2017	Y	1
108	10.1080/09286586.2016.1255763	Sasongko MB, Agni AN, Wardhana FS, Kotha SP, Gupta P, Widayanti TW, Supanji, Widyaputri F, Widyaningrum R, Wong TY, Kawasaki R, Wang JJ, Pawiroranu S., Rationale and Methodology for a Community-Based Study of Diabetic Retinopathy in an Indonesian Population with Type 2 Diabetes Mellitus: The Jogjakarta Eye Diabetic Study in the Community. Ophthalmic Epidemiol. 2017	Y	1
109	10.1111/jnc.14070	Bordone MP, González Fleitas MF, Pasquini LA, Bosco A, Sande PH, Rosenstein RE, Dorfman D., Involvement of microglia in early axoglial alterations of the optic nerve induced by experimental glaucoma. J Neurochem. 2017	Y	1
110	10.1016/j.ajpath.2017.08.025	Kumar S, Nakashizuka H, Jones A, Lambert A, Zhao X, Shen M, Parker M, Wang S, Berriochoa Z, Fnu A, VanBeuge S, Chévez-Barrios P, Tso M, Rainier J, Fu Y., Proteolytic Degradation and Inflammation Play Critical Roles in Polypoidal Choroidal Vasculopathy. Am J Pathol. 2017	NO	0
111	10.1017/S0031182017000270	Chen SJ, Zhang YX, Huang SG, Lu FL., Galectins expressed differently in genetically susceptible C57BL/6 and resistant BALB/c mice during acute ocular Toxoplasma gondii infection. Parasitology. 2017	Y	1
112	10.1111/aos.13226	Wirth MA, Freiberg F, Pfau M, Wons J, Becker MD, Michels S., Optical coherence tomography angiography in age-related macular degeneration: persistence of vascular network in quiescent choroidal neovascularization. Acta Ophthalmol. 2017	Y	1
113	10.1136/bjophthalmol-2015-307837	Dhalla K, Cousens S, Murdoch IE., Phacoemulsification compared with phacotrabeculectomy surgery: a within-person observational cohort study. Br J Ophthalmol. 2017	Y	1
114	10.3171/2016.12.SPINE16540	Ibrahim TF, Sweis RT, Nockels RP., Reversible postoperative blindness caused by bilateral status epilepticus amauroticus following thoracolumbar deformity correction: case report. J Neurosurg Spine. 2017	Y	1
115	10.1097/ICO.0000000000001263	Oliva-Biénzobas V, Navas A, C Astiazarán M, Chacón-Camacho OF, A Bermúdez-Magner J, Takane M, Graue-Hernández E, Zenteno JC., CYP1B1 Cytopathy: Uncommon Phenotype of a Homozygous CYP1B1 Deletion as Internal Corneal Ulcer of Von Hippel. Cornea. 2017	Y	1
				77

## Sheet: Canada
ID Number (please do not modify)	Digital Object Identifier (DOI)	Reference	Access to Full text (Y/N)	Column 0/1
1	10.1016/j.neulet.2016.12.057	Azuchi Y, Kimura A, Guo X, Akiyama G, Noro T, Harada C, Nishigaki A, Namekata K, Harada T., Valproic acid and ASK1 deficiency ameliorate optic neuritis and neurodegeneration in an animal model of multiple sclerosis. Neurosci Lett. 2017	Y	1
2	10.1111/cge.12895	Kletke S, Batmanabane V, Dai T, Vincent A, Li S, Gordon KA, Papsin BC, Cushing SL, Héon E., The combination of vestibular impairment and congenital sensorineural hearing loss predisposes patients to ocular anomalies, including Usher syndrome. Clin Genet. 2017	Y	1
3	10.1097/DSS.0000000000000787	Martínez-Palmer A, Calsina-Prat M, Ormaechea N, Toll A., Reconstruction of Combined Upper and Lower Eyelid Defects in a Patient With Lentigo Maligna. Dermatol Surg. 2017	N	0
4	10.1093/brain/awx236	Niturad CE, Lev D, Kalscheuer VM, Charzewska A, Schubert J, Lerman-Sagie T, Kroes HY, Oegema R, Traverso M, Specchio N, Lassota M, Chelly J, Bennett-Back O, Carmi N, Koffler-Brill T, Iacomino M, Trivisano M, Capovilla G, Striano P, Nawara M, Rzonca S, Fischer U, et al., Rare GABRA3 variants are associated with epileptic seizures, encephalopathy and dysmorphic features. Brain. 2017	Y	1
5	10.1080/13816810.2016.1188124	Tyagi P, Juma Z, Reddy AR., Retinal features in Mulvihill-Smith syndrome. Ophthalmic Genet. 2017	Y	1
6	10.1097/WNO.0000000000000455	Mendes Marques NBPS, Barros SR, Miranda AF, Nobre Cardoso J, Parreira S, Fonseca T, Donaire NM, Campos N., Horizontal Gaze Palsy and Progressive Scoliosis With ROBO 3 Mutations in Patients From Cape Verde. J Neuroophthalmol. 2017	N	0
7	10.1080/09286586.2017.1313992	Oye J, Mactaggart I, Polack S, Schmidt E, Tamo V, Okwen M, Kuper H., Prevalence and Causes of Visual Impairment in Fundong District, North West Cameroon: Results of a Population-Based Survey. Ophthalmic Epidemiol. 2017	Y	1
8	10.1016/j.clae.2017.01.003	Gifford K, Gifford P, Hendicott PL, Schmid KL., Near binocular visual function in young adult orthokeratology versus soft contact lens wearers. Cont Lens Anterior Eye. 2017	Y	1
9	10.2217/bmm-2017-0218	Wostyn P, De Deyn PP., Intracranial pressure-induced optic nerve sheath response as a predictive biomarker for optic disc edema in astronauts. Biomark Med. 2017	N	0
10	10.1097/WNO.0000000000000555	Morrow MJ, Ko MW., Should Oral Corticosteroids Be Used to Treat Demyelinating Optic Neuritis? J Neuroophthalmol. 2017	N	0
11	10.1080/09273972.2017.1349816	Morad Y, Pras E, Nemet A., Superior and Lateral Rectus Myopexy for Acquired Adult Distance Esotropia: A "One Size Fits All" Surgery. Strabismus. 2017	Y	1
12	10.1097/IOP.0000000000000731	Repp DJ, Rubinstein TJ, Herreid PA, Sires BS., Biomechanics of the Levator Aponeurosis. Ophthal Plast Reconstr Surg. 2017	N	0
13	10.1007/s00417-017-3817-4	De Gregorio A, Pedrotti E, Stevan G, Montali M, Morselli S., Safety and efficacy of multiple cyclocoagulation of ciliary bodies by high-intensity focused ultrasound in patients with glaucoma. Graefes Arch Clin Exp Ophthalmol. 2017	Y	1
14	10.1111/aos.13445	Ten Berge JCEM, van Dijk EHC, Schreurs MWJ, Vermeer J, Boon CJF, Rothova A., Antiretinal antibodies in central serous chorioretinopathy: prevalence and clinical implications. Acta Ophthalmol. 2018	Y	1
15	10.1007/s10072-016-2785-5	Kang H, Kim SK, Park KJ, Choi NC, Kwon OY, Lim BH., Hemianopic line bisection error in a patient with Alzheimer's disease. Neurol Sci. 2017	Y	1
16	10.1212/WNL.0000000000004312	Hennes EM, Baumann M, Schanda K, Anlar B, Bajer-Kornek B, Blaschek A, Brantner-Inthaler S, Diepold K, Eisenkölbl A, Gotwald T, Kuchukhidze G, Gruber-Sedlmayr U, Häusler M, Höftberger R, Karenfort M, Klein A, Koch J, Kraus V, Lechner C, Leiz S, Leypoldt F, Mader S, et al., Prognostic relevance of MOG antibodies in children with an acquired demyelinating syndrome. Neurology. 2017	N	0
17	10.1016/j.oftal.2016.08.006	Pareja-Ríos A, Bonaque-González S, Serrano-García M, Cabrera-López F, Abreu-Reyes P, Marrero-Saavedra MD., Tele-ophthalmology for diabetic retinopathy screening: 8 years of experience. Arch Soc Esp Oftalmol. 2017	N	0
18	10.1007/s00417-016-3530-8	Mikhail M, El-Rayes EN, Kojima K, Ajlan R, Rezende F., Catheter-guided suprachoroidal buckling of rhegmatogenous retinal detachments secondary to peripheral retinal breaks. Graefes Arch Clin Exp Ophthalmol. 2017	Y	1
19	10.1007/s00417-017-3616-y	Shah MA, Agrawal R, Teoh R, Shah SM, Patel K, Gupta S, Gosai S., Pediatric ocular trauma score as a prognostic tool in the management of pediatric traumatic cataracts. Graefes Arch Clin Exp Ophthalmol. 2017	Y	1
20	10.1016/j.jfo.2016.09.014	Zaarour K, Slim E, Antoun J, Waked N., Thick keratoconic cornea associated with posterior polymorphous corneal dystrophy. J Fr Ophtalmol. 2017	N	0
21	10.1097/IAE.0000000000001311	Shifera AS, Pennesi ME, Yang P, Lin P., ULTRA-WIDE-FIELD FUNDUS AUTOFLUORESCENCE FINDINGS IN PATIENTS WITH ACUTE ZONAL OCCULT OUTER RETINOPATHY. Retina. 2017	N	0
22	10.1080/13816810.2017.1354384	Bryant L, Lozynska O, Han G, Morgan JIW, Gai X, Maguire AM, Aleman T, Bennett J., On variants and disease-causing mutations: Case studies of a SEMA4A variant identified in inherited blindness. Ophthalmic Genet. 2018	Y	1
23	10.1097/IAE.0000000000001391	Cheung CMG, Yanagi Y, Mohla A, Lee SY, Mathur R, Chan CM, Yeo I, Wong TY., CHARACTERIZATION AND DIFFERENTIATION OF POLYPOIDAL CHOROIDAL VASCULOPATHY USING SWEPT SOURCE OPTICAL COHERENCE TOMOGRAPHY ANGIOGRAPHY. Retina. 2017	N	0
24	10.1016/j.jcjo.2016.08.003	Lassalle S, Maschi C, Caujolle JP, Giordanengo V, Hofman P., Inverted conjunctival papilloma: a certainly underestimated high-risk lesion for carcinomatous transformation-a case report. Can J Ophthalmol. 2017	Y	1
25	10.2217/epi-2017-0060	Piras IS, Mills G, Llaci L, Naymik M, Ramsey K, Belnap N, Balak CD, Jepsen WM, Szelinger S, Siniard AL, Lewis CR, LaFleur M, Richholt RF, De Both MD, Avela K, Rangasamy S, Craig DW, Narayanan V, Järvelä I, Huentelman MJ, Schrauwen I., Exploring genome-wide DNA methylation patterns in Aicardi syndrome. Epigenomics. 2017	N	0
26	10.1097/IJG.0000000000000551	Perez CI, Mellado F, Jones A, Colvin R., Trabeculectomy Combined With Collagen Matrix Implant (Ologen). J Glaucoma. 2017	Y	1
27	10.1016/j.jcjo.2016.07.015	De Oliveira PR, Berger AR, Chow DR., Optical coherence tomography angiography in chorioretinal disorders. Can J Ophthalmol. 2017	Y	1
28	10.1016/j.jneuroim.2017.07.006	Yoshikura N, Kimura A, Hayashi Y, Inuzuka T., Anti-C1q autoantibodies in patients with neuromyelitis optica spectrum disorders. J Neuroimmunol. 2017	Y	1
29	10.1097/SCS.0000000000003431	Na J, Choi SY, Baek S, Lee H., Hemorrhage and Infarction of the Conjunctiva and Orbit in Essential Thrombocythemia. J Craniofac Surg. 2017	N	0
30	10.1097/ICB.0000000000000374	Despréaux R, Mrejen S, Quentel G, Cohen SY., EN FACE OPTICAL COHERENCE TOMOGRAPHY (OCT) AND OCT ANGIOGRAPHY FINDINGS IN RETINAL ASTROCYTIC HAMARTOMAS. Retin Cases Brief Rep. 2017	N	0
31	10.1136/bjophthalmol-2016-309996	Dagi LR, MacKinnon S, Zurakowski D, Prabhu SP., Rectus muscle excyclorotation and V-pattern strabismus: a quantitative appraisal of clinical relevance in syndromic craniosynostosis. Br J Ophthalmol. 2017	N	0
32	10.1097/IAE.0000000000001351	Medina CA, Ortiz AG, Relhan N, Smiddy WE, Townsend JH, Flynn HW Jr., MACULAR HOLE AFTER PARS PLANA VITRECTOMY FOR RHEGMATOGENOUS RETINAL DETACHMENT. Retina. 2017	N	0
33	10.1080/09286586.2016.1257027	Malkin AG, Goldstein JE, Massof RW., Multivariable Regression Model of the EuroQol 5-Dimension Questionnaire in Patients Seeking Outpatient Low Vision Rehabilitation. Ophthalmic Epidemiol. 2017	N	0
34	10.1007/s00018-017-2643-5	Kudo A., Introductory review: periostin-gene and protein structure. Cell Mol Life Sci. 2017	Y	1
35	10.1080/02713683.2017.1344712	Wang T, Zhu L, Peng Y, Shen N, Yu Y, Yao M, Zhu J., Photochemical Cross-Linking for Penetrating Corneal Wound Closure in Enucleated Porcine Eyes. Curr Eye Res. 2017	Y	1
36	10.1093/brain/awx219	Gerber S, Charif M, Chevrollier A, Chaumette T, Angebault C, Kane MS, Paris A, Alban J, Quiles M, Delettre C, Bonneau D, Procaccio V, Amati-Bonneau P, Reynier P, Leruez S, Calmon R, Boddaert N, Funalot B, Rio M, Bouccara D, Meunier I, Sesaki H, et al., Mutations in DNM1L, as in OPA1, result indominant optic atrophy despite opposite effectson mitochondrial fusion and fission. Brain. 2017	Y	1
37	10.1097/IAE.0000000000001683	Cheng YC, Shen JH, Chao AN, Chen KJ., Later Development of Posterior Staphyloma in Choroidal Osteoma With Choroidal Neovascularization. Retina. 2017	N	0
38	10.2174/1567202614666161104115440	Shimazawa M, Inoue Y, Masuda T, Onodera R, Tahara K, Shimizu Y, Mibe Y, Tsuruma K, Takeuchi H, Hara H., Topical Diclofenac-Loaded Liposomes Ameliorate Laser-Induced Choroidal Neovascularization in Mice and Non-Human Primates. Curr Neurovasc Res. 2017	N	0
39	10.1007/s00405-016-4308-7	Ozsutcu M, Balci O, Tanriverdi C, Demirci G., Efficacy of adjunctive mitomycin C in transcanalicular diode laser dacryocystorhinostomy. Eur Arch Otorhinolaryngol. 2017	N	0
40	10.1136/bjophthalmol-2016-309775	Aixinjueluo W, Usui T, Miyai T, Toyono T, Sakisaka T, Yamagami S., Accelerated transepithelial corneal cross-linking for progressive keratoconus: a prospective study of 12 months. Br J Ophthalmol. 2017	Y	1
41	10.1016/j.ijporl.2016.11.027	Yin T, van der Meer G., Neonatal airway obstruction in bilateral congenital dacryocystocoele: Case report and review of the literature. Int J Pediatr Otorhinolaryngol. 2017	Y	1
42	10.1007/s00417-017-3860-1	Chan JCW, Choy BNK, Chan OCC, Li KKW., Early intraocular pressure change after peripheral iridotomy with ultralow fluence pattern scanning laser and Nd:YAG laser in primary angle-closure suspect: Kowloon East Pattern Scanning Laser Study Report No. 3. Graefes Arch Clin Exp Ophthalmol. 2018	Y	1
43	10.1136/bjophthalmol-2016-309245	Sharma S, Ang M, Najjar RP, Sng C, Cheung CY, Rukmini AV, Schmetterer L, Milea D., Optical coherence tomography angiography in acute non-arteritic anterior ischaemic optic neuropathy. Br J Ophthalmol. 2017	Y	1
44	10.1080/01676830.2017.1279664	Medel R, Balaguer Solé Ò, Vasquez LM., Inferior tarsal muscle-conjunctivectomy for reverse ptosis repair: A novel technique. Orbit. 2017	Y	1
45	10.1038/eye.2017.25	Betts T, Ahmed S, Maguire S, Watts P., Characteristics of non-vitreoretinal ocular injury in child maltreatment: a systematic review. Eye (Lond). 2017	Y	1
46	10.1007/s10792-016-0261-0	Altunel O, Duru N, Goktas A, Ozkose A, Goktas E, Atas M., Evaluation of foveal photoreceptor layer in eyes with macular edema associated with branch retinal vein occlusion after ozurdex treatment. Int Ophthalmol. 2017	Y	1
47	10.1159/000478705	Motohashi R, Noma H, Yasuda K, Kotake O, Goto H, Shimura M., Dynamics of Inflammatory Factors in Aqueous Humor during Ranibizumab or Aflibercept Treatment for Age-Related Macular Degeneration. Ophthalmic Res. 2017	N	0
48	10.1016/j.jns.2017.01.033	Kang S, Shaikh AG., Acquired pendular nystagmus. J Neurol Sci. 2017	Y	1
49	10.1097/WNO.0000000000000503	Sadaka A, Schockman SL, Golnik KC., Evaluation of Horner Syndrome in the MRI Era. J Neuroophthalmol. 2017	N	0
50	10.1136/bjophthalmol-2016-310105	Jirawison C, Liu Y, Surasit K, Maningding E, Kamphaengkham S, Ausayakhun S, Heiden D, Margolis TP, Gonzales JA, Acharya NR, Keenan JD., Fundus findings in a series of patients with extrapulmonary tuberculosis in Thailand. Br J Ophthalmol. 2017	y	1
51	10.1016/j.neuroimage.2016.12.053	Pelland M, Orban P, Dansereau C, Lepore F, Bellec P, Collignon O., State-dependent modulation of functional connectivity in early blind individuals. Neuroimage. 2017	y	1
52	10.1097/ICO.0000000000001130	Zhang X, Bitar M, Davis RM., Spontaneous Canalicular Plug Erosion After Punctal Plug Placement. Cornea. 2017	N	0
53	10.3928/23258160-20171030-04	Stephens JD, Adam MK, Todorich B, Faia LJ, Garg S, Dunn JP, Mehta S., Optical Coherence Tomography Findings in Endogenous Fungal Chorioretinitis, Retinitis, and Endophthalmitis. Ophthalmic Surg Lasers Imaging Retina. 2017	N	0
54	10.1097/ICL.0000000000000297	Hashemi H, Rastad H, Emamian MH, Fotouhi A., Floppy Eyelid Syndrome and Its Determinants in Iranian Adults: A Population-Based Study. Eye Contact Lens. 2017	N	0
55	10.1177/2165079916686592	Lurati AR., Identifying Personal Risk Factors for Falls in the Workplace. Workplace Health Saf. 2017	y	1
56	10.1016/j.ad.2016.07.006	Miura T, Ohtsuka M, Yamamoto T., Sweet's syndrome-like eruption in association with the exacerbation of Behçet's disease after the Great East Japan Earthquake. Actas Dermosifiliogr. 2017	y	1
57	10.1001/jamaophthalmol.2017.1009	Borkar DS, Homayounfar G, Tham VM, Ray KJ, Vinoya AC, Uchida A, Acharya NR., Association Between Thyroid Disease and Uveitis: Results From the Pacific Ocular Inflammation Study. JAMA Ophthalmol. 2017	y	1
58	10.1111/opo.12332	Li SM, Kang MT, Wu SS, Meng B, Sun YY, Wei SF, Liu L, Peng X, Chen Z, Zhang F, Wang N., Studies using concentric ring bifocal and peripheral add multifocal contact lenses to slow myopia progression in school-aged children: a meta-analysis. Ophthalmic Physiol Opt. 2017	y	1
59	10.1097/IAE.0000000000001666	Hwang CK, Kolomeyer AM, Brucker AJ, Morgan JIW, Nichols CW, Aleman TS., Localized Bilateral Juxtafoveal Photoreceptor Loss in POEMS: A New Association. Retina. 2017	y	1
60	10.1159/000473701	Daien V, Le Pape A, Heve D, Villain M, Bremond Gignac D; Collaborators of the Epidemiology and Safety Program (EPISAFE).., Incidence and Characteristics of Congenital Cataract Surgery in France from 2010 to 2012: The EPISAFE Program. Ophthalmic Res. 2017	N	0
61	10.2337/db16-1364	Simó R, Hernández C., GLP-1R as a Target for the Treatment of Diabetic Retinopathy: Friend or Foe? Diabetes. 2017	Y	1
62	10.1016/j.ajo.2016.11.009	Ares WJ, Tonetti D, Yu JY, Monaco EA, Flickinger JC, Lunsford LD., Gamma Knife Radiosurgery for Uveal Metastases: Report of Three Cases and a Review of the Literature. Am J Ophthalmol. 2017	Y	1
63	10.1007/s40618-017-0608-z	Bartalena L, Veronesi G, Krassas GE, Wiersinga WM, Marcocci C, Marinò M, Salvi M, Daumerie C, Bournaud C, Stahl M, Sassi L, Azzolini C, Boboridis KG, Mourits MP, Soeters MR, Baldeschi L, Nardi M, Currò N, Boschi A, Bernard M, von Arx G, Perros P, et al., Does early response to intravenous glucocorticoids predict the final outcome in patients with moderate-to-severe and active Graves' orbitopathy?…	N	0
64	10.1016/j.jneuroim.2017.08.003	Palterer B, Brugnolo F, Sieni E, Barilaro A, Parronchi P., Neuromyelitis optica, atypical hemophagocytic lymphohistiocytosis and heterozygous perforin A91V mutation. J Neuroimmunol. 2017	Y	1
65	10.1111/ped.13149	Demircioğlu Kılıc B, Akbalık Kara M, Ozcelik AA, Ustunsoy H, Balat A., Brachial artery pseudoaneurysm: Rare finding in childhood Behcet's disease. Pediatr Int. 2017	Y	1
66	10.3233/JAD-161190	Shellington EM, Heath M, Gill DP, Petrella RJ., Long-Term Maintenance of Executive-Related Oculomotor Improvements in Older Adults with Self-Reported Cognitive Complaints Following a 24-Week Multiple Modality Exercise Program. J Alzheimers Dis. 2017	N	0
67	10.1055/s-0043-100116	Li J, Cai Y, Sun X, Yao D, Xia J., MiR-346 and TRAb as Predicative Factors for Relapse in Graves' Disease Within One Year. Horm Metab Res. 2017	Y	1
68	10.1097/ICO.0000000000001100	Farooq AV., Herpes Simplex Virus Keratitis and Resistance to Acyclovir. Cornea. 2017	Y	1
69	10.1080/02713683.2017.1341534	Modrzejewska M, Wiącek MP., A Novel Approach to the Differentiation of Intrabulbar Tumors in Color Doppler Imaging. Curr Eye Res. 2017	Y	1
70	10.1080/02713683.2017.1358373	Yamada Y, Suzuma K, Onizuka N, Uematsu M, Mohamed YH, Kitaoka T., Evaluation of retinal blood flow before and after panretinal photocoagulation using pattern scan laser for diabetic retinopathy. Curr Eye Res. 2017	Y	1
71	10.1097/IOP.0000000000000723	Chisholm SAM, Couch SM, Custer PL., Etiology and Management of Allergic Eyelid Dermatitis. Ophthal Plast Reconstr Surg. 2017	N	0
72	10.1016/j.expneurol.2016.08.004	Eapen BC, Murphy DP, Cifu DX., Neuroprosthetics in amputee and brain injury rehabilitation. Exp Neurol. 2017	y	1
73	10.1136/bjophthalmol-2016-309460	Bhardwaj M, Sen S, Chosdol K, Sharma A, Pushker N, Kashyap S, Bakhshi S, Bajaj MS., miRNA-200c and miRNA-141 as potential prognostic biomarkers and regulators of epithelial-mesenchymal transition in eyelid sebaceous gland carcinoma. Br J Ophthalmol. 2017	y	1
74	10.1136/jnnp-2017-315782	Evoli A, Alboini PE, Iorio R, Damato V, Bartoccioni E., Pattern of ocular involvement in myasthenia gravis with MuSK antibodies. J Neurol Neurosurg Psychiatry. 2017	y	1
75	10.3928/01913913-20170309-01	Rajavi Z, Feizi M, Behradfar N, Yaseri M, Sayanjali S, Motevaseli T, Sabbaghi H, Faghihi M., Inferior Oblique Overaction: Anterior Transposition Versus Myectomy. J Pediatr Ophthalmol Strabismus. 2017	N	0
76	10.1080/02713683.2016.1223317	Jia Y, Hu DN, Sun J, Zhou J., Correlations Between MMPs and TIMPs Levels in Aqueous Humor from High Myopia and Cataract Patients. Curr Eye Res. 2017	Y	1
77	10.1097/IOP.0000000000000536	Cole SC, Eftekhari K, Oberg T, Mamalis N, Anderson RL., Osteolytic Sarcoidosis of the Orbital Roof Masquerading as a Malignant Orbital Lesion. Ophthal Plast Reconstr Surg. 2017	N	0
78	10.1111/desc.12379	Hadad BS, Maurer D, Lewis TL., The role of early visual input in the development of contour interpolation: the case of subjective contours. Dev Sci. 2017	Y	1
79	10.3109/13816810.2016.1164192	Topçu V, Alp MY, Alp CK, Bakır A, Geylan D, Yılmazoğlu MÖ., A new familial case of Jalili syndrome caused by a novel mutation in CNNM4. Ophthalmic Genet. 2017	Y	1
80	10.1016/j.ophtha.2017.07.010	Pflugfelder SC, de Paiva CS., The Pathophysiology of Dry Eye Disease: What We Know and Future Directions for Research. Ophthalmology. 2017	Y	1
81	10.14670/HH-11-820	Kimura A, Namekata K, Guo X, Harada C, Harada T., Dock3-NMDA receptor interaction as a target for glaucoma therapy. Histol Histopathol. 2017	N	0
82	10.1016/j.oftal.2016.03.021	Cañizares B, Yago I, Piñero Á, Ruiz M., Unilateral persistent fetal vasculature coexisting with anterior segment dysgenesia. Arch Soc Esp Oftalmol. 2017	N	0
83	10.1136/jmedgenet-2016-104212	Gerber S, Ding MG, Gérard X, Zwicker K, Zanlonghi X, Rio M, Serre V, Hanein S, Munnich A, Rotig A, Bianchi L, Amati-Bonneau P, Elpeleg O, Kaplan J, Brandt U, Rozet JM., Compound heterozygosity for severe and hypomorphic NDUFS2 mutations cause non-syndromic LHON-like optic neuropathy. J Med Genet. 2017	Y	1
84	10.1093/hmg/ddx168	Whitman MC, Engle EC., Ocular congenital cranial dysinnervation disorders (CCDDs): insights into axon growth and guidance. Hum Mol Genet. 2017	Y	1
85	10.1016/j.ophtha.2017.01.027	Wu Z, Saunders LJ, Daga FB, Diniz-Filho A, Medeiros FA., Frequency of Testing to Detect Visual Field Progression Derived Using a Longitudinal Cohort of Glaucoma Patients. Ophthalmology. 2017	Y	1
86	10.1038/eye.2017.34	Midena E, Pilotto E., Microperimetry in age: related macular degeneration. Eye (Lond). 2017	Y	1
87	10.1097/IOP.0000000000000806	Hirabayashi KE, Kalin-Hajdu E, Brodie FL, Kersten RC, Russell MS, Vagefi MR., Retrobulbar Injection of Amphotericin B for Orbital Mucormycosis. Ophthal Plast Reconstr Surg. 2017	N	0
88	10.1097/ICU.0000000000000456	Sozeri Y, Salim S., Anticlotting agents and the surgical management of glaucoma. Curr Opin Ophthalmol. 2018	N	0
89	10.1097/IAE.0000000000001368	Yong Huang X, Wu N, Li N, Wang Y, Shakoor A., Diagnostic and Therapeutic Challenges. Retina. 2017	N	0
90	10.1007/s12031-016-0869-6	D'Amico AG, Maugeri G, Bucolo C, Saccone S, Federico C, Cavallaro S, D'Agata V., Nap Interferes with Hypoxia-Inducible Factors and VEGF Expression in Retina of Diabetic Rats. J Mol Neurosci. 2017	Y	1
91	10.1097/ICO.0000000000001129	Nakagawa H, Hattori T, Koike N, Ehara T, Narimatsu A, Kumakura S, Matsumoto T, Goto H., Number of Bacteria and Time of Coincubation With Bacteria Required for the Development of Acanthamoeba Keratitis. Cornea. 2017	N	0
92	10.1097/IAE.0000000000001408	Pertl L, Haas A, Hausberger S, Pichler T, Rabensteiner DF, Seidel G, Malle EM, Weger M., CHANGE OF CHOROIDAL VOLUME IN UNTREATED CENTRAL SEROUS CHORIORETINOPATHY. Retina. 2017	N	0
93	10.1002/dmrr.2860	Omori Y, Yanagisawa K, Sato A, Uchigata Y., The importance of nonstop treatment after delivery for pregnant women with type 2 diabetes. Diabetes Metab Res Rev. 2017	Y	1
94	10.1016/j.anai.2017.01.027	Bork K, Brehler R, Witzke G, Boor S, Heineke W, Hardt J., Blindness, tetraspasticity, and other signs of irreversible brain damage in hereditary angioedema. Ann Allergy Asthma Immunol. 2017	Y	1
95	10.1007/s10067-016-3417-4	Vitale A, Emmi G, Lopalco G, Gentileschi S, Silvestri E, Fabiani C, Urban ML, Frediani B, Galeazzi M, Iannone F, Rigante D, Cantarini L., Adalimumab effectiveness in Behçet's disease: short and long-term data from a multicenter retrospective observational study. Clin Rheumatol. 2017	N	0
96	10.1038/nprot.2017.032	Lückoff A, Scholz R, Sennlaub F, Xu H, Langmann T., Comprehensive analysis of mouse retinal mononuclear phagocytes. Nat Protoc. 2017	Y	1
97	10.1097/ICO.0000000000001038	Micali A, Roszkowska AM, Postorino EI, Rania L, Aragona E, Wylegala E, Nowinska A, Ieni A, Calimeri S, Pisani A, Aragona P, Puzzolo D., Comparative Confocal and Histopathological Study of Corneal Changes in Multiple Myeloma. Cornea. 2017	N	0
98	10.1097/ICU.0000000000000385	Daya SM., Conjunctival-limbal autograft. Curr Opin Ophthalmol. 2017	N	0
99	10.1007/s10384-016-0490-9	Shalaby U., Diltiazem co treatment with cyclosporine for induction of disease remission in sight-threatening non-infectious intraocular inflammation. Jpn J Ophthalmol. 2017	N	0
100	10.1016/j.ajo.2016.12.023	Tavares Ferreira J, Proença R, Alves M, Dias-Santos A, Santos BO, Cunha JP, Papoila AL, Abegão Pinto L., Retina and Choroid of Diabetic Patients Without Observed Retinal Vascular Changes: A Longitudinal Study. Am J Ophthalmol. 2017	Y	1
101	10.1016/j.jcjo.2016.07.026	Eom Y, Song JS, Kim HM., Spectacle plane add power of multifocal intraocular lenses according to effective lens position. Can J Ophthalmol. 2017	Y	1
102	10.1097/IAE.0000000000001401	Tye A, Klufas MA, McCannel CA, McCannel TA., Intracameral Air in Phacovitrectomy for Maintaining Intraocular Lens Position. Retina. 2017	N	0
103	10.1111/aos.13385	Jacobsen AG, Brost B, Vorum H, Hargitai J., Functional benefits and patient satisfaction with upper blepharoplasty - evaluated by objective and subjective outcome measures. Acta Ophthalmol. 2017	Y	1
104	10.1136/bjophthalmol-2016-309504	Himori N, Kunikata H, Kawasaki R, Shiga Y, Omodaka K, Takahashi H, Miyata T, Nakazawa T., The association between skin autofluorescence and mean deviation in patients with open-angle glaucoma. Br J Ophthalmol. 2017	Y	1
105	10.1007/s00417-017-3696-8	Callizo J, Pfeiffer S, Lahme E, van Oterendorp C, Khattab M, Bemme S, Kulanga M, Hoerauf H, Feltgen N., Risk of progression in macula-on rhegmatogenous retinal detachment. Graefes Arch Clin Exp Ophthalmol. 2017	Y	1
106	10.1111/cup.12909	Motaparthi K., Pseudoherpetic transient acantholytic dermatosis (Grover disease): case series and review of the literature. J Cutan Pathol. 2017	Y	1
107	10.1097/IOP.0000000000000837	Charles NC, Jakobiec FA, Patel P., Periorbital Dermoid Cyst With Unique Trichilemmal Differentiation. Ophthal Plast Reconstr Surg. 2017	N	0
108	10.1080/09286586.2016.1255763	Sasongko MB, Agni AN, Wardhana FS, Kotha SP, Gupta P, Widayanti TW, Supanji, Widyaputri F, Widyaningrum R, Wong TY, Kawasaki R, Wang JJ, Pawiroranu S., Rationale and Methodology for a Community-Based Study of Diabetic Retinopathy in an Indonesian Population with Type 2 Diabetes Mellitus: The Jogjakarta Eye Diabetic Study in the Community. Ophthalmic Epidemiol. 2017	Y	1
109	10.1111/jnc.14070	Bordone MP, González Fleitas MF, Pasquini LA, Bosco A, Sande PH, Rosenstein RE, Dorfman D., Involvement of microglia in early axoglial alterations of the optic nerve induced by experimental glaucoma. J Neurochem. 2017	Y	1
110	10.1016/j.ajpath.2017.08.025	Kumar S, Nakashizuka H, Jones A, Lambert A, Zhao X, Shen M, Parker M, Wang S, Berriochoa Z, Fnu A, VanBeuge S, Chévez-Barrios P, Tso M, Rainier J, Fu Y., Proteolytic Degradation and Inflammation Play Critical Roles in Polypoidal Choroidal Vasculopathy. Am J Pathol. 2017	Y	1
111	10.1017/S0031182017000270	Chen SJ, Zhang YX, Huang SG, Lu FL., Galectins expressed differently in genetically susceptible C57BL/6 and resistant BALB/c mice during acute ocular Toxoplasma gondii infection. Parasitology. 2017	Y	1
112	10.1111/aos.13226	Wirth MA, Freiberg F, Pfau M, Wons J, Becker MD, Michels S., Optical coherence tomography angiography in age-related macular degeneration: persistence of vascular network in quiescent choroidal neovascularization. Acta Ophthalmol. 2017	Y	1
113	10.1136/bjophthalmol-2015-307837	Dhalla K, Cousens S, Murdoch IE., Phacoemulsification compared with phacotrabeculectomy surgery: a within-person observational cohort study. Br J Ophthalmol. 2017	Y	1
114	10.3171/2016.12.SPINE16540	Ibrahim TF, Sweis RT, Nockels RP., Reversible postoperative blindness caused by bilateral status epilepticus amauroticus following thoracolumbar deformity correction: case report. J Neurosurg Spine. 2017	Y	1
115	10.1097/ICO.0000000000001263	Oliva-Biénzobas V, Navas A, C Astiazarán M, Chacón-Camacho OF, A Bermúdez-Magner J, Takane M, Graue-Hernández E, Zenteno JC., CYP1B1 Cytopathy: Uncommon Phenotype of a Homozygous CYP1B1 Deletion as Internal Corneal Ulcer of Von Hippel. Cornea. 2017	N	0
				71

## Sheet: China
ID Number (please do not modify)	Digital Object Identifier (DOI)	Reference	Access to Full text (Y/N)	Column 0/1
1	10.1016/j.neulet.2016.12.057	Azuchi Y, Kimura A, Guo X, Akiyama G, Noro T, Harada C, Nishigaki A, Namekata K, Harada T., Valproic acid and ASK1 deficiency ameliorate optic neuritis and neurodegeneration in an animal model of multiple sclerosis. Neurosci Lett. 2017	Y	1
2	10.1111/cge.12895	Kletke S, Batmanabane V, Dai T, Vincent A, Li S, Gordon KA, Papsin BC, Cushing SL, Héon E., The combination of vestibular impairment and congenital sensorineural hearing loss predisposes patients to ocular anomalies, including Usher syndrome. Clin Genet. 2017	Y	1
3	10.1097/DSS.0000000000000787	Martínez-Palmer A, Calsina-Prat M, Ormaechea N, Toll A., Reconstruction of Combined Upper and Lower Eyelid Defects in a Patient With Lentigo Maligna. Dermatol Surg. 2017	Y	1
4	10.1093/brain/awx236	Niturad CE, Lev D, Kalscheuer VM, Charzewska A, Schubert J, Lerman-Sagie T, Kroes HY, Oegema R, Traverso M, Specchio N, Lassota M, Chelly J, Bennett-Back O, Carmi N, Koffler-Brill T, Iacomino M, Trivisano M, Capovilla G, Striano P, Nawara M, Rzonca S, Fischer U, et al., Rare GABRA3 variants are associated with epileptic seizures, encephalopathy and dysmorphic features. Brain. 2017	Y	1
5	10.1080/13816810.2016.1188124	Tyagi P, Juma Z, Reddy AR., Retinal features in Mulvihill-Smith syndrome. Ophthalmic Genet. 2017	Y	1
6	10.1097/WNO.0000000000000455	Mendes Marques NBPS, Barros SR, Miranda AF, Nobre Cardoso J, Parreira S, Fonseca T, Donaire NM, Campos N., Horizontal Gaze Palsy and Progressive Scoliosis With ROBO 3 Mutations in Patients From Cape Verde. J Neuroophthalmol. 2017	Y	1
7	10.1080/09286586.2017.1313992	Oye J, Mactaggart I, Polack S, Schmidt E, Tamo V, Okwen M, Kuper H., Prevalence and Causes of Visual Impairment in Fundong District, North West Cameroon: Results of a Population-Based Survey. Ophthalmic Epidemiol. 2017	Y	1
8	10.1016/j.clae.2017.01.003	Gifford K, Gifford P, Hendicott PL, Schmid KL., Near binocular visual function in young adult orthokeratology versus soft contact lens wearers. Cont Lens Anterior Eye. 2017	Y	1
9	10.2217/bmm-2017-0218	Wostyn P, De Deyn PP., Intracranial pressure-induced optic nerve sheath response as a predictive biomarker for optic disc edema in astronauts. Biomark Med. 2017	Y	1
10	10.1097/WNO.0000000000000555	Morrow MJ, Ko MW., Should Oral Corticosteroids Be Used to Treat Demyelinating Optic Neuritis? J Neuroophthalmol. 2017	Y	1
11	10.1080/09273972.2017.1349816	Morad Y, Pras E, Nemet A., Superior and Lateral Rectus Myopexy for Acquired Adult Distance Esotropia: A "One Size Fits All" Surgery. Strabismus. 2017	Y	1
12	10.1097/IOP.0000000000000731	Repp DJ, Rubinstein TJ, Herreid PA, Sires BS., Biomechanics of the Levator Aponeurosis. Ophthal Plast Reconstr Surg. 2017	Y	1
13	10.1007/s00417-017-3817-4	De Gregorio A, Pedrotti E, Stevan G, Montali M, Morselli S., Safety and efficacy of multiple cyclocoagulation of ciliary bodies by high-intensity focused ultrasound in patients with glaucoma. Graefes Arch Clin Exp Ophthalmol. 2017	N	0
14	10.1111/aos.13445	Ten Berge JCEM, van Dijk EHC, Schreurs MWJ, Vermeer J, Boon CJF, Rothova A., Antiretinal antibodies in central serous chorioretinopathy: prevalence and clinical implications. Acta Ophthalmol. 2018	Y	1
15	10.1007/s10072-016-2785-5	Kang H, Kim SK, Park KJ, Choi NC, Kwon OY, Lim BH., Hemianopic line bisection error in a patient with Alzheimer's disease. Neurol Sci. 2017	N	0
16	10.1212/WNL.0000000000004312	Hennes EM, Baumann M, Schanda K, Anlar B, Bajer-Kornek B, Blaschek A, Brantner-Inthaler S, Diepold K, Eisenkölbl A, Gotwald T, Kuchukhidze G, Gruber-Sedlmayr U, Häusler M, Höftberger R, Karenfort M, Klein A, Koch J, Kraus V, Lechner C, Leiz S, Leypoldt F, Mader S, et al., Prognostic relevance of MOG antibodies in children with an acquired demyelinating syndrome. Neurology. 2017	N	0
17	10.1016/j.oftal.2016.08.006	Pareja-Ríos A, Bonaque-González S, Serrano-García M, Cabrera-López F, Abreu-Reyes P, Marrero-Saavedra MD., Tele-ophthalmology for diabetic retinopathy screening: 8 years of experience. Arch Soc Esp Oftalmol. 2017	N	0
18	10.1007/s00417-016-3530-8	Mikhail M, El-Rayes EN, Kojima K, Ajlan R, Rezende F., Catheter-guided suprachoroidal buckling of rhegmatogenous retinal detachments secondary to peripheral retinal breaks. Graefes Arch Clin Exp Ophthalmol. 2017	N	0
19	10.1007/s00417-017-3616-y	Shah MA, Agrawal R, Teoh R, Shah SM, Patel K, Gupta S, Gosai S., Pediatric ocular trauma score as a prognostic tool in the management of pediatric traumatic cataracts. Graefes Arch Clin Exp Ophthalmol. 2017	N	0
20	10.1016/j.jfo.2016.09.014	Zaarour K, Slim E, Antoun J, Waked N., Thick keratoconic cornea associated with posterior polymorphous corneal dystrophy. J Fr Ophtalmol. 2017	N	0
21	10.1097/IAE.0000000000001311	Shifera AS, Pennesi ME, Yang P, Lin P., ULTRA-WIDE-FIELD FUNDUS AUTOFLUORESCENCE FINDINGS IN PATIENTS WITH ACUTE ZONAL OCCULT OUTER RETINOPATHY. Retina. 2017	N	0
22	10.1080/13816810.2017.1354384	Bryant L, Lozynska O, Han G, Morgan JIW, Gai X, Maguire AM, Aleman T, Bennett J., On variants and disease-causing mutations: Case studies of a SEMA4A variant identified in inherited blindness. Ophthalmic Genet. 2018	Y	1
23	10.1097/IAE.0000000000001391	Cheung CMG, Yanagi Y, Mohla A, Lee SY, Mathur R, Chan CM, Yeo I, Wong TY., CHARACTERIZATION AND DIFFERENTIATION OF POLYPOIDAL CHOROIDAL VASCULOPATHY USING SWEPT SOURCE OPTICAL COHERENCE TOMOGRAPHY ANGIOGRAPHY. Retina. 2017	N	0
24	10.1016/j.jcjo.2016.08.003	Lassalle S, Maschi C, Caujolle JP, Giordanengo V, Hofman P., Inverted conjunctival papilloma: a certainly underestimated high-risk lesion for carcinomatous transformation-a case report. Can J Ophthalmol. 2017	Y	1
25	10.2217/epi-2017-0060	Piras IS, Mills G, Llaci L, Naymik M, Ramsey K, Belnap N, Balak CD, Jepsen WM, Szelinger S, Siniard AL, Lewis CR, LaFleur M, Richholt RF, De Both MD, Avela K, Rangasamy S, Craig DW, Narayanan V, Järvelä I, Huentelman MJ, Schrauwen I., Exploring genome-wide DNA methylation patterns in Aicardi syndrome. Epigenomics. 2017	Y	1
26	10.1097/IJG.0000000000000551	Perez CI, Mellado F, Jones A, Colvin R., Trabeculectomy Combined With Collagen Matrix Implant (Ologen). J Glaucoma. 2017	Y	1
27	10.1016/j.jcjo.2016.07.015	De Oliveira PR, Berger AR, Chow DR., Optical coherence tomography angiography in chorioretinal disorders. Can J Ophthalmol. 2017	Y	1
28	10.1016/j.jneuroim.2017.07.006	Yoshikura N, Kimura A, Hayashi Y, Inuzuka T., Anti-C1q autoantibodies in patients with neuromyelitis optica spectrum disorders. J Neuroimmunol. 2017	Y	1
29	10.1097/SCS.0000000000003431	Na J, Choi SY, Baek S, Lee H., Hemorrhage and Infarction of the Conjunctiva and Orbit in Essential Thrombocythemia. J Craniofac Surg. 2017	Y	1
30	10.1097/ICB.0000000000000374	Despréaux R, Mrejen S, Quentel G, Cohen SY., EN FACE OPTICAL COHERENCE TOMOGRAPHY (OCT) AND OCT ANGIOGRAPHY FINDINGS IN RETINAL ASTROCYTIC HAMARTOMAS. Retin Cases Brief Rep. 2017	Y	1
31	10.1136/bjophthalmol-2016-309996	Dagi LR, MacKinnon S, Zurakowski D, Prabhu SP., Rectus muscle excyclorotation and V-pattern strabismus: a quantitative appraisal of clinical relevance in syndromic craniosynostosis. Br J Ophthalmol. 2017	Y	1
32	10.1097/IAE.0000000000001351	Medina CA, Ortiz AG, Relhan N, Smiddy WE, Townsend JH, Flynn HW Jr., MACULAR HOLE AFTER PARS PLANA VITRECTOMY FOR RHEGMATOGENOUS RETINAL DETACHMENT. Retina. 2017	Y	1
33	10.1080/09286586.2016.1257027	Malkin AG, Goldstein JE, Massof RW., Multivariable Regression Model of the EuroQol 5-Dimension Questionnaire in Patients Seeking Outpatient Low Vision Rehabilitation. Ophthalmic Epidemiol. 2017	Y	1
34	10.1007/s00018-017-2643-5	Kudo A., Introductory review: periostin-gene and protein structure. Cell Mol Life Sci. 2017	N	0
35	10.1080/02713683.2017.1344712	Wang T, Zhu L, Peng Y, Shen N, Yu Y, Yao M, Zhu J., Photochemical Cross-Linking for Penetrating Corneal Wound Closure in Enucleated Porcine Eyes. Curr Eye Res. 2017	Y	1
36	10.1093/brain/awx219	Gerber S, Charif M, Chevrollier A, Chaumette T, Angebault C, Kane MS, Paris A, Alban J, Quiles M, Delettre C, Bonneau D, Procaccio V, Amati-Bonneau P, Reynier P, Leruez S, Calmon R, Boddaert N, Funalot B, Rio M, Bouccara D, Meunier I, Sesaki H, et al., Mutations in DNM1L, as in OPA1, result indominant optic atrophy despite opposite effectson mitochondrial fusion and fission. Brain. 2017	Y	1
37	10.1097/IAE.0000000000001683	Cheng YC, Shen JH, Chao AN, Chen KJ., Later Development of Posterior Staphyloma in Choroidal Osteoma With Choroidal Neovascularization. Retina. 2017	Y	1
38	10.2174/1567202614666161104115440	Shimazawa M, Inoue Y, Masuda T, Onodera R, Tahara K, Shimizu Y, Mibe Y, Tsuruma K, Takeuchi H, Hara H., Topical Diclofenac-Loaded Liposomes Ameliorate Laser-Induced Choroidal Neovascularization in Mice and Non-Human Primates. Curr Neurovasc Res. 2017	N	0
39	10.1007/s00405-016-4308-7	Ozsutcu M, Balci O, Tanriverdi C, Demirci G., Efficacy of adjunctive mitomycin C in transcanalicular diode laser dacryocystorhinostomy. Eur Arch Otorhinolaryngol. 2017	N	0
40	10.1136/bjophthalmol-2016-309775	Aixinjueluo W, Usui T, Miyai T, Toyono T, Sakisaka T, Yamagami S., Accelerated transepithelial corneal cross-linking for progressive keratoconus: a prospective study of 12 months. Br J Ophthalmol. 2017	Y	1
41	10.1016/j.ijporl.2016.11.027	Yin T, van der Meer G., Neonatal airway obstruction in bilateral congenital dacryocystocoele: Case report and review of the literature. Int J Pediatr Otorhinolaryngol. 2017	Y	1
42	10.1007/s00417-017-3860-1	Chan JCW, Choy BNK, Chan OCC, Li KKW., Early intraocular pressure change after peripheral iridotomy with ultralow fluence pattern scanning laser and Nd:YAG laser in primary angle-closure suspect: Kowloon East Pattern Scanning Laser Study Report No. 3. Graefes Arch Clin Exp Ophthalmol. 2018	N	0
43	10.1136/bjophthalmol-2016-309245	Sharma S, Ang M, Najjar RP, Sng C, Cheung CY, Rukmini AV, Schmetterer L, Milea D., Optical coherence tomography angiography in acute non-arteritic anterior ischaemic optic neuropathy. Br J Ophthalmol. 2017	Y	1
44	10.1080/01676830.2017.1279664	Medel R, Balaguer Solé Ò, Vasquez LM., Inferior tarsal muscle-conjunctivectomy for reverse ptosis repair: A novel technique. Orbit. 2017	Y	1
45	10.1038/eye.2017.25	Betts T, Ahmed S, Maguire S, Watts P., Characteristics of non-vitreoretinal ocular injury in child maltreatment: a systematic review. Eye (Lond). 2017	Y	1
46	10.1007/s10792-016-0261-0	Altunel O, Duru N, Goktas A, Ozkose A, Goktas E, Atas M., Evaluation of foveal photoreceptor layer in eyes with macular edema associated with branch retinal vein occlusion after ozurdex treatment. Int Ophthalmol. 2017	N	0
47	10.1159/000478705	Motohashi R, Noma H, Yasuda K, Kotake O, Goto H, Shimura M., Dynamics of Inflammatory Factors in Aqueous Humor during Ranibizumab or Aflibercept Treatment for Age-Related Macular Degeneration. Ophthalmic Res. 2017	Y	1
48	10.1016/j.jns.2017.01.033	Kang S, Shaikh AG., Acquired pendular nystagmus. J Neurol Sci. 2017	Y	1
49	10.1097/WNO.0000000000000503	Sadaka A, Schockman SL, Golnik KC., Evaluation of Horner Syndrome in the MRI Era. J Neuroophthalmol. 2017	Y	1
50	10.1136/bjophthalmol-2016-310105	Jirawison C, Liu Y, Surasit K, Maningding E, Kamphaengkham S, Ausayakhun S, Heiden D, Margolis TP, Gonzales JA, Acharya NR, Keenan JD., Fundus findings in a series of patients with extrapulmonary tuberculosis in Thailand. Br J Ophthalmol. 2017	Y	1
51	10.1016/j.neuroimage.2016.12.053	Pelland M, Orban P, Dansereau C, Lepore F, Bellec P, Collignon O., State-dependent modulation of functional connectivity in early blind individuals. Neuroimage. 2017	Y	1
52	10.1097/ICO.0000000000001130	Zhang X, Bitar M, Davis RM., Spontaneous Canalicular Plug Erosion After Punctal Plug Placement. Cornea. 2017	Y	1
53	10.3928/23258160-20171030-04	Stephens JD, Adam MK, Todorich B, Faia LJ, Garg S, Dunn JP, Mehta S., Optical Coherence Tomography Findings in Endogenous Fungal Chorioretinitis, Retinitis, and Endophthalmitis. Ophthalmic Surg Lasers Imaging Retina. 2017	N	0
54	10.1097/ICL.0000000000000297	Hashemi H, Rastad H, Emamian MH, Fotouhi A., Floppy Eyelid Syndrome and Its Determinants in Iranian Adults: A Population-Based Study. Eye Contact Lens. 2017	Y	1
55	10.1177/2165079916686592	Lurati AR., Identifying Personal Risk Factors for Falls in the Workplace. Workplace Health Saf. 2017	Y	1
56	10.1016/j.ad.2016.07.006	Miura T, Ohtsuka M, Yamamoto T., Sweet's syndrome-like eruption in association with the exacerbation of Behçet's disease after the Great East Japan Earthquake. Actas Dermosifiliogr. 2017	N	0
57	10.1001/jamaophthalmol.2017.1009	Borkar DS, Homayounfar G, Tham VM, Ray KJ, Vinoya AC, Uchida A, Acharya NR., Association Between Thyroid Disease and Uveitis: Results From the Pacific Ocular Inflammation Study. JAMA Ophthalmol. 2017	Y	1
58	10.1111/opo.12332	Li SM, Kang MT, Wu SS, Meng B, Sun YY, Wei SF, Liu L, Peng X, Chen Z, Zhang F, Wang N., Studies using concentric ring bifocal and peripheral add multifocal contact lenses to slow myopia progression in school-aged children: a meta-analysis. Ophthalmic Physiol Opt. 2017	Y	1
59	10.1097/IAE.0000000000001666	Hwang CK, Kolomeyer AM, Brucker AJ, Morgan JIW, Nichols CW, Aleman TS., Localized Bilateral Juxtafoveal Photoreceptor Loss in POEMS: A New Association. Retina. 2017	Y	1
60	10.1159/000473701	Daien V, Le Pape A, Heve D, Villain M, Bremond Gignac D; Collaborators of the Epidemiology and Safety Program (EPISAFE).., Incidence and Characteristics of Congenital Cataract Surgery in France from 2010 to 2012: The EPISAFE Program. Ophthalmic Res. 2017	Y	1
61	10.2337/db16-1364	Simó R, Hernández C., GLP-1R as a Target for the Treatment of Diabetic Retinopathy: Friend or Foe? Diabetes. 2017	Y	1
62	10.1016/j.ajo.2016.11.009	Ares WJ, Tonetti D, Yu JY, Monaco EA, Flickinger JC, Lunsford LD., Gamma Knife Radiosurgery for Uveal Metastases: Report of Three Cases and a Review of the Literature. Am J Ophthalmol. 2017	Y	1
63	10.1007/s40618-017-0608-z	Bartalena L, Veronesi G, Krassas GE, Wiersinga WM, Marcocci C, Marinò M, Salvi M, Daumerie C, Bournaud C, Stahl M, Sassi L, Azzolini C, Boboridis KG, Mourits MP, Soeters MR, Baldeschi L, Nardi M, Currò N, Boschi A, Bernard M, von Arx G, Perros P, et al., Does early response to intravenous glucocorticoids predict the final outcome in patients with moderate-to-severe and active Graves' orbitopathy?…	N	0
64	10.1016/j.jneuroim.2017.08.003	Palterer B, Brugnolo F, Sieni E, Barilaro A, Parronchi P., Neuromyelitis optica, atypical hemophagocytic lymphohistiocytosis and heterozygous perforin A91V mutation. J Neuroimmunol. 2017	Y	1
65	10.1111/ped.13149	Demircioğlu Kılıc B, Akbalık Kara M, Ozcelik AA, Ustunsoy H, Balat A., Brachial artery pseudoaneurysm: Rare finding in childhood Behcet's disease. Pediatr Int. 2017	Y	1
66	10.3233/JAD-161190	Shellington EM, Heath M, Gill DP, Petrella RJ., Long-Term Maintenance of Executive-Related Oculomotor Improvements in Older Adults with Self-Reported Cognitive Complaints Following a 24-Week Multiple Modality Exercise Program. J Alzheimers Dis. 2017	Y	1
67	10.1055/s-0043-100116	Li J, Cai Y, Sun X, Yao D, Xia J., MiR-346 and TRAb as Predicative Factors for Relapse in Graves' Disease Within One Year. Horm Metab Res. 2017	N	0
68	10.1097/ICO.0000000000001100	Farooq AV., Herpes Simplex Virus Keratitis and Resistance to Acyclovir. Cornea. 2017	Y	1
69	10.1080/02713683.2017.1341534	Modrzejewska M, Wiącek MP., A Novel Approach to the Differentiation of Intrabulbar Tumors in Color Doppler Imaging. Curr Eye Res. 2017	Y	1
70	10.1080/02713683.2017.1358373	Yamada Y, Suzuma K, Onizuka N, Uematsu M, Mohamed YH, Kitaoka T., Evaluation of retinal blood flow before and after panretinal photocoagulation using pattern scan laser for diabetic retinopathy. Curr Eye Res. 2017	Y	1
71	10.1097/IOP.0000000000000723	Chisholm SAM, Couch SM, Custer PL., Etiology and Management of Allergic Eyelid Dermatitis. Ophthal Plast Reconstr Surg. 2017	Y	1
72	10.1016/j.expneurol.2016.08.004	Eapen BC, Murphy DP, Cifu DX., Neuroprosthetics in amputee and brain injury rehabilitation. Exp Neurol. 2017	Y	1
73	10.1136/bjophthalmol-2016-309460	Bhardwaj M, Sen S, Chosdol K, Sharma A, Pushker N, Kashyap S, Bakhshi S, Bajaj MS., miRNA-200c and miRNA-141 as potential prognostic biomarkers and regulators of epithelial-mesenchymal transition in eyelid sebaceous gland carcinoma. Br J Ophthalmol. 2017	Y	1
74	10.1136/jnnp-2017-315782	Evoli A, Alboini PE, Iorio R, Damato V, Bartoccioni E., Pattern of ocular involvement in myasthenia gravis with MuSK antibodies. J Neurol Neurosurg Psychiatry. 2017	Y	1
75	10.3928/01913913-20170309-01	Rajavi Z, Feizi M, Behradfar N, Yaseri M, Sayanjali S, Motevaseli T, Sabbaghi H, Faghihi M., Inferior Oblique Overaction: Anterior Transposition Versus Myectomy. J Pediatr Ophthalmol Strabismus. 2017	N	0
76	10.1080/02713683.2016.1223317	Jia Y, Hu DN, Sun J, Zhou J., Correlations Between MMPs and TIMPs Levels in Aqueous Humor from High Myopia and Cataract Patients. Curr Eye Res. 2017	Y	1
77	10.1097/IOP.0000000000000536	Cole SC, Eftekhari K, Oberg T, Mamalis N, Anderson RL., Osteolytic Sarcoidosis of the Orbital Roof Masquerading as a Malignant Orbital Lesion. Ophthal Plast Reconstr Surg. 2017	Y	1
78	10.1111/desc.12379	Hadad BS, Maurer D, Lewis TL., The role of early visual input in the development of contour interpolation: the case of subjective contours. Dev Sci. 2017	Y	1
79	10.3109/13816810.2016.1164192	Topçu V, Alp MY, Alp CK, Bakır A, Geylan D, Yılmazoğlu MÖ., A new familial case of Jalili syndrome caused by a novel mutation in CNNM4. Ophthalmic Genet. 2017	Y	1
80	10.1016/j.ophtha.2017.07.010	Pflugfelder SC, de Paiva CS., The Pathophysiology of Dry Eye Disease: What We Know and Future Directions for Research. Ophthalmology. 2017	Y	1
81	10.14670/HH-11-820	Kimura A, Namekata K, Guo X, Harada C, Harada T., Dock3-NMDA receptor interaction as a target for glaucoma therapy. Histol Histopathol. 2017	N	0
82	10.1016/j.oftal.2016.03.021	Cañizares B, Yago I, Piñero Á, Ruiz M., Unilateral persistent fetal vasculature coexisting with anterior segment dysgenesia. Arch Soc Esp Oftalmol. 2017	N	0
83	10.1136/jmedgenet-2016-104212	Gerber S, Ding MG, Gérard X, Zwicker K, Zanlonghi X, Rio M, Serre V, Hanein S, Munnich A, Rotig A, Bianchi L, Amati-Bonneau P, Elpeleg O, Kaplan J, Brandt U, Rozet JM., Compound heterozygosity for severe and hypomorphic NDUFS2 mutations cause non-syndromic LHON-like optic neuropathy. J Med Genet. 2017	Y	1
84	10.1093/hmg/ddx168	Whitman MC, Engle EC., Ocular congenital cranial dysinnervation disorders (CCDDs): insights into axon growth and guidance. Hum Mol Genet. 2017	Y	1
85	10.1016/j.ophtha.2017.01.027	Wu Z, Saunders LJ, Daga FB, Diniz-Filho A, Medeiros FA., Frequency of Testing to Detect Visual Field Progression Derived Using a Longitudinal Cohort of Glaucoma Patients. Ophthalmology. 2017	Y	1
86	10.1038/eye.2017.34	Midena E, Pilotto E., Microperimetry in age: related macular degeneration. Eye (Lond). 2017	Y	1
87	10.1097/IOP.0000000000000806	Hirabayashi KE, Kalin-Hajdu E, Brodie FL, Kersten RC, Russell MS, Vagefi MR., Retrobulbar Injection of Amphotericin B for Orbital Mucormycosis. Ophthal Plast Reconstr Surg. 2017	Y	1
88	10.1097/ICU.0000000000000456	Sozeri Y, Salim S., Anticlotting agents and the surgical management of glaucoma. Curr Opin Ophthalmol. 2018	Y	1
89	10.1097/IAE.0000000000001368	Yong Huang X, Wu N, Li N, Wang Y, Shakoor A., Diagnostic and Therapeutic Challenges. Retina. 2017	Y	1
90	10.1007/s12031-016-0869-6	D'Amico AG, Maugeri G, Bucolo C, Saccone S, Federico C, Cavallaro S, D'Agata V., Nap Interferes with Hypoxia-Inducible Factors and VEGF Expression in Retina of Diabetic Rats. J Mol Neurosci. 2017	N	0
91	10.1097/ICO.0000000000001129	Nakagawa H, Hattori T, Koike N, Ehara T, Narimatsu A, Kumakura S, Matsumoto T, Goto H., Number of Bacteria and Time of Coincubation With Bacteria Required for the Development of Acanthamoeba Keratitis. Cornea. 2017	Y	1
92	10.1097/IAE.0000000000001408	Pertl L, Haas A, Hausberger S, Pichler T, Rabensteiner DF, Seidel G, Malle EM, Weger M., CHANGE OF CHOROIDAL VOLUME IN UNTREATED CENTRAL SEROUS CHORIORETINOPATHY. Retina. 2017	Y	1
93	10.1002/dmrr.2860	Omori Y, Yanagisawa K, Sato A, Uchigata Y., The importance of nonstop treatment after delivery for pregnant women with type 2 diabetes. Diabetes Metab Res Rev. 2017	Y	1
94	10.1016/j.anai.2017.01.027	Bork K, Brehler R, Witzke G, Boor S, Heineke W, Hardt J., Blindness, tetraspasticity, and other signs of irreversible brain damage in hereditary angioedema. Ann Allergy Asthma Immunol. 2017	Y	1
95	10.1007/s10067-016-3417-4	Vitale A, Emmi G, Lopalco G, Gentileschi S, Silvestri E, Fabiani C, Urban ML, Frediani B, Galeazzi M, Iannone F, Rigante D, Cantarini L., Adalimumab effectiveness in Behçet's disease: short and long-term data from a multicenter retrospective observational study. Clin Rheumatol. 2017	N	0
96	10.1038/nprot.2017.032	Lückoff A, Scholz R, Sennlaub F, Xu H, Langmann T., Comprehensive analysis of mouse retinal mononuclear phagocytes. Nat Protoc. 2017	N	0
97	10.1097/ICO.0000000000001038	Micali A, Roszkowska AM, Postorino EI, Rania L, Aragona E, Wylegala E, Nowinska A, Ieni A, Calimeri S, Pisani A, Aragona P, Puzzolo D., Comparative Confocal and Histopathological Study of Corneal Changes in Multiple Myeloma. Cornea. 2017	Y	1
98	10.1097/ICU.0000000000000385	Daya SM., Conjunctival-limbal autograft. Curr Opin Ophthalmol. 2017	Y	1
99	10.1007/s10384-016-0490-9	Shalaby U., Diltiazem co treatment with cyclosporine for induction of disease remission in sight-threatening non-infectious intraocular inflammation. Jpn J Ophthalmol. 2017	N	0
100	10.1016/j.ajo.2016.12.023	Tavares Ferreira J, Proença R, Alves M, Dias-Santos A, Santos BO, Cunha JP, Papoila AL, Abegão Pinto L., Retina and Choroid of Diabetic Patients Without Observed Retinal Vascular Changes: A Longitudinal Study. Am J Ophthalmol. 2017	Y	1
101	10.1016/j.jcjo.2016.07.026	Eom Y, Song JS, Kim HM., Spectacle plane add power of multifocal intraocular lenses according to effective lens position. Can J Ophthalmol. 2017	Y	1
102	10.1097/IAE.0000000000001401	Tye A, Klufas MA, McCannel CA, McCannel TA., Intracameral Air in Phacovitrectomy for Maintaining Intraocular Lens Position. Retina. 2017	Y	1
103	10.1111/aos.13385	Jacobsen AG, Brost B, Vorum H, Hargitai J., Functional benefits and patient satisfaction with upper blepharoplasty - evaluated by objective and subjective outcome measures. Acta Ophthalmol. 2017	Y	1
104	10.1136/bjophthalmol-2016-309504	Himori N, Kunikata H, Kawasaki R, Shiga Y, Omodaka K, Takahashi H, Miyata T, Nakazawa T., The association between skin autofluorescence and mean deviation in patients with open-angle glaucoma. Br J Ophthalmol. 2017	Y	1
105	10.1007/s00417-017-3696-8	Callizo J, Pfeiffer S, Lahme E, van Oterendorp C, Khattab M, Bemme S, Kulanga M, Hoerauf H, Feltgen N., Risk of progression in macula-on rhegmatogenous retinal detachment. Graefes Arch Clin Exp Ophthalmol. 2017	N	0
106	10.1111/cup.12909	Motaparthi K., Pseudoherpetic transient acantholytic dermatosis (Grover disease): case series and review of the literature. J Cutan Pathol. 2017	Y	1
107	10.1097/IOP.0000000000000837	Charles NC, Jakobiec FA, Patel P., Periorbital Dermoid Cyst With Unique Trichilemmal Differentiation. Ophthal Plast Reconstr Surg. 2017	Y	1
108	10.1080/09286586.2016.1255763	Sasongko MB, Agni AN, Wardhana FS, Kotha SP, Gupta P, Widayanti TW, Supanji, Widyaputri F, Widyaningrum R, Wong TY, Kawasaki R, Wang JJ, Pawiroranu S., Rationale and Methodology for a Community-Based Study of Diabetic Retinopathy in an Indonesian Population with Type 2 Diabetes Mellitus: The Jogjakarta Eye Diabetic Study in the Community. Ophthalmic Epidemiol. 2017	Y	1
109	10.1111/jnc.14070	Bordone MP, González Fleitas MF, Pasquini LA, Bosco A, Sande PH, Rosenstein RE, Dorfman D., Involvement of microglia in early axoglial alterations of the optic nerve induced by experimental glaucoma. J Neurochem. 2017	Y	1
110	10.1016/j.ajpath.2017.08.025	Kumar S, Nakashizuka H, Jones A, Lambert A, Zhao X, Shen M, Parker M, Wang S, Berriochoa Z, Fnu A, VanBeuge S, Chévez-Barrios P, Tso M, Rainier J, Fu Y., Proteolytic Degradation and Inflammation Play Critical Roles in Polypoidal Choroidal Vasculopathy. Am J Pathol. 2017	Y	1
111	10.1017/S0031182017000270	Chen SJ, Zhang YX, Huang SG, Lu FL., Galectins expressed differently in genetically susceptible C57BL/6 and resistant BALB/c mice during acute ocular Toxoplasma gondii infection. Parasitology. 2017	N	0
112	10.1111/aos.13226	Wirth MA, Freiberg F, Pfau M, Wons J, Becker MD, Michels S., Optical coherence tomography angiography in age-related macular degeneration: persistence of vascular network in quiescent choroidal neovascularization. Acta Ophthalmol. 2017	Y	1
113	10.1136/bjophthalmol-2015-307837	Dhalla K, Cousens S, Murdoch IE., Phacoemulsification compared with phacotrabeculectomy surgery: a within-person observational cohort study. Br J Ophthalmol. 2017	Y	1
114	10.3171/2016.12.SPINE16540	Ibrahim TF, Sweis RT, Nockels RP., Reversible postoperative blindness caused by bilateral status epilepticus amauroticus following thoracolumbar deformity correction: case report. J Neurosurg Spine. 2017	Y	1
115	10.1097/ICO.0000000000001263	Oliva-Biénzobas V, Navas A, C Astiazarán M, Chacón-Camacho OF, A Bermúdez-Magner J, Takane M, Graue-Hernández E, Zenteno JC., CYP1B1 Cytopathy: Uncommon Phenotype of a Homozygous CYP1B1 Deletion as Internal Corneal Ulcer of Von Hippel. Cornea. 2017	Y	1
				88

## Sheet: Cuba
ID Number (please do not modify)	Digital Object Identifier (DOI)	Reference	Access to Full text (Y/N)	Column 0/1
1	10.1016/j.neulet.2016.12.057	Azuchi Y, Kimura A, Guo X, Akiyama G, Noro T, Harada C, Nishigaki A, Namekata K, Harada T., Valproic acid and ASK1 deficiency ameliorate optic neuritis and neurodegeneration in an animal model of multiple sclerosis. Neurosci Lett. 2017	N	0
2	10.1111/cge.12895	Kletke S, Batmanabane V, Dai T, Vincent A, Li S, Gordon KA, Papsin BC, Cushing SL, Héon E., The combination of vestibular impairment and congenital sensorineural hearing loss predisposes patients to ocular anomalies, including Usher syndrome. Clin Genet. 2017	N	0
3	10.1097/DSS.0000000000000787	Martínez-Palmer A, Calsina-Prat M, Ormaechea N, Toll A., Reconstruction of Combined Upper and Lower Eyelid Defects in a Patient With Lentigo Maligna. Dermatol Surg. 2017	N	0
4	10.1093/brain/awx236	Niturad CE, Lev D, Kalscheuer VM, Charzewska A, Schubert J, Lerman-Sagie T, Kroes HY, Oegema R, Traverso M, Specchio N, Lassota M, Chelly J, Bennett-Back O, Carmi N, Koffler-Brill T, Iacomino M, Trivisano M, Capovilla G, Striano P, Nawara M, Rzonca S, Fischer U, et al., Rare GABRA3 variants are associated with epileptic seizures, encephalopathy and dysmorphic features. Brain. 2017	N	0
5	10.1080/13816810.2016.1188124	Tyagi P, Juma Z, Reddy AR., Retinal features in Mulvihill-Smith syndrome. Ophthalmic Genet. 2017	N	0
6	10.1097/WNO.0000000000000455	Mendes Marques NBPS, Barros SR, Miranda AF, Nobre Cardoso J, Parreira S, Fonseca T, Donaire NM, Campos N., Horizontal Gaze Palsy and Progressive Scoliosis With ROBO 3 Mutations in Patients From Cape Verde. J Neuroophthalmol. 2017	N	0
7	10.1080/09286586.2017.1313992	Oye J, Mactaggart I, Polack S, Schmidt E, Tamo V, Okwen M, Kuper H., Prevalence and Causes of Visual Impairment in Fundong District, North West Cameroon: Results of a Population-Based Survey. Ophthalmic Epidemiol. 2017	N	0
8	10.1016/j.clae.2017.01.003	Gifford K, Gifford P, Hendicott PL, Schmid KL., Near binocular visual function in young adult orthokeratology versus soft contact lens wearers. Cont Lens Anterior Eye. 2017	N	0
9	10.2217/bmm-2017-0218	Wostyn P, De Deyn PP., Intracranial pressure-induced optic nerve sheath response as a predictive biomarker for optic disc edema in astronauts. Biomark Med. 2017	N	0
10	10.1097/WNO.0000000000000555	Morrow MJ, Ko MW., Should Oral Corticosteroids Be Used to Treat Demyelinating Optic Neuritis? J Neuroophthalmol. 2017	N	0
11	10.1080/09273972.2017.1349816	Morad Y, Pras E, Nemet A., Superior and Lateral Rectus Myopexy for Acquired Adult Distance Esotropia: A "One Size Fits All" Surgery. Strabismus. 2017	N	0
12	10.1097/IOP.0000000000000731	Repp DJ, Rubinstein TJ, Herreid PA, Sires BS., Biomechanics of the Levator Aponeurosis. Ophthal Plast Reconstr Surg. 2017	N	0
13	10.1007/s00417-017-3817-4	De Gregorio A, Pedrotti E, Stevan G, Montali M, Morselli S., Safety and efficacy of multiple cyclocoagulation of ciliary bodies by high-intensity focused ultrasound in patients with glaucoma. Graefes Arch Clin Exp Ophthalmol. 2017	Y	1
14	10.1111/aos.13445	Ten Berge JCEM, van Dijk EHC, Schreurs MWJ, Vermeer J, Boon CJF, Rothova A., Antiretinal antibodies in central serous chorioretinopathy: prevalence and clinical implications. Acta Ophthalmol. 2018	N	0
15	10.1007/s10072-016-2785-5	Kang H, Kim SK, Park KJ, Choi NC, Kwon OY, Lim BH., Hemianopic line bisection error in a patient with Alzheimer's disease. Neurol Sci. 2017	Y	1
16	10.1212/WNL.0000000000004312	Hennes EM, Baumann M, Schanda K, Anlar B, Bajer-Kornek B, Blaschek A, Brantner-Inthaler S, Diepold K, Eisenkölbl A, Gotwald T, Kuchukhidze G, Gruber-Sedlmayr U, Häusler M, Höftberger R, Karenfort M, Klein A, Koch J, Kraus V, Lechner C, Leiz S, Leypoldt F, Mader S, et al., Prognostic relevance of MOG antibodies in children with an acquired demyelinating syndrome. Neurology. 2017	N	0
17	10.1016/j.oftal.2016.08.006	Pareja-Ríos A, Bonaque-González S, Serrano-García M, Cabrera-López F, Abreu-Reyes P, Marrero-Saavedra MD., Tele-ophthalmology for diabetic retinopathy screening: 8 years of experience. Arch Soc Esp Oftalmol. 2017	N	0
18	10.1007/s00417-016-3530-8	Mikhail M, El-Rayes EN, Kojima K, Ajlan R, Rezende F., Catheter-guided suprachoroidal buckling of rhegmatogenous retinal detachments secondary to peripheral retinal breaks. Graefes Arch Clin Exp Ophthalmol. 2017	Y	1
19	10.1007/s00417-017-3616-y	Shah MA, Agrawal R, Teoh R, Shah SM, Patel K, Gupta S, Gosai S., Pediatric ocular trauma score as a prognostic tool in the management of pediatric traumatic cataracts. Graefes Arch Clin Exp Ophthalmol. 2017	Y	1
20	10.1016/j.jfo.2016.09.014	Zaarour K, Slim E, Antoun J, Waked N., Thick keratoconic cornea associated with posterior polymorphous corneal dystrophy. J Fr Ophtalmol. 2017	N	0
21	10.1097/IAE.0000000000001311	Shifera AS, Pennesi ME, Yang P, Lin P., ULTRA-WIDE-FIELD FUNDUS AUTOFLUORESCENCE FINDINGS IN PATIENTS WITH ACUTE ZONAL OCCULT OUTER RETINOPATHY. Retina. 2017	N	0
22	10.1080/13816810.2017.1354384	Bryant L, Lozynska O, Han G, Morgan JIW, Gai X, Maguire AM, Aleman T, Bennett J., On variants and disease-causing mutations: Case studies of a SEMA4A variant identified in inherited blindness. Ophthalmic Genet. 2018	N	0
23	10.1097/IAE.0000000000001391	Cheung CMG, Yanagi Y, Mohla A, Lee SY, Mathur R, Chan CM, Yeo I, Wong TY., CHARACTERIZATION AND DIFFERENTIATION OF POLYPOIDAL CHOROIDAL VASCULOPATHY USING SWEPT SOURCE OPTICAL COHERENCE TOMOGRAPHY ANGIOGRAPHY. Retina. 2017	N	0
24	10.1016/j.jcjo.2016.08.003	Lassalle S, Maschi C, Caujolle JP, Giordanengo V, Hofman P., Inverted conjunctival papilloma: a certainly underestimated high-risk lesion for carcinomatous transformation-a case report. Can J Ophthalmol. 2017	N	0
25	10.2217/epi-2017-0060	Piras IS, Mills G, Llaci L, Naymik M, Ramsey K, Belnap N, Balak CD, Jepsen WM, Szelinger S, Siniard AL, Lewis CR, LaFleur M, Richholt RF, De Both MD, Avela K, Rangasamy S, Craig DW, Narayanan V, Järvelä I, Huentelman MJ, Schrauwen I., Exploring genome-wide DNA methylation patterns in Aicardi syndrome. Epigenomics. 2017	N	0
26	10.1097/IJG.0000000000000551	Perez CI, Mellado F, Jones A, Colvin R., Trabeculectomy Combined With Collagen Matrix Implant (Ologen). J Glaucoma. 2017	N	0
27	10.1016/j.jcjo.2016.07.015	De Oliveira PR, Berger AR, Chow DR., Optical coherence tomography angiography in chorioretinal disorders. Can J Ophthalmol. 2017	N	0
28	10.1016/j.jneuroim.2017.07.006	Yoshikura N, Kimura A, Hayashi Y, Inuzuka T., Anti-C1q autoantibodies in patients with neuromyelitis optica spectrum disorders. J Neuroimmunol. 2017	N	0
29	10.1097/SCS.0000000000003431	Na J, Choi SY, Baek S, Lee H., Hemorrhage and Infarction of the Conjunctiva and Orbit in Essential Thrombocythemia. J Craniofac Surg. 2017	N	0
30	10.1097/ICB.0000000000000374	Despréaux R, Mrejen S, Quentel G, Cohen SY., EN FACE OPTICAL COHERENCE TOMOGRAPHY (OCT) AND OCT ANGIOGRAPHY FINDINGS IN RETINAL ASTROCYTIC HAMARTOMAS. Retin Cases Brief Rep. 2017	N	0
31	10.1136/bjophthalmol-2016-309996	Dagi LR, MacKinnon S, Zurakowski D, Prabhu SP., Rectus muscle excyclorotation and V-pattern strabismus: a quantitative appraisal of clinical relevance in syndromic craniosynostosis. Br J Ophthalmol. 2017	N	0
32	10.1097/IAE.0000000000001351	Medina CA, Ortiz AG, Relhan N, Smiddy WE, Townsend JH, Flynn HW Jr., MACULAR HOLE AFTER PARS PLANA VITRECTOMY FOR RHEGMATOGENOUS RETINAL DETACHMENT. Retina. 2017	N	0
33	10.1080/09286586.2016.1257027	Malkin AG, Goldstein JE, Massof RW., Multivariable Regression Model of the EuroQol 5-Dimension Questionnaire in Patients Seeking Outpatient Low Vision Rehabilitation. Ophthalmic Epidemiol. 2017	N	0
34	10.1007/s00018-017-2643-5	Kudo A., Introductory review: periostin-gene and protein structure. Cell Mol Life Sci. 2017	Y	1
35	10.1080/02713683.2017.1344712	Wang T, Zhu L, Peng Y, Shen N, Yu Y, Yao M, Zhu J., Photochemical Cross-Linking for Penetrating Corneal Wound Closure in Enucleated Porcine Eyes. Curr Eye Res. 2017	N	0
36	10.1093/brain/awx219	Gerber S, Charif M, Chevrollier A, Chaumette T, Angebault C, Kane MS, Paris A, Alban J, Quiles M, Delettre C, Bonneau D, Procaccio V, Amati-Bonneau P, Reynier P, Leruez S, Calmon R, Boddaert N, Funalot B, Rio M, Bouccara D, Meunier I, Sesaki H, et al., Mutations in DNM1L, as in OPA1, result indominant optic atrophy despite opposite effectson mitochondrial fusion and fission. Brain. 2017	N	0
37	10.1097/IAE.0000000000001683	Cheng YC, Shen JH, Chao AN, Chen KJ., Later Development of Posterior Staphyloma in Choroidal Osteoma With Choroidal Neovascularization. Retina. 2017	N	0
38	10.2174/1567202614666161104115440	Shimazawa M, Inoue Y, Masuda T, Onodera R, Tahara K, Shimizu Y, Mibe Y, Tsuruma K, Takeuchi H, Hara H., Topical Diclofenac-Loaded Liposomes Ameliorate Laser-Induced Choroidal Neovascularization in Mice and Non-Human Primates. Curr Neurovasc Res. 2017	N	0
39	10.1007/s00405-016-4308-7	Ozsutcu M, Balci O, Tanriverdi C, Demirci G., Efficacy of adjunctive mitomycin C in transcanalicular diode laser dacryocystorhinostomy. Eur Arch Otorhinolaryngol. 2017	Y	1
40	10.1136/bjophthalmol-2016-309775	Aixinjueluo W, Usui T, Miyai T, Toyono T, Sakisaka T, Yamagami S., Accelerated transepithelial corneal cross-linking for progressive keratoconus: a prospective study of 12 months. Br J Ophthalmol. 2017	N	0
41	10.1016/j.ijporl.2016.11.027	Yin T, van der Meer G., Neonatal airway obstruction in bilateral congenital dacryocystocoele: Case report and review of the literature. Int J Pediatr Otorhinolaryngol. 2017	N	0
42	10.1007/s00417-017-3860-1	Chan JCW, Choy BNK, Chan OCC, Li KKW., Early intraocular pressure change after peripheral iridotomy with ultralow fluence pattern scanning laser and Nd:YAG laser in primary angle-closure suspect: Kowloon East Pattern Scanning Laser Study Report No. 3. Graefes Arch Clin Exp Ophthalmol. 2018	Y	1
43	10.1136/bjophthalmol-2016-309245	Sharma S, Ang M, Najjar RP, Sng C, Cheung CY, Rukmini AV, Schmetterer L, Milea D., Optical coherence tomography angiography in acute non-arteritic anterior ischaemic optic neuropathy. Br J Ophthalmol. 2017	N	0
44	10.1080/01676830.2017.1279664	Medel R, Balaguer Solé Ò, Vasquez LM., Inferior tarsal muscle-conjunctivectomy for reverse ptosis repair: A novel technique. Orbit. 2017	N	0
45	10.1038/eye.2017.25	Betts T, Ahmed S, Maguire S, Watts P., Characteristics of non-vitreoretinal ocular injury in child maltreatment: a systematic review. Eye (Lond). 2017	N	0
46	10.1007/s10792-016-0261-0	Altunel O, Duru N, Goktas A, Ozkose A, Goktas E, Atas M., Evaluation of foveal photoreceptor layer in eyes with macular edema associated with branch retinal vein occlusion after ozurdex treatment. Int Ophthalmol. 2017	Y	1
47	10.1159/000478705	Motohashi R, Noma H, Yasuda K, Kotake O, Goto H, Shimura M., Dynamics of Inflammatory Factors in Aqueous Humor during Ranibizumab or Aflibercept Treatment for Age-Related Macular Degeneration. Ophthalmic Res. 2017	N	0
48	10.1016/j.jns.2017.01.033	Kang S, Shaikh AG., Acquired pendular nystagmus. J Neurol Sci. 2017	N*	0
49	10.1097/WNO.0000000000000503	Sadaka A, Schockman SL, Golnik KC., Evaluation of Horner Syndrome in the MRI Era. J Neuroophthalmol. 2017	N	0
50	10.1136/bjophthalmol-2016-310105	Jirawison C, Liu Y, Surasit K, Maningding E, Kamphaengkham S, Ausayakhun S, Heiden D, Margolis TP, Gonzales JA, Acharya NR, Keenan JD., Fundus findings in a series of patients with extrapulmonary tuberculosis in Thailand. Br J Ophthalmol. 2017	N	0
51	10.1016/j.neuroimage.2016.12.053	Pelland M, Orban P, Dansereau C, Lepore F, Bellec P, Collignon O., State-dependent modulation of functional connectivity in early blind individuals. Neuroimage. 2017	N	0
52	10.1097/ICO.0000000000001130	Zhang X, Bitar M, Davis RM., Spontaneous Canalicular Plug Erosion After Punctal Plug Placement. Cornea. 2017	N	0
53	10.3928/23258160-20171030-04	Stephens JD, Adam MK, Todorich B, Faia LJ, Garg S, Dunn JP, Mehta S., Optical Coherence Tomography Findings in Endogenous Fungal Chorioretinitis, Retinitis, and Endophthalmitis. Ophthalmic Surg Lasers Imaging Retina. 2017	N	0
54	10.1097/ICL.0000000000000297	Hashemi H, Rastad H, Emamian MH, Fotouhi A., Floppy Eyelid Syndrome and Its Determinants in Iranian Adults: A Population-Based Study. Eye Contact Lens. 2017	N	0
55	10.1177/2165079916686592	Lurati AR., Identifying Personal Risk Factors for Falls in the Workplace. Workplace Health Saf. 2017	N	0
56	10.1016/j.ad.2016.07.006	Miura T, Ohtsuka M, Yamamoto T., Sweet's syndrome-like eruption in association with the exacerbation of Behçet's disease after the Great East Japan Earthquake. Actas Dermosifiliogr. 2017	N	0
57	10.1001/jamaophthalmol.2017.1009	Borkar DS, Homayounfar G, Tham VM, Ray KJ, Vinoya AC, Uchida A, Acharya NR., Association Between Thyroid Disease and Uveitis: Results From the Pacific Ocular Inflammation Study. JAMA Ophthalmol. 2017	N	0
58	10.1111/opo.12332	Li SM, Kang MT, Wu SS, Meng B, Sun YY, Wei SF, Liu L, Peng X, Chen Z, Zhang F, Wang N., Studies using concentric ring bifocal and peripheral add multifocal contact lenses to slow myopia progression in school-aged children: a meta-analysis. Ophthalmic Physiol Opt. 2017	N	0
59	10.1097/IAE.0000000000001666	Hwang CK, Kolomeyer AM, Brucker AJ, Morgan JIW, Nichols CW, Aleman TS., Localized Bilateral Juxtafoveal Photoreceptor Loss in POEMS: A New Association. Retina. 2017	N	0
60	10.1159/000473701	Daien V, Le Pape A, Heve D, Villain M, Bremond Gignac D; Collaborators of the Epidemiology and Safety Program (EPISAFE).., Incidence and Characteristics of Congenital Cataract Surgery in France from 2010 to 2012: The EPISAFE Program. Ophthalmic Res. 2017	N	0
61	10.2337/db16-1364	Simó R, Hernández C., GLP-1R as a Target for the Treatment of Diabetic Retinopathy: Friend or Foe? Diabetes. 2017	N	0
62	10.1016/j.ajo.2016.11.009	Ares WJ, Tonetti D, Yu JY, Monaco EA, Flickinger JC, Lunsford LD., Gamma Knife Radiosurgery for Uveal Metastases: Report of Three Cases and a Review of the Literature. Am J Ophthalmol. 2017	N	0
63	10.1007/s40618-017-0608-z	Bartalena L, Veronesi G, Krassas GE, Wiersinga WM, Marcocci C, Marinò M, Salvi M, Daumerie C, Bournaud C, Stahl M, Sassi L, Azzolini C, Boboridis KG, Mourits MP, Soeters MR, Baldeschi L, Nardi M, Currò N, Boschi A, Bernard M, von Arx G, Perros P, et al., Does early response to intravenous glucocorticoids predict the final outcome in patients with moderate-to-severe and active Graves' orbitopathy?…	Y	1
64	10.1016/j.jneuroim.2017.08.003	Palterer B, Brugnolo F, Sieni E, Barilaro A, Parronchi P., Neuromyelitis optica, atypical hemophagocytic lymphohistiocytosis and heterozygous perforin A91V mutation. J Neuroimmunol. 2017	N	0
65	10.1111/ped.13149	Demircioğlu Kılıc B, Akbalık Kara M, Ozcelik AA, Ustunsoy H, Balat A., Brachial artery pseudoaneurysm: Rare finding in childhood Behcet's disease. Pediatr Int. 2017	N	0
66	10.3233/JAD-161190	Shellington EM, Heath M, Gill DP, Petrella RJ., Long-Term Maintenance of Executive-Related Oculomotor Improvements in Older Adults with Self-Reported Cognitive Complaints Following a 24-Week Multiple Modality Exercise Program. J Alzheimers Dis. 2017	N	0
67	10.1055/s-0043-100116	Li J, Cai Y, Sun X, Yao D, Xia J., MiR-346 and TRAb as Predicative Factors for Relapse in Graves' Disease Within One Year. Horm Metab Res. 2017	N	0
68	10.1097/ICO.0000000000001100	Farooq AV., Herpes Simplex Virus Keratitis and Resistance to Acyclovir. Cornea. 2017	N	0
69	10.1080/02713683.2017.1341534	Modrzejewska M, Wiącek MP., A Novel Approach to the Differentiation of Intrabulbar Tumors in Color Doppler Imaging. Curr Eye Res. 2017	N	0
70	10.1080/02713683.2017.1358373	Yamada Y, Suzuma K, Onizuka N, Uematsu M, Mohamed YH, Kitaoka T., Evaluation of retinal blood flow before and after panretinal photocoagulation using pattern scan laser for diabetic retinopathy. Curr Eye Res. 2017	N	0
71	10.1097/IOP.0000000000000723	Chisholm SAM, Couch SM, Custer PL., Etiology and Management of Allergic Eyelid Dermatitis. Ophthal Plast Reconstr Surg. 2017	N	0
72	10.1016/j.expneurol.2016.08.004	Eapen BC, Murphy DP, Cifu DX., Neuroprosthetics in amputee and brain injury rehabilitation. Exp Neurol. 2017	N	0
73	10.1136/bjophthalmol-2016-309460	Bhardwaj M, Sen S, Chosdol K, Sharma A, Pushker N, Kashyap S, Bakhshi S, Bajaj MS., miRNA-200c and miRNA-141 as potential prognostic biomarkers and regulators of epithelial-mesenchymal transition in eyelid sebaceous gland carcinoma. Br J Ophthalmol. 2017	N	0
74	10.1136/jnnp-2017-315782	Evoli A, Alboini PE, Iorio R, Damato V, Bartoccioni E., Pattern of ocular involvement in myasthenia gravis with MuSK antibodies. J Neurol Neurosurg Psychiatry. 2017	N	0
75	10.3928/01913913-20170309-01	Rajavi Z, Feizi M, Behradfar N, Yaseri M, Sayanjali S, Motevaseli T, Sabbaghi H, Faghihi M., Inferior Oblique Overaction: Anterior Transposition Versus Myectomy. J Pediatr Ophthalmol Strabismus. 2017	N	0
76	10.1080/02713683.2016.1223317	Jia Y, Hu DN, Sun J, Zhou J., Correlations Between MMPs and TIMPs Levels in Aqueous Humor from High Myopia and Cataract Patients. Curr Eye Res. 2017	N	0
77	10.1097/IOP.0000000000000536	Cole SC, Eftekhari K, Oberg T, Mamalis N, Anderson RL., Osteolytic Sarcoidosis of the Orbital Roof Masquerading as a Malignant Orbital Lesion. Ophthal Plast Reconstr Surg. 2017	N	0
78	10.1111/desc.12379	Hadad BS, Maurer D, Lewis TL., The role of early visual input in the development of contour interpolation: the case of subjective contours. Dev Sci. 2017	N	0
79	10.3109/13816810.2016.1164192	Topçu V, Alp MY, Alp CK, Bakır A, Geylan D, Yılmazoğlu MÖ., A new familial case of Jalili syndrome caused by a novel mutation in CNNM4. Ophthalmic Genet. 2017	N	0
80	10.1016/j.ophtha.2017.07.010	Pflugfelder SC, de Paiva CS., The Pathophysiology of Dry Eye Disease: What We Know and Future Directions for Research. Ophthalmology. 2017	N	0
81	10.14670/HH-11-820	Kimura A, Namekata K, Guo X, Harada C, Harada T., Dock3-NMDA receptor interaction as a target for glaucoma therapy. Histol Histopathol. 2017	N	0
82	10.1016/j.oftal.2016.03.021	Cañizares B, Yago I, Piñero Á, Ruiz M., Unilateral persistent fetal vasculature coexisting with anterior segment dysgenesia. Arch Soc Esp Oftalmol. 2017	N	0
83	10.1136/jmedgenet-2016-104212	Gerber S, Ding MG, Gérard X, Zwicker K, Zanlonghi X, Rio M, Serre V, Hanein S, Munnich A, Rotig A, Bianchi L, Amati-Bonneau P, Elpeleg O, Kaplan J, Brandt U, Rozet JM., Compound heterozygosity for severe and hypomorphic NDUFS2 mutations cause non-syndromic LHON-like optic neuropathy. J Med Genet. 2017	N	0
84	10.1093/hmg/ddx168	Whitman MC, Engle EC., Ocular congenital cranial dysinnervation disorders (CCDDs): insights into axon growth and guidance. Hum Mol Genet. 2017	N	0
85	10.1016/j.ophtha.2017.01.027	Wu Z, Saunders LJ, Daga FB, Diniz-Filho A, Medeiros FA., Frequency of Testing to Detect Visual Field Progression Derived Using a Longitudinal Cohort of Glaucoma Patients. Ophthalmology. 2017	N	0
86	10.1038/eye.2017.34	Midena E, Pilotto E., Microperimetry in age: related macular degeneration. Eye (Lond). 2017	N	0
87	10.1097/IOP.0000000000000806	Hirabayashi KE, Kalin-Hajdu E, Brodie FL, Kersten RC, Russell MS, Vagefi MR., Retrobulbar Injection of Amphotericin B for Orbital Mucormycosis. Ophthal Plast Reconstr Surg. 2017	N	0
88	10.1097/ICU.0000000000000456	Sozeri Y, Salim S., Anticlotting agents and the surgical management of glaucoma. Curr Opin Ophthalmol. 2018	N	0
89	10.1097/IAE.0000000000001368	Yong Huang X, Wu N, Li N, Wang Y, Shakoor A., Diagnostic and Therapeutic Challenges. Retina. 2017	N	0
90	10.1007/s12031-016-0869-6	D'Amico AG, Maugeri G, Bucolo C, Saccone S, Federico C, Cavallaro S, D'Agata V., Nap Interferes with Hypoxia-Inducible Factors and VEGF Expression in Retina of Diabetic Rats. J Mol Neurosci. 2017	Y	1
91	10.1097/ICO.0000000000001129	Nakagawa H, Hattori T, Koike N, Ehara T, Narimatsu A, Kumakura S, Matsumoto T, Goto H., Number of Bacteria and Time of Coincubation With Bacteria Required for the Development of Acanthamoeba Keratitis. Cornea. 2017	N	0
92	10.1097/IAE.0000000000001408	Pertl L, Haas A, Hausberger S, Pichler T, Rabensteiner DF, Seidel G, Malle EM, Weger M., CHANGE OF CHOROIDAL VOLUME IN UNTREATED CENTRAL SEROUS CHORIORETINOPATHY. Retina. 2017	N	0
93	10.1002/dmrr.2860	Omori Y, Yanagisawa K, Sato A, Uchigata Y., The importance of nonstop treatment after delivery for pregnant women with type 2 diabetes. Diabetes Metab Res Rev. 2017	N	0
94	10.1016/j.anai.2017.01.027	Bork K, Brehler R, Witzke G, Boor S, Heineke W, Hardt J., Blindness, tetraspasticity, and other signs of irreversible brain damage in hereditary angioedema. Ann Allergy Asthma Immunol. 2017	N	0
95	10.1007/s10067-016-3417-4	Vitale A, Emmi G, Lopalco G, Gentileschi S, Silvestri E, Fabiani C, Urban ML, Frediani B, Galeazzi M, Iannone F, Rigante D, Cantarini L., Adalimumab effectiveness in Behçet's disease: short and long-term data from a multicenter retrospective observational study. Clin Rheumatol. 2017	Y	1
96	10.1038/nprot.2017.032	Lückoff A, Scholz R, Sennlaub F, Xu H, Langmann T., Comprehensive analysis of mouse retinal mononuclear phagocytes. Nat Protoc. 2017	N	0
97	10.1097/ICO.0000000000001038	Micali A, Roszkowska AM, Postorino EI, Rania L, Aragona E, Wylegala E, Nowinska A, Ieni A, Calimeri S, Pisani A, Aragona P, Puzzolo D., Comparative Confocal and Histopathological Study of Corneal Changes in Multiple Myeloma. Cornea. 2017	N	0
98	10.1097/ICU.0000000000000385	Daya SM., Conjunctival-limbal autograft. Curr Opin Ophthalmol. 2017	N	0
99	10.1007/s10384-016-0490-9	Shalaby U., Diltiazem co treatment with cyclosporine for induction of disease remission in sight-threatening non-infectious intraocular inflammation. Jpn J Ophthalmol. 2017	Y	1
100	10.1016/j.ajo.2016.12.023	Tavares Ferreira J, Proença R, Alves M, Dias-Santos A, Santos BO, Cunha JP, Papoila AL, Abegão Pinto L., Retina and Choroid of Diabetic Patients Without Observed Retinal Vascular Changes: A Longitudinal Study. Am J Ophthalmol. 2017	N	0
101	10.1016/j.jcjo.2016.07.026	Eom Y, Song JS, Kim HM., Spectacle plane add power of multifocal intraocular lenses according to effective lens position. Can J Ophthalmol. 2017	N	0
102	10.1097/IAE.0000000000001401	Tye A, Klufas MA, McCannel CA, McCannel TA., Intracameral Air in Phacovitrectomy for Maintaining Intraocular Lens Position. Retina. 2017	N	0
103	10.1111/aos.13385	Jacobsen AG, Brost B, Vorum H, Hargitai J., Functional benefits and patient satisfaction with upper blepharoplasty - evaluated by objective and subjective outcome measures. Acta Ophthalmol. 2017	N	0
104	10.1136/bjophthalmol-2016-309504	Himori N, Kunikata H, Kawasaki R, Shiga Y, Omodaka K, Takahashi H, Miyata T, Nakazawa T., The association between skin autofluorescence and mean deviation in patients with open-angle glaucoma. Br J Ophthalmol. 2017	N	0
105	10.1007/s00417-017-3696-8	Callizo J, Pfeiffer S, Lahme E, van Oterendorp C, Khattab M, Bemme S, Kulanga M, Hoerauf H, Feltgen N., Risk of progression in macula-on rhegmatogenous retinal detachment. Graefes Arch Clin Exp Ophthalmol. 2017	Y	1
106	10.1111/cup.12909	Motaparthi K., Pseudoherpetic transient acantholytic dermatosis (Grover disease): case series and review of the literature. J Cutan Pathol. 2017	N	0
107	10.1097/IOP.0000000000000837	Charles NC, Jakobiec FA, Patel P., Periorbital Dermoid Cyst With Unique Trichilemmal Differentiation. Ophthal Plast Reconstr Surg. 2017	N	0
108	10.1080/09286586.2016.1255763	Sasongko MB, Agni AN, Wardhana FS, Kotha SP, Gupta P, Widayanti TW, Supanji, Widyaputri F, Widyaningrum R, Wong TY, Kawasaki R, Wang JJ, Pawiroranu S., Rationale and Methodology for a Community-Based Study of Diabetic Retinopathy in an Indonesian Population with Type 2 Diabetes Mellitus: The Jogjakarta Eye Diabetic Study in the Community. Ophthalmic Epidemiol. 2017	N	0
109	10.1111/jnc.14070	Bordone MP, González Fleitas MF, Pasquini LA, Bosco A, Sande PH, Rosenstein RE, Dorfman D., Involvement of microglia in early axoglial alterations of the optic nerve induced by experimental glaucoma. J Neurochem. 2017	N	0
110	10.1016/j.ajpath.2017.08.025	Kumar S, Nakashizuka H, Jones A, Lambert A, Zhao X, Shen M, Parker M, Wang S, Berriochoa Z, Fnu A, VanBeuge S, Chévez-Barrios P, Tso M, Rainier J, Fu Y., Proteolytic Degradation and Inflammation Play Critical Roles in Polypoidal Choroidal Vasculopathy. Am J Pathol. 2017	N	0
111	10.1017/S0031182017000270	Chen SJ, Zhang YX, Huang SG, Lu FL., Galectins expressed differently in genetically susceptible C57BL/6 and resistant BALB/c mice during acute ocular Toxoplasma gondii infection. Parasitology. 2017	N	0
112	10.1111/aos.13226	Wirth MA, Freiberg F, Pfau M, Wons J, Becker MD, Michels S., Optical coherence tomography angiography in age-related macular degeneration: persistence of vascular network in quiescent choroidal neovascularization. Acta Ophthalmol. 2017	N	0
113	10.1136/bjophthalmol-2015-307837	Dhalla K, Cousens S, Murdoch IE., Phacoemulsification compared with phacotrabeculectomy surgery: a within-person observational cohort study. Br J Ophthalmol. 2017	N	0
114	10.3171/2016.12.SPINE16540	Ibrahim TF, Sweis RT, Nockels RP., Reversible postoperative blindness caused by bilateral status epilepticus amauroticus following thoracolumbar deformity correction: case report. J Neurosurg Spine. 2017	N	0
115	10.1097/ICO.0000000000001263	Oliva-Biénzobas V, Navas A, C Astiazarán M, Chacón-Camacho OF, A Bermúdez-Magner J, Takane M, Graue-Hernández E, Zenteno JC., CYP1B1 Cytopathy: Uncommon Phenotype of a Homozygous CYP1B1 Deletion as Internal Corneal Ulcer of Von Hippel. Cornea. 2017	N	0
				13

## Sheet: Egypt
ID Number (please do not modify)	Digital Object Identifier (DOI)	Reference	Access to Full text (Y/N)	Column 0/1
1	10.1016/j.neulet.2016.12.057	Azuchi Y, Kimura A, Guo X, Akiyama G, Noro T, Harada C, Nishigaki A, Namekata K, Harada T., Valproic acid and ASK1 deficiency ameliorate optic neuritis and neurodegeneration in an animal model of multiple sclerosis. Neurosci Lett. 2017	Y	1
2	10.1111/cge.12895	Kletke S, Batmanabane V, Dai T, Vincent A, Li S, Gordon KA, Papsin BC, Cushing SL, Héon E., The combination of vestibular impairment and congenital sensorineural hearing loss predisposes patients to ocular anomalies, including Usher syndrome. Clin Genet. 2017	Y	1
3	10.1097/DSS.0000000000000787	Martínez-Palmer A, Calsina-Prat M, Ormaechea N, Toll A., Reconstruction of Combined Upper and Lower Eyelid Defects in a Patient With Lentigo Maligna. Dermatol Surg. 2017	N	0
4	10.1093/brain/awx236	Niturad CE, Lev D, Kalscheuer VM, Charzewska A, Schubert J, Lerman-Sagie T, Kroes HY, Oegema R, Traverso M, Specchio N, Lassota M, Chelly J, Bennett-Back O, Carmi N, Koffler-Brill T, Iacomino M, Trivisano M, Capovilla G, Striano P, Nawara M, Rzonca S, Fischer U, et al., Rare GABRA3 variants are associated with epileptic seizures, encephalopathy and dysmorphic features. Brain. 2017	N	0
5	10.1080/13816810.2016.1188124	Tyagi P, Juma Z, Reddy AR., Retinal features in Mulvihill-Smith syndrome. Ophthalmic Genet. 2017	N	0
6	10.1097/WNO.0000000000000455	Mendes Marques NBPS, Barros SR, Miranda AF, Nobre Cardoso J, Parreira S, Fonseca T, Donaire NM, Campos N., Horizontal Gaze Palsy and Progressive Scoliosis With ROBO 3 Mutations in Patients From Cape Verde. J Neuroophthalmol. 2017	Y	1
7	10.1080/09286586.2017.1313992	Oye J, Mactaggart I, Polack S, Schmidt E, Tamo V, Okwen M, Kuper H., Prevalence and Causes of Visual Impairment in Fundong District, North West Cameroon: Results of a Population-Based Survey. Ophthalmic Epidemiol. 2017	N	0
8	10.1016/j.clae.2017.01.003	Gifford K, Gifford P, Hendicott PL, Schmid KL., Near binocular visual function in young adult orthokeratology versus soft contact lens wearers. Cont Lens Anterior Eye. 2017	Y	1
9	10.2217/bmm-2017-0218	Wostyn P, De Deyn PP., Intracranial pressure-induced optic nerve sheath response as a predictive biomarker for optic disc edema in astronauts. Biomark Med. 2017	N	0
10	10.1097/WNO.0000000000000555	Morrow MJ, Ko MW., Should Oral Corticosteroids Be Used to Treat Demyelinating Optic Neuritis? J Neuroophthalmol. 2017	Y	1
11	10.1080/09273972.2017.1349816	Morad Y, Pras E, Nemet A., Superior and Lateral Rectus Myopexy for Acquired Adult Distance Esotropia: A "One Size Fits All" Surgery. Strabismus. 2017	N	0
12	10.1097/IOP.0000000000000731	Repp DJ, Rubinstein TJ, Herreid PA, Sires BS., Biomechanics of the Levator Aponeurosis. Ophthal Plast Reconstr Surg. 2017	Y	1
13	10.1007/s00417-017-3817-4	De Gregorio A, Pedrotti E, Stevan G, Montali M, Morselli S., Safety and efficacy of multiple cyclocoagulation of ciliary bodies by high-intensity focused ultrasound in patients with glaucoma. Graefes Arch Clin Exp Ophthalmol. 2017	Y	1
14	10.1111/aos.13445	Ten Berge JCEM, van Dijk EHC, Schreurs MWJ, Vermeer J, Boon CJF, Rothova A., Antiretinal antibodies in central serous chorioretinopathy: prevalence and clinical implications. Acta Ophthalmol. 2018	Y	1
15	10.1007/s10072-016-2785-5	Kang H, Kim SK, Park KJ, Choi NC, Kwon OY, Lim BH., Hemianopic line bisection error in a patient with Alzheimer's disease. Neurol Sci. 2017	Y	1
16	10.1212/WNL.0000000000004312	Hennes EM, Baumann M, Schanda K, Anlar B, Bajer-Kornek B, Blaschek A, Brantner-Inthaler S, Diepold K, Eisenkölbl A, Gotwald T, Kuchukhidze G, Gruber-Sedlmayr U, Häusler M, Höftberger R, Karenfort M, Klein A, Koch J, Kraus V, Lechner C, Leiz S, Leypoldt F, Mader S, et al., Prognostic relevance of MOG antibodies in children with an acquired demyelinating syndrome. Neurology. 2017	N	0
17	10.1016/j.oftal.2016.08.006	Pareja-Ríos A, Bonaque-González S, Serrano-García M, Cabrera-López F, Abreu-Reyes P, Marrero-Saavedra MD., Tele-ophthalmology for diabetic retinopathy screening: 8 years of experience. Arch Soc Esp Oftalmol. 2017	N	0
18	10.1007/s00417-016-3530-8	Mikhail M, El-Rayes EN, Kojima K, Ajlan R, Rezende F., Catheter-guided suprachoroidal buckling of rhegmatogenous retinal detachments secondary to peripheral retinal breaks. Graefes Arch Clin Exp Ophthalmol. 2017	Y	1
19	10.1007/s00417-017-3616-y	Shah MA, Agrawal R, Teoh R, Shah SM, Patel K, Gupta S, Gosai S., Pediatric ocular trauma score as a prognostic tool in the management of pediatric traumatic cataracts. Graefes Arch Clin Exp Ophthalmol. 2017	Y	1
20	10.1016/j.jfo.2016.09.014	Zaarour K, Slim E, Antoun J, Waked N., Thick keratoconic cornea associated with posterior polymorphous corneal dystrophy. J Fr Ophtalmol. 2017	N	0
21	10.1097/IAE.0000000000001311	Shifera AS, Pennesi ME, Yang P, Lin P., ULTRA-WIDE-FIELD FUNDUS AUTOFLUORESCENCE FINDINGS IN PATIENTS WITH ACUTE ZONAL OCCULT OUTER RETINOPATHY. Retina. 2017	N	0
22	10.1080/13816810.2017.1354384	Bryant L, Lozynska O, Han G, Morgan JIW, Gai X, Maguire AM, Aleman T, Bennett J., On variants and disease-causing mutations: Case studies of a SEMA4A variant identified in inherited blindness. Ophthalmic Genet. 2018	N	0
23	10.1097/IAE.0000000000001391	Cheung CMG, Yanagi Y, Mohla A, Lee SY, Mathur R, Chan CM, Yeo I, Wong TY., CHARACTERIZATION AND DIFFERENTIATION OF POLYPOIDAL CHOROIDAL VASCULOPATHY USING SWEPT SOURCE OPTICAL COHERENCE TOMOGRAPHY ANGIOGRAPHY. Retina. 2017	N	0
24	10.1016/j.jcjo.2016.08.003	Lassalle S, Maschi C, Caujolle JP, Giordanengo V, Hofman P., Inverted conjunctival papilloma: a certainly underestimated high-risk lesion for carcinomatous transformation-a case report. Can J Ophthalmol. 2017	Y	1
25	10.2217/epi-2017-0060	Piras IS, Mills G, Llaci L, Naymik M, Ramsey K, Belnap N, Balak CD, Jepsen WM, Szelinger S, Siniard AL, Lewis CR, LaFleur M, Richholt RF, De Both MD, Avela K, Rangasamy S, Craig DW, Narayanan V, Järvelä I, Huentelman MJ, Schrauwen I., Exploring genome-wide DNA methylation patterns in Aicardi syndrome. Epigenomics. 2017	N	0
26	10.1097/IJG.0000000000000551	Perez CI, Mellado F, Jones A, Colvin R., Trabeculectomy Combined With Collagen Matrix Implant (Ologen). J Glaucoma. 2017	Y	1
27	10.1016/j.jcjo.2016.07.015	De Oliveira PR, Berger AR, Chow DR., Optical coherence tomography angiography in chorioretinal disorders. Can J Ophthalmol. 2017	Y	1
28	10.1016/j.jneuroim.2017.07.006	Yoshikura N, Kimura A, Hayashi Y, Inuzuka T., Anti-C1q autoantibodies in patients with neuromyelitis optica spectrum disorders. J Neuroimmunol. 2017	Y	1
29	10.1097/SCS.0000000000003431	Na J, Choi SY, Baek S, Lee H., Hemorrhage and Infarction of the Conjunctiva and Orbit in Essential Thrombocythemia. J Craniofac Surg. 2017	Y	1
30	10.1097/ICB.0000000000000374	Despréaux R, Mrejen S, Quentel G, Cohen SY., EN FACE OPTICAL COHERENCE TOMOGRAPHY (OCT) AND OCT ANGIOGRAPHY FINDINGS IN RETINAL ASTROCYTIC HAMARTOMAS. Retin Cases Brief Rep. 2017	Y	1
31	10.1136/bjophthalmol-2016-309996	Dagi LR, MacKinnon S, Zurakowski D, Prabhu SP., Rectus muscle excyclorotation and V-pattern strabismus: a quantitative appraisal of clinical relevance in syndromic craniosynostosis. Br J Ophthalmol. 2017	N	0
32	10.1097/IAE.0000000000001351	Medina CA, Ortiz AG, Relhan N, Smiddy WE, Townsend JH, Flynn HW Jr., MACULAR HOLE AFTER PARS PLANA VITRECTOMY FOR RHEGMATOGENOUS RETINAL DETACHMENT. Retina. 2017	Y	1
33	10.1080/09286586.2016.1257027	Malkin AG, Goldstein JE, Massof RW., Multivariable Regression Model of the EuroQol 5-Dimension Questionnaire in Patients Seeking Outpatient Low Vision Rehabilitation. Ophthalmic Epidemiol. 2017	N	0
34	10.1007/s00018-017-2643-5	Kudo A., Introductory review: periostin-gene and protein structure. Cell Mol Life Sci. 2017	Y	1
35	10.1080/02713683.2017.1344712	Wang T, Zhu L, Peng Y, Shen N, Yu Y, Yao M, Zhu J., Photochemical Cross-Linking for Penetrating Corneal Wound Closure in Enucleated Porcine Eyes. Curr Eye Res. 2017	N	0
36	10.1093/brain/awx219	Gerber S, Charif M, Chevrollier A, Chaumette T, Angebault C, Kane MS, Paris A, Alban J, Quiles M, Delettre C, Bonneau D, Procaccio V, Amati-Bonneau P, Reynier P, Leruez S, Calmon R, Boddaert N, Funalot B, Rio M, Bouccara D, Meunier I, Sesaki H, et al., Mutations in DNM1L, as in OPA1, result indominant optic atrophy despite opposite effectson mitochondrial fusion and fission. Brain. 2017	N	0
37	10.1097/IAE.0000000000001683	Cheng YC, Shen JH, Chao AN, Chen KJ., Later Development of Posterior Staphyloma in Choroidal Osteoma With Choroidal Neovascularization. Retina. 2017	Y	1
38	10.2174/1567202614666161104115440	Shimazawa M, Inoue Y, Masuda T, Onodera R, Tahara K, Shimizu Y, Mibe Y, Tsuruma K, Takeuchi H, Hara H., Topical Diclofenac-Loaded Liposomes Ameliorate Laser-Induced Choroidal Neovascularization in Mice and Non-Human Primates. Curr Neurovasc Res. 2017	N	0
39	10.1007/s00405-016-4308-7	Ozsutcu M, Balci O, Tanriverdi C, Demirci G., Efficacy of adjunctive mitomycin C in transcanalicular diode laser dacryocystorhinostomy. Eur Arch Otorhinolaryngol. 2017	Y	1
40	10.1136/bjophthalmol-2016-309775	Aixinjueluo W, Usui T, Miyai T, Toyono T, Sakisaka T, Yamagami S., Accelerated transepithelial corneal cross-linking for progressive keratoconus: a prospective study of 12 months. Br J Ophthalmol. 2017	N	0
41	10.1016/j.ijporl.2016.11.027	Yin T, van der Meer G., Neonatal airway obstruction in bilateral congenital dacryocystocoele: Case report and review of the literature. Int J Pediatr Otorhinolaryngol. 2017	Y	1
42	10.1007/s00417-017-3860-1	Chan JCW, Choy BNK, Chan OCC, Li KKW., Early intraocular pressure change after peripheral iridotomy with ultralow fluence pattern scanning laser and Nd:YAG laser in primary angle-closure suspect: Kowloon East Pattern Scanning Laser Study Report No. 3. Graefes Arch Clin Exp Ophthalmol. 2018	Y	1
43	10.1136/bjophthalmol-2016-309245	Sharma S, Ang M, Najjar RP, Sng C, Cheung CY, Rukmini AV, Schmetterer L, Milea D., Optical coherence tomography angiography in acute non-arteritic anterior ischaemic optic neuropathy. Br J Ophthalmol. 2017	N	0
44	10.1080/01676830.2017.1279664	Medel R, Balaguer Solé Ò, Vasquez LM., Inferior tarsal muscle-conjunctivectomy for reverse ptosis repair: A novel technique. Orbit. 2017	N	0
45	10.1038/eye.2017.25	Betts T, Ahmed S, Maguire S, Watts P., Characteristics of non-vitreoretinal ocular injury in child maltreatment: a systematic review. Eye (Lond). 2017	Y	1
46	10.1007/s10792-016-0261-0	Altunel O, Duru N, Goktas A, Ozkose A, Goktas E, Atas M., Evaluation of foveal photoreceptor layer in eyes with macular edema associated with branch retinal vein occlusion after ozurdex treatment. Int Ophthalmol. 2017	Y	1
47	10.1159/000478705	Motohashi R, Noma H, Yasuda K, Kotake O, Goto H, Shimura M., Dynamics of Inflammatory Factors in Aqueous Humor during Ranibizumab or Aflibercept Treatment for Age-Related Macular Degeneration. Ophthalmic Res. 2017	N	0
48	10.1016/j.jns.2017.01.033	Kang S, Shaikh AG., Acquired pendular nystagmus. J Neurol Sci. 2017	Y	1
49	10.1097/WNO.0000000000000503	Sadaka A, Schockman SL, Golnik KC., Evaluation of Horner Syndrome in the MRI Era. J Neuroophthalmol. 2017	Y	1
50	10.1136/bjophthalmol-2016-310105	Jirawison C, Liu Y, Surasit K, Maningding E, Kamphaengkham S, Ausayakhun S, Heiden D, Margolis TP, Gonzales JA, Acharya NR, Keenan JD., Fundus findings in a series of patients with extrapulmonary tuberculosis in Thailand. Br J Ophthalmol. 2017	N	0
51	10.1016/j.neuroimage.2016.12.053	Pelland M, Orban P, Dansereau C, Lepore F, Bellec P, Collignon O., State-dependent modulation of functional connectivity in early blind individuals. Neuroimage. 2017	Y	1
52	10.1097/ICO.0000000000001130	Zhang X, Bitar M, Davis RM., Spontaneous Canalicular Plug Erosion After Punctal Plug Placement. Cornea. 2017	Y	1
53	10.3928/23258160-20171030-04	Stephens JD, Adam MK, Todorich B, Faia LJ, Garg S, Dunn JP, Mehta S., Optical Coherence Tomography Findings in Endogenous Fungal Chorioretinitis, Retinitis, and Endophthalmitis. Ophthalmic Surg Lasers Imaging Retina. 2017	N	0
54	10.1097/ICL.0000000000000297	Hashemi H, Rastad H, Emamian MH, Fotouhi A., Floppy Eyelid Syndrome and Its Determinants in Iranian Adults: A Population-Based Study. Eye Contact Lens. 2017	Y	1
55	10.1177/2165079916686592	Lurati AR., Identifying Personal Risk Factors for Falls in the Workplace. Workplace Health Saf. 2017	Y	1
56	10.1016/j.ad.2016.07.006	Miura T, Ohtsuka M, Yamamoto T., Sweet's syndrome-like eruption in association with the exacerbation of Behçet's disease after the Great East Japan Earthquake. Actas Dermosifiliogr. 2017	N	0
57	10.1001/jamaophthalmol.2017.1009	Borkar DS, Homayounfar G, Tham VM, Ray KJ, Vinoya AC, Uchida A, Acharya NR., Association Between Thyroid Disease and Uveitis: Results From the Pacific Ocular Inflammation Study. JAMA Ophthalmol. 2017	N	0
58	10.1111/opo.12332	Li SM, Kang MT, Wu SS, Meng B, Sun YY, Wei SF, Liu L, Peng X, Chen Z, Zhang F, Wang N., Studies using concentric ring bifocal and peripheral add multifocal contact lenses to slow myopia progression in school-aged children: a meta-analysis. Ophthalmic Physiol Opt. 2017	Y	1
59	10.1097/IAE.0000000000001666	Hwang CK, Kolomeyer AM, Brucker AJ, Morgan JIW, Nichols CW, Aleman TS., Localized Bilateral Juxtafoveal Photoreceptor Loss in POEMS: A New Association. Retina. 2017	Y	1
60	10.1159/000473701	Daien V, Le Pape A, Heve D, Villain M, Bremond Gignac D; Collaborators of the Epidemiology and Safety Program (EPISAFE).., Incidence and Characteristics of Congenital Cataract Surgery in France from 2010 to 2012: The EPISAFE Program. Ophthalmic Res. 2017	N	0
61	10.2337/db16-1364	Simó R, Hernández C., GLP-1R as a Target for the Treatment of Diabetic Retinopathy: Friend or Foe? Diabetes. 2017	Y	1
62	10.1016/j.ajo.2016.11.009	Ares WJ, Tonetti D, Yu JY, Monaco EA, Flickinger JC, Lunsford LD., Gamma Knife Radiosurgery for Uveal Metastases: Report of Three Cases and a Review of the Literature. Am J Ophthalmol. 2017	Y	1
63	10.1007/s40618-017-0608-z	Bartalena L, Veronesi G, Krassas GE, Wiersinga WM, Marcocci C, Marinò M, Salvi M, Daumerie C, Bournaud C, Stahl M, Sassi L, Azzolini C, Boboridis KG, Mourits MP, Soeters MR, Baldeschi L, Nardi M, Currò N, Boschi A, Bernard M, von Arx G, Perros P, et al., Does early response to intravenous glucocorticoids predict the final outcome in patients with moderate-to-severe and active Graves' orbitopathy?…	Y	1
64	10.1016/j.jneuroim.2017.08.003	Palterer B, Brugnolo F, Sieni E, Barilaro A, Parronchi P., Neuromyelitis optica, atypical hemophagocytic lymphohistiocytosis and heterozygous perforin A91V mutation. J Neuroimmunol. 2017	Y	1
65	10.1111/ped.13149	Demircioğlu Kılıc B, Akbalık Kara M, Ozcelik AA, Ustunsoy H, Balat A., Brachial artery pseudoaneurysm: Rare finding in childhood Behcet's disease. Pediatr Int. 2017	Y	1
66	10.3233/JAD-161190	Shellington EM, Heath M, Gill DP, Petrella RJ., Long-Term Maintenance of Executive-Related Oculomotor Improvements in Older Adults with Self-Reported Cognitive Complaints Following a 24-Week Multiple Modality Exercise Program. J Alzheimers Dis. 2017	N	0
67	10.1055/s-0043-100116	Li J, Cai Y, Sun X, Yao D, Xia J., MiR-346 and TRAb as Predicative Factors for Relapse in Graves' Disease Within One Year. Horm Metab Res. 2017	N	0
68	10.1097/ICO.0000000000001100	Farooq AV., Herpes Simplex Virus Keratitis and Resistance to Acyclovir. Cornea. 2017	Y	1
69	10.1080/02713683.2017.1341534	Modrzejewska M, Wiącek MP., A Novel Approach to the Differentiation of Intrabulbar Tumors in Color Doppler Imaging. Curr Eye Res. 2017	N	0
70	10.1080/02713683.2017.1358373	Yamada Y, Suzuma K, Onizuka N, Uematsu M, Mohamed YH, Kitaoka T., Evaluation of retinal blood flow before and after panretinal photocoagulation using pattern scan laser for diabetic retinopathy. Curr Eye Res. 2017	N	0
71	10.1097/IOP.0000000000000723	Chisholm SAM, Couch SM, Custer PL., Etiology and Management of Allergic Eyelid Dermatitis. Ophthal Plast Reconstr Surg. 2017	Y	1
72	10.1016/j.expneurol.2016.08.004	Eapen BC, Murphy DP, Cifu DX., Neuroprosthetics in amputee and brain injury rehabilitation. Exp Neurol. 2017	Y	1
73	10.1136/bjophthalmol-2016-309460	Bhardwaj M, Sen S, Chosdol K, Sharma A, Pushker N, Kashyap S, Bakhshi S, Bajaj MS., miRNA-200c and miRNA-141 as potential prognostic biomarkers and regulators of epithelial-mesenchymal transition in eyelid sebaceous gland carcinoma. Br J Ophthalmol. 2017	N	0
74	10.1136/jnnp-2017-315782	Evoli A, Alboini PE, Iorio R, Damato V, Bartoccioni E., Pattern of ocular involvement in myasthenia gravis with MuSK antibodies. J Neurol Neurosurg Psychiatry. 2017	N	0
75	10.3928/01913913-20170309-01	Rajavi Z, Feizi M, Behradfar N, Yaseri M, Sayanjali S, Motevaseli T, Sabbaghi H, Faghihi M., Inferior Oblique Overaction: Anterior Transposition Versus Myectomy. J Pediatr Ophthalmol Strabismus. 2017	N	0
76	10.1080/02713683.2016.1223317	Jia Y, Hu DN, Sun J, Zhou J., Correlations Between MMPs and TIMPs Levels in Aqueous Humor from High Myopia and Cataract Patients. Curr Eye Res. 2017	N	0
77	10.1097/IOP.0000000000000536	Cole SC, Eftekhari K, Oberg T, Mamalis N, Anderson RL., Osteolytic Sarcoidosis of the Orbital Roof Masquerading as a Malignant Orbital Lesion. Ophthal Plast Reconstr Surg. 2017	Y	1
78	10.1111/desc.12379	Hadad BS, Maurer D, Lewis TL., The role of early visual input in the development of contour interpolation: the case of subjective contours. Dev Sci. 2017	Y	1
79	10.3109/13816810.2016.1164192	Topçu V, Alp MY, Alp CK, Bakır A, Geylan D, Yılmazoğlu MÖ., A new familial case of Jalili syndrome caused by a novel mutation in CNNM4. Ophthalmic Genet. 2017	N	0
80	10.1016/j.ophtha.2017.07.010	Pflugfelder SC, de Paiva CS., The Pathophysiology of Dry Eye Disease: What We Know and Future Directions for Research. Ophthalmology. 2017	Y	1
81	10.14670/HH-11-820	Kimura A, Namekata K, Guo X, Harada C, Harada T., Dock3-NMDA receptor interaction as a target for glaucoma therapy. Histol Histopathol. 2017	N	0
82	10.1016/j.oftal.2016.03.021	Cañizares B, Yago I, Piñero Á, Ruiz M., Unilateral persistent fetal vasculature coexisting with anterior segment dysgenesia. Arch Soc Esp Oftalmol. 2017	N	0
83	10.1136/jmedgenet-2016-104212	Gerber S, Ding MG, Gérard X, Zwicker K, Zanlonghi X, Rio M, Serre V, Hanein S, Munnich A, Rotig A, Bianchi L, Amati-Bonneau P, Elpeleg O, Kaplan J, Brandt U, Rozet JM., Compound heterozygosity for severe and hypomorphic NDUFS2 mutations cause non-syndromic LHON-like optic neuropathy. J Med Genet. 2017	N	0
84	10.1093/hmg/ddx168	Whitman MC, Engle EC., Ocular congenital cranial dysinnervation disorders (CCDDs): insights into axon growth and guidance. Hum Mol Genet. 2017	N	0
85	10.1016/j.ophtha.2017.01.027	Wu Z, Saunders LJ, Daga FB, Diniz-Filho A, Medeiros FA., Frequency of Testing to Detect Visual Field Progression Derived Using a Longitudinal Cohort of Glaucoma Patients. Ophthalmology. 2017	Y	1
86	10.1038/eye.2017.34	Midena E, Pilotto E., Microperimetry in age: related macular degeneration. Eye (Lond). 2017	Y	1
87	10.1097/IOP.0000000000000806	Hirabayashi KE, Kalin-Hajdu E, Brodie FL, Kersten RC, Russell MS, Vagefi MR., Retrobulbar Injection of Amphotericin B for Orbital Mucormycosis. Ophthal Plast Reconstr Surg. 2017	Y	1
88	10.1097/ICU.0000000000000456	Sozeri Y, Salim S., Anticlotting agents and the surgical management of glaucoma. Curr Opin Ophthalmol. 2018	Y	1
89	10.1097/IAE.0000000000001368	Yong Huang X, Wu N, Li N, Wang Y, Shakoor A., Diagnostic and Therapeutic Challenges. Retina. 2017	Y	1
90	10.1007/s12031-016-0869-6	D'Amico AG, Maugeri G, Bucolo C, Saccone S, Federico C, Cavallaro S, D'Agata V., Nap Interferes with Hypoxia-Inducible Factors and VEGF Expression in Retina of Diabetic Rats. J Mol Neurosci. 2017	Y	1
91	10.1097/ICO.0000000000001129	Nakagawa H, Hattori T, Koike N, Ehara T, Narimatsu A, Kumakura S, Matsumoto T, Goto H., Number of Bacteria and Time of Coincubation With Bacteria Required for the Development of Acanthamoeba Keratitis. Cornea. 2017	Y	1
92	10.1097/IAE.0000000000001408	Pertl L, Haas A, Hausberger S, Pichler T, Rabensteiner DF, Seidel G, Malle EM, Weger M., CHANGE OF CHOROIDAL VOLUME IN UNTREATED CENTRAL SEROUS CHORIORETINOPATHY. Retina. 2017	Y	1
93	10.1002/dmrr.2860	Omori Y, Yanagisawa K, Sato A, Uchigata Y., The importance of nonstop treatment after delivery for pregnant women with type 2 diabetes. Diabetes Metab Res Rev. 2017	Y	1
94	10.1016/j.anai.2017.01.027	Bork K, Brehler R, Witzke G, Boor S, Heineke W, Hardt J., Blindness, tetraspasticity, and other signs of irreversible brain damage in hereditary angioedema. Ann Allergy Asthma Immunol. 2017	Y	1
95	10.1007/s10067-016-3417-4	Vitale A, Emmi G, Lopalco G, Gentileschi S, Silvestri E, Fabiani C, Urban ML, Frediani B, Galeazzi M, Iannone F, Rigante D, Cantarini L., Adalimumab effectiveness in Behçet's disease: short and long-term data from a multicenter retrospective observational study. Clin Rheumatol. 2017	Y	1
96	10.1038/nprot.2017.032	Lückoff A, Scholz R, Sennlaub F, Xu H, Langmann T., Comprehensive analysis of mouse retinal mononuclear phagocytes. Nat Protoc. 2017	Y	1
97	10.1097/ICO.0000000000001038	Micali A, Roszkowska AM, Postorino EI, Rania L, Aragona E, Wylegala E, Nowinska A, Ieni A, Calimeri S, Pisani A, Aragona P, Puzzolo D., Comparative Confocal and Histopathological Study of Corneal Changes in Multiple Myeloma. Cornea. 2017	Y	1
98	10.1097/ICU.0000000000000385	Daya SM., Conjunctival-limbal autograft. Curr Opin Ophthalmol. 2017	Y	1
99	10.1007/s10384-016-0490-9	Shalaby U., Diltiazem co treatment with cyclosporine for induction of disease remission in sight-threatening non-infectious intraocular inflammation. Jpn J Ophthalmol. 2017	Y	1
100	10.1016/j.ajo.2016.12.023	Tavares Ferreira J, Proença R, Alves M, Dias-Santos A, Santos BO, Cunha JP, Papoila AL, Abegão Pinto L., Retina and Choroid of Diabetic Patients Without Observed Retinal Vascular Changes: A Longitudinal Study. Am J Ophthalmol. 2017	Y	1
101	10.1016/j.jcjo.2016.07.026	Eom Y, Song JS, Kim HM., Spectacle plane add power of multifocal intraocular lenses according to effective lens position. Can J Ophthalmol. 2017	Y	1
102	10.1097/IAE.0000000000001401	Tye A, Klufas MA, McCannel CA, McCannel TA., Intracameral Air in Phacovitrectomy for Maintaining Intraocular Lens Position. Retina. 2017	Y	1
103	10.1111/aos.13385	Jacobsen AG, Brost B, Vorum H, Hargitai J., Functional benefits and patient satisfaction with upper blepharoplasty - evaluated by objective and subjective outcome measures. Acta Ophthalmol. 2017	Y	1
104	10.1136/bjophthalmol-2016-309504	Himori N, Kunikata H, Kawasaki R, Shiga Y, Omodaka K, Takahashi H, Miyata T, Nakazawa T., The association between skin autofluorescence and mean deviation in patients with open-angle glaucoma. Br J Ophthalmol. 2017	N	0
105	10.1007/s00417-017-3696-8	Callizo J, Pfeiffer S, Lahme E, van Oterendorp C, Khattab M, Bemme S, Kulanga M, Hoerauf H, Feltgen N., Risk of progression in macula-on rhegmatogenous retinal detachment. Graefes Arch Clin Exp Ophthalmol. 2017	Y	1
106	10.1111/cup.12909	Motaparthi K., Pseudoherpetic transient acantholytic dermatosis (Grover disease): case series and review of the literature. J Cutan Pathol. 2017	Y	1
107	10.1097/IOP.0000000000000837	Charles NC, Jakobiec FA, Patel P., Periorbital Dermoid Cyst With Unique Trichilemmal Differentiation. Ophthal Plast Reconstr Surg. 2017	Y	1
108	10.1080/09286586.2016.1255763	Sasongko MB, Agni AN, Wardhana FS, Kotha SP, Gupta P, Widayanti TW, Supanji, Widyaputri F, Widyaningrum R, Wong TY, Kawasaki R, Wang JJ, Pawiroranu S., Rationale and Methodology for a Community-Based Study of Diabetic Retinopathy in an Indonesian Population with Type 2 Diabetes Mellitus: The Jogjakarta Eye Diabetic Study in the Community. Ophthalmic Epidemiol. 2017	N	0
109	10.1111/jnc.14070	Bordone MP, González Fleitas MF, Pasquini LA, Bosco A, Sande PH, Rosenstein RE, Dorfman D., Involvement of microglia in early axoglial alterations of the optic nerve induced by experimental glaucoma. J Neurochem. 2017	Y	1
110	10.1016/j.ajpath.2017.08.025	Kumar S, Nakashizuka H, Jones A, Lambert A, Zhao X, Shen M, Parker M, Wang S, Berriochoa Z, Fnu A, VanBeuge S, Chévez-Barrios P, Tso M, Rainier J, Fu Y., Proteolytic Degradation and Inflammation Play Critical Roles in Polypoidal Choroidal Vasculopathy. Am J Pathol. 2017	Y	1
111	10.1017/S0031182017000270	Chen SJ, Zhang YX, Huang SG, Lu FL., Galectins expressed differently in genetically susceptible C57BL/6 and resistant BALB/c mice during acute ocular Toxoplasma gondii infection. Parasitology. 2017	N	0
112	10.1111/aos.13226	Wirth MA, Freiberg F, Pfau M, Wons J, Becker MD, Michels S., Optical coherence tomography angiography in age-related macular degeneration: persistence of vascular network in quiescent choroidal neovascularization. Acta Ophthalmol. 2017	Y	1
113	10.1136/bjophthalmol-2015-307837	Dhalla K, Cousens S, Murdoch IE., Phacoemulsification compared with phacotrabeculectomy surgery: a within-person observational cohort study. Br J Ophthalmol. 2017	N	0
114	10.3171/2016.12.SPINE16540	Ibrahim TF, Sweis RT, Nockels RP., Reversible postoperative blindness caused by bilateral status epilepticus amauroticus following thoracolumbar deformity correction: case report. J Neurosurg Spine. 2017	N	0
115	10.1097/ICO.0000000000001263	Oliva-Biénzobas V, Navas A, C Astiazarán M, Chacón-Camacho OF, A Bermúdez-Magner J, Takane M, Graue-Hernández E, Zenteno JC., CYP1B1 Cytopathy: Uncommon Phenotype of a Homozygous CYP1B1 Deletion as Internal Corneal Ulcer of Von Hippel. Cornea. 2017	Y	1
				70

## Sheet: Ecuador
ID Number (please do not modify)	Digital Object Identifier (DOI)	Reference	Access to Full text (Y/N)	Column 0/1
1	10.1016/j.neulet.2016.12.057	Azuchi Y, Kimura A, Guo X, Akiyama G, Noro T, Harada C, Nishigaki A, Namekata K, Harada T., Valproic acid and ASK1 deficiency ameliorate optic neuritis and neurodegeneration in an animal model of multiple sclerosis. Neurosci Lett. 2017	N	0
2	10.1111/cge.12895	Kletke S, Batmanabane V, Dai T, Vincent A, Li S, Gordon KA, Papsin BC, Cushing SL, Héon E., The combination of vestibular impairment and congenital sensorineural hearing loss predisposes patients to ocular anomalies, including Usher syndrome. Clin Genet. 2017	N	0
3	10.1097/DSS.0000000000000787	Martínez-Palmer A, Calsina-Prat M, Ormaechea N, Toll A., Reconstruction of Combined Upper and Lower Eyelid Defects in a Patient With Lentigo Maligna. Dermatol Surg. 2017	N	0
4	10.1093/brain/awx236	Niturad CE, Lev D, Kalscheuer VM, Charzewska A, Schubert J, Lerman-Sagie T, Kroes HY, Oegema R, Traverso M, Specchio N, Lassota M, Chelly J, Bennett-Back O, Carmi N, Koffler-Brill T, Iacomino M, Trivisano M, Capovilla G, Striano P, Nawara M, Rzonca S, Fischer U, et al., Rare GABRA3 variants are associated with epileptic seizures, encephalopathy and dysmorphic features. Brain. 2017	N	0
5	10.1080/13816810.2016.1188124	Tyagi P, Juma Z, Reddy AR., Retinal features in Mulvihill-Smith syndrome. Ophthalmic Genet. 2017	N	0
6	10.1097/WNO.0000000000000455	Mendes Marques NBPS, Barros SR, Miranda AF, Nobre Cardoso J, Parreira S, Fonseca T, Donaire NM, Campos N., Horizontal Gaze Palsy and Progressive Scoliosis With ROBO 3 Mutations in Patients From Cape Verde. J Neuroophthalmol. 2017	N	0
7	10.1080/09286586.2017.1313992	Oye J, Mactaggart I, Polack S, Schmidt E, Tamo V, Okwen M, Kuper H., Prevalence and Causes of Visual Impairment in Fundong District, North West Cameroon: Results of a Population-Based Survey. Ophthalmic Epidemiol. 2017	N	0
8	10.1016/j.clae.2017.01.003	Gifford K, Gifford P, Hendicott PL, Schmid KL., Near binocular visual function in young adult orthokeratology versus soft contact lens wearers. Cont Lens Anterior Eye. 2017	N	0
9	10.2217/bmm-2017-0218	Wostyn P, De Deyn PP., Intracranial pressure-induced optic nerve sheath response as a predictive biomarker for optic disc edema in astronauts. Biomark Med. 2017	N	0
10	10.1097/WNO.0000000000000555	Morrow MJ, Ko MW., Should Oral Corticosteroids Be Used to Treat Demyelinating Optic Neuritis? J Neuroophthalmol. 2017	N	0
11	10.1080/09273972.2017.1349816	Morad Y, Pras E, Nemet A., Superior and Lateral Rectus Myopexy for Acquired Adult Distance Esotropia: A "One Size Fits All" Surgery. Strabismus. 2017	N	0
12	10.1097/IOP.0000000000000731	Repp DJ, Rubinstein TJ, Herreid PA, Sires BS., Biomechanics of the Levator Aponeurosis. Ophthal Plast Reconstr Surg. 2017	N	0
13	10.1007/s00417-017-3817-4	De Gregorio A, Pedrotti E, Stevan G, Montali M, Morselli S., Safety and efficacy of multiple cyclocoagulation of ciliary bodies by high-intensity focused ultrasound in patients with glaucoma. Graefes Arch Clin Exp Ophthalmol. 2017	N	0
14	10.1111/aos.13445	Ten Berge JCEM, van Dijk EHC, Schreurs MWJ, Vermeer J, Boon CJF, Rothova A., Antiretinal antibodies in central serous chorioretinopathy: prevalence and clinical implications. Acta Ophthalmol. 2018	N	0
15	10.1007/s10072-016-2785-5	Kang H, Kim SK, Park KJ, Choi NC, Kwon OY, Lim BH., Hemianopic line bisection error in a patient with Alzheimer's disease. Neurol Sci. 2017	N	0
16	10.1212/WNL.0000000000004312	Hennes EM, Baumann M, Schanda K, Anlar B, Bajer-Kornek B, Blaschek A, Brantner-Inthaler S, Diepold K, Eisenkölbl A, Gotwald T, Kuchukhidze G, Gruber-Sedlmayr U, Häusler M, Höftberger R, Karenfort M, Klein A, Koch J, Kraus V, Lechner C, Leiz S, Leypoldt F, Mader S, et al., Prognostic relevance of MOG antibodies in children with an acquired demyelinating syndrome. Neurology. 2017	N	0
17	10.1016/j.oftal.2016.08.006	Pareja-Ríos A, Bonaque-González S, Serrano-García M, Cabrera-López F, Abreu-Reyes P, Marrero-Saavedra MD., Tele-ophthalmology for diabetic retinopathy screening: 8 years of experience. Arch Soc Esp Oftalmol. 2017	N	0
18	10.1007/s00417-016-3530-8	Mikhail M, El-Rayes EN, Kojima K, Ajlan R, Rezende F., Catheter-guided suprachoroidal buckling of rhegmatogenous retinal detachments secondary to peripheral retinal breaks. Graefes Arch Clin Exp Ophthalmol. 2017	N	0
19	10.1007/s00417-017-3616-y	Shah MA, Agrawal R, Teoh R, Shah SM, Patel K, Gupta S, Gosai S., Pediatric ocular trauma score as a prognostic tool in the management of pediatric traumatic cataracts. Graefes Arch Clin Exp Ophthalmol. 2017	N	0
20	10.1016/j.jfo.2016.09.014	Zaarour K, Slim E, Antoun J, Waked N., Thick keratoconic cornea associated with posterior polymorphous corneal dystrophy. J Fr Ophtalmol. 2017	N	0
21	10.1097/IAE.0000000000001311	Shifera AS, Pennesi ME, Yang P, Lin P., ULTRA-WIDE-FIELD FUNDUS AUTOFLUORESCENCE FINDINGS IN PATIENTS WITH ACUTE ZONAL OCCULT OUTER RETINOPATHY. Retina. 2017	N	0
22	10.1080/13816810.2017.1354384	Bryant L, Lozynska O, Han G, Morgan JIW, Gai X, Maguire AM, Aleman T, Bennett J., On variants and disease-causing mutations: Case studies of a SEMA4A variant identified in inherited blindness. Ophthalmic Genet. 2018	N	0
23	10.1097/IAE.0000000000001391	Cheung CMG, Yanagi Y, Mohla A, Lee SY, Mathur R, Chan CM, Yeo I, Wong TY., CHARACTERIZATION AND DIFFERENTIATION OF POLYPOIDAL CHOROIDAL VASCULOPATHY USING SWEPT SOURCE OPTICAL COHERENCE TOMOGRAPHY ANGIOGRAPHY. Retina. 2017	N	0
24	10.1016/j.jcjo.2016.08.003	Lassalle S, Maschi C, Caujolle JP, Giordanengo V, Hofman P., Inverted conjunctival papilloma: a certainly underestimated high-risk lesion for carcinomatous transformation-a case report. Can J Ophthalmol. 2017	N	0
25	10.2217/epi-2017-0060	Piras IS, Mills G, Llaci L, Naymik M, Ramsey K, Belnap N, Balak CD, Jepsen WM, Szelinger S, Siniard AL, Lewis CR, LaFleur M, Richholt RF, De Both MD, Avela K, Rangasamy S, Craig DW, Narayanan V, Järvelä I, Huentelman MJ, Schrauwen I., Exploring genome-wide DNA methylation patterns in Aicardi syndrome. Epigenomics. 2017	N	0
26	10.1097/IJG.0000000000000551	Perez CI, Mellado F, Jones A, Colvin R., Trabeculectomy Combined With Collagen Matrix Implant (Ologen). J Glaucoma. 2017	N	0
27	10.1016/j.jcjo.2016.07.015	De Oliveira PR, Berger AR, Chow DR., Optical coherence tomography angiography in chorioretinal disorders. Can J Ophthalmol. 2017	N	0
28	10.1016/j.jneuroim.2017.07.006	Yoshikura N, Kimura A, Hayashi Y, Inuzuka T., Anti-C1q autoantibodies in patients with neuromyelitis optica spectrum disorders. J Neuroimmunol. 2017	N	0
29	10.1097/SCS.0000000000003431	Na J, Choi SY, Baek S, Lee H., Hemorrhage and Infarction of the Conjunctiva and Orbit in Essential Thrombocythemia. J Craniofac Surg. 2017	N	0
30	10.1097/ICB.0000000000000374	Despréaux R, Mrejen S, Quentel G, Cohen SY., EN FACE OPTICAL COHERENCE TOMOGRAPHY (OCT) AND OCT ANGIOGRAPHY FINDINGS IN RETINAL ASTROCYTIC HAMARTOMAS. Retin Cases Brief Rep. 2017	N	0
31	10.1136/bjophthalmol-2016-309996	Dagi LR, MacKinnon S, Zurakowski D, Prabhu SP., Rectus muscle excyclorotation and V-pattern strabismus: a quantitative appraisal of clinical relevance in syndromic craniosynostosis. Br J Ophthalmol. 2017	N	0
32	10.1097/IAE.0000000000001351	Medina CA, Ortiz AG, Relhan N, Smiddy WE, Townsend JH, Flynn HW Jr., MACULAR HOLE AFTER PARS PLANA VITRECTOMY FOR RHEGMATOGENOUS RETINAL DETACHMENT. Retina. 2017	N	0
33	10.1080/09286586.2016.1257027	Malkin AG, Goldstein JE, Massof RW., Multivariable Regression Model of the EuroQol 5-Dimension Questionnaire in Patients Seeking Outpatient Low Vision Rehabilitation. Ophthalmic Epidemiol. 2017	N	0
34	10.1007/s00018-017-2643-5	Kudo A., Introductory review: periostin-gene and protein structure. Cell Mol Life Sci. 2017	N	0
35	10.1080/02713683.2017.1344712	Wang T, Zhu L, Peng Y, Shen N, Yu Y, Yao M, Zhu J., Photochemical Cross-Linking for Penetrating Corneal Wound Closure in Enucleated Porcine Eyes. Curr Eye Res. 2017	N	0
36	10.1093/brain/awx219	Gerber S, Charif M, Chevrollier A, Chaumette T, Angebault C, Kane MS, Paris A, Alban J, Quiles M, Delettre C, Bonneau D, Procaccio V, Amati-Bonneau P, Reynier P, Leruez S, Calmon R, Boddaert N, Funalot B, Rio M, Bouccara D, Meunier I, Sesaki H, et al., Mutations in DNM1L, as in OPA1, result indominant optic atrophy despite opposite effectson mitochondrial fusion and fission. Brain. 2017	N	0
37	10.1097/IAE.0000000000001683	Cheng YC, Shen JH, Chao AN, Chen KJ., Later Development of Posterior Staphyloma in Choroidal Osteoma With Choroidal Neovascularization. Retina. 2017	N	0
38	10.2174/1567202614666161104115440	Shimazawa M, Inoue Y, Masuda T, Onodera R, Tahara K, Shimizu Y, Mibe Y, Tsuruma K, Takeuchi H, Hara H., Topical Diclofenac-Loaded Liposomes Ameliorate Laser-Induced Choroidal Neovascularization in Mice and Non-Human Primates. Curr Neurovasc Res. 2017	N	0
39	10.1007/s00405-016-4308-7	Ozsutcu M, Balci O, Tanriverdi C, Demirci G., Efficacy of adjunctive mitomycin C in transcanalicular diode laser dacryocystorhinostomy. Eur Arch Otorhinolaryngol. 2017	N	0
40	10.1136/bjophthalmol-2016-309775	Aixinjueluo W, Usui T, Miyai T, Toyono T, Sakisaka T, Yamagami S., Accelerated transepithelial corneal cross-linking for progressive keratoconus: a prospective study of 12 months. Br J Ophthalmol. 2017	N	0
41	10.1016/j.ijporl.2016.11.027	Yin T, van der Meer G., Neonatal airway obstruction in bilateral congenital dacryocystocoele: Case report and review of the literature. Int J Pediatr Otorhinolaryngol. 2017	N	0
42	10.1007/s00417-017-3860-1	Chan JCW, Choy BNK, Chan OCC, Li KKW., Early intraocular pressure change after peripheral iridotomy with ultralow fluence pattern scanning laser and Nd:YAG laser in primary angle-closure suspect: Kowloon East Pattern Scanning Laser Study Report No. 3. Graefes Arch Clin Exp Ophthalmol. 2018	N	0
43	10.1136/bjophthalmol-2016-309245	Sharma S, Ang M, Najjar RP, Sng C, Cheung CY, Rukmini AV, Schmetterer L, Milea D., Optical coherence tomography angiography in acute non-arteritic anterior ischaemic optic neuropathy. Br J Ophthalmol. 2017	N	0
44	10.1080/01676830.2017.1279664	Medel R, Balaguer Solé Ò, Vasquez LM., Inferior tarsal muscle-conjunctivectomy for reverse ptosis repair: A novel technique. Orbit. 2017	N	0
45	10.1038/eye.2017.25	Betts T, Ahmed S, Maguire S, Watts P., Characteristics of non-vitreoretinal ocular injury in child maltreatment: a systematic review. Eye (Lond). 2017	N	0
46	10.1007/s10792-016-0261-0	Altunel O, Duru N, Goktas A, Ozkose A, Goktas E, Atas M., Evaluation of foveal photoreceptor layer in eyes with macular edema associated with branch retinal vein occlusion after ozurdex treatment. Int Ophthalmol. 2017	N	0
47	10.1159/000478705	Motohashi R, Noma H, Yasuda K, Kotake O, Goto H, Shimura M., Dynamics of Inflammatory Factors in Aqueous Humor during Ranibizumab or Aflibercept Treatment for Age-Related Macular Degeneration. Ophthalmic Res. 2017	N	0
48	10.1016/j.jns.2017.01.033	Kang S, Shaikh AG., Acquired pendular nystagmus. J Neurol Sci. 2017	N	0
49	10.1097/WNO.0000000000000503	Sadaka A, Schockman SL, Golnik KC., Evaluation of Horner Syndrome in the MRI Era. J Neuroophthalmol. 2017	N	0
50	10.1136/bjophthalmol-2016-310105	Jirawison C, Liu Y, Surasit K, Maningding E, Kamphaengkham S, Ausayakhun S, Heiden D, Margolis TP, Gonzales JA, Acharya NR, Keenan JD., Fundus findings in a series of patients with extrapulmonary tuberculosis in Thailand. Br J Ophthalmol. 2017	N	0
51	10.1016/j.neuroimage.2016.12.053	Pelland M, Orban P, Dansereau C, Lepore F, Bellec P, Collignon O., State-dependent modulation of functional connectivity in early blind individuals. Neuroimage. 2017	N	0
52	10.1097/ICO.0000000000001130	Zhang X, Bitar M, Davis RM., Spontaneous Canalicular Plug Erosion After Punctal Plug Placement. Cornea. 2017	N	0
53	10.3928/23258160-20171030-04	Stephens JD, Adam MK, Todorich B, Faia LJ, Garg S, Dunn JP, Mehta S., Optical Coherence Tomography Findings in Endogenous Fungal Chorioretinitis, Retinitis, and Endophthalmitis. Ophthalmic Surg Lasers Imaging Retina. 2017	N	0
54	10.1097/ICL.0000000000000297	Hashemi H, Rastad H, Emamian MH, Fotouhi A., Floppy Eyelid Syndrome and Its Determinants in Iranian Adults: A Population-Based Study. Eye Contact Lens. 2017	N	0
55	10.1177/2165079916686592	Lurati AR., Identifying Personal Risk Factors for Falls in the Workplace. Workplace Health Saf. 2017	N	0
56	10.1016/j.ad.2016.07.006	Miura T, Ohtsuka M, Yamamoto T., Sweet's syndrome-like eruption in association with the exacerbation of Behçet's disease after the Great East Japan Earthquake. Actas Dermosifiliogr. 2017	N	0
57	10.1001/jamaophthalmol.2017.1009	Borkar DS, Homayounfar G, Tham VM, Ray KJ, Vinoya AC, Uchida A, Acharya NR., Association Between Thyroid Disease and Uveitis: Results From the Pacific Ocular Inflammation Study. JAMA Ophthalmol. 2017	N	0
58	10.1111/opo.12332	Li SM, Kang MT, Wu SS, Meng B, Sun YY, Wei SF, Liu L, Peng X, Chen Z, Zhang F, Wang N., Studies using concentric ring bifocal and peripheral add multifocal contact lenses to slow myopia progression in school-aged children: a meta-analysis. Ophthalmic Physiol Opt. 2017	N	0
59	10.1097/IAE.0000000000001666	Hwang CK, Kolomeyer AM, Brucker AJ, Morgan JIW, Nichols CW, Aleman TS., Localized Bilateral Juxtafoveal Photoreceptor Loss in POEMS: A New Association. Retina. 2017	N	0
60	10.1159/000473701	Daien V, Le Pape A, Heve D, Villain M, Bremond Gignac D; Collaborators of the Epidemiology and Safety Program (EPISAFE).., Incidence and Characteristics of Congenital Cataract Surgery in France from 2010 to 2012: The EPISAFE Program. Ophthalmic Res. 2017	N	0
61	10.2337/db16-1364	Simó R, Hernández C., GLP-1R as a Target for the Treatment of Diabetic Retinopathy: Friend or Foe? Diabetes. 2017	N	0
62	10.1016/j.ajo.2016.11.009	Ares WJ, Tonetti D, Yu JY, Monaco EA, Flickinger JC, Lunsford LD., Gamma Knife Radiosurgery for Uveal Metastases: Report of Three Cases and a Review of the Literature. Am J Ophthalmol. 2017	N	0
63	10.1007/s40618-017-0608-z	Bartalena L, Veronesi G, Krassas GE, Wiersinga WM, Marcocci C, Marinò M, Salvi M, Daumerie C, Bournaud C, Stahl M, Sassi L, Azzolini C, Boboridis KG, Mourits MP, Soeters MR, Baldeschi L, Nardi M, Currò N, Boschi A, Bernard M, von Arx G, Perros P, et al., Does early response to intravenous glucocorticoids predict the final outcome in patients with moderate-to-severe and active Graves' orbitopathy?…	N	0
64	10.1016/j.jneuroim.2017.08.003	Palterer B, Brugnolo F, Sieni E, Barilaro A, Parronchi P., Neuromyelitis optica, atypical hemophagocytic lymphohistiocytosis and heterozygous perforin A91V mutation. J Neuroimmunol. 2017	N	0
65	10.1111/ped.13149	Demircioğlu Kılıc B, Akbalık Kara M, Ozcelik AA, Ustunsoy H, Balat A., Brachial artery pseudoaneurysm: Rare finding in childhood Behcet's disease. Pediatr Int. 2017	N	0
66	10.3233/JAD-161190	Shellington EM, Heath M, Gill DP, Petrella RJ., Long-Term Maintenance of Executive-Related Oculomotor Improvements in Older Adults with Self-Reported Cognitive Complaints Following a 24-Week Multiple Modality Exercise Program. J Alzheimers Dis. 2017	N	0
67	10.1055/s-0043-100116	Li J, Cai Y, Sun X, Yao D, Xia J., MiR-346 and TRAb as Predicative Factors for Relapse in Graves' Disease Within One Year. Horm Metab Res. 2017	N	0
68	10.1097/ICO.0000000000001100	Farooq AV., Herpes Simplex Virus Keratitis and Resistance to Acyclovir. Cornea. 2017	N	0
69	10.1080/02713683.2017.1341534	Modrzejewska M, Wiącek MP., A Novel Approach to the Differentiation of Intrabulbar Tumors in Color Doppler Imaging. Curr Eye Res. 2017	N	0
70	10.1080/02713683.2017.1358373	Yamada Y, Suzuma K, Onizuka N, Uematsu M, Mohamed YH, Kitaoka T., Evaluation of retinal blood flow before and after panretinal photocoagulation using pattern scan laser for diabetic retinopathy. Curr Eye Res. 2017	N	0
71	10.1097/IOP.0000000000000723	Chisholm SAM, Couch SM, Custer PL., Etiology and Management of Allergic Eyelid Dermatitis. Ophthal Plast Reconstr Surg. 2017	N	0
72	10.1016/j.expneurol.2016.08.004	Eapen BC, Murphy DP, Cifu DX., Neuroprosthetics in amputee and brain injury rehabilitation. Exp Neurol. 2017	N	0
73	10.1136/bjophthalmol-2016-309460	Bhardwaj M, Sen S, Chosdol K, Sharma A, Pushker N, Kashyap S, Bakhshi S, Bajaj MS., miRNA-200c and miRNA-141 as potential prognostic biomarkers and regulators of epithelial-mesenchymal transition in eyelid sebaceous gland carcinoma. Br J Ophthalmol. 2017	N	0
74	10.1136/jnnp-2017-315782	Evoli A, Alboini PE, Iorio R, Damato V, Bartoccioni E., Pattern of ocular involvement in myasthenia gravis with MuSK antibodies. J Neurol Neurosurg Psychiatry. 2017	N	0
75	10.3928/01913913-20170309-01	Rajavi Z, Feizi M, Behradfar N, Yaseri M, Sayanjali S, Motevaseli T, Sabbaghi H, Faghihi M., Inferior Oblique Overaction: Anterior Transposition Versus Myectomy. J Pediatr Ophthalmol Strabismus. 2017	N	0
76	10.1080/02713683.2016.1223317	Jia Y, Hu DN, Sun J, Zhou J., Correlations Between MMPs and TIMPs Levels in Aqueous Humor from High Myopia and Cataract Patients. Curr Eye Res. 2017	N	0
77	10.1097/IOP.0000000000000536	Cole SC, Eftekhari K, Oberg T, Mamalis N, Anderson RL., Osteolytic Sarcoidosis of the Orbital Roof Masquerading as a Malignant Orbital Lesion. Ophthal Plast Reconstr Surg. 2017	N	0
78	10.1111/desc.12379	Hadad BS, Maurer D, Lewis TL., The role of early visual input in the development of contour interpolation: the case of subjective contours. Dev Sci. 2017	N	0
79	10.3109/13816810.2016.1164192	Topçu V, Alp MY, Alp CK, Bakır A, Geylan D, Yılmazoğlu MÖ., A new familial case of Jalili syndrome caused by a novel mutation in CNNM4. Ophthalmic Genet. 2017	N	0
80	10.1016/j.ophtha.2017.07.010	Pflugfelder SC, de Paiva CS., The Pathophysiology of Dry Eye Disease: What We Know and Future Directions for Research. Ophthalmology. 2017	N	0
81	10.14670/HH-11-820	Kimura A, Namekata K, Guo X, Harada C, Harada T., Dock3-NMDA receptor interaction as a target for glaucoma therapy. Histol Histopathol. 2017	N	0
82	10.1016/j.oftal.2016.03.021	Cañizares B, Yago I, Piñero Á, Ruiz M., Unilateral persistent fetal vasculature coexisting with anterior segment dysgenesia. Arch Soc Esp Oftalmol. 2017	N	0
83	10.1136/jmedgenet-2016-104212	Gerber S, Ding MG, Gérard X, Zwicker K, Zanlonghi X, Rio M, Serre V, Hanein S, Munnich A, Rotig A, Bianchi L, Amati-Bonneau P, Elpeleg O, Kaplan J, Brandt U, Rozet JM., Compound heterozygosity for severe and hypomorphic NDUFS2 mutations cause non-syndromic LHON-like optic neuropathy. J Med Genet. 2017	N	0
84	10.1093/hmg/ddx168	Whitman MC, Engle EC., Ocular congenital cranial dysinnervation disorders (CCDDs): insights into axon growth and guidance. Hum Mol Genet. 2017	N	0
85	10.1016/j.ophtha.2017.01.027	Wu Z, Saunders LJ, Daga FB, Diniz-Filho A, Medeiros FA., Frequency of Testing to Detect Visual Field Progression Derived Using a Longitudinal Cohort of Glaucoma Patients. Ophthalmology. 2017	N	0
86	10.1038/eye.2017.34	Midena E, Pilotto E., Microperimetry in age: related macular degeneration. Eye (Lond). 2017	N	0
87	10.1097/IOP.0000000000000806	Hirabayashi KE, Kalin-Hajdu E, Brodie FL, Kersten RC, Russell MS, Vagefi MR., Retrobulbar Injection of Amphotericin B for Orbital Mucormycosis. Ophthal Plast Reconstr Surg. 2017	N	0
88	10.1097/ICU.0000000000000456	Sozeri Y, Salim S., Anticlotting agents and the surgical management of glaucoma. Curr Opin Ophthalmol. 2018	N	0
89	10.1097/IAE.0000000000001368	Yong Huang X, Wu N, Li N, Wang Y, Shakoor A., Diagnostic and Therapeutic Challenges. Retina. 2017	N	0
90	10.1007/s12031-016-0869-6	D'Amico AG, Maugeri G, Bucolo C, Saccone S, Federico C, Cavallaro S, D'Agata V., Nap Interferes with Hypoxia-Inducible Factors and VEGF Expression in Retina of Diabetic Rats. J Mol Neurosci. 2017	N	0
91	10.1097/ICO.0000000000001129	Nakagawa H, Hattori T, Koike N, Ehara T, Narimatsu A, Kumakura S, Matsumoto T, Goto H., Number of Bacteria and Time of Coincubation With Bacteria Required for the Development of Acanthamoeba Keratitis. Cornea. 2017	N	0
92	10.1097/IAE.0000000000001408	Pertl L, Haas A, Hausberger S, Pichler T, Rabensteiner DF, Seidel G, Malle EM, Weger M., CHANGE OF CHOROIDAL VOLUME IN UNTREATED CENTRAL SEROUS CHORIORETINOPATHY. Retina. 2017	N	0
93	10.1002/dmrr.2860	Omori Y, Yanagisawa K, Sato A, Uchigata Y., The importance of nonstop treatment after delivery for pregnant women with type 2 diabetes. Diabetes Metab Res Rev. 2017	N	0
94	10.1016/j.anai.2017.01.027	Bork K, Brehler R, Witzke G, Boor S, Heineke W, Hardt J., Blindness, tetraspasticity, and other signs of irreversible brain damage in hereditary angioedema. Ann Allergy Asthma Immunol. 2017	N	0
95	10.1007/s10067-016-3417-4	Vitale A, Emmi G, Lopalco G, Gentileschi S, Silvestri E, Fabiani C, Urban ML, Frediani B, Galeazzi M, Iannone F, Rigante D, Cantarini L., Adalimumab effectiveness in Behçet's disease: short and long-term data from a multicenter retrospective observational study. Clin Rheumatol. 2017	N	0
96	10.1038/nprot.2017.032	Lückoff A, Scholz R, Sennlaub F, Xu H, Langmann T., Comprehensive analysis of mouse retinal mononuclear phagocytes. Nat Protoc. 2017	N	0
97	10.1097/ICO.0000000000001038	Micali A, Roszkowska AM, Postorino EI, Rania L, Aragona E, Wylegala E, Nowinska A, Ieni A, Calimeri S, Pisani A, Aragona P, Puzzolo D., Comparative Confocal and Histopathological Study of Corneal Changes in Multiple Myeloma. Cornea. 2017	N	0
98	10.1097/ICU.0000000000000385	Daya SM., Conjunctival-limbal autograft. Curr Opin Ophthalmol. 2017	N	0
99	10.1007/s10384-016-0490-9	Shalaby U., Diltiazem co treatment with cyclosporine for induction of disease remission in sight-threatening non-infectious intraocular inflammation. Jpn J Ophthalmol. 2017	N	0
100	10.1016/j.ajo.2016.12.023	Tavares Ferreira J, Proença R, Alves M, Dias-Santos A, Santos BO, Cunha JP, Papoila AL, Abegão Pinto L., Retina and Choroid of Diabetic Patients Without Observed Retinal Vascular Changes: A Longitudinal Study. Am J Ophthalmol. 2017	N	0
101	10.1016/j.jcjo.2016.07.026	Eom Y, Song JS, Kim HM., Spectacle plane add power of multifocal intraocular lenses according to effective lens position. Can J Ophthalmol. 2017	N	0
102	10.1097/IAE.0000000000001401	Tye A, Klufas MA, McCannel CA, McCannel TA., Intracameral Air in Phacovitrectomy for Maintaining Intraocular Lens Position. Retina. 2017	N	0
103	10.1111/aos.13385	Jacobsen AG, Brost B, Vorum H, Hargitai J., Functional benefits and patient satisfaction with upper blepharoplasty - evaluated by objective and subjective outcome measures. Acta Ophthalmol. 2017	N	0
104	10.1136/bjophthalmol-2016-309504	Himori N, Kunikata H, Kawasaki R, Shiga Y, Omodaka K, Takahashi H, Miyata T, Nakazawa T., The association between skin autofluorescence and mean deviation in patients with open-angle glaucoma. Br J Ophthalmol. 2017	N	0
105	10.1007/s00417-017-3696-8	Callizo J, Pfeiffer S, Lahme E, van Oterendorp C, Khattab M, Bemme S, Kulanga M, Hoerauf H, Feltgen N., Risk of progression in macula-on rhegmatogenous retinal detachment. Graefes Arch Clin Exp Ophthalmol. 2017	N	0
106	10.1111/cup.12909	Motaparthi K., Pseudoherpetic transient acantholytic dermatosis (Grover disease): case series and review of the literature. J Cutan Pathol. 2017	N	0
107	10.1097/IOP.0000000000000837	Charles NC, Jakobiec FA, Patel P., Periorbital Dermoid Cyst With Unique Trichilemmal Differentiation. Ophthal Plast Reconstr Surg. 2017	N	0
108	10.1080/09286586.2016.1255763	Sasongko MB, Agni AN, Wardhana FS, Kotha SP, Gupta P, Widayanti TW, Supanji, Widyaputri F, Widyaningrum R, Wong TY, Kawasaki R, Wang JJ, Pawiroranu S., Rationale and Methodology for a Community-Based Study of Diabetic Retinopathy in an Indonesian Population with Type 2 Diabetes Mellitus: The Jogjakarta Eye Diabetic Study in the Community. Ophthalmic Epidemiol. 2017	N	0
109	10.1111/jnc.14070	Bordone MP, González Fleitas MF, Pasquini LA, Bosco A, Sande PH, Rosenstein RE, Dorfman D., Involvement of microglia in early axoglial alterations of the optic nerve induced by experimental glaucoma. J Neurochem. 2017	N	0
110	10.1016/j.ajpath.2017.08.025	Kumar S, Nakashizuka H, Jones A, Lambert A, Zhao X, Shen M, Parker M, Wang S, Berriochoa Z, Fnu A, VanBeuge S, Chévez-Barrios P, Tso M, Rainier J, Fu Y., Proteolytic Degradation and Inflammation Play Critical Roles in Polypoidal Choroidal Vasculopathy. Am J Pathol. 2017	N	0
111	10.1017/S0031182017000270	Chen SJ, Zhang YX, Huang SG, Lu FL., Galectins expressed differently in genetically susceptible C57BL/6 and resistant BALB/c mice during acute ocular Toxoplasma gondii infection. Parasitology. 2017	N	0
112	10.1111/aos.13226	Wirth MA, Freiberg F, Pfau M, Wons J, Becker MD, Michels S., Optical coherence tomography angiography in age-related macular degeneration: persistence of vascular network in quiescent choroidal neovascularization. Acta Ophthalmol. 2017	N	0
113	10.1136/bjophthalmol-2015-307837	Dhalla K, Cousens S, Murdoch IE., Phacoemulsification compared with phacotrabeculectomy surgery: a within-person observational cohort study. Br J Ophthalmol. 2017	N	0
114	10.3171/2016.12.SPINE16540	Ibrahim TF, Sweis RT, Nockels RP., Reversible postoperative blindness caused by bilateral status epilepticus amauroticus following thoracolumbar deformity correction: case report. J Neurosurg Spine. 2017	N	0
115	10.1097/ICO.0000000000001263	Oliva-Biénzobas V, Navas A, C Astiazarán M, Chacón-Camacho OF, A Bermúdez-Magner J, Takane M, Graue-Hernández E, Zenteno JC., CYP1B1 Cytopathy: Uncommon Phenotype of a Homozygous CYP1B1 Deletion as Internal Corneal Ulcer of Von Hippel. Cornea. 2017	N	0

[truncated: 17 more sheets: India, Indonesia, Iran, Jordan, Mexico, Netherland, Pakistan, France, Peru, RD_Congo, Russia, Senegal, Togo, Tunisia, UK, USA, New Zealand]
